# Supplementary material for: A reverse vaccinology approach to the identification and characterization of Ctenocephalides felis candidate protective antigens for the control of cat flea infestations
Source: PubMed Central journal article supplement (PMC5774092; doi:10.1186/s13071-018-2618-x), 2018-01-18
Supplement: 13071_2018_2618_MOESM1_ESM.pdf [file 13071_2018_2618_MOESM1_ESM.pdf]

Additional file 1. Dataset 1. Sequences of predicted transmembrane and secreted proteins encoded in the transcriptome and used for PIT.

>Locus\_12657\_Transcript\_1/1\_Confidence\_1.000\_Length\_2513|UNIGENE REPRESENTATIVE TRANSCRIPT|sp|A1Z8N1|TRE11\_DROME Facilitated trehalose transporter Tret1-1 OS=Drosophila melanogaster GN=Tret1-1 PE=1 SV=1|e=5.47E-157|from=339|to=1955|frame=-1|Fragment\_1 LGSDDEEIIAVARLIFGQREVSIDSKRKLRI

>Locus\_12657\_Transcript\_1/1\_Confidence\_1.000\_Length\_2513|UNIGENE REPRESENTATIVE TRANSCRIPT|sp|A1Z8N1|TRE11\_DROME Facilitated trehalose transporter Tret1-1 OS=Drosophila melanogaster GN=Tret1-1 PE=1 SV=1|e=5.47E-157|from=339|to=1955|frame=-1|Fragment\_2 EM

>Locus\_12657\_Transcript\_1/1\_Confidence\_1.000\_Length\_2513|UNIGENE REPRESENTATIVE TRANSCRIPT|sp|A1Z8N1|TRE11\_DROME Facilitated trehalose transporter Tret1-1 OS=Drosophila melanogaster GN=Tret1-1 PE=1 SV=1|e=5.47E-157|from=339|to=1955|frame=-1|Fragment\_3 ELQRMKEENLRSSVPYLASL

>Locus\_12657\_Transcript\_1/1\_Confidence\_1.000\_Length\_2513|UNIGENE REPRESENTATIVE TRANSCRIPT|sp|A1Z8N1|TRE11\_DROME Facilitated trehalose transporter Tret1-1 OS=Drosophila melanogaster GN=Tret1-1 PE=1 SV=1|e=5.47E-157|from=339|to=1955|frame=-1|Fragment\_4 VYQPTTPIRIATQ

>Locus\_12657\_Transcript\_1/1\_Confidence\_1.000\_Length\_2513|UNIGENE REPRESENTATIVE TRANSCRIPT|sp|A1Z8N1|TRE11\_DROME Facilitated trehalose transporter Tret1-1 OS=Drosophila melanogaster GN=Tret1-1 PE=1 SV=1|e=5.47E-157|from=339|to=1955|frame=-1|Fragment\_5 GYTSPALVTMTSENNT

>Locus\_12657\_Transcript\_1/1\_Confidence\_1.000\_Length\_2513|UNIGENE REPRESENTATIVE TRANSCRIPT|sp|A1Z8N1|TRE11\_DROME Facilitated trehalose transporter Tret1-1 OS=Drosophila melanogaster GN=Tret1-1 PE=1 SV=1|e=5.47E-157|from=339|to=1955|frame=-1|Fragment\_6 FGVTSQQVSW

>Locus\_12657\_Transcript\_1/1\_Confidence\_1.000\_Length\_2513|UNIGENE REPRESENTATIVE TRANSCRIPT|sp|A1Z8N1|TRE11\_DROME Facilitated trehalose transporter Tret1-1 OS=Drosophila melanogaster GN=Tret1-1 PE=1 SV=1|e=5.47E-157|from=339|to=1955|frame=-1|Fragment\_7 IEKFGRRMTILATAPPFALAWLLIACATDIWYVLSGRALSGLCVGIATLSLPVYLGETLQ SEVRGTLGLLPTALGNIGILVVFSTGMYLDRALAYIGAA

>Locus\_12657\_Transcript\_1/1\_Confidence\_1.000\_Length\_2513|UNIGENE REPRESENTATIVE TRANSCRIPT|sp|A1Z8N1|TRE11\_DROME Facilitated trehalose transporter Tret1-1 OS=Drosophila melanogaster GN=Tret1-1 PE=1 SV=1|e=5.47E-157|from=339|to=1955|frame=-1|Fragment\_8 PHWQVAHGNEQGARKSLQWLRGGNELEVAELKNIV

>Locus\_12657\_Transcript\_1/1\_Confidence\_1.000\_Length\_2513|UNIGENE REPRESENTATIVE TRANSCRIPT|sp|A1Z8N1|TRE11\_DROME Facilitated trehalose transporter Tret1-1 OS=Drosophila melanogaster GN=Tret1-1 PE=1 SV=1|e=5.47E-157|from=339|to=1955|frame=-1|Fragment\_9 STIESENISKNITILDLFKRNNLKPLLISLGLMLFQQFSGINAVIFYVMIFKDAGSSVD ENLCTIIVGFVNFVGFATFLATVLIIDRLGRKVLVYISGIAMTITLITLGGFFYVKHIGTDVS TIGWLPLACFVIYVVGFSLGFVFPVWLMGGEILPSKVRGTAASVATSFNWLCTFLVTKTF TDMLVVMGTYGAFWLFGTVCVIALFFVFFVPETQGRSLEDIELSMRGHSRKVGS LANMK PL

>Locus\_6993\_Transcript\_4/7\_Confidence\_0.316\_Length\_767|UNIGENE REPRESENTATIVE TRANSCRIPT|sp|A8J4S9|TREA\_APIME Trehalase OS=Apis mellifera PE=1 SV=1|e=6.78314E-41|from=319|to=765|frame=1|Fragment\_1 CKSEIYCRGELLDTVQMAKIFNDSKTFVDMKMKYDENKTMEK FYEMMNEIEPNQPNQTTI KQFVN NYFEPV GKEF

>Locus\_6993\_Transcript\_4/7\_Confidence\_0.316\_Length\_767|UNIGENE REPRESENTATIVE TRANSCRIPT|sp|A8J4S9|TREA\_APIME Trehalase OS=Apis mellifera PE=1 SV=1|e=6.78314E-41|from=319|to=765|frame=1|Fragment\_2 EFLNKIYDDSLRQFAEELHILWKQLGRKMDPKIKDEEEKYSIIYVENPVVVPVGGRFREFY YW

>Locus\_6993\_Transcript\_2/7\_Confidence\_0.263\_Length\_718|. |sp|A8J4S9| TREA\_APIME Trehalase OS=Apis mellifera PE=1 SV=1|e=2.24081E-19| from=438|to=710|frame=3|Fragment\_1 ANLQTVRVRYSEIYCRGELLDTVQMAKIFNDSKTFVDMKMKYDENKTMEK FYEMMNEIEP NQPNQTTIKQFVN NYFEPV GKEFIPWIPDDW

>Locus\_6993\_Transcript\_6/7\_Confidence\_0.263\_Length\_575|. |sp|A8J4S9| TREA\_APIME Trehalase OS=Apis mellifera PE=1 SV=1|e=1.35417E-20| from=319|to=567|frame=1|Fragment\_1 CKSEIYCRGELLDTVQMAKIFNDSKTFVDMKMKYDENKTMEK FYEMMNEIEPNQPNQTTI KQFVN NYFEPV GKEFIPWIPDDW

>Locus\_16221\_Transcript\_1/1\_Confidence\_1.000\_Length\_698|UNIGENE REPRESENTATIVE TRANSCRIPT|sp|D2A0H5|SNMP1\_TRICA Sensory neuron membrane protein 1 OS=Tribolium castaneum GN=SNMP01 PE=3 SV=1| e=2.07455E-46|from=5|to=622|frame=-2|Fragment\_1 YSFFGYRNNTALDSFTISRGLRNVGDLGKVLKFRGSQTLDMWMMR

>Locus\_16221\_Transcript\_1/1\_Confidence\_1.000\_Length\_698|UNIGENE REPRESENTATIVE TRANSCRIPT|sp|D2A0H5|SNMP1\_TRICA Sensory neuron membrane protein 1 OS=Tribolium castaneum GN=SNMP01 PE=3 SV=1| e=2.07455E-46|from=5|to=622|frame=-2|Fragment\_2 PVNETKSCTKLRGTDSTIFPPFLEPSEGLWSFSSDICRSIAAIYEGEGYKGIPIRRYNA TFGDPKTDPTKCYCPKDRPCPLAGTFDLSPCTGAPIIASLPHFFAADPKLVKDIKGLN PDKDKHEIFVDFESITGKPLSARKRMQFNMPL

>Locus\_8710\_Transcript\_1/2\_Confidence\_0.750\_Length\_8144|UNIGENE REPRESENTATIVE TRANSCRIPT|sp|097394|SDK\_DROME Protein sidekick OS=Drosophila melanogaster GN=sdk PE=1 SV=2|e=0|from=95|to=6547| frame=2|Fragment\_1

ESLQAPRFTTQPSASSNIISEGRTKILQCQALGYPPRYRWLRDQPLGDFSSSEPFYKIL NTRREDAGSYQCVASNDVGSIMSERIDFTVAYMGVFEDQIERTVFVESGQAAILDPLIE SHPTPSVTWQSDMGSLPYDHKFAVTSNHQLVILSASEADQRSYRAHAINTQSGKEENSAF IRVNVTDGYAYEVAPEIIKPTDLKIVKGQQLAELQCIANARPLHELETLWLKDGILIES SGISYNFNDPWNRTLGLLSANLTYSGQYTCNVRLRSGGFPTVTSKADVVVLEKPRFINNM RAETLGDYGSQVVLPCDVIGEMPPIIKWYKNVQE

>Locus\_8710\_Transcript\_1/2\_Confidence\_0.750\_Length\_8144|UNIGENE REPRESENTATIVE TRANSCRIPT|sp|097394|SDK\_DROME Protein sidekick OS=Drosophila melanogaster GN=sdk PE=1 SV=2|e=0|from=95|to=6547| frame=2|Fragment\_2

IQDKGYEVQEDGSLLIKRLATHDSAMFQCVARNEAGEQSGYTWLKVKTSKPILEVPPENV TVLDGKDATISCRAAGAPAPNVTWYYNDDGPLEINSHLQLLESGLLISDVRETDAGKYK CVRANEAGTVSGEAYLTMVVRTQIIQPPVDTNVLGLTATLQCKVSNDPSPYHIDWYQN HELIV

>Locus\_8710\_Transcript\_1/2\_Confidence\_0.750\_Length\_8144|UNIGENE REPRESENTATIVE TRANSCRIPT|sp|097394|SDK\_DROME Protein sidekick

OS=Drosophila melanogaster GN=sdk PE=1 SV=2|e=0|from=95|to=6547|  
frame=2|Fragment\_3  
FGNSPRINILIDGTLEIQAVRATDVGEYSCYVTSPPGGNETRTARLSVIELPFAPTNIKAE  
KLDTLTQRAINVSWTPGFDGNSPTKNFIVEKREVPEL

>Locus\_8710\_Transcript\_1/2\_Confidence\_0.750\_Length\_8144|UNIGENE  
REPRESENTATIVE TRANSCRIPT|sp|097394|SDK\_DROME Protein sidekick  
OS=Drosophila melanogaster GN=sdk PE=1 SV=2|e=0|from=95|to=6547|  
frame=2|Fragment\_4

GPLPDPLLNWVTELSNVSANQRWILLTNLKAAAAYQFRVSTVNSVGEVSPSEPSNVVMLP  
QEAPSGPPVGFVGSARSSSEIITQWQPPEEHRNGQILGYVIRYRLFGYNNSPWTSRNIT  
NEAQRNFLIQELITWKDYIVQIAAYNNKGVGVFTGAKIKTKEGVPESPTNVKAKALNS  
TSVRIWKKPPDPQKINGINQGYKLQAWISEIEENSNVIQVEARMLTVPPSLFDPLAEQST  
IMNGLEKFTYENITVLCFTDPGDGVRSKPTPVRTSEDPDEVSLQFNDVSDRAVNVAWA  
PPRQVNGILTYRVRYQIKDTPSTLKIIVNLSSNVTSMLVTQLQATTHYWFVTAHTAKGN  
GVPRTATIQSGVEPVLDPDPYQLALSNIIEAFSVVLQFTPGFDGNSITLWKVEAQTARNS  
TWFTIFEVSDPDATTLTGLVPFTVYRLRLIANNVVGHSLPSEPSKEFQTIQARPSHPP  
KNVTVRAMSATELRVRWIPLQQIEWFGNPRGYNITYASIEPNP

>Locus\_8710\_Transcript\_1/2\_Confidence\_0.750\_Length\_8144|UNIGENE  
REPRESENTATIVE TRANSCRIPT|sp|097394|SDK\_DROME Protein sidekick  
OS=Drosophila melanogaster GN=sdk PE=1 SV=2|e=0|from=95|to=6547|  
frame=2|Fragment\_5

VPEVRSVLIEDHTANSHVLDGLEEWTLYSISMHACNDVGSFSSPAAIERTREAVPSFGP  
LNVEANATSSTTIVVKWKEVPLEHQNGQIEGYKVYYGAGVR

>Locus\_8710\_Transcript\_1/2\_Confidence\_0.750\_Length\_8144|UNIGENE  
REPRESENTATIVE TRANSCRIPT|sp|097394|SDK\_DROME Protein sidekick  
OS=Drosophila melanogaster GN=sdk PE=1 SV=2|e=0|from=95|to=6547|  
frame=2|Fragment\_6

DPVRYKQILDNSTFTTTLTELKKYVQYHVQVLAFTRLGDGALSSPPIRIQTFEDAPGAPS  
NVSPFDVSYTTARIIDVDPQPNGEILAYRVTYHMLNPELNYSREFPPSDRTFRATELM  
AEQYYMFSVTAQTRLGWGKIASALVYTTNNREIPQPPSLPQISRSQVQAQQITFSWTPGR  
DGYAPLRYYTVQLRENEGPWHSLPERVNPVAVTSYATNLRPYSTYQFRIRATNDIGPSAY  
STESIEVRTLPAAPSKEISNIRAVPITPTKVRVEWDVLPYQYWSGDNDTGGYRVLFQVPT  
DFPAALQATPKEDVSGINSMLILSDLTPDRNYEVIVVAFNSQGLGPPSPPIITVYVGEAV  
PTGEPQSIQVQAVSSTEVLLKWKPKQSMQNGELLGYKIFYLVTDSPQEPENDKPIEEEI  
EVPATYSAHSLVFLDKYTEYKIQILAFNPAGDGPRSLPVTVRTLQGLPGPPMNLQFTDI  
TMNSLNVSWDPPKRNKDILGYIVTYETTEQNERFSKQVKQKVSETSLIVQSLEEEVYTY  
FTVRAQTKIDFGPAILGNITGTPQEGSPLSPKELTITKTISSVQMHSNSASGRGPILGY  
YIEAKRKNRGRWETVWRTSNGPLQEFVISYQSLLPSTSYKFRITTYNQYGISYPLYSEDS  
ILTPSKLYLEYGYLQHKPFYRQNWFMVALAATSIVIIIMVIAVLCVKSKSYKYKQEAQKT  
LEESMAMDIDDRQELALELYRSRHNASTMSGSGAGTLSRRLANGTLGRKSNNNNIHGGGV  
MNPALGKSPRRPSPASVAYHSDEESLKGYPDENPDDSSVT

>Locus\_8710\_Transcript\_1/2\_Confidence\_0.750\_Length\_8144|UNIGENE  
REPRESENTATIVE TRANSCRIPT|sp|097394|SDK\_DROME Protein sidekick  
OS=Drosophila melanogaster GN=sdk PE=1 SV=2|e=0|from=95|to=6547|  
frame=2|Fragment\_7

VRSDPHSFVNHYANVNDLSLRQSWKRQKPVRYSSYTDSEPEGSVVSLNNGGQIIMNNMAR  
SRAPLPGFSSFV

>Locus\_6595\_Transcript\_1/3\_Confidence\_0.714\_Length\_1093|UNIGENE  
REPRESENTATIVE TRANSCRIPT|sp|P0CY46|EGFR\_APIME Epidermal growth  
factor receptor OS=Apis mellifera GN=Egfr PE=2 SV=1|e=1.12262E-35|  
from=1|to=702|frame=1|Fragment\_1

TTQDEKDLIKNLATTLDGPEPVVEADEYLQPKSR

>Locus\_6595\_Transcript\_1/3\_Confidence\_0.714\_Length\_1093|UNIGENE

REPRESENTATIVE TRANSCRIPT|sp|P0CY46|EGFR\_APIME Epidermal growth factor receptor OS=Apis mellifera GN=Egfr PE=2 SV=1|e=1.12262E-35|from=1|to=702|frame=1|Fragment\_2  
TVTVLPP

>Locus\_6595\_Transcript\_1/3\_Confidence\_0.714\_Length\_1093|UNIGENE REPRESENTATIVE TRANSCRIPT|sp|P0CY46|EGFR\_APIME Epidermal growth factor receptor OS=Apis mellifera GN=Egfr PE=2 SV=1|e=1.12262E-35|from=1|to=702|frame=1|Fragment\_3  
SAGPQVAHN

>Locus\_6595\_Transcript\_1/3\_Confidence\_0.714\_Length\_1093|UNIGENE REPRESENTATIVE TRANSCRIPT|sp|P0CY46|EGFR\_APIME Epidermal growth factor receptor OS=Apis mellifera GN=Egfr PE=2 SV=1|e=1.12262E-35|from=1|to=702|frame=1|Fragment\_4  
NHENG

>Locus\_6595\_Transcript\_1/3\_Confidence\_0.714\_Length\_1093|UNIGENE REPRESENTATIVE TRANSCRIPT|sp|P0CY46|EGFR\_APIME Epidermal growth factor receptor OS=Apis mellifera GN=Egfr PE=2 SV=1|e=1.12262E-35|from=1|to=702|frame=1|Fragment\_5  
PGS

>Locus\_6595\_Transcript\_1/3\_Confidence\_0.714\_Length\_1093|UNIGENE REPRESENTATIVE TRANSCRIPT|sp|P0CY46|EGFR\_APIME Epidermal growth factor receptor OS=Apis mellifera GN=Egfr PE=2 SV=1|e=1.12262E-35|from=1|to=702|frame=1|Fragment\_6  
PESFMGSL

>Locus\_6595\_Transcript\_1/3\_Confidence\_0.714\_Length\_1093|UNIGENE REPRESENTATIVE TRANSCRIPT|sp|P0CY46|EGFR\_APIME Epidermal growth factor receptor OS=Apis mellifera GN=Egfr PE=2 SV=1|e=1.12262E-35|from=1|to=702|frame=1|Fragment\_7  
GQKRYCSDPLKG

>Locus\_6595\_Transcript\_1/3\_Confidence\_0.714\_Length\_1093|UNIGENE REPRESENTATIVE TRANSCRIPT|sp|P0CY46|EGFR\_APIME Epidermal growth factor receptor OS=Apis mellifera GN=Egfr PE=2 SV=1|e=1.12262E-35|from=1|to=702|frame=1|Fragment\_8  
ETTD

>Locus\_6595\_Transcript\_1/3\_Confidence\_0.714\_Length\_1093|UNIGENE REPRESENTATIVE TRANSCRIPT|sp|P0CY46|EGFR\_APIME Epidermal growth factor receptor OS=Apis mellifera GN=Egfr PE=2 SV=1|e=1.12262E-35|from=1|to=702|frame=1|Fragment\_9  
EVDTKRGEAHIGRLKLDLPLDEDDYLMPS

>Locus\_6595\_Transcript\_1/3\_Confidence\_0.714\_Length\_1093|UNIGENE REPRESENTATIVE TRANSCRIPT|sp|P0CY46|EGFR\_APIME Epidermal growth factor receptor OS=Apis mellifera GN=Egfr PE=2 SV=1|e=1.12262E-35|from=1|to=702|frame=1|Fragment\_10  
TQTSAYMDLIGDSKNPEQ

>Locus\_6595\_Transcript\_1/3\_Confidence\_0.714\_Length\_1093|UNIGENE REPRESENTATIVE TRANSCRIPT|sp|P0CY46|EGFR\_APIME Epidermal growth factor receptor OS=Apis mellifera GN=Egfr PE=2 SV=1|e=1.12262E-35|from=1|to=702|frame=1|Fragment\_11  
RAYPDFL

>Locus\_6595\_Transcript\_1/3\_Confidence\_0.714\_Length\_1093|UNIGENE REPRESENTATIVE TRANSCRIPT|sp|P0CY46|EGFR\_APIME Epidermal growth factor receptor OS=Apis mellifera GN=Egfr PE=2 SV=1|e=1.12262E-35|from=1|to=702|frame=1|Fragment\_12  
PAIDNPEYLLSSEPYSGPPPTQTLGIPLTG

>Locus\_6595\_Transcript\_1/3\_Confidence\_0.714\_Length\_1093|UNIGENE  
REPRESENTATIVE TRANSCRIPT|sp|P0CY46|EGFR\_APIME Epidermal growth  
factor receptor OS=Apis mellifera GN=Egfr PE=2 SV=1|e=1.12262E-35|  
from=1|to=702|frame=1|Fragment\_13  
IDKVDLQSVDSLQRQRTNKEDEISDHEYND

>Locus\_6595\_Transcript\_1/3\_Confidence\_0.714\_Length\_1093|UNIGENE  
REPRESENTATIVE TRANSCRIPT|sp|P0CY46|EGFR\_APIME Epidermal growth  
factor receptor OS=Apis mellifera GN=Egfr PE=2 SV=1|e=1.12262E-35|  
from=1|to=702|frame=1|Fragment\_14  
VQRELQ

>Locus\_6595\_Transcript\_1/3\_Confidence\_0.714\_Length\_1093|UNIGENE  
REPRESENTATIVE TRANSCRIPT|sp|P0CY46|EGFR\_APIME Epidermal growth  
factor receptor OS=Apis mellifera GN=Egfr PE=2 SV=1|e=1.12262E-35|  
from=1|to=702|frame=1|Fragment\_15  
PLRRSETTV

>Locus\_6595\_Transcript\_2/3\_Confidence\_0.714\_Length\_1092|. |sp|P0CY46|  
EGFR\_APIME Epidermal growth factor receptor OS=Apis mellifera  
GN=Egfr PE=2 SV=1|e=1.12262E-35|from=1|to=702|frame=1|Fragment\_1  
TTQDEKDLIKNLATTLDGPEPVEADEYLQPKSR

>Locus\_6595\_Transcript\_2/3\_Confidence\_0.714\_Length\_1092|. |sp|P0CY46|  
EGFR\_APIME Epidermal growth factor receptor OS=Apis mellifera  
GN=Egfr PE=2 SV=1|e=1.12262E-35|from=1|to=702|frame=1|Fragment\_2  
TVTVLPP

>Locus\_6595\_Transcript\_2/3\_Confidence\_0.714\_Length\_1092|. |sp|P0CY46|  
EGFR\_APIME Epidermal growth factor receptor OS=Apis mellifera  
GN=Egfr PE=2 SV=1|e=1.12262E-35|from=1|to=702|frame=1|Fragment\_3  
SAGPQVAHN

>Locus\_6595\_Transcript\_2/3\_Confidence\_0.714\_Length\_1092|. |sp|P0CY46|  
EGFR\_APIME Epidermal growth factor receptor OS=Apis mellifera  
GN=Egfr PE=2 SV=1|e=1.12262E-35|from=1|to=702|frame=1|Fragment\_4  
NHENG

>Locus\_6595\_Transcript\_2/3\_Confidence\_0.714\_Length\_1092|. |sp|P0CY46|  
EGFR\_APIME Epidermal growth factor receptor OS=Apis mellifera  
GN=Egfr PE=2 SV=1|e=1.12262E-35|from=1|to=702|frame=1|Fragment\_5  
PGS

>Locus\_6595\_Transcript\_2/3\_Confidence\_0.714\_Length\_1092|. |sp|P0CY46|  
EGFR\_APIME Epidermal growth factor receptor OS=Apis mellifera  
GN=Egfr PE=2 SV=1|e=1.12262E-35|from=1|to=702|frame=1|Fragment\_6  
PESFMGSL

>Locus\_6595\_Transcript\_2/3\_Confidence\_0.714\_Length\_1092|. |sp|P0CY46|  
EGFR\_APIME Epidermal growth factor receptor OS=Apis mellifera  
GN=Egfr PE=2 SV=1|e=1.12262E-35|from=1|to=702|frame=1|Fragment\_7  
GQKRYCSDPLKG

>Locus\_6595\_Transcript\_2/3\_Confidence\_0.714\_Length\_1092|. |sp|P0CY46|  
EGFR\_APIME Epidermal growth factor receptor OS=Apis mellifera  
GN=Egfr PE=2 SV=1|e=1.12262E-35|from=1|to=702|frame=1|Fragment\_8  
ETTD

>Locus\_6595\_Transcript\_2/3\_Confidence\_0.714\_Length\_1092|. |sp|P0CY46|  
EGFR\_APIME Epidermal growth factor receptor OS=Apis mellifera  
GN=Egfr PE=2 SV=1|e=1.12262E-35|from=1|to=702|frame=1|Fragment\_9  
EVDTKRGEAHIGRLKLDLPLDEDDYLMPS

>Locus\_6595\_Transcript\_2/3\_Confidence\_0.714\_Length\_1092|. |sp|P0CY46|  
EGFR\_APIME Epidermal growth factor receptor OS=Apis mellifera  
GN=Egfr PE=2 SV=1|e=1.12262E-35|from=1|to=702|frame=1|Fragment\_10

TQTSAYMDLIGDSKNPEQ

>Locus\_6595\_Transcript\_2/3\_Confidence\_0.714\_Length\_1092|. |sp|P0CY46|  
EGFR\_APIME Epidermal growth factor receptor OS=Apis mellifera  
GN=Egfr PE=2 SV=1|e=1.12262E-35|from=1|to=702|frame=1|Fragment\_11  
RAYPDFL

>Locus\_6595\_Transcript\_2/3\_Confidence\_0.714\_Length\_1092|. |sp|P0CY46|  
EGFR\_APIME Epidermal growth factor receptor OS=Apis mellifera  
GN=Egfr PE=2 SV=1|e=1.12262E-35|from=1|to=702|frame=1|Fragment\_12  
PAIDNPEYLLSSEPYSGPPPTQTLGIPLTG

>Locus\_6595\_Transcript\_2/3\_Confidence\_0.714\_Length\_1092|. |sp|P0CY46|  
EGFR\_APIME Epidermal growth factor receptor OS=Apis mellifera  
GN=Egfr PE=2 SV=1|e=1.12262E-35|from=1|to=702|frame=1|Fragment\_13  
IDKVDLQSVDSLQRQRTNKEDEISDHEYND

>Locus\_6595\_Transcript\_2/3\_Confidence\_0.714\_Length\_1092|. |sp|P0CY46|  
EGFR\_APIME Epidermal growth factor receptor OS=Apis mellifera  
GN=Egfr PE=2 SV=1|e=1.12262E-35|from=1|to=702|frame=1|Fragment\_14  
VQRELQ

>Locus\_6595\_Transcript\_2/3\_Confidence\_0.714\_Length\_1092|. |sp|P0CY46|  
EGFR\_APIME Epidermal growth factor receptor OS=Apis mellifera  
GN=Egfr PE=2 SV=1|e=1.12262E-35|from=1|to=702|frame=1|Fragment\_15  
PLRRSETTV

>Locus\_6595\_Transcript\_3/3\_Confidence\_0.714\_Length\_1092|. |sp|P0CY46|  
EGFR\_APIME Epidermal growth factor receptor OS=Apis mellifera  
GN=Egfr PE=2 SV=1|e=1.12262E-35|from=1|to=702|frame=1|Fragment\_1  
TTQDEKDLIKNLATTLDGPEPVVEADEYLQPKSR

>Locus\_6595\_Transcript\_3/3\_Confidence\_0.714\_Length\_1092|. |sp|P0CY46|  
EGFR\_APIME Epidermal growth factor receptor OS=Apis mellifera  
GN=Egfr PE=2 SV=1|e=1.12262E-35|from=1|to=702|frame=1|Fragment\_2  
TVTVLPP

>Locus\_6595\_Transcript\_3/3\_Confidence\_0.714\_Length\_1092|. |sp|P0CY46|  
EGFR\_APIME Epidermal growth factor receptor OS=Apis mellifera  
GN=Egfr PE=2 SV=1|e=1.12262E-35|from=1|to=702|frame=1|Fragment\_3  
SAGPQVAHN

>Locus\_6595\_Transcript\_3/3\_Confidence\_0.714\_Length\_1092|. |sp|P0CY46|  
EGFR\_APIME Epidermal growth factor receptor OS=Apis mellifera  
GN=Egfr PE=2 SV=1|e=1.12262E-35|from=1|to=702|frame=1|Fragment\_4  
NHENG

>Locus\_6595\_Transcript\_3/3\_Confidence\_0.714\_Length\_1092|. |sp|P0CY46|  
EGFR\_APIME Epidermal growth factor receptor OS=Apis mellifera  
GN=Egfr PE=2 SV=1|e=1.12262E-35|from=1|to=702|frame=1|Fragment\_5  
PGS

>Locus\_6595\_Transcript\_3/3\_Confidence\_0.714\_Length\_1092|. |sp|P0CY46|  
EGFR\_APIME Epidermal growth factor receptor OS=Apis mellifera  
GN=Egfr PE=2 SV=1|e=1.12262E-35|from=1|to=702|frame=1|Fragment\_6  
PESFMGSL

>Locus\_6595\_Transcript\_3/3\_Confidence\_0.714\_Length\_1092|. |sp|P0CY46|  
EGFR\_APIME Epidermal growth factor receptor OS=Apis mellifera  
GN=Egfr PE=2 SV=1|e=1.12262E-35|from=1|to=702|frame=1|Fragment\_7  
GQKRYCSDPLKG

>Locus\_6595\_Transcript\_3/3\_Confidence\_0.714\_Length\_1092|. |sp|P0CY46|  
EGFR\_APIME Epidermal growth factor receptor OS=Apis mellifera  
GN=Egfr PE=2 SV=1|e=1.12262E-35|from=1|to=702|frame=1|Fragment\_8  
ETTD

>Locus\_6595\_Transcript\_3/3\_Confidence\_0.714\_Length\_1092|. |sp|P0CY46|

EGFR\_APIME Epidermal growth factor receptor OS=Apis mellifera  
GN=Egfr PE=2 SV=1|e=1.12262E-35|from=1|to=702|frame=1|Fragment\_9  
EVDTKRGEAHIGRLKLDLPLDEDDYLMPS  
>Locus\_6595\_Transcript\_3/3\_Confidence\_0.714\_Length\_1092|. |sp|P0CY46|  
EGFR\_APIME Epidermal growth factor receptor OS=Apis mellifera  
GN=Egfr PE=2 SV=1|e=1.12262E-35|from=1|to=702|frame=1|Fragment\_10  
TQTSAYMDLIGDSKNPEQ  
>Locus\_6595\_Transcript\_3/3\_Confidence\_0.714\_Length\_1092|. |sp|P0CY46|  
EGFR\_APIME Epidermal growth factor receptor OS=Apis mellifera  
GN=Egfr PE=2 SV=1|e=1.12262E-35|from=1|to=702|frame=1|Fragment\_11  
RAYPDFL  
>Locus\_6595\_Transcript\_3/3\_Confidence\_0.714\_Length\_1092|. |sp|P0CY46|  
EGFR\_APIME Epidermal growth factor receptor OS=Apis mellifera  
GN=Egfr PE=2 SV=1|e=1.12262E-35|from=1|to=702|frame=1|Fragment\_12  
PAIDNPEYLLSSEPYSPPPTQTLGIPLTG  
>Locus\_6595\_Transcript\_3/3\_Confidence\_0.714\_Length\_1092|. |sp|P0CY46|  
EGFR\_APIME Epidermal growth factor receptor OS=Apis mellifera  
GN=Egfr PE=2 SV=1|e=1.12262E-35|from=1|to=702|frame=1|Fragment\_13  
IDKVDLKQSVDSLQRQRTNKEDEISDHEYND  
>Locus\_6595\_Transcript\_3/3\_Confidence\_0.714\_Length\_1092|. |sp|P0CY46|  
EGFR\_APIME Epidermal growth factor receptor OS=Apis mellifera  
GN=Egfr PE=2 SV=1|e=1.12262E-35|from=1|to=702|frame=1|Fragment\_14  
VQRELQ  
>Locus\_6595\_Transcript\_3/3\_Confidence\_0.714\_Length\_1092|. |sp|P0CY46|  
EGFR\_APIME Epidermal growth factor receptor OS=Apis mellifera  
GN=Egfr PE=2 SV=1|e=1.12262E-35|from=1|to=702|frame=1|Fragment\_15  
PLRRSETTV  
>Locus\_12106\_Transcript\_1/1\_Confidence\_1.000\_Length\_799|. |sp|P0CY46|  
EGFR\_APIME Epidermal growth factor receptor OS=Apis mellifera  
GN=Egfr PE=2 SV=1|e=4.142E-129|from=3|to=797|frame=3|Fragment\_1  
EEAYIMATVEHPNLLQLLAVCMTSQMMLITQLMPLGCLLDYVRTHREKIGSKALLNWSTQ  
IARGMAYLEERRLVHRDLAARNVLVQNPNCVKITDFGLAKLLDVNEDEYKAAGGKMPIKW  
LALECIQHRIFFTHKSDVWAFGVTIWELLYGARPYENISAKDVPELIENGLKLPQPAICT  
LDIYCILVSCWMLDAEARPSFKQLTETFAEKAADPGRYLYIPGDKFMRLPTFTTQDEKDL  
IKNLATTLDGPEPVVEADEYLQPKS  
>Locus\_18909\_Transcript\_1/1\_Confidence\_1.000\_Length\_635|. |sp|P0CY46|  
EGFR\_APIME Epidermal growth factor receptor OS=Apis mellifera  
GN=Egfr PE=2 SV=1|e=6.3169E-105|from=1|to=633|frame=1|Fragment\_1  
TVEHPNLLQLLAVCMTSQMMLITQLMPLGCLLDYVRTHREKIGSKALLNWSTQIARGMAY  
LEERRLVHRDLAARNVLVQNPNCVKITDFGLAKLLDVNEDEYKAAGGKMPIKWLALECIQ  
HRIFFTHKSDVWAFGVTIWELLYGARPYENISAKDVPELIENGLKLPQPAICTLDIYCIL  
VSCWMLDAEARPSFKQLTETFAEKAADPGRY  
>Locus\_20651\_Transcript\_1/1\_Confidence\_1.000\_Length\_418|. |sp|P0CY46|  
EGFR\_APIME Epidermal growth factor receptor OS=Apis mellifera  
GN=Egfr PE=2 SV=1|e=3.07229E-60|from=3|to=416|frame=3|Fragment\_1  
DHLLKDSGACVRSCPEKKKAVDGEVPCDGPCKTCPASENIHAGNIDSFKDCTIIEGSL  
EILDHTFKGYQQVYANFSFGPRYHEMHPDRLEVFSTLKEVTGFINIQGSHEAFTNLSYFR  
NLETIGGRQLKENFFASL  
>Locus\_18908\_Transcript\_1/1\_Confidence\_1.000\_Length\_221|. |sp|P0CY46|  
EGFR\_APIME Epidermal growth factor receptor OS=Apis mellifera  
GN=Egfr PE=2 SV=1|e=6.02979E-25|from=3|to=221|frame=-1|Fragment\_1  
LDAEARPSFKQLTETFAEKAADPGRYLYIPGDKFMRLPTFTTQDEKDLIKNLATTLDGPE  
PVVEADEYLQPKS

>Locus\_26399\_Transcript\_1/1\_Confidence\_1.000\_Length\_565|UNIGENE  
REPRESENTATIVE TRANSCRIPT|sp|P10040|CRB\_DROME Protein crumbs  
OS=Drosophila melanogaster GN=crb PE=1 SV=3|e=1.17387E-45|from=1|  
to=564|frame=1|Fragment\_1  
MCECPAGFNGDYCENNIDECLEQPCIHG

>Locus\_26399\_Transcript\_1/1\_Confidence\_1.000\_Length\_565|UNIGENE  
REPRESENTATIVE TRANSCRIPT|sp|P10040|CRB\_DROME Protein crumbs  
OS=Drosophila melanogaster GN=crb PE=1 SV=3|e=1.17387E-45|from=1|  
to=564|frame=1|Fragment\_2  
VCIDRVAAFECDCSNTGYSGPLCERDIDECALTKVSCGKDGFCNTPGSYRCVCTAPYCG  
SGCRLLDPCTTGENPCRNGGTCTQTCTDRPSYECTCAEGFAGVNC TEEVSL

>Locus\_26399\_Transcript\_1/1\_Confidence\_1.000\_Length\_565|UNIGENE  
REPRESENTATIVE TRANSCRIPT|sp|P10040|CRB\_DROME Protein crumbs  
OS=Drosophila melanogaster GN=crb PE=1 SV=3|e=1.17387E-45|from=1|  
to=564|frame=1|Fragment\_3  
GGPSGAD

>Locus\_26399\_Transcript\_1/1\_Confidence\_1.000\_Length\_565|UNIGENE  
REPRESENTATIVE TRANSCRIPT|sp|P10040|CRB\_DROME Protein crumbs  
OS=Drosophila melanogaster GN=crb PE=1 SV=3|e=1.17387E-45|from=1|  
to=564|frame=1|Fragment\_4  
IMARSKRATRGTYSPSAQ

>Locus\_26399\_Transcript\_1/1\_Confidence\_1.000\_Length\_565|. |sp|P10040|  
CRB\_DROME Protein crumbs OS=Drosophila melanogaster GN=crb PE=1  
SV=3|e=1.49186E-24|from=4|to=399|frame=1|Fragment\_1  
CECPAGFNGDYCENNIDECLEQPCIH

>Locus\_26399\_Transcript\_1/1\_Confidence\_1.000\_Length\_565|. |sp|P10040|  
CRB\_DROME Protein crumbs OS=Drosophila melanogaster GN=crb PE=1  
SV=3|e=1.49186E-24|from=4|to=399|frame=1|Fragment\_2  
GVCIDRVAAFECDCSNTGYSGPLCERDIDECALTKVSCGKDGFCNTPGSYRCVCTAPYC  
GSGCRLLDPCTTGENPCRNGGTCTQTCTDRP

>Locus\_26399\_Transcript\_1/1\_Confidence\_1.000\_Length\_565|. |sp|P10040|  
CRB\_DROME Protein crumbs OS=Drosophila melanogaster GN=crb PE=1  
SV=3|e=1.49186E-24|from=4|to=399|frame=1|Fragment\_3  
SYECTCAEGFAGVNC

>Locus\_26399\_Transcript\_1/1\_Confidence\_1.000\_Length\_565|. |sp|P10040|  
CRB\_DROME Protein crumbs OS=Drosophila melanogaster GN=crb PE=1  
SV=3|e=1.49186E-24|from=4|to=399|frame=1|Fragment\_1  
CECPAGFNGDYCENNIDECLEQPCI

>Locus\_26399\_Transcript\_1/1\_Confidence\_1.000\_Length\_565|. |sp|P10040|  
CRB\_DROME Protein crumbs OS=Drosophila melanogaster GN=crb PE=1  
SV=3|e=1.49186E-24|from=4|to=399|frame=1|Fragment\_2  
HGVCIDRVAAFECDCSNTGYSGPLCERDIDECALTKVSCGKDGFCNTPGSYRCVCTAPY  
CGSGCRLLDPCTTGENPCRNGGTCTQ

>Locus\_26399\_Transcript\_1/1\_Confidence\_1.000\_Length\_565|. |sp|P10040|  
CRB\_DROME Protein crumbs OS=Drosophila melanogaster GN=crb PE=1  
SV=3|e=1.49186E-24|from=4|to=399|frame=1|Fragment\_3  
TCTDRPSYECTCAEGFAGVNC

>Locus\_26399\_Transcript\_1/1\_Confidence\_1.000\_Length\_565|. |sp|P10040|  
CRB\_DROME Protein crumbs OS=Drosophila melanogaster GN=crb PE=1  
SV=3|e=1.18207E-21|from=4|to=414|frame=1|Fragment\_1  
CECPAGFNGDYCENNIDECLEQPCIHG

>Locus\_26399\_Transcript\_1/1\_Confidence\_1.000\_Length\_565|. |sp|P10040|  
CRB\_DROME Protein crumbs OS=Drosophila melanogaster GN=crb PE=1  
SV=3|e=1.18207E-21|from=4|to=414|frame=1|Fragment\_2

VCIDRVAAFECDCSNTGYSGPLCERDIDECALTKVSCGKDGFCNTPGSYRCVCTAP  
>Locus\_26399\_Transcript\_1/1\_Confidence\_1.000\_Length\_565|. |sp|P10040|  
CRB\_DROME Protein crumbs OS=Drosophila melanogaster GN=crb PE=1  
SV=3|e=1.18207E-21|from=4|to=414|frame=1|Fragment\_3  
YCGSGCRL  
>Locus\_26399\_Transcript\_1/1\_Confidence\_1.000\_Length\_565|. |sp|P10040|  
CRB\_DROME Protein crumbs OS=Drosophila melanogaster GN=crb PE=1  
SV=3|e=1.18207E-21|from=4|to=414|frame=1|Fragment\_4  
LDPCTTGENPCRNGGTCTQTCTDRPSYECTCAEGFAGVNCTEEVS  
>Locus\_26399\_Transcript\_1/1\_Confidence\_1.000\_Length\_565|. |sp|P10040|  
CRB\_DROME Protein crumbs OS=Drosophila melanogaster GN=crb PE=1  
SV=3|e=1.30693E-20|from=4|to=411|frame=1|Fragment\_1  
CECPAGFNGDYCENNIDECLEQP  
>Locus\_26399\_Transcript\_1/1\_Confidence\_1.000\_Length\_565|. |sp|P10040|  
CRB\_DROME Protein crumbs OS=Drosophila melanogaster GN=crb PE=1  
SV=3|e=1.30693E-20|from=4|to=411|frame=1|Fragment\_2  
CIHVCIDRVAAFECDCSNTGYSGPLCERDIDECALTKVSCGKDGFCNTPGSYRCVCTA  
PYCGSGCRL  
>Locus\_26399\_Transcript\_1/1\_Confidence\_1.000\_Length\_565|. |sp|P10040|  
CRB\_DROME Protein crumbs OS=Drosophila melanogaster GN=crb PE=1  
SV=3|e=1.30693E-20|from=4|to=411|frame=1|Fragment\_3  
LDPCTTGENPCRNGGTCTQTCTDRPSYECTCAEGFAGVNCTEEVS  
>Locus\_26399\_Transcript\_1/1\_Confidence\_1.000\_Length\_565|. |sp|P10040|  
CRB\_DROME Protein crumbs OS=Drosophila melanogaster GN=crb PE=1  
SV=3|e=4.96634E-20|from=4|to=399|frame=1|Fragment\_1  
CECPAGFNGDYCENNIDECLEQPCIHG  
>Locus\_26399\_Transcript\_1/1\_Confidence\_1.000\_Length\_565|. |sp|P10040|  
CRB\_DROME Protein crumbs OS=Drosophila melanogaster GN=crb PE=1  
SV=3|e=4.96634E-20|from=4|to=399|frame=1|Fragment\_2  
VCIDRVAAFECDCSNTGYSGPLCERDIDECALTKVSCGKDGFCNTPGSYRCVCTAPYCG  
SGCRL  
>Locus\_26399\_Transcript\_1/1\_Confidence\_1.000\_Length\_565|. |sp|P10040|  
CRB\_DROME Protein crumbs OS=Drosophila melanogaster GN=crb PE=1  
SV=3|e=4.96634E-20|from=4|to=399|frame=1|Fragment\_3  
LDPCTTGENPCRNGGTCTQ  
>Locus\_26399\_Transcript\_1/1\_Confidence\_1.000\_Length\_565|. |sp|P10040|  
CRB\_DROME Protein crumbs OS=Drosophila melanogaster GN=crb PE=1  
SV=3|e=4.96634E-20|from=4|to=399|frame=1|Fragment\_4  
TCTDRP  
>Locus\_26399\_Transcript\_1/1\_Confidence\_1.000\_Length\_565|. |sp|P10040|  
CRB\_DROME Protein crumbs OS=Drosophila melanogaster GN=crb PE=1  
SV=3|e=4.96634E-20|from=4|to=399|frame=1|Fragment\_5  
SYECTCAEGFAGVNC  
>Locus\_26399\_Transcript\_1/1\_Confidence\_1.000\_Length\_565|. |sp|P10040|  
CRB\_DROME Protein crumbs OS=Drosophila melanogaster GN=crb PE=1  
SV=3|e=4.96634E-20|from=4|to=417|frame=1|Fragment\_1  
CECPAGFNGDYCENNIDECLEQPCI  
>Locus\_26399\_Transcript\_1/1\_Confidence\_1.000\_Length\_565|. |sp|P10040|  
CRB\_DROME Protein crumbs OS=Drosophila melanogaster GN=crb PE=1  
SV=3|e=4.96634E-20|from=4|to=417|frame=1|Fragment\_2  
HGVCIDRVAAFECDCSNTGYSGPLCERDIDECALTKVSCGKDGFCNTPGSYRCVCTAPY  
CGSGCR  
>Locus\_26399\_Transcript\_1/1\_Confidence\_1.000\_Length\_565|. |sp|P10040|  
CRB\_DROME Protein crumbs OS=Drosophila melanogaster GN=crb PE=1

SV=3|e=4.96634E-20|from=4|to=417|frame=1|Fragment\_3  
LLDPCTTGENPCRNGGTCTQTCTDRPS  
>Locus\_26399\_Transcript\_1/1\_Confidence\_1.000\_Length\_565|. |sp|P10040|  
CRB\_DROME Protein crumbs OS=Drosophila melanogaster GN=crb PE=1  
SV=3|e=4.96634E-20|from=4|to=417|frame=1|Fragment\_4  
YECTCAEGFAGVNCTEEVSL  
>Locus\_26399\_Transcript\_1/1\_Confidence\_1.000\_Length\_565|. |sp|P10040|  
CRB\_DROME Protein crumbs OS=Drosophila melanogaster GN=crb PE=1  
SV=3|e=1.59762E-18|from=4|to=399|frame=1|Fragment\_1  
CECPA  
>Locus\_26399\_Transcript\_1/1\_Confidence\_1.000\_Length\_565|. |sp|P10040|  
CRB\_DROME Protein crumbs OS=Drosophila melanogaster GN=crb PE=1  
SV=3|e=1.59762E-18|from=4|to=399|frame=1|Fragment\_2  
GFNGDYCENNIDECLEQPCIHGV  
>Locus\_26399\_Transcript\_1/1\_Confidence\_1.000\_Length\_565|. |sp|P10040|  
CRB\_DROME Protein crumbs OS=Drosophila melanogaster GN=crb PE=1  
SV=3|e=1.59762E-18|from=4|to=399|frame=1|Fragment\_3  
CIDRVAAFECDCSNTGYSGPLCERDIDECALTKVSCGKDGFC  
>Locus\_26399\_Transcript\_1/1\_Confidence\_1.000\_Length\_565|. |sp|P10040|  
CRB\_DROME Protein crumbs OS=Drosophila melanogaster GN=crb PE=1  
SV=3|e=1.59762E-18|from=4|to=399|frame=1|Fragment\_4  
HNTPGSYRCVCTAPYCGSGCRL  
>Locus\_26399\_Transcript\_1/1\_Confidence\_1.000\_Length\_565|. |sp|P10040|  
CRB\_DROME Protein crumbs OS=Drosophila melanogaster GN=crb PE=1  
SV=3|e=1.59762E-18|from=4|to=399|frame=1|Fragment\_5  
LDPCTTGENPCRNGGTCTQTCTDRPSYECTCAEGFAGVNC  
>Locus\_26399\_Transcript\_1/1\_Confidence\_1.000\_Length\_565|. |sp|P10040|  
CRB\_DROME Protein crumbs OS=Drosophila melanogaster GN=crb PE=1  
SV=3|e=7.92889E-18|from=4|to=411|frame=1|Fragment\_1  
CECPAGFNGDYCENNIDECLEQPCIH  
>Locus\_26399\_Transcript\_1/1\_Confidence\_1.000\_Length\_565|. |sp|P10040|  
CRB\_DROME Protein crumbs OS=Drosophila melanogaster GN=crb PE=1  
SV=3|e=7.92889E-18|from=4|to=411|frame=1|Fragment\_2  
GVCIDRVAAFECDCSN  
>Locus\_26399\_Transcript\_1/1\_Confidence\_1.000\_Length\_565|. |sp|P10040|  
CRB\_DROME Protein crumbs OS=Drosophila melanogaster GN=crb PE=1  
SV=3|e=7.92889E-18|from=4|to=411|frame=1|Fragment\_3  
TGYSGPLCERDIDECALTKVSCGKDGFC HNTPGSYRCVCTAPYCGSGCRL  
>Locus\_26399\_Transcript\_1/1\_Confidence\_1.000\_Length\_565|. |sp|P10040|  
CRB\_DROME Protein crumbs OS=Drosophila melanogaster GN=crb PE=1  
SV=3|e=7.92889E-18|from=4|to=411|frame=1|Fragment\_4  
LDPCTTGENPCRNGGTCTQTCTDRPSYECTC  
>Locus\_26399\_Transcript\_1/1\_Confidence\_1.000\_Length\_565|. |sp|P10040|  
CRB\_DROME Protein crumbs OS=Drosophila melanogaster GN=crb PE=1  
SV=3|e=7.92889E-18|from=4|to=411|frame=1|Fragment\_5  
AEGFAGVNCTEEV  
>Locus\_26399\_Transcript\_1/1\_Confidence\_1.000\_Length\_565|. |sp|P10040|  
CRB\_DROME Protein crumbs OS=Drosophila melanogaster GN=crb PE=1  
SV=3|e=2.47049E-11|from=58|to=399|frame=1|Fragment\_1  
CLEQPCI  
>Locus\_26399\_Transcript\_1/1\_Confidence\_1.000\_Length\_565|. |sp|P10040|  
CRB\_DROME Protein crumbs OS=Drosophila melanogaster GN=crb PE=1  
SV=3|e=2.47049E-11|from=58|to=399|frame=1|Fragment\_2  
HGVCIDRVAAFECDCSNTGYSGPLCERDIDECALTKVSCGKDGFC

>Locus\_26399\_Transcript\_1/1\_Confidence\_1.000\_Length\_565|. |sp|P10040|  
CRB\_DROME Protein crumbs OS=Drosophila melanogaster GN=crb PE=1  
SV=3|e=2.47049E-11|from=58|to=399|frame=1|Fragment\_3  
HNTPGSYRCVCTAPYCGSGCRL

>Locus\_26399\_Transcript\_1/1\_Confidence\_1.000\_Length\_565|. |sp|P10040|  
CRB\_DROME Protein crumbs OS=Drosophila melanogaster GN=crb PE=1  
SV=3|e=2.47049E-11|from=58|to=399|frame=1|Fragment\_4  
LDP

>Locus\_26399\_Transcript\_1/1\_Confidence\_1.000\_Length\_565|. |sp|P10040|  
CRB\_DROME Protein crumbs OS=Drosophila melanogaster GN=crb PE=1  
SV=3|e=2.47049E-11|from=58|to=399|frame=1|Fragment\_5  
CTTGENPCRNGGTCTQTCTDRPSYECTCAEGFAGVNC

>Locus\_7699\_Transcript\_5/12\_Confidence\_0.500\_Length\_2557|UNIGENE  
REPRESENTATIVE TRANSCRIPT|sp|P11584|ITBX\_DROME Integrin beta-PS  
OS=Drosophila melanogaster GN=mys PE=1 SV=3|e=0|from=186|to=2498|  
frame=3|Fragment\_1  
LLALFLFILNESNAQVAEKLTAQNPCIAKTTCSECIQTKSCAWCYQQDFGDRARCFQPSL  
TSSSSICDERFTWNPDNEQRMILQEALS

>Locus\_7699\_Transcript\_5/12\_Confidence\_0.500\_Length\_2557|UNIGENE  
REPRESENTATIVE TRANSCRIPT|sp|P11584|ITBX\_DROME Integrin beta-PS  
OS=Drosophila melanogaster GN=mys PE=1 SV=3|e=0|from=186|to=2498|  
frame=3|Fragment\_2  
KAHTHLGTGA

>Locus\_7699\_Transcript\_5/12\_Confidence\_0.500\_Length\_2557|UNIGENE  
REPRESENTATIVE TRANSCRIPT|sp|P11584|ITBX\_DROME Integrin beta-PS  
OS=Drosophila melanogaster GN=mys PE=1 SV=3|e=0|from=186|to=2498|  
frame=3|Fragment\_3  
TQGQKEIVQISPKVGLKLRINEVHKLNVYYAQAEDYPVDLYYLMDSLKSMEDDKERLSA  
LGDLLSEAMRNITSNFR LGFGSFVDKVVMPYVSTVPKCLKAPCDNCEAPYGYRNHMLPSM  
DTQLFSGEVRNASVSGNLDAPEGGFDAIMQAVVCRERIGWREKARRLLVFSTDAGFHYAG  
DGKLGGIITPNDGECHMDANGMYSYSSLQDYPISISQVNQKVKQNAINVIFAVTESQVNVY  
KKLSSHIEGSSTGELSNDSSNVVDLVKDQYSKISSSVEMKDNATSAVKIKYHSHCLSPGA  
GLGQETNKCDGLKVGDVVKFTTEIVVTECPANISEWRQTIQIYPVGINESLIIDLEMLCD  
CPCEHPGGEAYEPFSAKCGGAGTYMCGICDCDPAHFGRHCECSATDVTSHLDLAMGCRRD  
NTTVDVDCSGKGTVCVCGVCECEQRANIEEQISGKYCEDNFSCDRHNGILCSGPEHGVCVC  
GQCDCLPGWTGPACDCRDTNATCIAPGSTGEEMCSGHGVCCEGVCCKDVAEDGRYSGRYC  
EKCPGRCQEFKECVMCQMYKTGPLTE

>Locus\_7699\_Transcript\_5/12\_Confidence\_0.500\_Length\_2557|UNIGENE  
REPRESENTATIVE TRANSCRIPT|sp|P11584|ITBX\_DROME Integrin beta-PS  
OS=Drosophila melanogaster GN=mys PE=1 SV=3|e=0|from=186|to=2498|  
frame=3|Fragment\_4  
EECG

>Locus\_7699\_Transcript\_5/12\_Confidence\_0.500\_Length\_2557|UNIGENE  
REPRESENTATIVE TRANSCRIPT|sp|P11584|ITBX\_DROME Integrin beta-PS  
OS=Drosophila melanogaster GN=mys PE=1 SV=3|e=0|from=186|to=2498|  
frame=3|Fragment\_5  
NCT

>Locus\_7699\_Transcript\_5/12\_Confidence\_0.500\_Length\_2557|UNIGENE  
REPRESENTATIVE TRANSCRIPT|sp|P11584|ITBX\_DROME Integrin beta-PS  
OS=Drosophila melanogaster GN=mys PE=1 SV=3|e=0|from=186|to=2498|  
frame=3|Fragment\_6  
FVPIGQDVVEADEDKDEHLCSYYDEDDCRFTYVYSNEEDKVVVRAQNERECPPKVF

>Locus\_7699\_Transcript\_3/12\_Confidence\_0.219\_Length\_689|. |sp|P11584|

ITBX\_DROME Integrin beta-PS OS=Drosophila melanogaster GN=mys PE=1  
SV=3|e=6.66263E-82|from=1|to=630|frame=1|Fragment\_1  
TVDCSGKGTVCVCGVCECEQRANIEEQISGKYCECDNFSCDRHNGILCSGPEHGVCVCGQC  
DCLPGWTGPACDCRDTNATCIAPGSTGEEMCSGHGVCECGVCKCDVAEDGRYSGRYCEKC  
PTCPGRCQEFKECVMCQMYKTGPLTE  
>Locus\_7699\_Transcript\_3/12\_Confidence\_0.219\_Length\_689|. |sp|P11584|  
ITBX\_DROME Integrin beta-PS OS=Drosophila melanogaster GN=mys PE=1  
SV=3|e=6.66263E-82|from=1|to=630|frame=1|Fragment\_2  
EECG  
>Locus\_7699\_Transcript\_3/12\_Confidence\_0.219\_Length\_689|. |sp|P11584|  
ITBX\_DROME Integrin beta-PS OS=Drosophila melanogaster GN=mys PE=1  
SV=3|e=6.66263E-82|from=1|to=630|frame=1|Fragment\_3  
NCT  
>Locus\_7699\_Transcript\_3/12\_Confidence\_0.219\_Length\_689|. |sp|P11584|  
ITBX\_DROME Integrin beta-PS OS=Drosophila melanogaster GN=mys PE=1  
SV=3|e=6.66263E-82|from=1|to=630|frame=1|Fragment\_4  
FVPIGQDVVEADEDKDEHLCSYYDEDDCRFTYVYSNEEDKVVVRAQNERECPPKVF  
>Locus\_7699\_Transcript\_4/12\_Confidence\_0.156\_Length\_458|. |sp|P11584|  
ITBX\_DROME Integrin beta-PS OS=Drosophila melanogaster GN=mys PE=1  
SV=3|e=9.54484E-46|from=4|to=399|frame=1|Fragment\_1  
TCIAPGSTGEEMCSGHGVCECGVCKCDVAEDGRYSGRYCEKCPTCPGRCQEFKECVMCQ  
YKTGPLTE  
>Locus\_7699\_Transcript\_4/12\_Confidence\_0.156\_Length\_458|. |sp|P11584|  
ITBX\_DROME Integrin beta-PS OS=Drosophila melanogaster GN=mys PE=1  
SV=3|e=9.54484E-46|from=4|to=399|frame=1|Fragment\_2  
EECG  
>Locus\_7699\_Transcript\_4/12\_Confidence\_0.156\_Length\_458|. |sp|P11584|  
ITBX\_DROME Integrin beta-PS OS=Drosophila melanogaster GN=mys PE=1  
SV=3|e=9.54484E-46|from=4|to=399|frame=1|Fragment\_3  
NCT  
>Locus\_7699\_Transcript\_4/12\_Confidence\_0.156\_Length\_458|. |sp|P11584|  
ITBX\_DROME Integrin beta-PS OS=Drosophila melanogaster GN=mys PE=1  
SV=3|e=9.54484E-46|from=4|to=399|frame=1|Fragment\_4  
FVPIGQDVVEADEDKDEHLCSYYDEDDCRFTYVYSNEEDKVVVRAQNERECPPKVF  
>Locus\_11779\_Transcript\_1/2\_Confidence\_0.800\_Length\_437|. |sp|P11584|  
ITBX\_DROME Integrin beta-PS OS=Drosophila melanogaster GN=mys PE=1  
SV=3|e=2.62048E-55|from=3|to=437|frame=-1|Fragment\_1  
DCDPAHFGRHCECSATDVTSHLDLAMGCRDNTTTVDCSGKGTVCVCGVCECEQRANIEEQ  
ISGKYCECDNFSCDRHNGILCSGPEHGVCVCGQCDCPLPGWTGPACDCRDTNATCIAPGST  
GEEMCSGHGVCECGVCKCDVAEDGR  
>Locus\_15585\_Transcript\_1/1\_Confidence\_1.000\_Length\_437|. |sp|P11584|  
ITBX\_DROME Integrin beta-PS OS=Drosophila melanogaster GN=mys PE=1  
SV=3|e=2.62048E-55|from=1|to=435|frame=1|Fragment\_1  
DCDPAHFGRHCECSATDVTSHLDLAMGCRDNTTTVDCSGKGTVCVCGVCECEQRANIEEQ  
ISGKYCECDNFSCDRHNGILCSGPEHGVCVCGQCDCPLPGWTGPACDCRDTNATCIAPGST  
GEEMCSGHGVCECGVCKCDVAEDGR  
>Locus\_11779\_Transcript\_2/2\_Confidence\_0.600\_Length\_218|. |sp|P11584|  
ITBX\_DROME Integrin beta-PS OS=Drosophila melanogaster GN=mys PE=1  
SV=3|e=9.65325E-23|from=3|to=218|frame=-1|Fragment\_1  
DCDPAHFGRHCECSATDVTSHLDLAMGCRDNTTTVDCSGKGTVCVCGVCECEQRANIEEQ  
ISGKYCECDNF  
>Locus\_1711\_Transcript\_6/11\_Confidence\_0.593\_Length\_4778|UNIGENE  
REPRESENTATIVE TRANSCRIPT|sp|P13607|ATNA\_DROME Sodium/potassium-

transporting ATPase subunit alpha OS=Drosophila melanogaster  
GN=Atpalpha PE=1 SV=3|e=0|from=1761|to=4349|frame=-1|Fragment\_1  
DDKHGRSDSYRVATV

>Locus\_1711\_Transcript\_6/11\_Confidence\_0.593\_Length\_4778|UNIGENE  
REPRESENTATIVE TRANSCRIPT|sp|P13607|ATNA\_DROME Sodium/potassium-  
transporting ATPase subunit alpha OS=Drosophila melanogaster  
GN=Atpalpha PE=1 SV=3|e=0|from=1761|to=4349|frame=-1|Fragment\_2  
PTIDNLTADGQYKSRRKTPTKKQRKEGELDDLKQELDIDFHKVSPEELYQRFNTHPENG  
LSHAKAKENLERDGPNALTPPKQTPEWVKFCKNLFGGFALLLWIGAILCFVAYSQASTV  
EEPADDNLYLGIVLAAVVIVTGIFSYQESKSSKIMESFKNMVPQFATVLRERGEKLT LRA  
EDLVLGDVVEVKFGDRIPADIRIIESRGFKVDNSSLTGESEPQSRGPEFTNENPLETKNL  
AFFSTNAVEGTAKGVVISC GDNTVMGRIAGLASGLDTGETPIAKEIHHFIHLITGVAVFL  
GVTFVIAIILNYHWLDAVIFLIGIIVANVPEG

>Locus\_1711\_Transcript\_6/11\_Confidence\_0.593\_Length\_4778|UNIGENE  
REPRESENTATIVE TRANSCRIPT|sp|P13607|ATNA\_DROME Sodium/potassium-  
transporting ATPase subunit alpha OS=Drosophila melanogaster  
GN=Atpalpha PE=1 SV=3|e=0|from=1761|to=4349|frame=-1|Fragment\_3  
AKRMAKNCLVKNLEAVETLGSTSTICSDKTGTLTQNRMTVAHMWFDNQIIEADTTEDQS  
GVVYDRTPGFKALARIATLCNRAEFKGGQEGVPIKKEVSGDASEAALLKCMELALGDV  
MSIRKRNKKVCEIPFNSTNKYQVSIHETEDASDPRHVMVMKGAPERILEKCSTIFIGGKE  
KLLDEEMKEAFNNAY

>Locus\_1711\_Transcript\_6/11\_Confidence\_0.593\_Length\_4778|UNIGENE  
REPRESENTATIVE TRANSCRIPT|sp|P13607|ATNA\_DROME Sodium/potassium-  
transporting ATPase subunit alpha OS=Drosophila melanogaster  
GN=Atpalpha PE=1 SV=3|e=0|from=1761|to=4349|frame=-1|Fragment\_4  
GFCDLMLPTDKFPLGFKFDSDDPNFPIENLRFVGLMSMI

>Locus\_1711\_Transcript\_6/11\_Confidence\_0.593\_Length\_4778|UNIGENE  
REPRESENTATIVE TRANSCRIPT|sp|P13607|ATNA\_DROME Sodium/potassium-  
transporting ATPase subunit alpha OS=Drosophila melanogaster  
GN=Atpalpha PE=1 SV=3|e=0|from=1761|to=4349|frame=-1|Fragment\_5  
AKCRSAGIKVIMVTGDHPITAKAIAKSVGIISEGNETVEDIAQRLNIPVSEVNPREAKAA  
VVHGTELRELNSDQLDEILRYHTEIVFARTSPQKLIIVEGCQRMGAIIVAVTGDGVNDSP  
ALKKADIGVAMGIAGSDVSKQAADMILLDDNFASIVTGVEEGRLIFDNLKKSIAYT LSN  
IPEISPLAFILCDIPLPLGTVTILCIDLGTDMVPAISLAYEESSEDIMKRRPRNPYSDK  
LVNERCL

>Locus\_1711\_Transcript\_6/11\_Confidence\_0.593\_Length\_4778|. |sp|  
P13607|ATNA\_DROME Sodium/potassium-transporting ATPase subunit alpha  
OS=Drosophila melanogaster GN=Atpalpha PE=1 SV=3|e=1.4074E-111|  
from=1147|to=1767|frame=-3|Fragment\_1  
VPAISLAYEHA EADIMKRPPRDPVNDKLVNSRLISMAYGQIGMIQAAAGFFVYFVIMAEN  
GFLPMKLF GIRKQWDSKAVNDLTD SYGQEWYRDRKTLEYTCHTAFFVSIVVVQWADLIV  
CKTRRNSLLHQMRNWALNFGLVFETALAAFLSYTPGMDKGLRMFPLKFVWWLPALPFMI  
SIFIYDETRRFYLRRNPGGWLEQETYY

>Locus\_1711\_Transcript\_3/11\_Confidence\_0.519\_Length\_4684|. |sp|  
P13607|ATNA\_DROME Sodium/potassium-transporting ATPase subunit alpha  
OS=Drosophila melanogaster GN=Atpalpha PE=1 SV=3|e=0|from=1148|  
to=4255|frame=-1|Fragment\_1  
DDKHGRSDSYRVATV

>Locus\_1711\_Transcript\_3/11\_Confidence\_0.519\_Length\_4684|. |sp|  
P13607|ATNA\_DROME Sodium/potassium-transporting ATPase subunit alpha  
OS=Drosophila melanogaster GN=Atpalpha PE=1 SV=3|e=0|from=1148|  
to=4255|frame=-1|Fragment\_2  
PTIDNLTADGQYKSRRKTPTKKQRKEGELDDLKQELDIDFHKVSPEELYQRFNTHPENG  
LSHAKAKENLERDGPNALTPPKQTPEWVKFCKNLFGGFALLLWIGAILCFVAYSQASTV

EPPADDNLYLGIVLAAVVIVTGIFSYQESKSSKIMESFKNMVPQFATVLRERGEKLT LRA  
EDLVLGDVVEVKFGDRIPADIRIIESRGGKVDNSSLTGESEPQSRGPEFTNENPLETKNL  
AFFSTNAVEGTAKGVVISC GDNTVMGRIAGLASGLDTGETPIAKEIHHFIHLITGVAVFL  
GVTFVIAIILNYHWLDAVIFLIGIIVANVPEG  
>Locus\_1711\_Transcript\_3/11\_Confidence\_0.519\_Length\_4684|. |sp|  
P13607|ATNA\_DROME Sodium/potassium-transporting ATPase subunit alpha  
OS=Drosophila melanogaster GN=Atpalpha PE=1 SV=3|e=0|from=1148|  
to=4255|frame=-1|Fragment\_3  
AKRMAKNCLVKNLEAVETLGSTSTICSDKTGTLTQNRMTVAHMWFDNQIIEADTTEDQS  
GVVYDRTSPGFKALARIATLCNRAEFKGGQEGVPILKKEVSGDASEAALLKCMELALGDV  
MSIRKRNKKVCEIPFNSTNKYQVSIHETEDASDPRHVMVMKGAPERILEKCSTIFIGGKE  
KLLDEEMKEAFNNAY  
>Locus\_1711\_Transcript\_3/11\_Confidence\_0.519\_Length\_4684|. |sp|  
P13607|ATNA\_DROME Sodium/potassium-transporting ATPase subunit alpha  
OS=Drosophila melanogaster GN=Atpalpha PE=1 SV=3|e=0|from=1148|  
to=4255|frame=-1|Fragment\_4  
GFCDLMLPTDKFPLGFKFDSDDPNFPIENLRFVGLMSMI  
>Locus\_1711\_Transcript\_3/11\_Confidence\_0.519\_Length\_4684|. |sp|  
P13607|ATNA\_DROME Sodium/potassium-transporting ATPase subunit alpha  
OS=Drosophila melanogaster GN=Atpalpha PE=1 SV=3|e=0|from=1148|  
to=4255|frame=-1|Fragment\_5  
AKCRSAGIKVIMVTGDHPITAKAIAKSVGIISEGNETVEDIAQRLNIPVSEVNPREAKAA  
VVHGTELRELNQDLDEILRYHTEIVFARTSPQKLIIVEGCQRMGAIVAVTGDGVNDSP  
ALKKADIGVAMGIAGSDVSKQAADMILLDDNFASIVTGVEEGRLIFDNLKKSIAYT LTN  
IPEISPFILAFILCDIPLPLGTVTILCIDLGTDMVPAISLAYEHAEADIMKRPPRDPVNDK  
LVNSRLISMAYGQIGMIQAAAGFFVYFVIMAENGFLPMKLFGIRKQWDSKAVNDLTD SYG  
QEWYRDRKTLEYTCHTAFFVSIVVVQWADLIVCKTRRNSLLHQGMRNWALNFGLVFETA  
LAAFLSYTPGMDKGLRMFPLKFVWLPALPFMISIFIYDETRRFYLRRNPGGWLEQETYY  
>Locus\_1711\_Transcript\_4/11\_Confidence\_0.481\_Length\_4683|. |sp|  
P13607|ATNA\_DROME Sodium/potassium-transporting ATPase subunit alpha  
OS=Drosophila melanogaster GN=Atpalpha PE=1 SV=3|e=0|from=1147|  
to=4254|frame=-1|Fragment\_1  
DDKHGRSDSYRVATV  
>Locus\_1711\_Transcript\_4/11\_Confidence\_0.481\_Length\_4683|. |sp|  
P13607|ATNA\_DROME Sodium/potassium-transporting ATPase subunit alpha  
OS=Drosophila melanogaster GN=Atpalpha PE=1 SV=3|e=0|from=1147|  
to=4254|frame=-1|Fragment\_2  
PTIDNLTADGQYKSRKPTPKQRKEGELDDLKQELDIDFHKVSPEELYQRFNTHPENG  
LSHAKAKENLERDGNALTPPKQTPPEWVKFCKNLFGGFALLLWIGAILCFVAYS IQASTV  
EPPADDNLYLGIVLAAVVIVTGIFSYQESKSSKIMESFKNMVPQFATVLRERGEKLT LRA  
EDLVLGDVVEVKFGDRIPADIRIIESRGGKVDNSSLTGESEPQSRGPEFTNENPLETKNL  
AFFSTNAVEGTAKGVVISC GDNTVMGRIAGLASGLDTGETPIAKEIHHFIHLITGVAVFL  
GVTFVIAIILNYHWLDAVIFLIGIIVANVPEG  
>Locus\_1711\_Transcript\_4/11\_Confidence\_0.481\_Length\_4683|. |sp|  
P13607|ATNA\_DROME Sodium/potassium-transporting ATPase subunit alpha  
OS=Drosophila melanogaster GN=Atpalpha PE=1 SV=3|e=0|from=1147|  
to=4254|frame=-1|Fragment\_3  
AKRMAKNCLVKNLEAVETLGSTSTICSDKTGTLTQNRMTVAHMWFDNQIIEADTTEDQS  
GVVYDRTSPGFKALARIATLCNRAEFKGGQEGVPILKKEVSGDASEAALLKCMELALGDV  
MSIRKRNKKVCEIPFNSTNKYQVSIHETEDASDPRHVMVMKGAPERILEKCSTIFIGGKE  
KLLDEEMKEAFNNAY  
>Locus\_1711\_Transcript\_4/11\_Confidence\_0.481\_Length\_4683|. |sp|  
P13607|ATNA\_DROME Sodium/potassium-transporting ATPase subunit alpha  
OS=Drosophila melanogaster GN=Atpalpha PE=1 SV=3|e=0|from=1147|

to=4254|frame=-1|Fragment\_4  
GFCDLMLPTDKFPLGFKFDSDDPNFPIENLRFVGLMSMI  
>Locus\_1711\_Transcript\_4/11\_Confidence\_0.481\_Length\_4683|. |sp|  
P13607|ATNA\_DROME Sodium/potassium-transporting ATPase subunit alpha  
OS=Drosophila melanogaster GN=Atpalpha PE=1 SV=3|e=0|from=1147|  
to=4254|frame=-1|Fragment\_5  
AKCRSAGIKVIMVTGDHPITAKAIAKSVGIISEGNETVEDIAQRLNIPVSEVNPREAKAA  
VVHGTELRELNSDQLDEILRYHTEIVFARTSPQOKLIIVEGCQRMGAIVAVTGDGVNDSP  
ALKKADIGVAMGIAGSDVSKQAADMILLDDNFASIVTGVEEGRLIFDNLKKSIAYTTLTSN  
IPEISPFLAFILCDIPLPLGTVTILCIDLGTDMVPAISLAYEESD DIMKRRPRNPYSDK  
LVNERLISMAYGQIGMIQAAAGFFVYFVIMAENGFLPMKLFGIRKQWDSKAVNDLTD SYG  
QEWTYRDRKTLEYTCHTAFFVSIVVVQWADLIVCKTRRNSLLHQGMRNWALNFGLVFETA  
LAAFLSYTPGMDKGLRMFPLKFWWLPALPFMISIFIYDETRRFYLRRNPGGWLEQETYY  
>Locus\_1711\_Transcript\_5/11\_Confidence\_0.481\_Length\_4683|. |sp|  
P13607|ATNA\_DROME Sodium/potassium-transporting ATPase subunit alpha  
OS=Drosophila melanogaster GN=Atpalpha PE=1 SV=3|e=0|from=1147|  
to=4254|frame=-1|Fragment\_1  
DDKHGRSDSYRVATV  
>Locus\_1711\_Transcript\_5/11\_Confidence\_0.481\_Length\_4683|. |sp|  
P13607|ATNA\_DROME Sodium/potassium-transporting ATPase subunit alpha  
OS=Drosophila melanogaster GN=Atpalpha PE=1 SV=3|e=0|from=1147|  
to=4254|frame=-1|Fragment\_2  
PTIDDLTADGQYKSRKPTKKQRKEGELDDLKQELDIDFHKVSPEELYQRFNTHPENGL  
LSHAKAKENLERDGNALTPPKQTPEWVKFCKNLFGGFALLLWIGAILCFVAYSIAQSTV  
EEPADDNLYLGIVLAAVVIVTGFISYQESKSSKIMESFKNMVQFATVLRGEKLT LRA  
EDLVLGDVVEVKFGDRIPADIRIIESRGFKVDNSSLTGESEPQSRGPEFTNENPLETKNL  
AFFSTNAVEGTAKGVVISC GDNTVMGRIAGLASGLDTGETPIAKEIHHFIHLITGVAVFL  
GVTFVIAIILNYHWLDAVIFLIGIIVANVPEG  
>Locus\_1711\_Transcript\_5/11\_Confidence\_0.481\_Length\_4683|. |sp|  
P13607|ATNA\_DROME Sodium/potassium-transporting ATPase subunit alpha  
OS=Drosophila melanogaster GN=Atpalpha PE=1 SV=3|e=0|from=1147|  
to=4254|frame=-1|Fragment\_3  
AKRMAKNCLVKNLEAVETLGSTSTICSDKTGTLTQNRMTVAHMWFDNQIIEADTTEDQS  
GVVYDRTPGFKALARIATLCNRAEFKGGQEGVILKKEVSGDASEAALLKCMELALGDV  
MSIRKRNKKVCEIPFNSTNKYQVSIHETEDASDRHVMVMKGAPERILEKCSTIFIGGKE  
KLLDEEMKEAFNNAY  
>Locus\_1711\_Transcript\_5/11\_Confidence\_0.481\_Length\_4683|. |sp|  
P13607|ATNA\_DROME Sodium/potassium-transporting ATPase subunit alpha  
OS=Drosophila melanogaster GN=Atpalpha PE=1 SV=3|e=0|from=1147|  
to=4254|frame=-1|Fragment\_4  
GFCDLMLPTDKFPLGFKFDSDDPNFPIENLRFVGLMSMI  
>Locus\_1711\_Transcript\_5/11\_Confidence\_0.481\_Length\_4683|. |sp|  
P13607|ATNA\_DROME Sodium/potassium-transporting ATPase subunit alpha  
OS=Drosophila melanogaster GN=Atpalpha PE=1 SV=3|e=0|from=1147|  
to=4254|frame=-1|Fragment\_5  
AKCRSAGIKVIMVTGDHPITAKAIAKSVGIISEGNETVEDIAQRLNIPVSEVNPREAKAA  
VVHGTELRELNSDQLDEILRYHTEIVFARTSPQOKLIIVEGCQRMGAIVAVTGDGVNDSP  
ALKKADIGVAMGIAGSDVSKQAADMILLDDNFASIVTGVEEGRLIFDNLKKSIAYTTLTSN  
IPEISPFLAFILCDIPLPLGTVTILCIDLGTDMVPAISLAYEAPESD DIMKRRPRDPYRDN  
LVNRRLISMAYGQIGMIQAAAGFFVYFVIMAENGFLPMKLFGIRKQWDSKAVNDLTD SYG  
QEWTYRDRKTLEYTCHTAFFVSIVVVQWADLIVCKTRRNSLLHQGMRNWALNFGLVFETA  
LAAFLSYTPGMDKGLRMFPLKFWWLPALPFMISIFIYDETRRFYLRRNPGGWLEQETYY  
>Locus\_1711\_Transcript\_10/11\_Confidence\_0.481\_Length\_4683|. |sp|  
P13607|ATNA\_DROME Sodium/potassium-transporting ATPase subunit alpha

OS=Drosophila melanogaster GN=Atpalpha PE=1 SV=3|e=0|from=1147|  
to=4254|frame=-1|Fragment\_1  
DDKHGRSDSYRVATV  
>Locus\_1711\_Transcript\_10/11\_Confidence\_0.481\_Length\_4683|. |sp|  
P13607|ATNA\_DROME Sodium/potassium-transporting ATPase subunit alpha  
OS=Drosophila melanogaster GN=Atpalpha PE=1 SV=3|e=0|from=1147|  
to=4254|frame=-1|Fragment\_2  
PTIDNLTADGQYSRRKTPTKKQRKEGELDDLKQELDIDFHKVSPEELYQRFNTHPENGL  
LSHAKAKENLERDGNALTPPKQTPEWVKFCKNLFGGFALLLWIGAILCFVAYSIAQASTV  
EEPADDNLYLGIVLAAVVIVTGIFSYQQESKSSKIMESFKNMVPQFATVLRGEKLT  
EDLVLGDVVEVKFGDRIPADIRIIESRQKVDNSSLTGESEPQSRGPEFTNENPLETKNL  
AFFSTNAVEGTAKGVVISCNDNTVMGRIAGLASGLDTGETPIAKEIHHFIHLITGVAVFL  
GVTFVIAIILNYHWDVAIFLIGIIVANVPEG  
>Locus\_1711\_Transcript\_10/11\_Confidence\_0.481\_Length\_4683|. |sp|  
P13607|ATNA\_DROME Sodium/potassium-transporting ATPase subunit alpha  
OS=Drosophila melanogaster GN=Atpalpha PE=1 SV=3|e=0|from=1147|  
to=4254|frame=-1|Fragment\_3  
AKRMAKNCLVKNLEAVETLSTSTICSDKTGTLTQNRMTVAHMWFDNQIIEADTTEDQS  
GVVYDRTPGFKALARIATLCNRAEFKGGQEGVPIKKEVSGDASEAALLKCMELALGDV  
MSIRKRNKKVCEIPFNSTNKYQVSIHETEDASDPRHVMVMKGAPERILEKCSTIFIGGKE  
KLLDEEMKEAFNNAY  
>Locus\_1711\_Transcript\_10/11\_Confidence\_0.481\_Length\_4683|. |sp|  
P13607|ATNA\_DROME Sodium/potassium-transporting ATPase subunit alpha  
OS=Drosophila melanogaster GN=Atpalpha PE=1 SV=3|e=0|from=1147|  
to=4254|frame=-1|Fragment\_4  
GFCDLMLPTDKFPLGFKFSDDPNFIENLRFVGLMSMI  
>Locus\_1711\_Transcript\_10/11\_Confidence\_0.481\_Length\_4683|. |sp|  
P13607|ATNA\_DROME Sodium/potassium-transporting ATPase subunit alpha  
OS=Drosophila melanogaster GN=Atpalpha PE=1 SV=3|e=0|from=1147|  
to=4254|frame=-1|Fragment\_5  
AKCRSAGIKVIMVTGDHPITAKAIAKSVGIISEGNETVEDIAQRLNIPVSEVNPREAKAA  
VVHGTELRELNQDLDEILRYHTEIVFARTSPQKLIIVEGCQRMGAIVAVTGDGVNDSP  
ALKKADIGVAMGIAGSDVSKQAADMILLDDNFASIVTGVEEGRILFDNLKKSIAYT  
IPDISPFLAFILCDIPLPLGTVTILCIDLGTDMVPAISLAYEHAHADIMKRPPRDPVNDK  
LVNSRLISMAYGQIGMIQAAAGFFVYFVIMAENGLPMKLFGIRKQWDSKAVNDLTD  
SYGQEWYRDRKTLEYTCHTAFFVSIVVVQWADLIVCKTRRNSLLHQGMRNWALN  
FGLVFETALAAFLSYTPGMDKGLRMFPLKFWWLPALPFMISIFIYDETRRFYLR  
RNPGGWLEQETYY  
>Locus\_1711\_Transcript\_11/11\_Confidence\_0.519\_Length\_4683|. |sp|  
P13607|ATNA\_DROME Sodium/potassium-transporting ATPase subunit alpha  
OS=Drosophila melanogaster GN=Atpalpha PE=1 SV=3|e=0|from=1147|  
to=4254|frame=-1|Fragment\_1  
DDKHGRSDSYRVATV  
>Locus\_1711\_Transcript\_11/11\_Confidence\_0.519\_Length\_4683|. |sp|  
P13607|ATNA\_DROME Sodium/potassium-transporting ATPase subunit alpha  
OS=Drosophila melanogaster GN=Atpalpha PE=1 SV=3|e=0|from=1147|  
to=4254|frame=-1|Fragment\_2  
PTIDNLTADGQYSRRKTPTKKQRKEGELDDLKQELDIDFHKVSPEELYQRFNTHPENGL  
LSHAKAKENLERDGNALTPPKQTPEWVKFCKNLFGGFALLLWIGAILCFVAYSIAQASTV  
EEPADDNLYLGIVLAAVVIVTGIFSYQQESKSSKIMESFKNMVPQFATVLRGEKLT  
EDLVLGDVVEVKFGDRIPADIRIIESRQKVDNSSLTGESEPQSRGPEFTNENPLETKNL  
AFFSTNAVEGTAKGVVISCNDNTVMGRIAGLASGLDTGETPIAKEIHHFIHLITGVAVFL  
GVTFVIAIILNYHWDVAIFLIGIIVANVPEG  
>Locus\_1711\_Transcript\_11/11\_Confidence\_0.519\_Length\_4683|. |sp|  
P13607|ATNA\_DROME Sodium/potassium-transporting ATPase subunit alpha

OS=Drosophila melanogaster GN=Atpalpha PE=1 SV=3|e=0|from=1147|  
to=4254|frame=-1|Fragment\_3  
AKRMASKNCLVKNLEAVETLGSTSTICSDKTGTLTQNRMTVAHMWFDNQIIEADTTEDQS  
GVVYDRTSPGFKALARIATLCNRAEFKGGQEGVPILKKEVSGDASEAALLKCMELALGDV  
MSIRKRNKKVCEIPFNSTNKYQVSIHETEDASDPRHVMVMKGAPERILEKCSTIFIGGKE  
KLLDEEMKEAFNNAY  
>Locus\_1711\_Transcript\_11/11\_Confidence\_0.519\_Length\_4683|. |sp|  
P13607|ATNA\_DROME Sodium/potassium-transporting ATPase subunit alpha  
OS=Drosophila melanogaster GN=Atpalpha PE=1 SV=3|e=0|from=1147|  
to=4254|frame=-1|Fragment\_4  
GFCDLMLPTDKFPLGFKFDSDDPNFPIENLRFVGLMSMI  
>Locus\_1711\_Transcript\_11/11\_Confidence\_0.519\_Length\_4683|. |sp|  
P13607|ATNA\_DROME Sodium/potassium-transporting ATPase subunit alpha  
OS=Drosophila melanogaster GN=Atpalpha PE=1 SV=3|e=0|from=1147|  
to=4254|frame=-1|Fragment\_5  
AKCRSAGIKVIMVTGDHPITAKAIAKSVGIISEGNETVEDIAQRLNIPVSEVNPREAKAA  
VVHGTELRELNSDQLDEILRYHTEIVFARTSPQKLIIVEGCQRMGAIIVAVTGDGVNDSP  
ALKKADIGVAMGIAGSDVSKQAADMILLDDNFASIVTGVEEGRILFDNLKKSIAYTLLSN  
IPEISPLAFILCDIPLPLGTVTILCIDLGTDMVPAISLAYEHAHADIMKRPPRDPVNDK  
LVNSRLISMAYGQIGMIQAAAGFFVYFVIMAENGLPMKLFGIRKQWDSKAVNDLTDSYG  
QEWTYRDRKTLEYTCHTAFFVSIVVVQWADLIVCKTRRNSLLHQGMRNWALNFGLVFETA  
LAAFLSYTPGMDKGLRMFPLKFWWLPALPFMISIFIYDETRRFYLRRNPGGWLEQETYY  
>Locus\_1711\_Transcript\_7/11\_Confidence\_0.481\_Length\_4661|. |sp|  
P13607|ATNA\_DROME Sodium/potassium-transporting ATPase subunit alpha  
OS=Drosophila melanogaster GN=Atpalpha PE=1 SV=3|e=0|from=1125|  
to=4232|frame=-1|Fragment\_1  
DDKHGRSDSYRVATV  
>Locus\_1711\_Transcript\_7/11\_Confidence\_0.481\_Length\_4661|. |sp|  
P13607|ATNA\_DROME Sodium/potassium-transporting ATPase subunit alpha  
OS=Drosophila melanogaster GN=Atpalpha PE=1 SV=3|e=0|from=1125|  
to=4232|frame=-1|Fragment\_2  
PTIDDLTADGQYSRRKTPKKQRKEGELDDLKQELDIDFHKVSPEELYQRFNTHPENGL  
LSHAKAKENLERDGNALTPPKQTPPEWVKFCKNLFGGFALLLWIGAILCFVAYSIAQASTV  
EEPADDNLYLGIVLAAVVIVTGFIFSYYQESKSSKIMESFKNMVQFATVLRGEKLTLLRA  
EDLVLGDVVEVKFGDRIPADIRIIESRQKVDNSSLTGESEPQSRGPEFTNENPLETKNL  
AFFSTNAVEGTAKGVVISCNDNTVMGRIAGLASGLDTGETPIAKEIHHFIHLITGVAVFL  
GVTFVIAIILNYHWDVAIFLIGIIVANVPEG  
>Locus\_1711\_Transcript\_7/11\_Confidence\_0.481\_Length\_4661|. |sp|  
P13607|ATNA\_DROME Sodium/potassium-transporting ATPase subunit alpha  
OS=Drosophila melanogaster GN=Atpalpha PE=1 SV=3|e=0|from=1125|  
to=4232|frame=-1|Fragment\_3  
AKRMASKNCLVKNLEAVETLGSTSTICSDKTGTLTQNRMTVAHMWFDNQIIEADTTEDQS  
GVVYDRTSPGFKALARIATLCNRAEFKGGQEGVPILKKEVSGDASEAALLKCMELALGDV  
MSIRKRNKKVCEIPFNSTNKYQVSIHETEDASDPRHVMVMKGAPERILEKCSTIFIGGKE  
KLLDEEMKEAFNNAY  
>Locus\_1711\_Transcript\_7/11\_Confidence\_0.481\_Length\_4661|. |sp|  
P13607|ATNA\_DROME Sodium/potassium-transporting ATPase subunit alpha  
OS=Drosophila melanogaster GN=Atpalpha PE=1 SV=3|e=0|from=1125|  
to=4232|frame=-1|Fragment\_4  
GFCDLMLPTDKFPLGFKFDSDDPNFPIENLRFVGLMSMI  
>Locus\_1711\_Transcript\_7/11\_Confidence\_0.481\_Length\_4661|. |sp|  
P13607|ATNA\_DROME Sodium/potassium-transporting ATPase subunit alpha  
OS=Drosophila melanogaster GN=Atpalpha PE=1 SV=3|e=0|from=1125|  
to=4232|frame=-1|Fragment\_5

AKCRSAGIKVIMVTGDHPITAKAIAKSVGIISEGNETVEDIAQRLNIPVSEVNPREAKAA  
VVHGTELRELNQDLDEILRYHTEIVFARTSPQKLIIVEGCQRMGAIVAVTGDGVNDSP  
ALKKADIGVAMGIAGSDVSKQAADMILLDDNFASIVTGVEEGRLIFDNLKKSIAYTLSN  
IPEISPFILAFILCDIPLPLGTVTILCIDLGTDMVPAISLAYEHAADIMKRPPRDPVNDK  
LVNSRLISMAYGQIGMIQAAAGFFVYFVIMAENGFLPMKLFGIRKQWDSKAVNDLTDSYG  
QEWTYRDRKTLEYTCHTAFFVSIVVVQWADLIVCKTRRNSLLHQGMRNWALNFGLVFETA  
LAAFLSYTPGMDKGLRMFPLKFWVWLPALPFMISIFIYDETRRFYLRRNPGGWLEQETYY  
>Locus\_1711\_Transcript\_9/11\_Confidence\_0.519\_Length\_4623|. |sp|  
P13607|ATNA\_DROME Sodium/potassium-transporting ATPase subunit alpha  
OS=Drosophila melanogaster GN=Atpalpha PE=1 SV=3|e=0|from=1147|  
to=4254|frame=-1|Fragment\_1  
DDKHGRSDSYRVATV  
>Locus\_1711\_Transcript\_9/11\_Confidence\_0.519\_Length\_4623|. |sp|  
P13607|ATNA\_DROME Sodium/potassium-transporting ATPase subunit alpha  
OS=Drosophila melanogaster GN=Atpalpha PE=1 SV=3|e=0|from=1147|  
to=4254|frame=-1|Fragment\_2  
PTIDDLNLTADGQYSRRKTPKKQRKEGELDDLKQELDIDFHKVSPEELYQRFNTHPENGL  
LSHAKAKENLERDGNALTPPKQTPWVKFCKNLFGGFALLLWIGAILCFVAYSIAQASTV  
EEPADDNLYLGIVLAAVVIVTGIFSYQESKSSKIMESFKNMVQFATVLRGEKLTLLRA  
EDLVLGDVVEVKFGDRIPADIRIIESRGFKVDNSLTGESEPQSRGPEFTNENPLETKNL  
AFFSTNAVEGTAKGVVISCVDNTVMGRIAGLASGLDTGETPIAKEIHHFIHLITGVAVFL  
GVTFVIAIILNYHWDVAIFLIGIIVANVPEG  
>Locus\_1711\_Transcript\_9/11\_Confidence\_0.519\_Length\_4623|. |sp|  
P13607|ATNA\_DROME Sodium/potassium-transporting ATPase subunit alpha  
OS=Drosophila melanogaster GN=Atpalpha PE=1 SV=3|e=0|from=1147|  
to=4254|frame=-1|Fragment\_3  
AKRMAKNCLVKNLEAVETLGTSTICSDKTGTLTQNRMTVAHMWFDNQIIEADTTEDQS  
GVVYDRTSPGFKALARIATLCNRAEFKGGQEGVPIKKEVSGDASEAALLKCMELALGDV  
MSIRKRNKKVCEIPFNSTNKYQVSIHETEDASDPRHVMVMKGAPERILEKCSTIFIGGKE  
KLLDEEMKEAFNNAY  
>Locus\_1711\_Transcript\_9/11\_Confidence\_0.519\_Length\_4623|. |sp|  
P13607|ATNA\_DROME Sodium/potassium-transporting ATPase subunit alpha  
OS=Drosophila melanogaster GN=Atpalpha PE=1 SV=3|e=0|from=1147|  
to=4254|frame=-1|Fragment\_4  
GFCDLMLPTDKFPLGFKFSDDPNFIENLRFVGLMSMI  
>Locus\_1711\_Transcript\_9/11\_Confidence\_0.519\_Length\_4623|. |sp|  
P13607|ATNA\_DROME Sodium/potassium-transporting ATPase subunit alpha  
OS=Drosophila melanogaster GN=Atpalpha PE=1 SV=3|e=0|from=1147|  
to=4254|frame=-1|Fragment\_5  
AKCRSAGIKVIMVTGDHPITAKAIAKSVGIISEGNETVEDIAQRLNIPVSEVNPREAKAA  
VVHGTELRELNQDLDEILRYHTEIVFARTSPQKLIIVEGCQRMGAIVAVTGDGVNDSP  
ALKKADIGVAMGIAGSDVSKQAADMILLDDNFASIVTGVEEGRLIFDNLKKSIAYTLSN  
IPEISPFILAFILCDIPLPLGTVTILCIDLGTDMVPAISLAYEHAADIMKRPPRDPVNDK  
LVNSRLISMAYGQIGMIQAAAGFFVYFVIMAENGFLPMKLFGIRKQWDSKAVNDLTDSYG  
QEWTYRDRKTLEYTCHTAFFVSIVVVQWADLIVCKTRRNSLLHQGMRNWALNFGLVFETA  
LAAFLSYTPGMDKGLRMFPLKFWVWLPALPFMISIFIYDETRRFYLRRNPGGWLEQETYY  
>Locus\_1711\_Transcript\_8/11\_Confidence\_0.519\_Length\_4605|. |sp|  
P13607|ATNA\_DROME Sodium/potassium-transporting ATPase subunit alpha  
OS=Drosophila melanogaster GN=Atpalpha PE=1 SV=3|e=0|from=1147|  
to=4170|frame=-1|Fragment\_1  
KSRRKTPKKQRKEGELDDLKQELDIDFHKVSPEELYQRFNTHPENGLSHAKAKENLERD  
GNALTPPKQTPWVKFCKNLFGGFALLLWIGAILCFVAYSIAQASTVEEPADDNLYLGIV  
LAAVVIVTGIFSYQESKSSKIMESFKNMVQFATVLRGEKLTLLRAEDLVLGDVVEVKF  
GDRIPADIRIIESRGFKVDNSLTGESEPQSRGPEFTNENPLETKNLAFFSTNAVEGTAK

GVVISC GDNTVMGRIAGLASGLDTGETPIAKEIHHFIHLITGVAVFLGVTFFVIAIILNY  
HWLDAVIFLIGIIVANVPEG  
>Locus\_1711\_Transcript\_8/11\_Confidence\_0.519\_Length\_4605|. |sp|  
P13607|ATNA\_DROME Sodium/potassium-transporting ATPase subunit alpha  
OS=Drosophila melanogaster GN=Atpalpha PE=1 SV=3|e=0|from=1147|  
to=4170|frame=-1|Fragment\_2  
AKRMASKNCLVKNLEAVETLGSTSTICSDKTGTLTQNRMTVAHMWFDNQIIEADTTEDQS  
GVVYDRTSPGFKALARIATLCNRAEFKGGQEGVPILKKEVSGDASEAALLKCMELALGDV  
MSIRKRNKKVCEIPFNSTNKYQVSIHETEDASDPRHVMVMKGAPERILEKCSTIFIGGKE  
KLLDEEMKEAFNNAY  
>Locus\_1711\_Transcript\_8/11\_Confidence\_0.519\_Length\_4605|. |sp|  
P13607|ATNA\_DROME Sodium/potassium-transporting ATPase subunit alpha  
OS=Drosophila melanogaster GN=Atpalpha PE=1 SV=3|e=0|from=1147|  
to=4170|frame=-1|Fragment\_3  
GFCDLMLPTDKFPLGFKFSDDDPNFPIENLRFVGLMSMI  
>Locus\_1711\_Transcript\_8/11\_Confidence\_0.519\_Length\_4605|. |sp|  
P13607|ATNA\_DROME Sodium/potassium-transporting ATPase subunit alpha  
OS=Drosophila melanogaster GN=Atpalpha PE=1 SV=3|e=0|from=1147|  
to=4170|frame=-1|Fragment\_4  
AKCRSAGIKVIMVTGDHPITAKAIAKSVGIIEGNETVEDIAQRLNIPVSEVNPREAKAA  
VVHGTRELNSDQLDEILRYHTEIVFARTSPQKLIIVEGCQRMGAIVAVTGDGVNDSP  
ALKKADIGVAMGIAGSDVSKQAADMILLDDNFASIVTGVEEGRLIFDNLKKSIAYTTLTSN  
IPEISPLAFILCDIPLPLGTVTILCIDLGTDMVPAISLAYEHAHADIMKRPPRDPVNDK  
LVNSRLISMAYGQIGMIQAAAGFFVYFVIMAENGLPMKLFGIRKQWDSKAVNDLTD SYG  
QEWYRDRKTLEYTCHTAFFVSIVVVQWADLIVCKTRRNSLLHQGMRNWALNFGLVFETA  
LAAFLSYTPGMDKGLRMFPLKFWWLPALPFMISIFIYDETRRFYLRRNPGGWLEQETYY  
>Locus\_1711\_Transcript\_2/11\_Confidence\_0.222\_Length\_3271|. |sp|  
P13607|ATNA\_DROME Sodium/potassium-transporting ATPase subunit alpha  
OS=Drosophila melanogaster GN=Atpalpha PE=1 SV=3|e=0|from=260|  
to=2842|frame=-1|Fragment\_1  
DDKHGRSDSYRVATV  
>Locus\_1711\_Transcript\_2/11\_Confidence\_0.222\_Length\_3271|. |sp|  
P13607|ATNA\_DROME Sodium/potassium-transporting ATPase subunit alpha  
OS=Drosophila melanogaster GN=Atpalpha PE=1 SV=3|e=0|from=260|  
to=2842|frame=-1|Fragment\_2  
PTIDNLTADGQYSRRKTPTKKQRKEGELDDLKQELDIDFHKVSPEELYQRFNTHPENG  
LSHAKAKENLERDGPNALTPPKQTPPEWVKFCKNLFGGFALLLWIGAILCFVAYS IQASTV  
EEPADDNLYLGIVLAAVVIVTGIIFSYYQESKSSKIMESFKNMVPQFATVLRGEKLT LRA  
EDLVLGDVVEVKFGDRIPADIRIIESRGFKVDNSSLTGESEPQSRGPEFTNENPLETKNL  
AFFSTNAVEGTAKGVVISC GDNTVMGRIAGLASGLDTGETPIAKEIHHFIHLITGVAVFL  
GVTFFVIAIILNYHWLDAVIFLIGIIVANVPEG  
>Locus\_1711\_Transcript\_2/11\_Confidence\_0.222\_Length\_3271|. |sp|  
P13607|ATNA\_DROME Sodium/potassium-transporting ATPase subunit alpha  
OS=Drosophila melanogaster GN=Atpalpha PE=1 SV=3|e=0|from=260|  
to=2842|frame=-1|Fragment\_3  
AKRMASKNCLVKNLEAVETLGSTSTICSDKTGTLTQNRMTVAHMWFDNQIIEADTTEDQS  
GVVYDRTSPGFKALARIATLCNRAEFKGGQEGVPILKKEVSGDASEAALLKCMELALGDV  
MSIRKRNKKVCEIPFNSTNKYQVSIHETEDASDPRHVMVMKGAPERILEKCSTIFIGGKE  
KLLDEEMKEAFNNAY  
>Locus\_1711\_Transcript\_2/11\_Confidence\_0.222\_Length\_3271|. |sp|  
P13607|ATNA\_DROME Sodium/potassium-transporting ATPase subunit alpha  
OS=Drosophila melanogaster GN=Atpalpha PE=1 SV=3|e=0|from=260|  
to=2842|frame=-1|Fragment\_4  
GFCDLMLPTDKFPLGFKFSDDDPNFPIENLRFVGLMSMI

>Locus\_1711\_Transcript\_2/11\_Confidence\_0.222\_Length\_3271|. |sp| P13607|ATNA\_DROME Sodium/potassium-transporting ATPase subunit alpha OS=Drosophila melanogaster GN=Atpalpha PE=1 SV=3|e=0|from=260|to=2842|frame=-1|Fragment\_5  
AKCRSAGIKVIMVTGDHPITAKAIAKSVGIISEGNETVEDIAQRLNIPVSEVNPREAKAA  
VVHGTELRELNSDQLDEILRYHTEIVFARTSPQKLIIVEGCQRMGAIVAVTGDGVNDSP  
ALKKADIGVAMGIAGSDVSKQAADMILLDDNFASIVTGVEEGRLIFDNLKKSIAYTLSN  
IPEISPFLAFILCDIPLPLGTVTILCIDLGTDMVPAISLAYEESESDIMKRRPRNPYSK  
LVNER

>Locus\_4333\_Transcript\_2/5\_Confidence\_0.615\_Length\_3375|UNIGENE REPRESENTATIVE TRANSCRIPT|sp|P14599|A4\_DROME Beta-amyloid-like protein OS=Drosophila melanogaster GN=Appl PE=1 SV=2|e=7.9105E-130|from=765|to=2234|frame=-2|Fragment\_1  
TSTQAPPSAQTP

>Locus\_4333\_Transcript\_2/5\_Confidence\_0.615\_Length\_3375|UNIGENE REPRESENTATIVE TRANSCRIPT|sp|P14599|A4\_DROME Beta-amyloid-like protein OS=Drosophila melanogaster GN=Appl PE=1 SV=2|e=7.9105E-130|from=765|to=2234|frame=-2|Fragment\_2  
DPYFTHFDPRVEHQNYKEAQRLEETHREKVTKVMKDWSDLEERYQDMRLADPRAAQGFK  
RRMTARFQASVQALEEQGEAEKRQLAAMHQQRVLAHINQRRKEAMACYTQALTDQPPNTH  
RVQKCLQKLLRALHKDR

>Locus\_4333\_Transcript\_2/5\_Confidence\_0.615\_Length\_3375|UNIGENE REPRESENTATIVE TRANSCRIPT|sp|P14599|A4\_DROME Beta-amyloid-like protein OS=Drosophila melanogaster GN=Appl PE=1 SV=2|e=7.9105E-130|from=765|to=2234|frame=-2|Fragment\_3  
RPRTLRLVDIDRAVNQSMQMLRRYPELADKIGQLMDDYIQALRSKDETPGSMLAMTEDA  
EIAILDKYRTEVERKLAEKERQLFEKQRKEQSRARAELRQEKMRSEARHELTAKVAV  
TEEQT

>Locus\_4333\_Transcript\_2/5\_Confidence\_0.615\_Length\_3375|UNIGENE REPRESENTATIVE TRANSCRIPT|sp|P14599|A4\_DROME Beta-amyloid-like protein OS=Drosophila melanogaster GN=Appl PE=1 SV=2|e=7.9105E-130|from=765|to=2234|frame=-2|Fragment\_4  
STQRPLVAAQHNSGVVDDAAV

>Locus\_4333\_Transcript\_2/5\_Confidence\_0.615\_Length\_3375|UNIGENE REPRESENTATIVE TRANSCRIPT|sp|P14599|A4\_DROME Beta-amyloid-like protein OS=Drosophila melanogaster GN=Appl PE=1 SV=2|e=7.9105E-130|from=765|to=2234|frame=-2|Fragment\_5  
QRAVEQVA

>Locus\_4333\_Transcript\_2/5\_Confidence\_0.615\_Length\_3375|UNIGENE REPRESENTATIVE TRANSCRIPT|sp|P14599|A4\_DROME Beta-amyloid-like protein OS=Drosophila melanogaster GN=Appl PE=1 SV=2|e=7.9105E-130|from=765|to=2234|frame=-2|Fragment\_6  
LQRQTEARASHAMTHDLGHGEPGYSLRTHDLFTPSGRLGEGRSVYFT

>Locus\_4333\_Transcript\_2/5\_Confidence\_0.615\_Length\_3375|UNIGENE REPRESENTATIVE TRANSCRIPT|sp|P14599|A4\_DROME Beta-amyloid-like protein OS=Drosophila melanogaster GN=Appl PE=1 SV=2|e=7.9105E-130|from=765|to=2234|frame=-2|Fragment\_7  
ARSPGAQGFVEVDQGGTVPVPVTPEERHVANMQVNGYENPTYKYFEVKE

>Locus\_4333\_Transcript\_3/5\_Confidence\_0.538\_Length\_3375|. |sp|P14599| A4\_DROME Beta-amyloid-like protein OS=Drosophila melanogaster GN=Appl PE=1 SV=2|e=7.9105E-130|from=765|to=2234|frame=-2|Fragment\_1  
TSTQAPPSAQTP

>Locus\_4333\_Transcript\_3/5\_Confidence\_0.538\_Length\_3375|. |sp|P14599| A4\_DROME Beta-amyloid-like protein OS=Drosophila melanogaster

GN=Appl PE=1 SV=2|e=7.9105E-130|from=765|to=2234|frame=-2|Fragment\_2  
DPYFTHFDPRVEHQNYKEAQRLEETHREKVTKVMKDWSDLEERYQDMRLADPRAAQGFK  
RRMTARFQASVQALEEQGEAEKRQLAAMHQQRVLAHINQRRKEAMACYTQALTDQPPNTH  
RVQKCLQKLLRALHKDR

>Locus\_4333\_Transcript\_3/5\_Confidence\_0.538\_Length\_3375|. |sp|P14599|  
A4\_DROME Beta-amyloid-like protein OS=Drosophila melanogaster  
GN=Appl PE=1 SV=2|e=7.9105E-130|from=765|to=2234|frame=-2|Fragment\_3  
RPRTLRLVDIDRAVNQSMQMLRRYPELADKIGQLMDDYIQALRSKDETPGSMLAMTEDA  
EIAILDKYRTEVERKLAEKERQRLFQKQKEQSRARAELRQEKMRSEARHELTAKVAV  
TEEQT

>Locus\_4333\_Transcript\_3/5\_Confidence\_0.538\_Length\_3375|. |sp|P14599|  
A4\_DROME Beta-amyloid-like protein OS=Drosophila melanogaster  
GN=Appl PE=1 SV=2|e=7.9105E-130|from=765|to=2234|frame=-2|Fragment\_4  
STQRPLVAAQHNSGVVDDAAV

>Locus\_4333\_Transcript\_3/5\_Confidence\_0.538\_Length\_3375|. |sp|P14599|  
A4\_DROME Beta-amyloid-like protein OS=Drosophila melanogaster  
GN=Appl PE=1 SV=2|e=7.9105E-130|from=765|to=2234|frame=-2|Fragment\_5  
QRAVEQVA

>Locus\_4333\_Transcript\_3/5\_Confidence\_0.538\_Length\_3375|. |sp|P14599|  
A4\_DROME Beta-amyloid-like protein OS=Drosophila melanogaster  
GN=Appl PE=1 SV=2|e=7.9105E-130|from=765|to=2234|frame=-2|Fragment\_6  
LQRQTEARASHAMTHDLGHGEPGYSLRTHDLFTPSGRLGEGRSVYFT

>Locus\_4333\_Transcript\_3/5\_Confidence\_0.538\_Length\_3375|. |sp|P14599|  
A4\_DROME Beta-amyloid-like protein OS=Drosophila melanogaster  
GN=Appl PE=1 SV=2|e=7.9105E-130|from=765|to=2234|frame=-2|Fragment\_7  
ARSPGAQGFVEVDQCGTVPVPVTPEERHVANMQVNGYENPTYKYFEVKE

>Locus\_4333\_Transcript\_5/5\_Confidence\_0.538\_Length\_3375|. |sp|P14599|  
A4\_DROME Beta-amyloid-like protein OS=Drosophila melanogaster  
GN=Appl PE=1 SV=2|e=7.9105E-130|from=765|to=2234|frame=-2|Fragment\_1  
TSTQAPPSAQTP

>Locus\_4333\_Transcript\_5/5\_Confidence\_0.538\_Length\_3375|. |sp|P14599|  
A4\_DROME Beta-amyloid-like protein OS=Drosophila melanogaster  
GN=Appl PE=1 SV=2|e=7.9105E-130|from=765|to=2234|frame=-2|Fragment\_2  
DPYFTHFDPRVEHQNYKEAQRLEETHREKVTKVMKDWSDLEERYQDMRLADPRAAQGFK  
RRMTARFQASVQALEEQGEAEKRQLAAMHQQRVLAHINQRRKEAMACYTQALTDQPPNTH  
RVQKCLQKLLRALHKDR

>Locus\_4333\_Transcript\_5/5\_Confidence\_0.538\_Length\_3375|. |sp|P14599|  
A4\_DROME Beta-amyloid-like protein OS=Drosophila melanogaster  
GN=Appl PE=1 SV=2|e=7.9105E-130|from=765|to=2234|frame=-2|Fragment\_3  
RPRTLRLVDIDRAVNQSMQMLRRYPELADKIGQLMDDYIQALRSKDETPGSMLAMTEDA  
EIAILDKYRTEVERKLAEKERQRLFQKQKEQSRARAELRQEKMRSEARHELTAKVAV  
TEEQT

>Locus\_4333\_Transcript\_5/5\_Confidence\_0.538\_Length\_3375|. |sp|P14599|  
A4\_DROME Beta-amyloid-like protein OS=Drosophila melanogaster  
GN=Appl PE=1 SV=2|e=7.9105E-130|from=765|to=2234|frame=-2|Fragment\_4  
STQRPLVAAQHNSGVVDDAAV

>Locus\_4333\_Transcript\_5/5\_Confidence\_0.538\_Length\_3375|. |sp|P14599|  
A4\_DROME Beta-amyloid-like protein OS=Drosophila melanogaster  
GN=Appl PE=1 SV=2|e=7.9105E-130|from=765|to=2234|frame=-2|Fragment\_5  
QRAVEQVA

>Locus\_4333\_Transcript\_5/5\_Confidence\_0.538\_Length\_3375|. |sp|P14599|  
A4\_DROME Beta-amyloid-like protein OS=Drosophila melanogaster  
GN=Appl PE=1 SV=2|e=7.9105E-130|from=765|to=2234|frame=-2|Fragment\_6  
LQRQTEARASHAMTHDLGHGEPGYSLRTHDLFTPSGRLGEGRSVYFT

>Locus\_4333\_Transcript\_5/5\_Confidence\_0.538\_Length\_3375|. |sp|P14599|  
A4\_DROME Beta-amyloid-like protein OS=Drosophila melanogaster  
GN=Appl PE=1 SV=2|e=7.9105E-130|from=765|to=2234|frame=-2|Fragment\_7  
ARSPGAQGFVEVDQGGTVPVPVTPEERHVANMQVNGYENPTYKYFEVKE

>Locus\_4333\_Transcript\_4/5\_Confidence\_0.538\_Length\_3375|. |sp|P14599|  
A4\_DROME Beta-amyloid-like protein OS=Drosophila melanogaster  
GN=Appl PE=1 SV=2|e=2.5447E-128|from=765|to=2204|frame=-2|Fragment\_1  
TPDPYFTHFDPRVEHQNYKEAQRLEETHREKVTKVMKDWSDLEERYQDMRLADPRAAQG  
FKRRMTARFQASVQALEEQGEAEKRQLAAMHQQRVLAHINQRRKEAMACYTQALTDQPPN  
THRQKCLQKLLRALHKDR

>Locus\_4333\_Transcript\_4/5\_Confidence\_0.538\_Length\_3375|. |sp|P14599|  
A4\_DROME Beta-amyloid-like protein OS=Drosophila melanogaster  
GN=Appl PE=1 SV=2|e=2.5447E-128|from=765|to=2204|frame=-2|Fragment\_2  
RPRTLRLVDIDRAVNQSMQLRRYPELADKIGQLMDDYIQALRSKDETPGSMAMTEDA  
EIAILDKYRTEVERKLAEKERQLFEKQRKEQRSRARAEELRQEKMRSEARHELTAKVAV  
TEEQT

>Locus\_4333\_Transcript\_4/5\_Confidence\_0.538\_Length\_3375|. |sp|P14599|  
A4\_DROME Beta-amyloid-like protein OS=Drosophila melanogaster  
GN=Appl PE=1 SV=2|e=2.5447E-128|from=765|to=2204|frame=-2|Fragment\_3  
STQRPLVAAQHNSGVVDDAAV

>Locus\_4333\_Transcript\_4/5\_Confidence\_0.538\_Length\_3375|. |sp|P14599|  
A4\_DROME Beta-amyloid-like protein OS=Drosophila melanogaster  
GN=Appl PE=1 SV=2|e=2.5447E-128|from=765|to=2204|frame=-2|Fragment\_4  
QRAVEQVA

>Locus\_4333\_Transcript\_4/5\_Confidence\_0.538\_Length\_3375|. |sp|P14599|  
A4\_DROME Beta-amyloid-like protein OS=Drosophila melanogaster  
GN=Appl PE=1 SV=2|e=2.5447E-128|from=765|to=2204|frame=-2|Fragment\_5  
LQRQTEARASHAMTHDLGHGEPGYSLRTHDLFTPSGRLGEGRSVYFT

>Locus\_4333\_Transcript\_4/5\_Confidence\_0.538\_Length\_3375|. |sp|P14599|  
A4\_DROME Beta-amyloid-like protein OS=Drosophila melanogaster  
GN=Appl PE=1 SV=2|e=2.5447E-128|from=765|to=2204|frame=-2|Fragment\_6  
ARSPGAQGFVEVDQGGTVPVPVTPEERHVANMQVNGYENPTYKYFEVKE

>Locus\_4333\_Transcript\_2/5\_Confidence\_0.615\_Length\_3375|. |sp|P14599|  
A4\_DROME Beta-amyloid-like protein OS=Drosophila melanogaster  
GN=Appl PE=1 SV=2|e=5.19928E-81|from=2574|to=3131|frame=-2|  
Fragment\_1  
RWEPQVAVLCPDQGYHPQHLADDGRWTADLTAKPPRGSACLRDKMDILEHCKKVYPNRD  
ITNIVESHYLVKSWGCRGATNQAACKAA

>Locus\_4333\_Transcript\_2/5\_Confidence\_0.615\_Length\_3375|. |sp|P14599|  
A4\_DROME Beta-amyloid-like protein OS=Drosophila melanogaster  
GN=Appl PE=1 SV=2|e=5.19928E-81|from=2574|to=3131|frame=-2|  
Fragment\_2  
RWVKPFRCLGEPFQSDALLVPEGCLFDHIHNQSHCWQFSRWNQTGARACSERGLQLRSFA  
MLLPCGISLFSGVEFVCCPKHYK

>Locus\_4333\_Transcript\_2/5\_Confidence\_0.615\_Length\_3375|. |sp|P14599|  
A4\_DROME Beta-amyloid-like protein OS=Drosophila melanogaster  
GN=Appl PE=1 SV=2|e=5.19928E-81|from=2574|to=3131|frame=-2|  
Fragment\_3  
DNSRVKKIDLPAM

>Locus\_4333\_Transcript\_3/5\_Confidence\_0.538\_Length\_3375|. |sp|P14599|  
A4\_DROME Beta-amyloid-like protein OS=Drosophila melanogaster  
GN=Appl PE=1 SV=2|e=5.19928E-81|from=2574|to=3131|frame=-2|  
Fragment\_1  
RWEPQVAVLCPDQGYHPQHLADDGRWTADLTAKPPRGSACLRDKMDILEHCKKVYPNRD

ITNIVESHYLVKSGWCRLGATNQAKCKAA

>Locus\_4333\_Transcript\_3/5\_Confidence\_0.538\_Length\_3375|. |sp|P14599|  
A4\_DROME Beta-amyloid-like protein OS=Drosophila melanogaster  
GN=Appl PE=1 SV=2|e=5.19928E-81|from=2574|to=3131|frame=-2|

Fragment\_2

RWVKPFRCLGPFQSDALLVPEGCLFDHIHNQSHCWQFSRWNQTGARACSERGLQLRSFA  
MLLPCGISLFSGVFVCCPKHYK

>Locus\_4333\_Transcript\_3/5\_Confidence\_0.538\_Length\_3375|. |sp|P14599|  
A4\_DROME Beta-amyloid-like protein OS=Drosophila melanogaster  
GN=Appl PE=1 SV=2|e=5.19928E-81|from=2574|to=3131|frame=-2|

Fragment\_3

DNSRVKKIDLPAM

>Locus\_4333\_Transcript\_4/5\_Confidence\_0.538\_Length\_3375|. |sp|P14599|  
A4\_DROME Beta-amyloid-like protein OS=Drosophila melanogaster  
GN=Appl PE=1 SV=2|e=5.19928E-81|from=2574|to=3131|frame=-2|

Fragment\_1

RWEPQVAVLCPDGPQGYHPQHLADDGRWTADLTAKPPRGSACLRDKMDILEHCKKVYPNRD  
ITNIVESHYLVKSGWCRLGATNQAKCKAA

>Locus\_4333\_Transcript\_4/5\_Confidence\_0.538\_Length\_3375|. |sp|P14599|  
A4\_DROME Beta-amyloid-like protein OS=Drosophila melanogaster  
GN=Appl PE=1 SV=2|e=5.19928E-81|from=2574|to=3131|frame=-2|

Fragment\_2

RWVKPFRCLGPFQSDALLVPEGCLFDHIHNQSHCWQFSRWNQTGARACSERGLQLRSFA  
MLLPCGISLFSGVFVCCPKHYK

>Locus\_4333\_Transcript\_4/5\_Confidence\_0.538\_Length\_3375|. |sp|P14599|  
A4\_DROME Beta-amyloid-like protein OS=Drosophila melanogaster  
GN=Appl PE=1 SV=2|e=5.19928E-81|from=2574|to=3131|frame=-2|

Fragment\_3

DNSRVKKIDLPAM

>Locus\_4333\_Transcript\_5/5\_Confidence\_0.538\_Length\_3375|. |sp|P14599|  
A4\_DROME Beta-amyloid-like protein OS=Drosophila melanogaster  
GN=Appl PE=1 SV=2|e=5.19928E-81|from=2574|to=3131|frame=-2|

Fragment\_1

RWEPQVAVLCPDGPQGYHPQHLADDGRWTADLTAKPPRGSACLRDKMDILEHCKKVYPNRD  
ITNIVESHYLVKSGWCRLGATNQAKCKAA

>Locus\_4333\_Transcript\_5/5\_Confidence\_0.538\_Length\_3375|. |sp|P14599|  
A4\_DROME Beta-amyloid-like protein OS=Drosophila melanogaster  
GN=Appl PE=1 SV=2|e=5.19928E-81|from=2574|to=3131|frame=-2|

Fragment\_2

RWVKPFRCLGPFQSDALLVPEGCLFDHIHNQSHCWQFSRWNQTGARACSERGLQLRSFA  
MLLPCGISLFSGVFVCCPKHYK

>Locus\_4333\_Transcript\_5/5\_Confidence\_0.538\_Length\_3375|. |sp|P14599|  
A4\_DROME Beta-amyloid-like protein OS=Drosophila melanogaster  
GN=Appl PE=1 SV=2|e=5.19928E-81|from=2574|to=3131|frame=-2|

Fragment\_3

DNSRVKKIDLPAM

>Locus\_4333\_Transcript\_1/5\_Confidence\_0.538\_Length\_2663|. |sp|P14599|  
A4\_DROME Beta-amyloid-like protein OS=Drosophila melanogaster  
GN=Appl PE=1 SV=2|e=6.0976E-130|from=765|to=2234|frame=-1|Fragment\_1

TSTQAPPSAQTP

>Locus\_4333\_Transcript\_1/5\_Confidence\_0.538\_Length\_2663|. |sp|P14599|  
A4\_DROME Beta-amyloid-like protein OS=Drosophila melanogaster  
GN=Appl PE=1 SV=2|e=6.0976E-130|from=765|to=2234|frame=-1|Fragment\_2

DPYFTHFDPRVEHQNYKEAQRLEETHREKVTKVMKDWSDLEERYQDMRLADPRAAQGFK

RRMTARFQASVQALEEQGEAEKRQLAAMHQQRVLAHINQRRKEAMACYTQALTDQPPNTH  
RVQKCLQKLLRALHKDR  
>Locus\_4333\_Transcript\_1/5\_Confidence\_0.538\_Length\_2663|. |sp|P14599|  
A4\_DROME Beta-amyloid-like protein OS=Drosophila melanogaster  
GN=Appl PE=1 SV=2|e=6.0976E-130|from=765|to=2234|frame=-1|Fragment\_3  
RPRTLRLVDIDRAVNQSMQMLRRYPPELADKIGQLMDDYIQALRSKDETPGSMLAMTEDA  
EIAILDKYRTEVERKLAEKERQRLFQKQKEQSRARAELRQEKMRSEAARHELTAKVAV  
TEEQT  
>Locus\_4333\_Transcript\_1/5\_Confidence\_0.538\_Length\_2663|. |sp|P14599|  
A4\_DROME Beta-amyloid-like protein OS=Drosophila melanogaster  
GN=Appl PE=1 SV=2|e=6.0976E-130|from=765|to=2234|frame=-1|Fragment\_4  
STQRPLVAAQHNSGVVDDAAV  
>Locus\_4333\_Transcript\_1/5\_Confidence\_0.538\_Length\_2663|. |sp|P14599|  
A4\_DROME Beta-amyloid-like protein OS=Drosophila melanogaster  
GN=Appl PE=1 SV=2|e=6.0976E-130|from=765|to=2234|frame=-1|Fragment\_5  
QRAVEQVA  
>Locus\_4333\_Transcript\_1/5\_Confidence\_0.538\_Length\_2663|. |sp|P14599|  
A4\_DROME Beta-amyloid-like protein OS=Drosophila melanogaster  
GN=Appl PE=1 SV=2|e=6.0976E-130|from=765|to=2234|frame=-1|Fragment\_6  
LQRQTEARASHAMTHDLGHGEPGYSLRTHDLFTPSGRLGEGRSVYFT  
>Locus\_4333\_Transcript\_1/5\_Confidence\_0.538\_Length\_2663|. |sp|P14599|  
A4\_DROME Beta-amyloid-like protein OS=Drosophila melanogaster  
GN=Appl PE=1 SV=2|e=6.0976E-130|from=765|to=2234|frame=-1|Fragment\_7  
ARSPGAQGFVEVDQGGCTVVPVPTPEERHVANMQVNGYENPTYKYFEVKE

>Locus\_6862\_Transcript\_1/3\_Confidence\_0.714\_Length\_3370|UNIGENE  
REPRESENTATIVE TRANSCRIPT|sp|P14773|HMDH\_DROME 3-hydroxy-3-  
methylglutaryl-coenzyme A reductase OS=Drosophila melanogaster  
GN=Hmgcr PE=2 SV=2|e=0|from=496|to=3111|frame=-2|Fragment\_1  
MVGRLFRAHGFCASHPWEVIV

>Locus\_6862\_Transcript\_1/3\_Confidence\_0.714\_Length\_3370|UNIGENE  
REPRESENTATIVE TRANSCRIPT|sp|P14773|HMDH\_DROME 3-hydroxy-3-  
methylglutaryl-coenzyme A reductase OS=Drosophila melanogaster  
GN=Hmgcr PE=2 SV=2|e=0|from=496|to=3111|frame=-2|Fragment\_2  
LDRG

>Locus\_6862\_Transcript\_1/3\_Confidence\_0.714\_Length\_3370|UNIGENE  
REPRESENTATIVE TRANSCRIPT|sp|P14773|HMDH\_DROME 3-hydroxy-3-  
methylglutaryl-coenzyme A reductase OS=Drosophila melanogaster  
GN=Hmgcr PE=2 SV=2|e=0|from=496|to=3111|frame=-2|Fragment\_3  
VPAGPGTVSPLARHCG

>Locus\_6862\_Transcript\_1/3\_Confidence\_0.714\_Length\_3370|UNIGENE  
REPRESENTATIVE TRANSCRIPT|sp|P14773|HMDH\_DROME 3-hydroxy-3-  
methylglutaryl-coenzyme A reductase OS=Drosophila melanogaster  
GN=Hmgcr PE=2 SV=2|e=0|from=496|to=3111|frame=-2|Fragment\_4  
AWRGGSCPVP

>Locus\_6862\_Transcript\_1/3\_Confidence\_0.714\_Length\_3370|UNIGENE  
REPRESENTATIVE TRANSCRIPT|sp|P14773|HMDH\_DROME 3-hydroxy-3-  
methylglutaryl-coenzyme A reductase OS=Drosophila melanogaster  
GN=Hmgcr PE=2 SV=2|e=0|from=496|to=3111|frame=-2|Fragment\_5  
GGPQQTAT

>Locus\_6862\_Transcript\_1/3\_Confidence\_0.714\_Length\_3370|UNIGENE  
REPRESENTATIVE TRANSCRIPT|sp|P14773|HMDH\_DROME 3-hydroxy-3-  
methylglutaryl-coenzyme A reductase OS=Drosophila melanogaster  
GN=Hmgcr PE=2 SV=2|e=0|from=496|to=3111|frame=-2|Fragment\_6

DAEYNAADVILMTIIRCSAVLYSYYQFCNLHKLKSGYILAIAGLFT  
>Locus\_6862\_Transcript\_1/3\_Confidence\_0.714\_Length\_3370|UNIGENE  
REPRESENTATIVE TRANSCRIPT|sp|P14773|HMDH\_DROME 3-hydroxy-3-  
methylglutaryl-coenzyme A reductase OS=Drosophila melanogaster  
GN=Hmgcr PE=2 SV=2|e=0|from=496|to=3111|frame=-2|Fragment\_7  
VINFLRSDIS  
>Locus\_6862\_Transcript\_1/3\_Confidence\_0.714\_Length\_3370|UNIGENE  
REPRESENTATIVE TRANSCRIPT|sp|P14773|HMDH\_DROME 3-hydroxy-3-  
methylglutaryl-coenzyme A reductase OS=Drosophila melanogaster  
GN=Hmgcr PE=2 SV=2|e=0|from=496|to=3111|frame=-2|Fragment\_8  
AEVTQNIARGMSLLGPTITLDTLVEALVIGVGTLSGVPRLVLCFFACLSVLVNYVVFMT  
FYPACLSLILELSRTGEGSNLGRGEA  
>Locus\_6862\_Transcript\_1/3\_Confidence\_0.714\_Length\_3370|UNIGENE  
REPRESENTATIVE TRANSCRIPT|sp|P14773|HMDH\_DROME 3-hydroxy-3-  
methylglutaryl-coenzyme A reductase OS=Drosophila melanogaster  
GN=Hmgcr PE=2 SV=2|e=0|from=496|to=3111|frame=-2|Fragment\_9  
LLAKALHEEDQKPNPVVQRVKVIMSVGLMIVHAHSRWSLQDGGDHDGPAAPLVGSEQHRT  
MTQNRTEETSLPGHLMRWMAVGAEQ  
>Locus\_6862\_Transcript\_1/3\_Confidence\_0.714\_Length\_3370|UNIGENE  
REPRESENTATIVE TRANSCRIPT|sp|P14773|HMDH\_DROME 3-hydroxy-3-  
methylglutaryl-coenzyme A reductase OS=Drosophila melanogaster  
GN=Hmgcr PE=2 SV=2|e=0|from=496|to=3111|frame=-2|Fragment\_10  
VKFIFEDNQQLAGQLRMSSESENTDNSNATTMRDRERERP  
>Locus\_6862\_Transcript\_1/3\_Confidence\_0.714\_Length\_3370|UNIGENE  
REPRESENTATIVE TRANSCRIPT|sp|P14773|HMDH\_DROME 3-hydroxy-3-  
methylglutaryl-coenzyme A reductase OS=Drosophila melanogaster  
GN=Hmgcr PE=2 SV=2|e=0|from=496|to=3111|frame=-2|Fragment\_11  
IFGIGDEATEDKATQVTMIEESQSNEVEVEPEPRSLDVCLEIYRSER  
>Locus\_6862\_Transcript\_1/3\_Confidence\_0.714\_Length\_3370|UNIGENE  
REPRESENTATIVE TRANSCRIPT|sp|P14773|HMDH\_DROME 3-hydroxy-3-  
methylglutaryl-coenzyme A reductase OS=Drosophila melanogaster  
GN=Hmgcr PE=2 SV=2|e=0|from=496|to=3111|frame=-2|Fragment\_12  
GAAALTDAEVALLVRA  
>Locus\_6862\_Transcript\_1/3\_Confidence\_0.714\_Length\_3370|UNIGENE  
REPRESENTATIVE TRANSCRIPT|sp|P14773|HMDH\_DROME 3-hydroxy-3-  
methylglutaryl-coenzyme A reductase OS=Drosophila melanogaster  
GN=Hmgcr PE=2 SV=2|e=0|from=496|to=3111|frame=-2|Fragment\_13  
RHIPLYRIEAAVGDDEKRVKLRRLTSEGLFSDTALRDLPLYLDYDYSRVMNACCENVLG  
YVQVPVGFAGPLLLDGRKYYVPMATTEGALVASTNRGCKALLARGVNSVVEDVGMTRAPC  
IRFPTVRRADCAKNWLERANFEAVKASFDSTSRFARLQEIYVGMGDPQLYVFRATTGD  
AMGMNMVSKGAEMALRHVQKVPDMEIVSLSGNYCSDKKPAAINWIKGRGKRVVCDVAVIP  
GTVLSSVFRTNAATLVRCNKLKNMVGTSLAGSIGGNAHAANMVTAFIATGQDPAQNV  
SSNCSTGMEVCGDNEDLYMTCTMPSLEVGTIGGGTVLPGQACLEMLGVKGAHPAQPAE  
NAKSLARIICATVMAGELSLAALVNSDLVRSRHRHRSSVAVNPGLNNSSESSTVS  
>Locus\_6862\_Transcript\_2/3\_Confidence\_0.714\_Length\_3370|. |sp|P14773|  
HMDH\_DROME 3-hydroxy-3-methylglutaryl-coenzyme A reductase  
OS=Drosophila melanogaster GN=Hmgcr PE=2 SV=2|e=0|from=496|to=3111|  
frame=-2|Fragment\_1  
MVGRLFRAHGFEFCASHPWEVIV  
>Locus\_6862\_Transcript\_2/3\_Confidence\_0.714\_Length\_3370|. |sp|P14773|  
HMDH\_DROME 3-hydroxy-3-methylglutaryl-coenzyme A reductase  
OS=Drosophila melanogaster GN=Hmgcr PE=2 SV=2|e=0|from=496|to=3111|  
frame=-2|Fragment\_2  
LDRG

>Locus\_6862\_Transcript\_2/3\_Confidence\_0.714\_Length\_3370|. |sp|P14773|  
HMDH\_DROME 3-hydroxy-3-methylglutaryl-coenzyme A reductase  
OS=Drosophila melanogaster GN=Hmgcr PE=2 SV=2|e=0|from=496|to=3111|  
frame=-2|Fragment\_3  
VPAGPGTVSPLARHCG

>Locus\_6862\_Transcript\_2/3\_Confidence\_0.714\_Length\_3370|. |sp|P14773|  
HMDH\_DROME 3-hydroxy-3-methylglutaryl-coenzyme A reductase  
OS=Drosophila melanogaster GN=Hmgcr PE=2 SV=2|e=0|from=496|to=3111|  
frame=-2|Fragment\_4  
AWRGGSCPVP

>Locus\_6862\_Transcript\_2/3\_Confidence\_0.714\_Length\_3370|. |sp|P14773|  
HMDH\_DROME 3-hydroxy-3-methylglutaryl-coenzyme A reductase  
OS=Drosophila melanogaster GN=Hmgcr PE=2 SV=2|e=0|from=496|to=3111|  
frame=-2|Fragment\_5  
GGPQQTAT

>Locus\_6862\_Transcript\_2/3\_Confidence\_0.714\_Length\_3370|. |sp|P14773|  
HMDH\_DROME 3-hydroxy-3-methylglutaryl-coenzyme A reductase  
OS=Drosophila melanogaster GN=Hmgcr PE=2 SV=2|e=0|from=496|to=3111|  
frame=-2|Fragment\_6  
DAEYNAADVILMTIIRCSAVLYSYYQFCNLHKLGSKYILAIAGLFT

>Locus\_6862\_Transcript\_2/3\_Confidence\_0.714\_Length\_3370|. |sp|P14773|  
HMDH\_DROME 3-hydroxy-3-methylglutaryl-coenzyme A reductase  
OS=Drosophila melanogaster GN=Hmgcr PE=2 SV=2|e=0|from=496|to=3111|  
frame=-2|Fragment\_7  
VINFLRSDIS

>Locus\_6862\_Transcript\_2/3\_Confidence\_0.714\_Length\_3370|. |sp|P14773|  
HMDH\_DROME 3-hydroxy-3-methylglutaryl-coenzyme A reductase  
OS=Drosophila melanogaster GN=Hmgcr PE=2 SV=2|e=0|from=496|to=3111|  
frame=-2|Fragment\_8  
AEVTQNIARGMSLLGPTITLDTLVEALVIGVGTLSGVPRLEVLCCFACLSVLVNYVVFMT  
FYPACLSLILELSRTGEGSNLGRGEA

>Locus\_6862\_Transcript\_2/3\_Confidence\_0.714\_Length\_3370|. |sp|P14773|  
HMDH\_DROME 3-hydroxy-3-methylglutaryl-coenzyme A reductase  
OS=Drosophila melanogaster GN=Hmgcr PE=2 SV=2|e=0|from=496|to=3111|  
frame=-2|Fragment\_9  
LLAKALHEEDQKPNPVVQRVKVIMSVGLMIVHAHSRWSLQDGGDHDGPAAPLVGSEQHRT  
MTQNRTEETSLPGHLMRWMAVGAEQ

>Locus\_6862\_Transcript\_2/3\_Confidence\_0.714\_Length\_3370|. |sp|P14773|  
HMDH\_DROME 3-hydroxy-3-methylglutaryl-coenzyme A reductase  
OS=Drosophila melanogaster GN=Hmgcr PE=2 SV=2|e=0|from=496|to=3111|  
frame=-2|Fragment\_10  
VKFIFFEDNQQQLAGQLRMSESENTDNSNATTMRDRERERP

>Locus\_6862\_Transcript\_2/3\_Confidence\_0.714\_Length\_3370|. |sp|P14773|  
HMDH\_DROME 3-hydroxy-3-methylglutaryl-coenzyme A reductase  
OS=Drosophila melanogaster GN=Hmgcr PE=2 SV=2|e=0|from=496|to=3111|  
frame=-2|Fragment\_11  
IFGIGDEATEDKATQVTMIEESQSNEVEVEPEPRSLDVCLEIYRSER

>Locus\_6862\_Transcript\_2/3\_Confidence\_0.714\_Length\_3370|. |sp|P14773|  
HMDH\_DROME 3-hydroxy-3-methylglutaryl-coenzyme A reductase  
OS=Drosophila melanogaster GN=Hmgcr PE=2 SV=2|e=0|from=496|to=3111|  
frame=-2|Fragment\_12  
GAAALTDAEVALLVRA

>Locus\_6862\_Transcript\_2/3\_Confidence\_0.714\_Length\_3370|. |sp|P14773|  
HMDH\_DROME 3-hydroxy-3-methylglutaryl-coenzyme A reductase

OS=Drosophila melanogaster GN=Hmgcr PE=2 SV=2|e=0|from=496|to=3111|  
frame=-2|Fragment\_13  
RHIPLYRIEAAVGDDEKGVKLRRLTSEGLFSDTALRDLPLYLDYDYSRVMNACCENVLG  
YVQVPVGFAGPLLLDGRKYVPMATTEGALVASTNRGCKALLARGVNSVVEDVGMTRAPC  
IRFPTVRRADCAKNWLERANFEAVKASFDSTSRFARLQEIYVGMGDPQLYVFRATTGD  
AMGMNMVSKGAEMALRHVQKVPDMEIVSLSGNYCSDKKPAAINWIKGRGKRVVCDVIP  
GTVLSSVFRTNAATLVRCNKLKNMVGTSLAGSIGGNAHAANMVTAFIATGQDPAQNV  
SSNCSTGMEVCGDNEDLYMTCTMPSLEVGTIGGGTVLPGQACLEMLGVKGAHPAQPAE  
NAKSLARIICATVMAGELSLAALVNSDLVRSRHRHRSSVAVNPGLNNSSESSTVS  
>Locus\_6862\_Transcript\_3/3\_Confidence\_0.714\_Length\_3370|. |sp|P14773|  
HMDH\_DROME 3-hydroxy-3-methylglutaryl-coenzyme A reductase  
OS=Drosophila melanogaster GN=Hmgcr PE=2 SV=2|e=0|from=496|to=3111|  
frame=-2|Fragment\_1  
MVGRLFRAHGFCASHPWEVIV  
>Locus\_6862\_Transcript\_3/3\_Confidence\_0.714\_Length\_3370|. |sp|P14773|  
HMDH\_DROME 3-hydroxy-3-methylglutaryl-coenzyme A reductase  
OS=Drosophila melanogaster GN=Hmgcr PE=2 SV=2|e=0|from=496|to=3111|  
frame=-2|Fragment\_2  
LDRG  
>Locus\_6862\_Transcript\_3/3\_Confidence\_0.714\_Length\_3370|. |sp|P14773|  
HMDH\_DROME 3-hydroxy-3-methylglutaryl-coenzyme A reductase  
OS=Drosophila melanogaster GN=Hmgcr PE=2 SV=2|e=0|from=496|to=3111|  
frame=-2|Fragment\_3  
VPAGPGTVSPLARHCG  
>Locus\_6862\_Transcript\_3/3\_Confidence\_0.714\_Length\_3370|. |sp|P14773|  
HMDH\_DROME 3-hydroxy-3-methylglutaryl-coenzyme A reductase  
OS=Drosophila melanogaster GN=Hmgcr PE=2 SV=2|e=0|from=496|to=3111|  
frame=-2|Fragment\_4  
AWRGGSCPVP  
>Locus\_6862\_Transcript\_3/3\_Confidence\_0.714\_Length\_3370|. |sp|P14773|  
HMDH\_DROME 3-hydroxy-3-methylglutaryl-coenzyme A reductase  
OS=Drosophila melanogaster GN=Hmgcr PE=2 SV=2|e=0|from=496|to=3111|  
frame=-2|Fragment\_5  
GGPQQTAT  
>Locus\_6862\_Transcript\_3/3\_Confidence\_0.714\_Length\_3370|. |sp|P14773|  
HMDH\_DROME 3-hydroxy-3-methylglutaryl-coenzyme A reductase  
OS=Drosophila melanogaster GN=Hmgcr PE=2 SV=2|e=0|from=496|to=3111|  
frame=-2|Fragment\_6  
DAEYNAADVILMTIIRCSAVLYSYYQFCNLHKLGSKYILAIAGLFT  
>Locus\_6862\_Transcript\_3/3\_Confidence\_0.714\_Length\_3370|. |sp|P14773|  
HMDH\_DROME 3-hydroxy-3-methylglutaryl-coenzyme A reductase  
OS=Drosophila melanogaster GN=Hmgcr PE=2 SV=2|e=0|from=496|to=3111|  
frame=-2|Fragment\_7  
VINFLRSDIS  
>Locus\_6862\_Transcript\_3/3\_Confidence\_0.714\_Length\_3370|. |sp|P14773|  
HMDH\_DROME 3-hydroxy-3-methylglutaryl-coenzyme A reductase  
OS=Drosophila melanogaster GN=Hmgcr PE=2 SV=2|e=0|from=496|to=3111|  
frame=-2|Fragment\_8  
AEVTQNIARGMSLLGPTITLDTLVEALVIGVGTLSGVPRLVLCFFACLSVLVNYVVFMT  
FYPACLSLILELSRTGEGSNLGRGEA  
>Locus\_6862\_Transcript\_3/3\_Confidence\_0.714\_Length\_3370|. |sp|P14773|  
HMDH\_DROME 3-hydroxy-3-methylglutaryl-coenzyme A reductase  
OS=Drosophila melanogaster GN=Hmgcr PE=2 SV=2|e=0|from=496|to=3111|  
frame=-2|Fragment\_9

LLAKALHEEDQKPNPVVQRVKVIMSVGLMIVHAHSRWSLQDGGDHDGPAAPLVGSEQHRT  
MTQNRTEETSPLPGLMRWMAVGAEQ  
>Locus\_6862\_Transcript\_3/3\_Confidence\_0.714\_Length\_3370|. |sp|P14773|  
HMDH\_DROME 3-hydroxy-3-methylglutaryl-coenzyme A reductase  
OS=Drosophila melanogaster GN=Hmgcr PE=2 SV=2|e=0|from=496|to=3111|  
frame=-2|Fragment\_10  
VKFIFFEDNQQLAGQLRMSESENTDNSNATTMRDRERERP  
>Locus\_6862\_Transcript\_3/3\_Confidence\_0.714\_Length\_3370|. |sp|P14773|  
HMDH\_DROME 3-hydroxy-3-methylglutaryl-coenzyme A reductase  
OS=Drosophila melanogaster GN=Hmgcr PE=2 SV=2|e=0|from=496|to=3111|  
frame=-2|Fragment\_11  
IFGIGDEATEDKATQVTMIEESQSNEVEVEPEPRSLDVCLEIYRSER  
>Locus\_6862\_Transcript\_3/3\_Confidence\_0.714\_Length\_3370|. |sp|P14773|  
HMDH\_DROME 3-hydroxy-3-methylglutaryl-coenzyme A reductase  
OS=Drosophila melanogaster GN=Hmgcr PE=2 SV=2|e=0|from=496|to=3111|  
frame=-2|Fragment\_12  
GAAALTDAEVALLVRA  
>Locus\_6862\_Transcript\_3/3\_Confidence\_0.714\_Length\_3370|. |sp|P14773|  
HMDH\_DROME 3-hydroxy-3-methylglutaryl-coenzyme A reductase  
OS=Drosophila melanogaster GN=Hmgcr PE=2 SV=2|e=0|from=496|to=3111|  
frame=-2|Fragment\_13  
RHIPLYRIEAAVGDDERGVKLRRLTSEGLFSDTALRDLPLYLDYDYSRVMNACCENVLG  
YVQVPVGFAGPLLLDGRKYVPMATTEGALVASTNRGCKALLARGVNSVVEDVGMTRAPC  
IRFPTVRRADCAKNWLERRANFEAVKASFDSTSRFARLQEIYVGMGDPQLYVRFRTTGD  
AMGMNMVSKGAEMALRHVQKVPDMEIVSLSGNYCSDKKPAAINWIKGRGKRVVCDVIP  
GTVLSSVFRTNAATLVRCNKLKNMVGTSLAGSIGGNAHAANMVTAIFIATGQDPAQNV  
SSNCSTGMEVCGDNEDLYMTCTMPSLEVGTIGGGTVLPGQGACLEMLGVKGAHPAQPAE  
NAKSLARIICATVMAGELSLAALVNSDLVRSRHRNRSSVAVNPGLNNSSESTVS

>Locus\_17319\_Transcript\_1/1\_Confidence\_1.000\_Length\_590|UNIGENE  
REPRESENTATIVE TRANSCRIPT|sp|P16395|ACM1\_DROME Muscarinic  
acetylcholine receptor DM1 OS=Drosophila melanogaster GN=mAcR-60C  
PE=2 SV=2|e=3.61859E-48|from=3|to=545|frame=3|Fragment\_1  
ERTVPNTECYIQFIETNHYITFGTAIAAFYVPVTVMCILYFKIWRETKKQKDLPLNLQAG

>Locus\_17319\_Transcript\_1/1\_Confidence\_1.000\_Length\_590|UNIGENE  
REPRESENTATIVE TRANSCRIPT|sp|P16395|ACM1\_DROME Muscarinic  
acetylcholine receptor DM1 OS=Drosophila melanogaster GN=mAcR-60C  
PE=2 SV=2|e=3.61859E-48|from=3|to=545|frame=3|Fragment\_2  
EATHVNHTG

>Locus\_17319\_Transcript\_1/1\_Confidence\_1.000\_Length\_590|UNIGENE  
REPRESENTATIVE TRANSCRIPT|sp|P16395|ACM1\_DROME Muscarinic  
acetylcholine receptor DM1 OS=Drosophila melanogaster GN=mAcR-60C  
PE=2 SV=2|e=3.61859E-48|from=3|to=545|frame=3|Fragment\_3  
EWARPRSESAGDPDD

>Locus\_17319\_Transcript\_1/1\_Confidence\_1.000\_Length\_590|UNIGENE  
REPRESENTATIVE TRANSCRIPT|sp|P16395|ACM1\_DROME Muscarinic  
acetylcholine receptor DM1 OS=Drosophila melanogaster GN=mAcR-60C  
PE=2 SV=2|e=3.61859E-48|from=3|to=545|frame=3|Fragment\_4  
GCGNTTDSG

>Locus\_17319\_Transcript\_1/1\_Confidence\_1.000\_Length\_590|UNIGENE  
REPRESENTATIVE TRANSCRIPT|sp|P16395|ACM1\_DROME Muscarinic  
acetylcholine receptor DM1 OS=Drosophila melanogaster GN=mAcR-60C  
PE=2 SV=2|e=3.61859E-48|from=3|to=545|frame=3|Fragment\_5  
GTYYKRTGL

>Locus\_17319\_Transcript\_1/1\_Confidence\_1.000\_Length\_590|UNIGENE REPRESENTATIVE TRANSCRIPT|sp|P16395|ACM1\_DROME Muscarinic acetylcholine receptor DM1 OS=Drosophila melanogaster GN=mAcR-60C PE=2 SV=2|e=3.61859E-48|from=3|to=545|frame=3|Fragment\_6 ALFLWYASCGGVREWCVAWVHSGR

>Locus\_17319\_Transcript\_1/1\_Confidence\_1.000\_Length\_590|UNIGENE REPRESENTATIVE TRANSCRIPT|sp|P16395|ACM1\_DROME Muscarinic acetylcholine receptor DM1 OS=Drosophila melanogaster GN=mAcR-60C PE=2 SV=2|e=3.61859E-48|from=3|to=545|frame=3|Fragment\_7 GYATPVSIIETPLQSSVSRCTSLNVIRDPY

>Locus\_18519\_Transcript\_1/2\_Confidence\_0.667\_Length\_996|UNIGENE REPRESENTATIVE TRANSCRIPT|sp|P16621|LAR\_DROME Tyrosine-protein phosphatase Lar OS=Drosophila melanogaster GN=Lar PE=1 SV=2|e=2.8018E-123|from=1|to=996|frame=1|Fragment\_1 RGAGPYCADVSARTERDLGRAPMSVQAVATSDSSAEVWVEGVP SRGKVVGYRVFY

>Locus\_18519\_Transcript\_1/2\_Confidence\_0.667\_Length\_996|UNIGENE REPRESENTATIVE TRANSCRIPT|sp|P16621|LAR\_DROME Tyrosine-protein phosphatase Lar OS=Drosophila melanogaster GN=Lar PE=1 SV=2|e=2.8018E-123|from=1|to=996|frame=1|Fragment\_2

LDEWQHKDVARTEADLVNLEKYATYRVAVAARTSDGGLWRLSEKVNKVKPEDVPLDLR AHDVSTHSM T LSWSPPIRLNPNVNYKVSF DAVKEFVDSQGFTRSQTVPREVVLPAHAKNH MIDELSPFTTYCVNVS AVPN DYQYRPPARITVTTQMAAPQPMVKPDFYGVVNGEEIQVIL PQASEEYGPISHYYLIVVPEDESLAHKHPDQFLTDEMIAGAKMVNNGAPGTSASMAKAS LLDAPYIAAKFPQRNIPYTFHLG

>Locus\_18519\_Transcript\_2/2\_Confidence\_0.667\_Length\_672|. |sp|P16621| LAR\_DROME Tyrosine-protein phosphatase Lar OS=Drosophila melanogaster GN=Lar PE=1 SV=2|e=9.83485E-91|from=4|to=672|frame=1| Fragment\_1

RLSEKVNKVKPEDVPLDLRAHDVSTHSM T LSWSPPIRLNPNVNYKVSF DAVKEFVDSQGF TRSQTVPREVVLPAHAKNHMIDELSPFTTYCVNVS AVPN DYQYRPPARITVTTQMAAPQ PMVKPDFYGVVNGEEIQVILPQASEEYGPISHYYLIVVPEDESLAHKHPDQFLTDEMIAG AKMVNNGAPGTSASMAKASLLDAPYIAAKFPQRNIPYTFHLG

>Locus\_16047\_Transcript\_3/5\_Confidence\_0.200\_Length\_437|. |sp|P16621| LAR\_DROME Tyrosine-protein phosphatase Lar OS=Drosophila melanogaster GN=Lar PE=1 SV=2|e=2.38114E-40|from=2|to=436|frame=2| Fragment\_1

GDIYDGFTRRRLERDRRYRIFVRAVVDTPQKHLTYSSPFSEYLSLSMREV

>Locus\_16047\_Transcript\_3/5\_Confidence\_0.200\_Length\_437|. |sp|P16621| LAR\_DROME Tyrosine-protein phosphatase Lar OS=Drosophila melanogaster GN=Lar PE=1 SV=2|e=2.38114E-40|from=2|to=436|frame=2| Fragment\_2

VSVNRNTEEAGLVWIVGP

>Locus\_16047\_Transcript\_3/5\_Confidence\_0.200\_Length\_437|. |sp|P16621| LAR\_DROME Tyrosine-protein phosphatase Lar OS=Drosophila melanogaster GN=Lar PE=1 SV=2|e=2.38114E-40|from=2|to=436|frame=2| Fragment\_3

SI

>Locus\_16047\_Transcript\_3/5\_Confidence\_0.200\_Length\_437|. |sp|P16621| LAR\_DROME Tyrosine-protein phosphatase Lar OS=Drosophila melanogaster GN=Lar PE=1 SV=2|e=2.38114E-40|from=2|to=436|frame=2| Fragment\_4

RRRNRPCAPDQAAVTRPLMAADLGAGPTPQDPVEMRRLN

>Locus\_26560\_Transcript\_1/1\_Confidence\_1.000\_Length\_276|. |sp|P16621|

LAR\_DROME Tyrosine-protein phosphatase Lar OS=Drosophila  
melanogaster GN=Lar PE=1 SV=2|e=3.05006E-29|from=3|to=275|frame=-2|  
Fragment\_1

EHINGGQITARRIGDLERGVVEYFRVAGRNAIGVGQEAVKYYSTPEGAPDGPPTTEVKVRF  
QTPDSIVVRWLPPTREHRNGRIVRYDAQLRR

>Locus\_28164\_Transcript\_1/1\_Confidence\_1.000\_Length\_246|. |sp|P16621|

LAR\_DROME Tyrosine-protein phosphatase Lar OS=Drosophila  
melanogaster GN=Lar PE=1 SV=2|e=6.13889E-17|from=2|to=244|frame=2|  
Fragment\_1

DESLAHKHPDQFLTDEMIAGAKMVNNGAPGTSASMAKASLLDAPYIAAKFPQRNIPYTF  
HLGSGDIYDGFTRRRLERDRR

>Locus\_30763\_Transcript\_1/1\_Confidence\_1.000\_Length\_522|UNIGENE  
REPRESENTATIVE TRANSCRIPT|sp|P17971|KCINAL\_DROME Potassium voltage-  
gated channel protein Sha1 OS=Drosophila melanogaster GN=Sha1 PE=1  
SV=2|e=8.88888E-95|from=2|to=520|frame=-3|Fragment\_1

PCGERYKIVFFCLDTACVMIFTAEYLLRLFAAPDRCKFVRSVMSIIDVVAILPYYIGLGI  
TDNDDVSGAFVTLRVFRVFRIFKFSRHSQGLRILGYTLKSCASELGFLVFLAMAIIFA  
TVMFYAEKNVDGNTFTSIPAAFWYTIVTMTTLGYGDMVPQTIAGKIVGGVCSL

>Locus\_29656\_Transcript\_1/1\_Confidence\_1.000\_Length\_268|. |sp|P17971|

KCINAL\_DROME Potassium voltage-gated channel protein Sha1  
OS=Drosophila melanogaster GN=Sha1 PE=1 SV=2|e=1.46442E-47|from=2|  
to=268|frame=2|Fragment\_1

KLSENGDQNLQQLTNIRQKMWRAFENPHTSTAALVFYYVTGFFIAVSVMANVVETVPCGH  
RPGRAGTLPGERYKIVFFCLDTACVMIF

>Locus\_12205\_Transcript\_1/3\_Confidence\_0.714\_Length\_2995|UNIGENE

REPRESENTATIVE TRANSCRIPT|sp|P18168|SERR\_DROME Protein serrate  
OS=Drosophila melanogaster GN=Ser PE=1 SV=3|e=0|from=509|to=2989|  
frame=-1|Fragment\_1

ANGYQCLCDAGWEGPNCETNIDDCVGNPCEHGGSCIDLVDGFRCECPSEWTGEHCETDVD  
EC

>Locus\_12205\_Transcript\_1/3\_Confidence\_0.714\_Length\_2995|UNIGENE

REPRESENTATIVE TRANSCRIPT|sp|P18168|SERR\_DROME Protein serrate  
OS=Drosophila melanogaster GN=Ser PE=1 SV=3|e=0|from=509|to=2989|  
frame=-1|Fragment\_2

LSS

>Locus\_12205\_Transcript\_1/3\_Confidence\_0.714\_Length\_2995|UNIGENE

REPRESENTATIVE TRANSCRIPT|sp|P18168|SERR\_DROME Protein serrate  
OS=Drosophila melanogaster GN=Ser PE=1 SV=3|e=0|from=509|to=2989|  
frame=-1|Fragment\_3

PCANAVSCSNTHGGFHTCAPGWGGALCARNIDDCVQCLNGATCIDLVDDYHCACASGY  
TGRDCSQDVEDECQTNPCRHHGECVDLVGGFRICPVGRSGTLCEDDIDRCAPNPCQNGAE  
CLNTPGGYYCHCPGGLTGRHCEGPRHPVLA

>Locus\_12205\_Transcript\_1/3\_Confidence\_0.714\_Length\_2995|UNIGENE

REPRESENTATIVE TRANSCRIPT|sp|P18168|SERR\_DROME Protein serrate  
OS=Drosophila melanogaster GN=Ser PE=1 SV=3|e=0|from=509|to=2989|  
frame=-1|Fragment\_4

NDGCMPN

>Locus\_12205\_Transcript\_1/3\_Confidence\_0.714\_Length\_2995|UNIGENE

REPRESENTATIVE TRANSCRIPT|sp|P18168|SERR\_DROME Protein serrate  
OS=Drosophila melanogaster GN=Ser PE=1 SV=3|e=0|from=509|to=2989|  
frame=-1|Fragment\_5

PCQNNGTCLLGGPNGAAFTCLCSAGTRGRLC

>Locus\_12205\_Transcript\_1/3\_Confidence\_0.714\_Length\_2995|UNIGENE

REPRESENTATIVE TRANSCRIPT|sp|P18168|SERR\_DROME Protein serrate  
OS=Drosophila melanogaster GN=Ser PE=1 SV=3|e=0|from=509|to=2989|  
frame=-1|Fragment\_6

SEMSNSGVI

>Locus\_12205\_Transcript\_1/3\_Confidence\_0.714\_Length\_2995|UNIGENE  
REPRESENTATIVE TRANSCRIPT|sp|P18168|SERR\_DROME Protein serrate  
OS=Drosophila melanogaster GN=Ser PE=1 SV=3|e=0|from=509|to=2989|  
frame=-1|Fragment\_7

GGSEDDCEGVT

>Locus\_12205\_Transcript\_1/3\_Confidence\_0.714\_Length\_2995|UNIGENE  
REPRESENTATIVE TRANSCRIPT|sp|P18168|SERR\_DROME Protein serrate  
OS=Drosophila melanogaster GN=Ser PE=1 SV=3|e=0|from=509|to=2989|  
frame=-1|Fragment\_8

GRCLNGGIC

>Locus\_12205\_Transcript\_1/3\_Confidence\_0.714\_Length\_2995|UNIGENE  
REPRESENTATIVE TRANSCRIPT|sp|P18168|SERR\_DROME Protein serrate  
OS=Drosophila melanogaster GN=Ser PE=1 SV=3|e=0|from=509|to=2989|  
frame=-1|Fragment\_9

DLQRGRCNCLAGWTGPQCEPLDQCHGEPCHNGGTCVGGPGWFRCECSRGTGPDCRINV  
NECASSPCQGGAPCKDRIGGYTCLCPPGRAGERCEIETSG

>Locus\_12205\_Transcript\_1/3\_Confidence\_0.714\_Length\_2995|UNIGENE  
REPRESENTATIVE TRANSCRIPT|sp|P18168|SERR\_DROME Protein serrate  
OS=Drosophila melanogaster GN=Ser PE=1 SV=3|e=0|from=509|to=2989|  
frame=-1|Fragment\_10

SGCWAPPNS

>Locus\_12205\_Transcript\_1/3\_Confidence\_0.714\_Length\_2995|UNIGENE  
REPRESENTATIVE TRANSCRIPT|sp|P18168|SERR\_DROME Protein serrate  
OS=Drosophila melanogaster GN=Ser PE=1 SV=3|e=0|from=509|to=2989|  
frame=-1|Fragment\_11

TWLN

>Locus\_12205\_Transcript\_1/3\_Confidence\_0.714\_Length\_2995|UNIGENE  
REPRESENTATIVE TRANSCRIPT|sp|P18168|SERR\_DROME Protein serrate  
OS=Drosophila melanogaster GN=Ser PE=1 SV=3|e=0|from=509|to=2989|  
frame=-1|Fragment\_12

ECNTCTCVQGIQRCSNLWCGLQDCLGVN

>Locus\_12205\_Transcript\_1/3\_Confidence\_0.714\_Length\_2995|UNIGENE  
REPRESENTATIVE TRANSCRIPT|sp|P18168|SERR\_DROME Protein serrate  
OS=Drosophila melanogaster GN=Ser PE=1 SV=3|e=0|from=509|to=2989|  
frame=-1|Fragment\_13

STKCAPHEVCVPAPQESCLSSPCTARGDCRALEPSRRVAPPALPASPDCWPNQAALGEQC  
ARVSALLETGKAPRGATSETLCDALRTLGLARLVREPTADLRH

>Locus\_12205\_Transcript\_1/3\_Confidence\_0.714\_Length\_2995|UNIGENE  
REPRESENTATIVE TRANSCRIPT|sp|P18168|SERR\_DROME Protein serrate  
OS=Drosophila melanogaster GN=Ser PE=1 SV=3|e=0|from=509|to=2989|  
frame=-1|Fragment\_14

IVVVLCEMKTGSNDTVEVTVSSPPGGNAGAQIVALSVRLLGELISRGAAS

>Locus\_12205\_Transcript\_1/3\_Confidence\_0.714\_Length\_2995|UNIGENE  
REPRESENTATIVE TRANSCRIPT|sp|P18168|SERR\_DROME Protein serrate  
OS=Drosophila melanogaster GN=Ser PE=1 SV=3|e=0|from=509|to=2989|  
frame=-1|Fragment\_15

SDGALPGAIREVKVETALLSSETQGGYFIALICVMSIIVLAAVVLGIFVMRQMRGRSI  
SGMGLTPSPDAFRAEEEEKSNLQNEENFRRYANPLKEE

>Locus\_12205\_Transcript\_1/3\_Confidence\_0.714\_Length\_2995|UNIGENE  
REPRESENTATIVE TRANSCRIPT|sp|P18168|SERR\_DROME Protein serrate

OS=Drosophila melanogaster GN=Ser PE=1 SV=3|e=0|from=509|to=2989|  
frame=-1|Fragment\_16  
SIELSPKVSVEMHKSSQDLNPNVSLVRPIGGEALAGPSTTAQDFMHEYSQRLHKNKSL  
NPDLVHVDADLLHVDCNLKTAH  
>Locus\_12205\_Transcript\_1/3\_Confidence\_0.714\_Length\_2995|UNIGENE  
REPRESENTATIVE TRANSCRIPT|sp|P18168|SERR\_DROME Protein serrate  
OS=Drosophila melanogaster GN=Ser PE=1 SV=3|e=0|from=509|to=2989|  
frame=-1|Fragment\_17  
RNSQILLYKAQNPDMRKNTTGTFDNLNKDFGKRSINM  
>Locus\_12205\_Transcript\_1/3\_Confidence\_0.714\_Length\_2995|UNIGENE  
REPRESENTATIVE TRANSCRIPT|sp|P18168|SERR\_DROME Protein serrate  
OS=Drosophila melanogaster GN=Ser PE=1 SV=3|e=0|from=509|to=2989|  
frame=-1|Fragment\_18  
STASSDSVLTVLV  
>Locus\_12205\_Transcript\_3/3\_Confidence\_0.714\_Length\_2995|. |sp|  
P18168|SERR\_DROME Protein serrate OS=Drosophila melanogaster GN=Ser  
PE=1 SV=3|e=0|from=509|to=2989|frame=-1|Fragment\_1  
ANGYQCLCDAGWEGPNCETNIDDCVGNPCEHGGSCIDLVDGFRCECPSEWTGEHCETDVD  
EC  
>Locus\_12205\_Transcript\_3/3\_Confidence\_0.714\_Length\_2995|. |sp|  
P18168|SERR\_DROME Protein serrate OS=Drosophila melanogaster GN=Ser  
PE=1 SV=3|e=0|from=509|to=2989|frame=-1|Fragment\_2  
LSS  
>Locus\_12205\_Transcript\_3/3\_Confidence\_0.714\_Length\_2995|. |sp|  
P18168|SERR\_DROME Protein serrate OS=Drosophila melanogaster GN=Ser  
PE=1 SV=3|e=0|from=509|to=2989|frame=-1|Fragment\_3  
PCANAVSCSNTHGGFHCTCAPGWGGALCARNIDDCVQCLNGATCIDLVDDYHCACASGY  
TGRDCSQDVDECQTNPCRHGGEVDLVGGFRICPVGRSGTLCEDDIDRCAPNPCQNGAE  
CLNTPGGYYCHCPGGLTGRHCEGPRHPVLA  
>Locus\_12205\_Transcript\_3/3\_Confidence\_0.714\_Length\_2995|. |sp|  
P18168|SERR\_DROME Protein serrate OS=Drosophila melanogaster GN=Ser  
PE=1 SV=3|e=0|from=509|to=2989|frame=-1|Fragment\_4  
NDGCMPN  
>Locus\_12205\_Transcript\_3/3\_Confidence\_0.714\_Length\_2995|. |sp|  
P18168|SERR\_DROME Protein serrate OS=Drosophila melanogaster GN=Ser  
PE=1 SV=3|e=0|from=509|to=2989|frame=-1|Fragment\_5  
PCQNGTCLLGGPNGAAFTCLCSAGTRGRLC  
>Locus\_12205\_Transcript\_3/3\_Confidence\_0.714\_Length\_2995|. |sp|  
P18168|SERR\_DROME Protein serrate OS=Drosophila melanogaster GN=Ser  
PE=1 SV=3|e=0|from=509|to=2989|frame=-1|Fragment\_6  
SEMSNSGVI  
>Locus\_12205\_Transcript\_3/3\_Confidence\_0.714\_Length\_2995|. |sp|  
P18168|SERR\_DROME Protein serrate OS=Drosophila melanogaster GN=Ser  
PE=1 SV=3|e=0|from=509|to=2989|frame=-1|Fragment\_7  
GGSEDDCEGVT  
>Locus\_12205\_Transcript\_3/3\_Confidence\_0.714\_Length\_2995|. |sp|  
P18168|SERR\_DROME Protein serrate OS=Drosophila melanogaster GN=Ser  
PE=1 SV=3|e=0|from=509|to=2989|frame=-1|Fragment\_8  
GRCLNGGIC  
>Locus\_12205\_Transcript\_3/3\_Confidence\_0.714\_Length\_2995|. |sp|  
P18168|SERR\_DROME Protein serrate OS=Drosophila melanogaster GN=Ser  
PE=1 SV=3|e=0|from=509|to=2989|frame=-1|Fragment\_9  
DLQRGRCNCLAGWTGPQCEPLDQCHGEPCHNGGTGCVGGPWFRCECSRGTGPDCRINV  
NECASSPCQGGAPCKDRIGGYTCLCPPGRAGERCEIETSG

>Locus\_12205\_Transcript\_3/3\_Confidence\_0.714\_Length\_2995|. |sp|  
P18168|SERR\_DROME Protein serrate OS=Drosophila melanogaster GN=Ser  
PE=1 SV=3|e=0|from=509|to=2989|frame=-1|Fragment\_10  
SGCWAPPNS

>Locus\_12205\_Transcript\_3/3\_Confidence\_0.714\_Length\_2995|. |sp|  
P18168|SERR\_DROME Protein serrate OS=Drosophila melanogaster GN=Ser  
PE=1 SV=3|e=0|from=509|to=2989|frame=-1|Fragment\_11  
TWLN

>Locus\_12205\_Transcript\_3/3\_Confidence\_0.714\_Length\_2995|. |sp|  
P18168|SERR\_DROME Protein serrate OS=Drosophila melanogaster GN=Ser  
PE=1 SV=3|e=0|from=509|to=2989|frame=-1|Fragment\_12  
ECNTCTCVQGIQRCSNLWCGLQDCLGVN

>Locus\_12205\_Transcript\_3/3\_Confidence\_0.714\_Length\_2995|. |sp|  
P18168|SERR\_DROME Protein serrate OS=Drosophila melanogaster GN=Ser  
PE=1 SV=3|e=0|from=509|to=2989|frame=-1|Fragment\_13  
STKCAPHEVCVPAPQESCLSSPCTARGDCRALEPSRRVAPPALPASPDCWPNQAALGEQC  
ARVSALLETKAPRGATSETLCDALRTLGLARLVREPTADLRH

>Locus\_12205\_Transcript\_3/3\_Confidence\_0.714\_Length\_2995|. |sp|  
P18168|SERR\_DROME Protein serrate OS=Drosophila melanogaster GN=Ser  
PE=1 SV=3|e=0|from=509|to=2989|frame=-1|Fragment\_14  
IVVVLCEMKTGSNDTVEVTVSSPPGGNAGAQIVALSVRLGELISRGAAS

>Locus\_12205\_Transcript\_3/3\_Confidence\_0.714\_Length\_2995|. |sp|  
P18168|SERR\_DROME Protein serrate OS=Drosophila melanogaster GN=Ser  
PE=1 SV=3|e=0|from=509|to=2989|frame=-1|Fragment\_15  
SDGALPGAIREVKVETALLSSETQGGEYFIALICVMSIIVLAAVVLGIFVMRQMRGRSI  
SGMGLTPSPDAFRAEEEEKSNLQNEENFRRYANPLKEE

>Locus\_12205\_Transcript\_3/3\_Confidence\_0.714\_Length\_2995|. |sp|  
P18168|SERR\_DROME Protein serrate OS=Drosophila melanogaster GN=Ser  
PE=1 SV=3|e=0|from=509|to=2989|frame=-1|Fragment\_16  
SIELSPKVSVMHHKSSQDLNPNVSLVRPIGALAGPSTTAQDFMHEYSQRLHKNKSL  
NPDLVHVDADLLHVDCNLKTAH

>Locus\_12205\_Transcript\_3/3\_Confidence\_0.714\_Length\_2995|. |sp|  
P18168|SERR\_DROME Protein serrate OS=Drosophila melanogaster GN=Ser  
PE=1 SV=3|e=0|from=509|to=2989|frame=-1|Fragment\_17  
RNSQILLYKAQNPDMRKNNTGTFDNLNKDFGKRSINM

>Locus\_12205\_Transcript\_3/3\_Confidence\_0.714\_Length\_2995|. |sp|  
P18168|SERR\_DROME Protein serrate OS=Drosophila melanogaster GN=Ser  
PE=1 SV=3|e=0|from=509|to=2989|frame=-1|Fragment\_18  
STASSDSVLTVLV

>Locus\_12205\_Transcript\_1/3\_Confidence\_0.714\_Length\_2995|. |sp|  
P18168|SERR\_DROME Protein serrate OS=Drosophila melanogaster GN=Ser  
PE=1 SV=3|e=2.69588E-57|from=1859|to=2986|frame=-1|Fragment\_1  
NGYQCLCDAGWEGPNCETNIDDC

>Locus\_12205\_Transcript\_1/3\_Confidence\_0.714\_Length\_2995|. |sp|  
P18168|SERR\_DROME Protein serrate OS=Drosophila melanogaster GN=Ser  
PE=1 SV=3|e=2.69588E-57|from=1859|to=2986|frame=-1|Fragment\_2  
VGNPCEHGGSCIDL

>Locus\_12205\_Transcript\_1/3\_Confidence\_0.714\_Length\_2995|. |sp|  
P18168|SERR\_DROME Protein serrate OS=Drosophila melanogaster GN=Ser  
PE=1 SV=3|e=2.69588E-57|from=1859|to=2986|frame=-1|Fragment\_3  
DGFRCPCSEWTGEHCETDVDECLSSPCANAVSCS

>Locus\_12205\_Transcript\_1/3\_Confidence\_0.714\_Length\_2995|. |sp|  
P18168|SERR\_DROME Protein serrate OS=Drosophila melanogaster GN=Ser  
PE=1 SV=3|e=2.69588E-57|from=1859|to=2986|frame=-1|Fragment\_4

NTHGGFHCTCAPGWGGALCARNIDDC

>Locus\_12205\_Transcript\_1/3\_Confidence\_0.714\_Length\_2995|. |sp|  
P18168|SERR\_DROME Protein serrate OS=Drosophila melanogaster GN=Ser  
PE=1 SV=3|e=2.69588E-57|from=1859|to=2986|frame=-1|Fragment\_5  
VGQCLNGATCIDLVD

>Locus\_12205\_Transcript\_1/3\_Confidence\_0.714\_Length\_2995|. |sp|  
P18168|SERR\_DROME Protein serrate OS=Drosophila melanogaster GN=Ser  
PE=1 SV=3|e=2.69588E-57|from=1859|to=2986|frame=-1|Fragment\_6  
DYHCACASGYTGRDCSQDVDECQTNPCRHHGECVDLVGGFRCICPVGRSGTLCEDDIDRC

>Locus\_12205\_Transcript\_1/3\_Confidence\_0.714\_Length\_2995|. |sp|  
P18168|SERR\_DROME Protein serrate OS=Drosophila melanogaster GN=Ser  
PE=1 SV=3|e=2.69588E-57|from=1859|to=2986|frame=-1|Fragment\_7  
APNPCQNGAECLNTPGGYYCHCPGGLTGRHCEGPRHPVLAN DGCMNPNCQNGTCLLGGP  
NGAAFTCLCSAGTRGRCLCSEMSNSGVIGGSEDDCEGVTGRCLNGGIC

>Locus\_12205\_Transcript\_1/3\_Confidence\_0.714\_Length\_2995|. |sp|  
P18168|SERR\_DROME Protein serrate OS=Drosophila melanogaster GN=Ser  
PE=1 SV=3|e=2.69588E-57|from=1859|to=2986|frame=-1|Fragment\_8  
DLQRG

>Locus\_12205\_Transcript\_1/3\_Confidence\_0.714\_Length\_2995|. |sp|  
P18168|SERR\_DROME Protein serrate OS=Drosophila melanogaster GN=Ser  
PE=1 SV=3|e=2.69588E-57|from=1859|to=2986|frame=-1|Fragment\_9  
RCNCLAGWTGPQCEEPLDQCHGEPCHNGGTCVGGPGWFRCECSRGTGPDCRINVNECAS  
SPCQGGAPCKDRIGGYTCLCPPGRAGERCE

>Locus\_12205\_Transcript\_3/3\_Confidence\_0.714\_Length\_2995|. |sp|  
P18168|SERR\_DROME Protein serrate OS=Drosophila melanogaster GN=Ser  
PE=1 SV=3|e=2.69588E-57|from=1859|to=2986|frame=-1|Fragment\_1  
NGYQCLCDAGWEGPNCETNIDDC

>Locus\_12205\_Transcript\_3/3\_Confidence\_0.714\_Length\_2995|. |sp|  
P18168|SERR\_DROME Protein serrate OS=Drosophila melanogaster GN=Ser  
PE=1 SV=3|e=2.69588E-57|from=1859|to=2986|frame=-1|Fragment\_2  
VGNPCEHGGSCIDLVD

>Locus\_12205\_Transcript\_3/3\_Confidence\_0.714\_Length\_2995|. |sp|  
P18168|SERR\_DROME Protein serrate OS=Drosophila melanogaster GN=Ser  
PE=1 SV=3|e=2.69588E-57|from=1859|to=2986|frame=-1|Fragment\_3  
DGRFCECPSEWTGEHCETDVDECLSSPCANAVSCS

>Locus\_12205\_Transcript\_3/3\_Confidence\_0.714\_Length\_2995|. |sp|  
P18168|SERR\_DROME Protein serrate OS=Drosophila melanogaster GN=Ser  
PE=1 SV=3|e=2.69588E-57|from=1859|to=2986|frame=-1|Fragment\_4  
NTHGGFHCTCAPGWGGALCARNIDDC

>Locus\_12205\_Transcript\_3/3\_Confidence\_0.714\_Length\_2995|. |sp|  
P18168|SERR\_DROME Protein serrate OS=Drosophila melanogaster GN=Ser  
PE=1 SV=3|e=2.69588E-57|from=1859|to=2986|frame=-1|Fragment\_5  
VGQCLNGATCIDLVD

>Locus\_12205\_Transcript\_3/3\_Confidence\_0.714\_Length\_2995|. |sp|  
P18168|SERR\_DROME Protein serrate OS=Drosophila melanogaster GN=Ser  
PE=1 SV=3|e=2.69588E-57|from=1859|to=2986|frame=-1|Fragment\_6  
DYHCACASGYTGRDCSQDVDECQTNPCRHHGECVDLVGGFRCICPVGRSGTLCEDDIDRC

>Locus\_12205\_Transcript\_3/3\_Confidence\_0.714\_Length\_2995|. |sp|  
P18168|SERR\_DROME Protein serrate OS=Drosophila melanogaster GN=Ser  
PE=1 SV=3|e=2.69588E-57|from=1859|to=2986|frame=-1|Fragment\_7  
APNPCQNGAECLNTPGGYYCHCPGGLTGRHCEGPRHPVLAN DGCMNPNCQNGTCLLGGP  
NGAAFTCLCSAGTRGRCLCSEMSNSGVIGGSEDDCEGVTGRCLNGGIC

>Locus\_12205\_Transcript\_3/3\_Confidence\_0.714\_Length\_2995|. |sp|  
P18168|SERR\_DROME Protein serrate OS=Drosophila melanogaster GN=Ser

PE=1 SV=3|e=2.69588E-57|from=1859|to=2986|frame=-1|Fragment\_8  
DLQRG  
>Locus\_12205\_Transcript\_3/3\_Confidence\_0.714\_Length\_2995|. |sp|  
P18168|SERR\_DROME Protein serrate OS=Drosophila melanogaster GN=Ser  
PE=1 SV=3|e=2.69588E-57|from=1859|to=2986|frame=-1|Fragment\_9  
RCNCLAGWTGPQCEEPLDQCHGEPCHNGGTCVGGPGWFRCECSRGTGPDCRINVNECAS  
SPCQGGAPCKDRIGGYTCLCPPGRAGERCE  
>Locus\_12205\_Transcript\_1/3\_Confidence\_0.714\_Length\_2995|. |sp|  
P18168|SERR\_DROME Protein serrate OS=Drosophila melanogaster GN=Ser  
PE=1 SV=3|e=2.2875E-48|from=1859|to=2977|frame=-1|Fragment\_1  
QCLCDAGWEGPNCETNID  
>Locus\_12205\_Transcript\_1/3\_Confidence\_0.714\_Length\_2995|. |sp|  
P18168|SERR\_DROME Protein serrate OS=Drosophila melanogaster GN=Ser  
PE=1 SV=3|e=2.2875E-48|from=1859|to=2977|frame=-1|Fragment\_2  
DCVGNPCEHGGSCIDLVDGFRCECPSEWTGEHCETDVEDECLSSPCANAVSCSNTHGGFHC  
TCAPGWGGALCARNIDDCVGQ  
>Locus\_12205\_Transcript\_1/3\_Confidence\_0.714\_Length\_2995|. |sp|  
P18168|SERR\_DROME Protein serrate OS=Drosophila melanogaster GN=Ser  
PE=1 SV=3|e=2.2875E-48|from=1859|to=2977|frame=-1|Fragment\_3  
CLNGATCIDLVDD  
>Locus\_12205\_Transcript\_1/3\_Confidence\_0.714\_Length\_2995|. |sp|  
P18168|SERR\_DROME Protein serrate OS=Drosophila melanogaster GN=Ser  
PE=1 SV=3|e=2.2875E-48|from=1859|to=2977|frame=-1|Fragment\_4  
YHCACASGYTGRDCSQDVDECQTNPCRHHGECV  
>Locus\_12205\_Transcript\_1/3\_Confidence\_0.714\_Length\_2995|. |sp|  
P18168|SERR\_DROME Protein serrate OS=Drosophila melanogaster GN=Ser  
PE=1 SV=3|e=2.2875E-48|from=1859|to=2977|frame=-1|Fragment\_5  
DLVGGFRCICPVGRSGTLCEDDIDRCAP  
>Locus\_12205\_Transcript\_1/3\_Confidence\_0.714\_Length\_2995|. |sp|  
P18168|SERR\_DROME Protein serrate OS=Drosophila melanogaster GN=Ser  
PE=1 SV=3|e=2.2875E-48|from=1859|to=2977|frame=-1|Fragment\_6  
NPCQNGAECLNTPG  
>Locus\_12205\_Transcript\_1/3\_Confidence\_0.714\_Length\_2995|. |sp|  
P18168|SERR\_DROME Protein serrate OS=Drosophila melanogaster GN=Ser  
PE=1 SV=3|e=2.2875E-48|from=1859|to=2977|frame=-1|Fragment\_7  
GYYCHCPGGLTGRHCEGPRHPVLANDGCMNPQNNGTC  
>Locus\_12205\_Transcript\_1/3\_Confidence\_0.714\_Length\_2995|. |sp|  
P18168|SERR\_DROME Protein serrate OS=Drosophila melanogaster GN=Ser  
PE=1 SV=3|e=2.2875E-48|from=1859|to=2977|frame=-1|Fragment\_8  
LLGGPNGAAFTCLCSAGTRGRLC  
>Locus\_12205\_Transcript\_1/3\_Confidence\_0.714\_Length\_2995|. |sp|  
P18168|SERR\_DROME Protein serrate OS=Drosophila melanogaster GN=Ser  
PE=1 SV=3|e=2.2875E-48|from=1859|to=2977|frame=-1|Fragment\_9  
SEMSNSGVIGGSEDDCEGVT  
>Locus\_12205\_Transcript\_1/3\_Confidence\_0.714\_Length\_2995|. |sp|  
P18168|SERR\_DROME Protein serrate OS=Drosophila melanogaster GN=Ser  
PE=1 SV=3|e=2.2875E-48|from=1859|to=2977|frame=-1|Fragment\_10  
GRCLNGGICDLQRG  
>Locus\_12205\_Transcript\_1/3\_Confidence\_0.714\_Length\_2995|. |sp|  
P18168|SERR\_DROME Protein serrate OS=Drosophila melanogaster GN=Ser  
PE=1 SV=3|e=2.2875E-48|from=1859|to=2977|frame=-1|Fragment\_11  
RCNCLAGWTGPQCEEPLDQCHGEPCHNGGTCVGGPGWFRCECSRGTGPDCRINVNECAS  
SPCQGGAPCKDRIGGYTCLCPPGRAGERCE  
>Locus\_12205\_Transcript\_3/3\_Confidence\_0.714\_Length\_2995|. |sp|

P18168|SERR\_DROME Protein serrate OS=Drosophila melanogaster GN=Ser  
PE=1 SV=3|e=2.2875E-48|from=1859|to=2977|frame=-1|Fragment\_1  
QCLCDAGWEGPNCETNID  
>Locus\_12205\_Transcript\_3/3\_Confidence\_0.714\_Length\_2995|. |sp|  
P18168|SERR\_DROME Protein serrate OS=Drosophila melanogaster GN=Ser  
PE=1 SV=3|e=2.2875E-48|from=1859|to=2977|frame=-1|Fragment\_2  
DCVGNPCEHGGSCIDLVDGFRCECPSEWTGEHCETDVDECLSSPCANAVSCSNTHGGFHC  
TCAPGWGGALCARNIDDCVGQ  
>Locus\_12205\_Transcript\_3/3\_Confidence\_0.714\_Length\_2995|. |sp|  
P18168|SERR\_DROME Protein serrate OS=Drosophila melanogaster GN=Ser  
PE=1 SV=3|e=2.2875E-48|from=1859|to=2977|frame=-1|Fragment\_3  
CLNGATCIDLVDD  
>Locus\_12205\_Transcript\_3/3\_Confidence\_0.714\_Length\_2995|. |sp|  
P18168|SERR\_DROME Protein serrate OS=Drosophila melanogaster GN=Ser  
PE=1 SV=3|e=2.2875E-48|from=1859|to=2977|frame=-1|Fragment\_4  
YHCACASGYTGRDCSQDVDECQTNPCHRGECV  
>Locus\_12205\_Transcript\_3/3\_Confidence\_0.714\_Length\_2995|. |sp|  
P18168|SERR\_DROME Protein serrate OS=Drosophila melanogaster GN=Ser  
PE=1 SV=3|e=2.2875E-48|from=1859|to=2977|frame=-1|Fragment\_5  
DLVGGFRCICPVGRSGTLCEDDIDRCAP  
>Locus\_12205\_Transcript\_3/3\_Confidence\_0.714\_Length\_2995|. |sp|  
P18168|SERR\_DROME Protein serrate OS=Drosophila melanogaster GN=Ser  
PE=1 SV=3|e=2.2875E-48|from=1859|to=2977|frame=-1|Fragment\_6  
NPCQNGAECLNTPG  
>Locus\_12205\_Transcript\_3/3\_Confidence\_0.714\_Length\_2995|. |sp|  
P18168|SERR\_DROME Protein serrate OS=Drosophila melanogaster GN=Ser  
PE=1 SV=3|e=2.2875E-48|from=1859|to=2977|frame=-1|Fragment\_7  
GYYCHCPGGLTGRHCEGPRHPVLANDGCMNPQNNGTC  
>Locus\_12205\_Transcript\_3/3\_Confidence\_0.714\_Length\_2995|. |sp|  
P18168|SERR\_DROME Protein serrate OS=Drosophila melanogaster GN=Ser  
PE=1 SV=3|e=2.2875E-48|from=1859|to=2977|frame=-1|Fragment\_8  
LLGGPNGAAFTCLCSAGTRGRLC  
>Locus\_12205\_Transcript\_3/3\_Confidence\_0.714\_Length\_2995|. |sp|  
P18168|SERR\_DROME Protein serrate OS=Drosophila melanogaster GN=Ser  
PE=1 SV=3|e=2.2875E-48|from=1859|to=2977|frame=-1|Fragment\_9  
SEMSNSGVIGGSEDDCEGVT  
>Locus\_12205\_Transcript\_3/3\_Confidence\_0.714\_Length\_2995|. |sp|  
P18168|SERR\_DROME Protein serrate OS=Drosophila melanogaster GN=Ser  
PE=1 SV=3|e=2.2875E-48|from=1859|to=2977|frame=-1|Fragment\_10  
GRCLNGGICDLQRG  
>Locus\_12205\_Transcript\_3/3\_Confidence\_0.714\_Length\_2995|. |sp|  
P18168|SERR\_DROME Protein serrate OS=Drosophila melanogaster GN=Ser  
PE=1 SV=3|e=2.2875E-48|from=1859|to=2977|frame=-1|Fragment\_11  
RCNCLAGWTGPQCEEPLDQCHGEPCHNGGTCVGGPGWFRCECSRFTGPDCRINVNECAS  
SPCQGGAPCKDRIGGYTCLCPPGRAGERCE  
>Locus\_12205\_Transcript\_1/3\_Confidence\_0.714\_Length\_2995|. |sp|  
P18168|SERR\_DROME Protein serrate OS=Drosophila melanogaster GN=Ser  
PE=1 SV=3|e=9.30868E-42|from=1766|to=2995|frame=-1|Fragment\_1  
NAANGYQCLCDAGWEGPNCETNIDDCVGNPCEHG  
>Locus\_12205\_Transcript\_1/3\_Confidence\_0.714\_Length\_2995|. |sp|  
P18168|SERR\_DROME Protein serrate OS=Drosophila melanogaster GN=Ser  
PE=1 SV=3|e=9.30868E-42|from=1766|to=2995|frame=-1|Fragment\_2  
GSCIDLVDGFRCECPSEWTGEHCETDVDECLSSPCANAVSCSNTHGGFHCTCAPGWGGAL  
CARNIDDC

>Locus\_12205\_Transcript\_1/3\_Confidence\_0.714\_Length\_2995|. |sp|  
P18168|SERR\_DROME Protein serrate OS=Drosophila melanogaster GN=Ser  
PE=1 SV=3|e=9.30868E-42|from=1766|to=2995|frame=-1|Fragment\_3  
VGQCLNGATCIDLVDDY

>Locus\_12205\_Transcript\_1/3\_Confidence\_0.714\_Length\_2995|. |sp|  
P18168|SERR\_DROME Protein serrate OS=Drosophila melanogaster GN=Ser  
PE=1 SV=3|e=9.30868E-42|from=1766|to=2995|frame=-1|Fragment\_4  
HCACASGYTGRDCSQDVDECQTNPCHRGECVDLVGGFRCICPVGRSGTLCEDDIDRCAP  
NPCQNGAECLNTPGGYYCHCPGGLTGRHCEGPRHPVLANDGMPNPCQNGTCLLGGPNG  
AAFTCLCSAGTRGRLCSEMSNSGVIGGSEDDCEGVTGRCLNGGICDLQRGRCNCLAGWTG

>Locus\_12205\_Transcript\_1/3\_Confidence\_0.714\_Length\_2995|. |sp|  
P18168|SERR\_DROME Protein serrate OS=Drosophila melanogaster GN=Ser  
PE=1 SV=3|e=9.30868E-42|from=1766|to=2995|frame=-1|Fragment\_5  
PQC

>Locus\_12205\_Transcript\_1/3\_Confidence\_0.714\_Length\_2995|. |sp|  
P18168|SERR\_DROME Protein serrate OS=Drosophila melanogaster GN=Ser  
PE=1 SV=3|e=9.30868E-42|from=1766|to=2995|frame=-1|Fragment\_6  
EEPLDQCH

>Locus\_12205\_Transcript\_1/3\_Confidence\_0.714\_Length\_2995|. |sp|  
P18168|SERR\_DROME Protein serrate OS=Drosophila melanogaster GN=Ser  
PE=1 SV=3|e=9.30868E-42|from=1766|to=2995|frame=-1|Fragment\_7  
GEPCHNGGTCVGGPGWFRCECSRFTGPDICRINVNECASSPCQGGAPCKDRIGGYTCLCP  
PGRAGERCEIETSGSGCWAPPNSTWLNE

>Locus\_12205\_Transcript\_1/3\_Confidence\_0.714\_Length\_2995|. |sp|  
P18168|SERR\_DROME Protein serrate OS=Drosophila melanogaster GN=Ser  
PE=1 SV=3|e=9.30868E-42|from=1766|to=2995|frame=-1|Fragment\_8  
CNTCTCVQGIQR

>Locus\_12205\_Transcript\_3/3\_Confidence\_0.714\_Length\_2995|. |sp|  
P18168|SERR\_DROME Protein serrate OS=Drosophila melanogaster GN=Ser  
PE=1 SV=3|e=9.30868E-42|from=1766|to=2995|frame=-1|Fragment\_1  
NAANGYQCLCDAGWEGPNCETNIDDCVGNPCEHG

>Locus\_12205\_Transcript\_3/3\_Confidence\_0.714\_Length\_2995|. |sp|  
P18168|SERR\_DROME Protein serrate OS=Drosophila melanogaster GN=Ser  
PE=1 SV=3|e=9.30868E-42|from=1766|to=2995|frame=-1|Fragment\_2  
GSCIDLVDGFRCECPSEWTGEHCETDVDECLSSPCANAVSCSNTHGGFHCTCAPGWGGAL  
CARNIDDC

>Locus\_12205\_Transcript\_3/3\_Confidence\_0.714\_Length\_2995|. |sp|  
P18168|SERR\_DROME Protein serrate OS=Drosophila melanogaster GN=Ser  
PE=1 SV=3|e=9.30868E-42|from=1766|to=2995|frame=-1|Fragment\_3  
VGQCLNGATCIDLVDDY

>Locus\_12205\_Transcript\_3/3\_Confidence\_0.714\_Length\_2995|. |sp|  
P18168|SERR\_DROME Protein serrate OS=Drosophila melanogaster GN=Ser  
PE=1 SV=3|e=9.30868E-42|from=1766|to=2995|frame=-1|Fragment\_4  
HCACASGYTGRDCSQDVDECQTNPCHRGECVDLVGGFRCICPVGRSGTLCEDDIDRCAP  
NPCQNGAECLNTPGGYYCHCPGGLTGRHCEGPRHPVLANDGMPNPCQNGTCLLGGPNG  
AAFTCLCSAGTRGRLCSEMSNSGVIGGSEDDCEGVTGRCLNGGICDLQRGRCNCLAGWTG

>Locus\_12205\_Transcript\_3/3\_Confidence\_0.714\_Length\_2995|. |sp|  
P18168|SERR\_DROME Protein serrate OS=Drosophila melanogaster GN=Ser  
PE=1 SV=3|e=9.30868E-42|from=1766|to=2995|frame=-1|Fragment\_5  
PQC

>Locus\_12205\_Transcript\_3/3\_Confidence\_0.714\_Length\_2995|. |sp|  
P18168|SERR\_DROME Protein serrate OS=Drosophila melanogaster GN=Ser  
PE=1 SV=3|e=9.30868E-42|from=1766|to=2995|frame=-1|Fragment\_6  
EEPLDQCH

>Locus\_12205\_Transcript\_3/3\_Confidence\_0.714\_Length\_2995|. |sp|  
P18168|SERR\_DROME Protein serrate OS=Drosophila melanogaster GN=Ser  
PE=1 SV=3|e=9.30868E-42|from=1766|to=2995|frame=-1|Fragment\_7  
GEPCHNGGTCVGGPGWFRCECSRGTGPDICRINVNECASSPCQGGAPCKDRIGGYTCLCP  
PGRAGERCEIETSGSGCWAPPNSTWLNE

>Locus\_12205\_Transcript\_3/3\_Confidence\_0.714\_Length\_2995|. |sp|  
P18168|SERR\_DROME Protein serrate OS=Drosophila melanogaster GN=Ser  
PE=1 SV=3|e=9.30868E-42|from=1766|to=2995|frame=-1|Fragment\_8  
CNTCTCVQGIQR

>Locus\_12205\_Transcript\_1/3\_Confidence\_0.714\_Length\_2995|. |sp|  
P18168|SERR\_DROME Protein serrate OS=Drosophila melanogaster GN=Ser  
PE=1 SV=3|e=2.37268E-37|from=1655|to=2740|frame=-1|Fragment\_1  
CAPGWGG

>Locus\_12205\_Transcript\_1/3\_Confidence\_0.714\_Length\_2995|. |sp|  
P18168|SERR\_DROME Protein serrate OS=Drosophila melanogaster GN=Ser  
PE=1 SV=3|e=2.37268E-37|from=1655|to=2740|frame=-1|Fragment\_2  
ALCARNIDDCVGLNGATCIDLVDDYHCACASGYTGRDCSQDVDECQTNP

>Locus\_12205\_Transcript\_1/3\_Confidence\_0.714\_Length\_2995|. |sp|  
P18168|SERR\_DROME Protein serrate OS=Drosophila melanogaster GN=Ser  
PE=1 SV=3|e=2.37268E-37|from=1655|to=2740|frame=-1|Fragment\_3  
CRHGGECVDLVGGFRCICPVGRSGTLCEDDIDRCAPN

>Locus\_12205\_Transcript\_1/3\_Confidence\_0.714\_Length\_2995|. |sp|  
P18168|SERR\_DROME Protein serrate OS=Drosophila melanogaster GN=Ser  
PE=1 SV=3|e=2.37268E-37|from=1655|to=2740|frame=-1|Fragment\_4  
PCQNGAECLNT

>Locus\_12205\_Transcript\_1/3\_Confidence\_0.714\_Length\_2995|. |sp|  
P18168|SERR\_DROME Protein serrate OS=Drosophila melanogaster GN=Ser  
PE=1 SV=3|e=2.37268E-37|from=1655|to=2740|frame=-1|Fragment\_5  
PGGYYCHCPGGLTGRHCEGPRHPVLANDGCMNPQCQNGTCLLGGPNGAAFTCLCSAGTR  
GRLCSEMSNSGVIGGSEDDCEGVTGRCLNG

>Locus\_12205\_Transcript\_1/3\_Confidence\_0.714\_Length\_2995|. |sp|  
P18168|SERR\_DROME Protein serrate OS=Drosophila melanogaster GN=Ser  
PE=1 SV=3|e=2.37268E-37|from=1655|to=2740|frame=-1|Fragment\_6  
GICDLQRG

>Locus\_12205\_Transcript\_1/3\_Confidence\_0.714\_Length\_2995|. |sp|  
P18168|SERR\_DROME Protein serrate OS=Drosophila melanogaster GN=Ser  
PE=1 SV=3|e=2.37268E-37|from=1655|to=2740|frame=-1|Fragment\_7  
RCNCLAGWTGPQCEPLDQCHGEPCHNGGTCVGGPGWFRCECSRGTGPDICRINVNEC

>Locus\_12205\_Transcript\_1/3\_Confidence\_0.714\_Length\_2995|. |sp|  
P18168|SERR\_DROME Protein serrate OS=Drosophila melanogaster GN=Ser  
PE=1 SV=3|e=2.37268E-37|from=1655|to=2740|frame=-1|Fragment\_8  
ASSPCQGGAPCKDRIGGYTCLCPPGRAGERCEIETSGSGCWAPPNSTWLNECN

>Locus\_12205\_Transcript\_1/3\_Confidence\_0.714\_Length\_2995|. |sp|  
P18168|SERR\_DROME Protein serrate OS=Drosophila melanogaster GN=Ser  
PE=1 SV=3|e=2.37268E-37|from=1655|to=2740|frame=-1|Fragment\_9  
TCTCVQG

>Locus\_12205\_Transcript\_1/3\_Confidence\_0.714\_Length\_2995|. |sp|  
P18168|SERR\_DROME Protein serrate OS=Drosophila melanogaster GN=Ser  
PE=1 SV=3|e=2.37268E-37|from=1655|to=2740|frame=-1|Fragment\_10  
IQRCSNLWC

>Locus\_12205\_Transcript\_1/3\_Confidence\_0.714\_Length\_2995|. |sp|  
P18168|SERR\_DROME Protein serrate OS=Drosophila melanogaster GN=Ser  
PE=1 SV=3|e=2.37268E-37|from=1655|to=2740|frame=-1|Fragment\_11  
GLQDC

>Locus\_12205\_Transcript\_1/3\_Confidence\_0.714\_Length\_2995|. |sp|  
P18168|SERR\_DROME Protein serrate OS=Drosophila melanogaster GN=Ser  
PE=1 SV=3|e=2.37268E-37|from=1655|to=2740|frame=-1|Fragment\_12  
LGVNSTKC

>Locus\_12205\_Transcript\_1/3\_Confidence\_0.714\_Length\_2995|. |sp|  
P18168|SERR\_DROME Protein serrate OS=Drosophila melanogaster GN=Ser  
PE=1 SV=3|e=2.37268E-37|from=1655|to=2740|frame=-1|Fragment\_13  
APHEVCVPAP

>Locus\_12205\_Transcript\_1/3\_Confidence\_0.714\_Length\_2995|. |sp|  
P18168|SERR\_DROME Protein serrate OS=Drosophila melanogaster GN=Ser  
PE=1 SV=3|e=2.37268E-37|from=1655|to=2740|frame=-1|Fragment\_14  
QESCLSSP

>Locus\_12205\_Transcript\_3/3\_Confidence\_0.714\_Length\_2995|. |sp|  
P18168|SERR\_DROME Protein serrate OS=Drosophila melanogaster GN=Ser  
PE=1 SV=3|e=2.37268E-37|from=1655|to=2740|frame=-1|Fragment\_1  
CAPGWGG

>Locus\_12205\_Transcript\_3/3\_Confidence\_0.714\_Length\_2995|. |sp|  
P18168|SERR\_DROME Protein serrate OS=Drosophila melanogaster GN=Ser  
PE=1 SV=3|e=2.37268E-37|from=1655|to=2740|frame=-1|Fragment\_2  
ALCARNIDDCVQGCLNGATCIDLVDDYHCACASGYTGRDCSQDVDECQTNP

>Locus\_12205\_Transcript\_3/3\_Confidence\_0.714\_Length\_2995|. |sp|  
P18168|SERR\_DROME Protein serrate OS=Drosophila melanogaster GN=Ser  
PE=1 SV=3|e=2.37268E-37|from=1655|to=2740|frame=-1|Fragment\_3  
CRHGGECVDLVGGFRCICPVGRSGTLCEDDIDRCAPN

>Locus\_12205\_Transcript\_3/3\_Confidence\_0.714\_Length\_2995|. |sp|  
P18168|SERR\_DROME Protein serrate OS=Drosophila melanogaster GN=Ser  
PE=1 SV=3|e=2.37268E-37|from=1655|to=2740|frame=-1|Fragment\_4  
PCQNGAECLNT

>Locus\_12205\_Transcript\_3/3\_Confidence\_0.714\_Length\_2995|. |sp|  
P18168|SERR\_DROME Protein serrate OS=Drosophila melanogaster GN=Ser  
PE=1 SV=3|e=2.37268E-37|from=1655|to=2740|frame=-1|Fragment\_5  
PGGYCHCPGGLTGRHCEGPRHPVLANDGCMNPQCQNGTCLLGGPNGAAFTCLCSAGTR  
GRLCSEMSNSGVIGGSEDDCEGVTGRCLNG

>Locus\_12205\_Transcript\_3/3\_Confidence\_0.714\_Length\_2995|. |sp|  
P18168|SERR\_DROME Protein serrate OS=Drosophila melanogaster GN=Ser  
PE=1 SV=3|e=2.37268E-37|from=1655|to=2740|frame=-1|Fragment\_6  
GICDLQRG

>Locus\_12205\_Transcript\_3/3\_Confidence\_0.714\_Length\_2995|. |sp|  
P18168|SERR\_DROME Protein serrate OS=Drosophila melanogaster GN=Ser  
PE=1 SV=3|e=2.37268E-37|from=1655|to=2740|frame=-1|Fragment\_7  
RCNCLAGWTGPQCEPLDQCHGEPCHNGGTCVGGPGWFRCECSRFTGPDCRINVNEC

>Locus\_12205\_Transcript\_3/3\_Confidence\_0.714\_Length\_2995|. |sp|  
P18168|SERR\_DROME Protein serrate OS=Drosophila melanogaster GN=Ser  
PE=1 SV=3|e=2.37268E-37|from=1655|to=2740|frame=-1|Fragment\_8  
ASSPCQGGAPCKDRIGGYTCLCPPGRAGERCEIETS GSGCWAPPNSTWLNECN

>Locus\_12205\_Transcript\_3/3\_Confidence\_0.714\_Length\_2995|. |sp|  
P18168|SERR\_DROME Protein serrate OS=Drosophila melanogaster GN=Ser  
PE=1 SV=3|e=2.37268E-37|from=1655|to=2740|frame=-1|Fragment\_9  
TCTCVQG

>Locus\_12205\_Transcript\_3/3\_Confidence\_0.714\_Length\_2995|. |sp|  
P18168|SERR\_DROME Protein serrate OS=Drosophila melanogaster GN=Ser  
PE=1 SV=3|e=2.37268E-37|from=1655|to=2740|frame=-1|Fragment\_10  
IQRCSNLWC

>Locus\_12205\_Transcript\_3/3\_Confidence\_0.714\_Length\_2995|. |sp|

P18168|SERR\_DROME Protein serrate OS=Drosophila melanogaster GN=Ser  
PE=1 SV=3|e=2.37268E-37|from=1655|to=2740|frame=-1|Fragment\_11  
GLQDC

>Locus\_12205\_Transcript\_3/3\_Confidence\_0.714\_Length\_2995|. |sp|  
P18168|SERR\_DROME Protein serrate OS=Drosophila melanogaster GN=Ser  
PE=1 SV=3|e=2.37268E-37|from=1655|to=2740|frame=-1|Fragment\_12  
LGVNSTKC

>Locus\_12205\_Transcript\_3/3\_Confidence\_0.714\_Length\_2995|. |sp|  
P18168|SERR\_DROME Protein serrate OS=Drosophila melanogaster GN=Ser  
PE=1 SV=3|e=2.37268E-37|from=1655|to=2740|frame=-1|Fragment\_13  
APHEVCVPAP

>Locus\_12205\_Transcript\_3/3\_Confidence\_0.714\_Length\_2995|. |sp|  
P18168|SERR\_DROME Protein serrate OS=Drosophila melanogaster GN=Ser  
PE=1 SV=3|e=2.37268E-37|from=1655|to=2740|frame=-1|Fragment\_14  
QESCLSSP

>Locus\_12205\_Transcript\_1/3\_Confidence\_0.714\_Length\_2995|. |sp|  
P18168|SERR\_DROME Protein serrate OS=Drosophila melanogaster GN=Ser  
PE=1 SV=3|e=2.38925E-13|from=1922|to=2560|frame=-1|Fragment\_1  
HGGECVDLVGGFRCICPVGRSGTLCEDDIDRCAPNPCQNGAECLNTPGGYYCHCPGGLTG  
RHCEGPRHPVLANDGMPNPCQNGTCLLGGPNGAAFTCLCSAGTRGRLCSEMSNSGVIG  
GSEDDCEGVTGRCLNGGICDLQRGRNCNLAGWTGPQCEEPLDQCHG

>Locus\_12205\_Transcript\_1/3\_Confidence\_0.714\_Length\_2995|. |sp|  
P18168|SERR\_DROME Protein serrate OS=Drosophila melanogaster GN=Ser  
PE=1 SV=3|e=2.38925E-13|from=1922|to=2560|frame=-1|Fragment\_2  
EPCHNGGTCVG

>Locus\_12205\_Transcript\_1/3\_Confidence\_0.714\_Length\_2995|. |sp|  
P18168|SERR\_DROME Protein serrate OS=Drosophila melanogaster GN=Ser  
PE=1 SV=3|e=2.38925E-13|from=1922|to=2560|frame=-1|Fragment\_3  
GPGWFRCECSRGTGPDCRINVNECASSPCQGGAPC

>Locus\_12205\_Transcript\_3/3\_Confidence\_0.714\_Length\_2995|. |sp|  
P18168|SERR\_DROME Protein serrate OS=Drosophila melanogaster GN=Ser  
PE=1 SV=3|e=2.38925E-13|from=1922|to=2560|frame=-1|Fragment\_1  
HGGECVDLVGGFRCICPVGRSGTLCEDDIDRCAPNPCQNGAECLNTPGGYYCHCPGGLTG  
RHCEGPRHPVLANDGMPNPCQNGTCLLGGPNGAAFTCLCSAGTRGRLCSEMSNSGVIG  
GSEDDCEGVTGRCLNGGICDLQRGRNCNLAGWTGPQCEEPLDQCHG

>Locus\_12205\_Transcript\_3/3\_Confidence\_0.714\_Length\_2995|. |sp|  
P18168|SERR\_DROME Protein serrate OS=Drosophila melanogaster GN=Ser  
PE=1 SV=3|e=2.38925E-13|from=1922|to=2560|frame=-1|Fragment\_2  
EPCHNGGTCVG

>Locus\_12205\_Transcript\_3/3\_Confidence\_0.714\_Length\_2995|. |sp|  
P18168|SERR\_DROME Protein serrate OS=Drosophila melanogaster GN=Ser  
PE=1 SV=3|e=2.38925E-13|from=1922|to=2560|frame=-1|Fragment\_3  
GPGWFRCECSRGTGPDCRINVNECASSPCQGGAPC

>Locus\_12205\_Transcript\_2/3\_Confidence\_0.571\_Length\_2677|. |sp|  
P18168|SERR\_DROME Protein serrate OS=Drosophila melanogaster GN=Ser  
PE=1 SV=3|e=2.0851E-170|from=509|to=2674|frame=-1|Fragment\_1  
NGATCIDLVDDYHCACASGYTGRDQSDVDECQTNPCRHHGGECVDLVGGFRCICPVGRSG  
TLCEDDIDRCAPNPCQNGAECLNTPGGYYCHCPGGLTGRHCEGPRHPVLA

>Locus\_12205\_Transcript\_2/3\_Confidence\_0.571\_Length\_2677|. |sp|  
P18168|SERR\_DROME Protein serrate OS=Drosophila melanogaster GN=Ser  
PE=1 SV=3|e=2.0851E-170|from=509|to=2674|frame=-1|Fragment\_2  
NDGMPN

>Locus\_12205\_Transcript\_2/3\_Confidence\_0.571\_Length\_2677|. |sp|  
P18168|SERR\_DROME Protein serrate OS=Drosophila melanogaster GN=Ser

PE=1 SV=3|e=2.0851E-170|from=509|to=2674|frame=-1|Fragment\_3  
PCQNNGTCLLGGPNGAAFTCLCSAGTRGRLC  
>Locus\_12205\_Transcript\_2/3\_Confidence\_0.571\_Length\_2677|. |sp|  
P18168|SERR\_DROME Protein serrate OS=Drosophila melanogaster GN=Ser  
PE=1 SV=3|e=2.0851E-170|from=509|to=2674|frame=-1|Fragment\_4  
SEMSNSGVI  
>Locus\_12205\_Transcript\_2/3\_Confidence\_0.571\_Length\_2677|. |sp|  
P18168|SERR\_DROME Protein serrate OS=Drosophila melanogaster GN=Ser  
PE=1 SV=3|e=2.0851E-170|from=509|to=2674|frame=-1|Fragment\_5  
GGSEDDCEGVT  
>Locus\_12205\_Transcript\_2/3\_Confidence\_0.571\_Length\_2677|. |sp|  
P18168|SERR\_DROME Protein serrate OS=Drosophila melanogaster GN=Ser  
PE=1 SV=3|e=2.0851E-170|from=509|to=2674|frame=-1|Fragment\_6  
GRCLNGGIC  
>Locus\_12205\_Transcript\_2/3\_Confidence\_0.571\_Length\_2677|. |sp|  
P18168|SERR\_DROME Protein serrate OS=Drosophila melanogaster GN=Ser  
PE=1 SV=3|e=2.0851E-170|from=509|to=2674|frame=-1|Fragment\_7  
DLQRGRCNCLAGWTGPOCEEPLDQCHGEPCHNGGTCVGGPGWFRCECSRGTGPDCRINV  
NECASSPCQGGAPCKDRIGGYTCLCPPGRAGERCEIETSG  
>Locus\_12205\_Transcript\_2/3\_Confidence\_0.571\_Length\_2677|. |sp|  
P18168|SERR\_DROME Protein serrate OS=Drosophila melanogaster GN=Ser  
PE=1 SV=3|e=2.0851E-170|from=509|to=2674|frame=-1|Fragment\_8  
SGCWAPPNS  
>Locus\_12205\_Transcript\_2/3\_Confidence\_0.571\_Length\_2677|. |sp|  
P18168|SERR\_DROME Protein serrate OS=Drosophila melanogaster GN=Ser  
PE=1 SV=3|e=2.0851E-170|from=509|to=2674|frame=-1|Fragment\_9  
TWLN  
>Locus\_12205\_Transcript\_2/3\_Confidence\_0.571\_Length\_2677|. |sp|  
P18168|SERR\_DROME Protein serrate OS=Drosophila melanogaster GN=Ser  
PE=1 SV=3|e=2.0851E-170|from=509|to=2674|frame=-1|Fragment\_10  
ECNTCTCVQGIQRCSNLWCGLQDCLGVN  
>Locus\_12205\_Transcript\_2/3\_Confidence\_0.571\_Length\_2677|. |sp|  
P18168|SERR\_DROME Protein serrate OS=Drosophila melanogaster GN=Ser  
PE=1 SV=3|e=2.0851E-170|from=509|to=2674|frame=-1|Fragment\_11  
STKCAPHEVCVPAPQESCLSSPCTARGDCRALEPSRRVAPPALPASPDCWPNQAAALGEQC  
ARVSALLETGKAPRGATSETLCDALRTLGLARLVREPTADLRH  
>Locus\_12205\_Transcript\_2/3\_Confidence\_0.571\_Length\_2677|. |sp|  
P18168|SERR\_DROME Protein serrate OS=Drosophila melanogaster GN=Ser  
PE=1 SV=3|e=2.0851E-170|from=509|to=2674|frame=-1|Fragment\_12  
IVVVLCEMKTGSNDTVEVTVSSPPGGNAGAQIVALSVRLLGELISRGAAS  
>Locus\_12205\_Transcript\_2/3\_Confidence\_0.571\_Length\_2677|. |sp|  
P18168|SERR\_DROME Protein serrate OS=Drosophila melanogaster GN=Ser  
PE=1 SV=3|e=2.0851E-170|from=509|to=2674|frame=-1|Fragment\_13  
SDGALPGAIREVKVETALLSSETQGGEYFIALICVMSIIVLAAVVLGIFVMRQMRGRSI  
SGMGLTPSPDAFRAEEEEKSNLQNEENFRRYANPLKEE  
>Locus\_12205\_Transcript\_2/3\_Confidence\_0.571\_Length\_2677|. |sp|  
P18168|SERR\_DROME Protein serrate OS=Drosophila melanogaster GN=Ser  
PE=1 SV=3|e=2.0851E-170|from=509|to=2674|frame=-1|Fragment\_14  
SIELSPKVSVEMHKSSQDLNPNVSLVRPIGREALAGPSTTAQDFMHEYSQRLHKNKSL  
NPDLVHVDADLLHVDCNLKTAH  
>Locus\_12205\_Transcript\_2/3\_Confidence\_0.571\_Length\_2677|. |sp|  
P18168|SERR\_DROME Protein serrate OS=Drosophila melanogaster GN=Ser  
PE=1 SV=3|e=2.0851E-170|from=509|to=2674|frame=-1|Fragment\_15  
RNSQILLYKAQNPDMRKNNTGTFDNLNKDFGKRSINM

>Locus\_12205\_Transcript\_2/3\_Confidence\_0.571\_Length\_2677|. |sp|  
P18168|SERR\_DROME Protein serrate OS=Drosophila melanogaster GN=Ser  
PE=1 SV=3|e=2.0851E-170|from=509|to=2674|frame=-1|Fragment\_16  
STASSDSVLTVLV

>Locus\_12205\_Transcript\_2/3\_Confidence\_0.571\_Length\_2677|. |sp|  
P18168|SERR\_DROME Protein serrate OS=Drosophila melanogaster GN=Ser  
PE=1 SV=3|e=3.33839E-43|from=1859|to=2653|frame=-1|Fragment\_1  
LVDDYHCACASGYTGRDCSQDVDECQTNPCRHHGECVDLVGGFRCICPVGRSGTLCEDDI  
DRC

>Locus\_12205\_Transcript\_2/3\_Confidence\_0.571\_Length\_2677|. |sp|  
P18168|SERR\_DROME Protein serrate OS=Drosophila melanogaster GN=Ser  
PE=1 SV=3|e=3.33839E-43|from=1859|to=2653|frame=-1|Fragment\_2  
APNPCQNGAECLNTPGGYYCHCPGLTGRHCEGPRHPVLAN DGMPNPCQNGTCLLGGP  
NGAAFTCLCSAGTRGRLCSEMSNSGVIGGSEDDCEGVTGRCLNGGIC

>Locus\_12205\_Transcript\_2/3\_Confidence\_0.571\_Length\_2677|. |sp|  
P18168|SERR\_DROME Protein serrate OS=Drosophila melanogaster GN=Ser  
PE=1 SV=3|e=3.33839E-43|from=1859|to=2653|frame=-1|Fragment\_3  
DLQRG

>Locus\_12205\_Transcript\_2/3\_Confidence\_0.571\_Length\_2677|. |sp|  
P18168|SERR\_DROME Protein serrate OS=Drosophila melanogaster GN=Ser  
PE=1 SV=3|e=3.33839E-43|from=1859|to=2653|frame=-1|Fragment\_4  
RCNCLAGWTGPQCEEPLDQCHGEPCHNGGTCVGGPGWFRCECSRGTGPDCRINVNECAS  
SPCQGGAPCKDRIGGYTCLCPPGRAGERCE

>Locus\_12205\_Transcript\_2/3\_Confidence\_0.571\_Length\_2677|. |sp|  
P18168|SERR\_DROME Protein serrate OS=Drosophila melanogaster GN=Ser  
PE=1 SV=3|e=1.77428E-36|from=1574|to=2674|frame=-1|Fragment\_1  
NGATCIDLVDDYHCACASGYTGRDCSQDVDECQT

>Locus\_12205\_Transcript\_2/3\_Confidence\_0.571\_Length\_2677|. |sp|  
P18168|SERR\_DROME Protein serrate OS=Drosophila melanogaster GN=Ser  
PE=1 SV=3|e=1.77428E-36|from=1574|to=2674|frame=-1|Fragment\_2  
NPCRHGGECVDLVGGFRCICPVGRSGTLCEDDIDRCAPNPCQNGAECLNTPGGYYCHCPG  
GLTGRHCEGPRHPVLAN DGMPNPCQNGTCLLGGPNGAAFTCLCSAGTRGRLCSEMSNS  
GVIGGSEDDCEGVTGRCLNGGICDLQRG

>Locus\_12205\_Transcript\_2/3\_Confidence\_0.571\_Length\_2677|. |sp|  
P18168|SERR\_DROME Protein serrate OS=Drosophila melanogaster GN=Ser  
PE=1 SV=3|e=1.77428E-36|from=1574|to=2674|frame=-1|Fragment\_3  
RCNCLAGWTGPQCEEPLDQCHGEPCHNG

>Locus\_12205\_Transcript\_2/3\_Confidence\_0.571\_Length\_2677|. |sp|  
P18168|SERR\_DROME Protein serrate OS=Drosophila melanogaster GN=Ser  
PE=1 SV=3|e=1.77428E-36|from=1574|to=2674|frame=-1|Fragment\_4  
GTCVGGPGWFRCECSRGTGPDCRINVNECASSPCQGGAPCKDRIGGYTCLCPPGRAGER  
CEIETSGSGCWAPPNSTWLNEC

>Locus\_12205\_Transcript\_2/3\_Confidence\_0.571\_Length\_2677|. |sp|  
P18168|SERR\_DROME Protein serrate OS=Drosophila melanogaster GN=Ser  
PE=1 SV=3|e=1.77428E-36|from=1574|to=2674|frame=-1|Fragment\_5  
NTCTCVQGIQ

>Locus\_12205\_Transcript\_2/3\_Confidence\_0.571\_Length\_2677|. |sp|  
P18168|SERR\_DROME Protein serrate OS=Drosophila melanogaster GN=Ser  
PE=1 SV=3|e=1.77428E-36|from=1574|to=2674|frame=-1|Fragment\_6  
RCSNLWCGLQDCLGVNSTKCAPHEVCVPAPQESCLSSPCTARGDCRALEPSRRVAPPALP  
ASPDC

>Locus\_12205\_Transcript\_2/3\_Confidence\_0.571\_Length\_2677|. |sp|  
P18168|SERR\_DROME Protein serrate OS=Drosophila melanogaster GN=Ser  
PE=1 SV=3|e=8.80565E-36|from=1655|to=2635|frame=-1|Fragment\_1

CACASGYTGRDCSQDVDECQTNP

>Locus\_12205\_Transcript\_2/3\_Confidence\_0.571\_Length\_2677|. |sp|  
P18168|SERR\_DROME Protein serrate OS=Drosophila melanogaster GN=Ser  
PE=1 SV=3|e=8.80565E-36|from=1655|to=2635|frame=-1|Fragment\_2  
CRHGECVDLVGGFRCICPVGRSGTLCEDDIDRCAPN

>Locus\_12205\_Transcript\_2/3\_Confidence\_0.571\_Length\_2677|. |sp|  
P18168|SERR\_DROME Protein serrate OS=Drosophila melanogaster GN=Ser  
PE=1 SV=3|e=8.80565E-36|from=1655|to=2635|frame=-1|Fragment\_3  
PCQNGAECLNT

>Locus\_12205\_Transcript\_2/3\_Confidence\_0.571\_Length\_2677|. |sp|  
P18168|SERR\_DROME Protein serrate OS=Drosophila melanogaster GN=Ser  
PE=1 SV=3|e=8.80565E-36|from=1655|to=2635|frame=-1|Fragment\_4  
PGGYYCHCPGGLTGRHCEGPRHPVLANDGCMNPQCQNGTCLLGGPNGAAFTCLCSAGTR  
GRLCSEMSNSGVIGGSEDDCEGVTGRCLNG

>Locus\_12205\_Transcript\_2/3\_Confidence\_0.571\_Length\_2677|. |sp|  
P18168|SERR\_DROME Protein serrate OS=Drosophila melanogaster GN=Ser  
PE=1 SV=3|e=8.80565E-36|from=1655|to=2635|frame=-1|Fragment\_5  
GICDLQRG

>Locus\_12205\_Transcript\_2/3\_Confidence\_0.571\_Length\_2677|. |sp|  
P18168|SERR\_DROME Protein serrate OS=Drosophila melanogaster GN=Ser  
PE=1 SV=3|e=8.80565E-36|from=1655|to=2635|frame=-1|Fragment\_6  
RCNCLAGWTGPQCEEPLDQCHGEPCHNGGTCVGGPGWFRCECSRFTGPDCRINVNEC

>Locus\_12205\_Transcript\_2/3\_Confidence\_0.571\_Length\_2677|. |sp|  
P18168|SERR\_DROME Protein serrate OS=Drosophila melanogaster GN=Ser  
PE=1 SV=3|e=8.80565E-36|from=1655|to=2635|frame=-1|Fragment\_7  
ASSPCQGGAPCKDRIGGYTCLCPPGRAGERCEIETSGSGCWAPPNSTWLNECN

>Locus\_12205\_Transcript\_2/3\_Confidence\_0.571\_Length\_2677|. |sp|  
P18168|SERR\_DROME Protein serrate OS=Drosophila melanogaster GN=Ser  
PE=1 SV=3|e=8.80565E-36|from=1655|to=2635|frame=-1|Fragment\_8  
TCTCVQG

>Locus\_12205\_Transcript\_2/3\_Confidence\_0.571\_Length\_2677|. |sp|  
P18168|SERR\_DROME Protein serrate OS=Drosophila melanogaster GN=Ser  
PE=1 SV=3|e=8.80565E-36|from=1655|to=2635|frame=-1|Fragment\_9  
IQRCSNLWC

>Locus\_12205\_Transcript\_2/3\_Confidence\_0.571\_Length\_2677|. |sp|  
P18168|SERR\_DROME Protein serrate OS=Drosophila melanogaster GN=Ser  
PE=1 SV=3|e=8.80565E-36|from=1655|to=2635|frame=-1|Fragment\_10  
GLQDC

>Locus\_12205\_Transcript\_2/3\_Confidence\_0.571\_Length\_2677|. |sp|  
P18168|SERR\_DROME Protein serrate OS=Drosophila melanogaster GN=Ser  
PE=1 SV=3|e=8.80565E-36|from=1655|to=2635|frame=-1|Fragment\_11  
LGVNSTKC

>Locus\_12205\_Transcript\_2/3\_Confidence\_0.571\_Length\_2677|. |sp|  
P18168|SERR\_DROME Protein serrate OS=Drosophila melanogaster GN=Ser  
PE=1 SV=3|e=8.80565E-36|from=1655|to=2635|frame=-1|Fragment\_12  
APHEVCVPAP

>Locus\_12205\_Transcript\_2/3\_Confidence\_0.571\_Length\_2677|. |sp|  
P18168|SERR\_DROME Protein serrate OS=Drosophila melanogaster GN=Ser  
PE=1 SV=3|e=8.80565E-36|from=1655|to=2635|frame=-1|Fragment\_13  
QESCLSSP

>Locus\_12205\_Transcript\_2/3\_Confidence\_0.571\_Length\_2677|. |sp|  
P18168|SERR\_DROME Protein serrate OS=Drosophila melanogaster GN=Ser  
PE=1 SV=3|e=2.11052E-13|from=1922|to=2560|frame=-1|Fragment\_1  
HGGEVDLVGGFRCICPVGRSGTLCEDDIDRCAPNCPQNGAECLNTPGGYYCHCPGGLTG

RHCEGPRHPVLANDGCMPCQNGTCLLGGPNGAAFTCLCSAGTRGRLCSEMSNSGVIG  
GSEDDCEGVTGRCLNGGICDLQRGRNCNLAGWTGPQCEEPLDQCHG  
>Locus\_12205\_Transcript\_2/3\_Confidence\_0.571\_Length\_2677|. |sp|  
P18168|SERR\_DROME Protein serrate OS=Drosophila melanogaster GN=Ser  
PE=1 SV=3|e=2.11052E-13|from=1922|to=2560|frame=-1|Fragment\_2  
EPCHNGGTCVG  
>Locus\_12205\_Transcript\_2/3\_Confidence\_0.571\_Length\_2677|. |sp|  
P18168|SERR\_DROME Protein serrate OS=Drosophila melanogaster GN=Ser  
PE=1 SV=3|e=2.11052E-13|from=1922|to=2560|frame=-1|Fragment\_3  
GPGWFRCECSRGTGPDCRINVNECASSPCQGGAPC

>Locus\_621\_Transcript\_1/1\_Confidence\_1.000\_Length\_1216|UNIGENE  
REPRESENTATIVE TRANSCRIPT|sp|P23380|VATL\_DROME V-type proton ATPase  
16 kDa proteolipid subunit OS=Drosophila melanogaster GN=Vha16-1  
PE=2 SV=1|e=6.43404E-35|from=2|to=232|frame=2|Fragment\_1  
EEPKTYSLYKGFIIHLGAGLAVGFSLAAGFAIGIVGDAGVRGTAQQPRLFVGMILILIFA  
EVLGLYLIVAIYLYTK

>Locus\_24204\_Transcript\_1/2\_Confidence\_0.750\_Length\_679|UNIGENE  
REPRESENTATIVE TRANSCRIPT|sp|P25722|HS2ST\_DROME Heparin sulfate 0-  
sulfotransferase OS=Drosophila melanogaster GN=Hs2st PE=2 SV=2|  
e=2.47527E-73|from=1|to=555|frame=1|Fragment\_1  
KPLDRLVSYYYFLRNGDNFRPYLMRKKHGNKMTFDECVELKQPDCDPNNMWLQIPFLCGH  
AAECWEPGSRWALEEAKRNLINNYFLVGLTEQLEDFIRILENSLPRIFKGATEYYQTSNK  
SHLRQTVAKLEPMEKTVAAIKKSIAIWQMENDLYQFAANHFVHVKKKFLTP

>Locus\_24204\_Transcript\_1/2\_Confidence\_0.750\_Length\_679|UNIGENE  
REPRESENTATIVE TRANSCRIPT|sp|P25722|HS2ST\_DROME Heparin sulfate 0-  
sulfotransferase OS=Drosophila melanogaster GN=Hs2st PE=2 SV=2|  
e=2.47527E-73|from=1|to=555|frame=1|Fragment\_2  
NGLPQTFFYEKIRPK

>Locus\_24204\_Transcript\_2/2\_Confidence\_0.500\_Length\_559|. |sp|P25722|  
HS2ST\_DROME Heparin sulfate 0-sulfotransferase OS=Drosophila  
melanogaster GN=Hs2st PE=2 SV=2|e=8.88843E-54|from=1|to=435|frame=1|  
Fragment\_1  
KQPDCDPNNMWLQIPFLCGHAAECWEPGSRWALEEAKRNLINNYFLVGLTEQLEDFIRIL  
ENSLPRIFKGATEYYQTSNKSHLRQTVAKLEPMEKTVAAIKKSIAIWQMENDLYQFAANHF  
AHVKKKFLTP

>Locus\_24204\_Transcript\_2/2\_Confidence\_0.500\_Length\_559|. |sp|P25722|  
HS2ST\_DROME Heparin sulfate 0-sulfotransferase OS=Drosophila  
melanogaster GN=Hs2st PE=2 SV=2|e=8.88843E-54|from=1|to=435|frame=1|  
Fragment\_2  
NGLPQTFFYEKIRPK

>Locus\_22709\_Transcript\_1/1\_Confidence\_1.000\_Length\_236|. |sp|P25722|  
HS2ST\_DROME Heparin sulfate 0-sulfotransferase OS=Drosophila  
melanogaster GN=Hs2st PE=2 SV=2|e=1.50874E-36|from=3|to=236|  
frame=-1|Fragment\_1  
KPLDRLVSYYYFLRNGDNFRPYLMRKKHGNKMTFDECVELKQPDCDPNNMWLQIPFLCGH  
AAECWEPGSRWALEEAKR

>Locus\_5606\_Transcript\_1/4\_Confidence\_0.700\_Length\_721|UNIGENE  
REPRESENTATIVE TRANSCRIPT|sp|P25931|NPYR\_DROME Neuropeptide Y  
receptor OS=Drosophila melanogaster GN=NepYr PE=2 SV=2|  
e=2.56134E-71|from=116|to=721|frame=-1|Fragment\_1  
SVDRYMAIMWPLKPRLTKRSKAIIVLVWAI AFLTALPIPAVSKLSQPAS

>Locus\_5606\_Transcript\_1/4\_Confidence\_0.700\_Length\_721|UNIGENE REPRESENTATIVE TRANSCRIPT|sp|P25931|NPYR\_DROME Neuropeptide Y receptor OS=Drosophila melanogaster GN=NepYr PE=2 SV=2|e=2.56134E-71|from=116|to=721|frame=-1|Fragment\_2  
WHQECNKVICREEWPSERHSYYYYSMALMGLQFVAPLAVLMFTYTRIAIAVWGKRPPGEAV  
DSRDQRMARSKR

>Locus\_5606\_Transcript\_1/4\_Confidence\_0.700\_Length\_721|UNIGENE REPRESENTATIVE TRANSCRIPT|sp|P25931|NPYR\_DROME Neuropeptide Y receptor OS=Drosophila melanogaster GN=NepYr PE=2 SV=2|e=2.56134E-71|from=116|to=721|frame=-1|Fragment\_3  
VCWMPFNILMVIWTNDESLGGWPPLPYVWFSFHWLAMS HSCYNPIIYCYMNARFRDGF AI  
LLSPVP

>Locus\_5605\_Transcript\_1/1\_Confidence\_1.000\_Length\_661|. |sp|P25931|NPYR\_DROME Neuropeptide Y receptor OS=Drosophila melanogaster GN=NepYr PE=2 SV=2|e=1.12508E-51|from=207|to=659|frame=3|Fragment\_1  
SFNCDESFL

>Locus\_5605\_Transcript\_1/1\_Confidence\_1.000\_Length\_661|. |sp|P25931|NPYR\_DROME Neuropeptide Y receptor OS=Drosophila melanogaster GN=NepYr PE=2 SV=2|e=1.12508E-51|from=207|to=659|frame=3|Fragment\_2  
QQPLSSSYFRALVYFLYCSIFFLAVAGNGLVCFIVQRSPRMRTVTNLFIVNLAVGDILMS  
VFCIPFTFVSILILHHPFGMIMCHLVNFSQAVSVLVSAYTLVAISVDRYMAIMWPLKPR  
LTKRSAKAIIVLVWAI AFLTAL

>Locus\_5606\_Transcript\_2/4\_Confidence\_0.600\_Length\_611|. |sp|P25931|NPYR\_DROME Neuropeptide Y receptor OS=Drosophila melanogaster GN=NepYr PE=2 SV=2|e=1.89475E-71|from=6|to=611|frame=-1|Fragment\_1  
SVDRYMAIMWPLKPR LTKRSAKAIIVLVWAI AFLTALPIPAVSKLSQPAS

>Locus\_5606\_Transcript\_2/4\_Confidence\_0.600\_Length\_611|. |sp|P25931|NPYR\_DROME Neuropeptide Y receptor OS=Drosophila melanogaster GN=NepYr PE=2 SV=2|e=1.89475E-71|from=6|to=611|frame=-1|Fragment\_2  
WHQECNKVICREEWPSERHSYYYYSMALMGLQFVAPLAVLMFTYTRIAIAVWGKRPPGEAV  
DSRDQRMARSKR

>Locus\_5606\_Transcript\_2/4\_Confidence\_0.600\_Length\_611|. |sp|P25931|NPYR\_DROME Neuropeptide Y receptor OS=Drosophila melanogaster GN=NepYr PE=2 SV=2|e=1.89475E-71|from=6|to=611|frame=-1|Fragment\_3  
VCWMPFNILMVIWTNDESLGGWPPLPYVWFSFHWLAMS HSCYNPIIYCYMNARFRDGF AI  
LLSPVP

>Locus\_5606\_Transcript\_3/4\_Confidence\_0.600\_Length\_611|. |sp|P25931|NPYR\_DROME Neuropeptide Y receptor OS=Drosophila melanogaster GN=NepYr PE=2 SV=2|e=1.89475E-71|from=6|to=611|frame=-1|Fragment\_1  
SVDRYMAIMWPLKPR LTKRSAKAIIVLVWAI AFLTALPIPAVSKLSQPAS

>Locus\_5606\_Transcript\_3/4\_Confidence\_0.600\_Length\_611|. |sp|P25931|NPYR\_DROME Neuropeptide Y receptor OS=Drosophila melanogaster GN=NepYr PE=2 SV=2|e=1.89475E-71|from=6|to=611|frame=-1|Fragment\_2  
WHQECNKVICREEWPSERHSYYYYSMALMGLQFVAPLAVLMFTYTRIAIAVWGKRPPGEAV  
DSRDQRMARSKR

>Locus\_5606\_Transcript\_3/4\_Confidence\_0.600\_Length\_611|. |sp|P25931|NPYR\_DROME Neuropeptide Y receptor OS=Drosophila melanogaster GN=NepYr PE=2 SV=2|e=1.89475E-71|from=6|to=611|frame=-1|Fragment\_3  
VCWMPFNILMVIWTNDESLGGWPPLPYVWFSFHWLAMS HSCYNPIIYCYMNARFRDGF AI  
LLSPVP

>Locus\_5606\_Transcript\_4/4\_Confidence\_0.600\_Length\_611|. |sp|P25931|NPYR\_DROME Neuropeptide Y receptor OS=Drosophila melanogaster GN=NepYr PE=2 SV=2|e=1.89475E-71|from=6|to=611|frame=-1|Fragment\_1  
SVDRYMAIMWPLKPR LTKRSAKAIIVLVWAI AFLTALPIPAVSKLSQPAS

>Locus\_5606\_Transcript\_4/4\_Confidence\_0.600\_Length\_611|. |sp|P25931|  
NPYR\_DROME Neuropeptide Y receptor OS=Drosophila melanogaster  
GN=NepYr PE=2 SV=2|e=1.89475E-71|from=6|to=611|frame=-1|Fragment\_2  
WHQECNKVICREEWPSERHSYYSMALMGLQFVAPLAVLMFTYTRIAIAVWGKRPPGEAV  
DSRDQRMARSKR

>Locus\_5606\_Transcript\_4/4\_Confidence\_0.600\_Length\_611|. |sp|P25931|  
NPYR\_DROME Neuropeptide Y receptor OS=Drosophila melanogaster  
GN=NepYr PE=2 SV=2|e=1.89475E-71|from=6|to=611|frame=-1|Fragment\_3  
VCWMPFNILMVIWTNDESLGGWPPLPYVWFHFLAMSHSCYNPIIYCYMNARFRDGFAL  
LLSPVP

>Locus\_14165\_Transcript\_3/5\_Confidence\_0.417\_Length\_437|. |sp|P25931|  
NPYR\_DROME Neuropeptide Y receptor OS=Drosophila melanogaster  
GN=NepYr PE=2 SV=2|e=1.06637E-48|from=16|to=432|frame=1|Fragment\_1  
SFNCDESFL

>Locus\_14165\_Transcript\_3/5\_Confidence\_0.417\_Length\_437|. |sp|P25931|  
NPYR\_DROME Neuropeptide Y receptor OS=Drosophila melanogaster  
GN=NepYr PE=2 SV=2|e=1.06637E-48|from=16|to=432|frame=1|Fragment\_2  
QQPLSSSYFRALVYFLYCSIFFLAVAGNGLVCFIVQRSPRMRTVTNLFIVNLAVGDILMS  
VFCIPFTFVSILILHHWPFGMIMCHLVNFSQAVSVLVSAITLVAISVDRYMAIMWPLKPR  
LTKRSAKAI

>Locus\_14165\_Transcript\_2/5\_Confidence\_0.417\_Length\_379|. |sp|P25931|  
NPYR\_DROME Neuropeptide Y receptor OS=Drosophila melanogaster  
GN=NepYr PE=2 SV=2|e=9.87922E-20|from=144|to=377|frame=3|Fragment\_1  
SFNCDESFL

>Locus\_14165\_Transcript\_2/5\_Confidence\_0.417\_Length\_379|. |sp|P25931|  
NPYR\_DROME Neuropeptide Y receptor OS=Drosophila melanogaster  
GN=NepYr PE=2 SV=2|e=9.87922E-20|from=144|to=377|frame=3|Fragment\_2  
QQPLSSSYFRALVYFLYCSIFFLAVAGNGLVCFIVQRSPRMRTVTNLFIVNLAVGDILMS  
VFCIPFTFV

>Locus\_14165\_Transcript\_4/5\_Confidence\_0.417\_Length\_379|. |sp|P25931|  
NPYR\_DROME Neuropeptide Y receptor OS=Drosophila melanogaster  
GN=NepYr PE=2 SV=2|e=9.87922E-20|from=144|to=377|frame=3|Fragment\_1  
SFNCDESFL

>Locus\_14165\_Transcript\_4/5\_Confidence\_0.417\_Length\_379|. |sp|P25931|  
NPYR\_DROME Neuropeptide Y receptor OS=Drosophila melanogaster  
GN=NepYr PE=2 SV=2|e=9.87922E-20|from=144|to=377|frame=3|Fragment\_2  
QQPLSSSYFRALVYFLYCSIFFLAVAGNGLVCFIVQRSPRMRTVTNLFIVNLAVGDILMS  
VFCIPFTFV

>Locus\_11928\_Transcript\_1/1\_Confidence\_1.000\_Length\_281|. |sp|P25931|  
NPYR\_DROME Neuropeptide Y receptor OS=Drosophila melanogaster  
GN=NepYr PE=2 SV=2|e=4.36867E-36|from=6|to=281|frame=-1|Fragment\_1  
VQRSPRMRTVTNLFIVNLAVGDILMSVFCIPFTFVSILILHHWPFGMIMCHLVNFSQAVS  
VLVSAYTLVAISVDRYMAIMWPLKPRLTKRSA

>Locus\_30558\_Transcript\_1/1\_Confidence\_1.000\_Length\_281|. |sp|P25931|  
NPYR\_DROME Neuropeptide Y receptor OS=Drosophila melanogaster  
GN=NepYr PE=2 SV=2|e=4.36867E-36|from=6|to=281|frame=-1|Fragment\_1  
VQRSPRMRTVTNLFIVNLAVGDILMSVFCIPFTFVSILILHHWPFGMIMCHLVNFSQAVS  
VLVSAYTLVAISVDRYMAIMWPLKPRLTKRSA

>Locus\_14165\_Transcript\_5/5\_Confidence\_0.333\_Length\_251|. |sp|P25931|  
NPYR\_DROME Neuropeptide Y receptor OS=Drosophila melanogaster  
GN=NepYr PE=2 SV=2|e=1.0062E-19|from=16|to=249|frame=1|Fragment\_1  
SFNCDESFL

>Locus\_14165\_Transcript\_5/5\_Confidence\_0.333\_Length\_251|. |sp|P25931|  
NPYR\_DROME Neuropeptide Y receptor OS=Drosophila melanogaster

GN=NepYr PE=2 SV=2|e=1.0062E-19|from=16|to=249|frame=1|Fragment\_2  
QQPLSSSYFRALVYFLYCSIFFLAVAGNGLVCFIVQRSPRMRTVTNLFIVNLAVGDILMS  
VFCIPFTFV

>Locus\_25112\_Transcript\_1/1\_Confidence\_1.000\_Length\_461|UNIGENE  
REPRESENTATIVE TRANSCRIPT|sp|P27716|INX1\_DROME Innexin inx1  
OS=Drosophila melanogaster GN=ogre PE=1 SV=1|e=1.26222E-69|from=21|  
to=461|frame=3|Fragment\_1

MYRLLGGLKDYFKVQDIKTDNAVFRHLNLFITAILLTCSMIITATQFVGNPIQCIVNGIP  
VHVVNTFCWVTSTFTMPDAHKRQVGLVQPGVGNDFGDEDAKKYYTYQWVCFVLFQA  
IMCYTPKFLWDSFEGGLMRTIVMGLNV

>Locus\_23801\_Transcript\_1/1\_Confidence\_1.000\_Length\_252|. |sp|P27716|  
INX1\_DROME Innexin inx1 OS=Drosophila melanogaster GN=ogre PE=1  
SV=1|e=1.31346E-11|from=115|to=252|frame=-1|Fragment\_1  
AISRKTDVGDWWIYMLGRNMDPLIYREVIAELAKKIETNSKETRA

>Locus\_30475\_Transcript\_1/1\_Confidence\_1.000\_Length\_242|UNIGENE  
REPRESENTATIVE TRANSCRIPT|"sp|P29993|ITPR\_DROME Inositol 1,4,5-  
trisphosphate receptor OS=Drosophila melanogaster GN=Itp-r83A PE=2  
SV=3"|e=1.35697E-37|from=3|to=239|frame=-1|Fragment\_1  
TTSFLHLGDIVSLYAEGNVCGFLSTLGLVDDRTVVCPEAGDLGNPPKKFRDCLFKICPMN  
RYSAQKQFWKAAKQSASAN

>Locus\_6988\_Transcript\_1/6\_Confidence\_0.615\_Length\_3850|UNIGENE  
REPRESENTATIVE TRANSCRIPT|"sp|P30430|FUR1C\_DROME Furin-like protease  
1, isoform 1-CRR OS=Drosophila melanogaster GN=Fur1 PE=2 SV=2"|e=0|  
from=1976|to=3844|frame=-1|Fragment\_1  
ANLVARDHGFINLGEIFNDHYHFHRAVPKRSKRSCDHRHRRLQSDSRVHVARQQRVKS  
QKRDLIALRP

>Locus\_6988\_Transcript\_1/6\_Confidence\_0.615\_Length\_3850|UNIGENE  
REPRESENTATIVE TRANSCRIPT|"sp|P30430|FUR1C\_DROME Furin-like protease  
1, isoform 1-CRR OS=Drosophila melanogaster GN=Fur1 PE=2 SV=2"|e=0|  
from=1976|to=3844|frame=-1|Fragment\_2  
RTNLRT

>Locus\_6988\_Transcript\_1/6\_Confidence\_0.615\_Length\_3850|UNIGENE  
REPRESENTATIVE TRANSCRIPT|"sp|P30430|FUR1C\_DROME Furin-like protease  
1, isoform 1-CRR OS=Drosophila melanogaster GN=Fur1 PE=2 SV=2"|e=0|  
from=1976|to=3844|frame=-1|Fragment\_3  
GIALNDQKWPQMWYLNRGSGLDNMVIPAWKEGITGKGVVVTILDDGLEKNHPDLIRNYDP  
QASYDVNSHDEDPMRYDMIDSNRHGTRCAGEVAATANNSLC

>Locus\_6988\_Transcript\_1/6\_Confidence\_0.615\_Length\_3850|UNIGENE  
REPRESENTATIVE TRANSCRIPT|"sp|P30430|FUR1C\_DROME Furin-like protease  
1, isoform 1-CRR OS=Drosophila melanogaster GN=Fur1 PE=2 SV=2"|e=0|  
from=1976|to=3844|frame=-1|Fragment\_4  
VRMLDGDVTDVEARSLSLNPQHIDIYSASWGPDDGKTVDGPGELATRAFIGVTKGRS  
GKGSIFVWASNGGREHDNCNCDGYTNSIWTLISSATERGLVPWYSEMCSSTLATTYSS  
GAQNEKQVITDHLHACTSSHTGTSASAPLAAGICALALEANRDLTWRDMQHIVVRTAKP  
ANLKSDDWATNGVGRNVSHSFGYGLMDAAAMVKLARTWKTVPQRRCEVSAPHIDKLIPP  
KSKVILQLPVSLCQGVNFLEHVQAKISLQASRRGDIQIHLTPGGTRVTLAARQNDASR  
SGFSNWPMSVHTWGESPOQLWHLEVHNEGRYMAKLTQWDLDFHGTQEPQESDVE

>Locus\_6988\_Transcript\_1/6\_Confidence\_0.615\_Length\_3850|UNIGENE  
REPRESENTATIVE TRANSCRIPT|"sp|P30430|FUR1C\_DROME Furin-like protease  
1, isoform 1-CRR OS=Drosophila melanogaster GN=Fur1 PE=2 SV=2"|e=0|  
from=1976|to=3844|frame=-1|Fragment\_5  
SVQYSANGGSNYPDGLHNSLETDTASGQWRDLHHVREGHIDVQRTASDDVTSSACISYN

DNHNCL

>Locus\_6988\_Transcript\_2/6\_Confidence\_0.615\_Length\_3850|.|"sp|  
P30430|FUR1C\_DROME Furin-like protease 1, isoform 1-CRR  
OS=Drosophila melanogaster GN=Fur1 PE=2 SV=2"|e=0|from=1976|to=3844|  
frame=-1|Fragment\_1  
ANLVARDHGFINLGEIFNDHYHFHRAVPRRSKRSCDHRHRRLQSDSRVHWARQQRVKSR  
QKRDLIALRP

>Locus\_6988\_Transcript\_2/6\_Confidence\_0.615\_Length\_3850|.|"sp|  
P30430|FUR1C\_DROME Furin-like protease 1, isoform 1-CRR  
OS=Drosophila melanogaster GN=Fur1 PE=2 SV=2"|e=0|from=1976|to=3844|  
frame=-1|Fragment\_2  
RTNLRT

>Locus\_6988\_Transcript\_2/6\_Confidence\_0.615\_Length\_3850|.|"sp|  
P30430|FUR1C\_DROME Furin-like protease 1, isoform 1-CRR  
OS=Drosophila melanogaster GN=Fur1 PE=2 SV=2"|e=0|from=1976|to=3844|  
frame=-1|Fragment\_3  
GIALNDQKWPQMWYLNRGSGGLDMNVIPAWKEGITGKGVVVTILDDGLEKNHPDLIRNYDP  
QASYDVNSHDEDPMTRYDMIDSNRHGTRCAGEVAATANNSLC

>Locus\_6988\_Transcript\_2/6\_Confidence\_0.615\_Length\_3850|.|"sp|  
P30430|FUR1C\_DROME Furin-like protease 1, isoform 1-CRR  
OS=Drosophila melanogaster GN=Fur1 PE=2 SV=2"|e=0|from=1976|to=3844|  
frame=-1|Fragment\_4

VRMLDGDVTDAVEARSLSLNPQHIDIYSASWGPDDDGKTVDPGELATRAFIQVTKGRS  
GKGSIFVWASNGGREHDNCNCDGYTNSIWTLSSATERGLVPWYSEMCSSTLATTYSS  
GAQNEKQVITDLHHACTIONSSHTGTSASAPLAAGICALALEANRDLTWRDMQHIVVRTAKP  
ANLKSDDWATNGVGRNVSHSFGYGLMDAAAMVKLARTWKTVPQRRCEVSAPHIDKLIPP  
KSKVILQLPVSLCQGVNFLEHVQAKISLQASRRGDIQIHLTSPGGTRVTLAARQNDASR  
SGFSNWPFSVHTWGESPOGLWHLEVHNEGRYMAKLTQWDLLEHGTQEPPEQESDVE

>Locus\_6988\_Transcript\_2/6\_Confidence\_0.615\_Length\_3850|.|"sp|  
P30430|FUR1C\_DROME Furin-like protease 1, isoform 1-CRR  
OS=Drosophila melanogaster GN=Fur1 PE=2 SV=2"|e=0|from=1976|to=3844|  
frame=-1|Fragment\_5  
SVQYSANGGSNYPDGLHNSLETDTASGQWRDLHHVREGHIDVQRTASDDVTSSACISYN  
DNHNCL

>Locus\_6988\_Transcript\_3/6\_Confidence\_0.615\_Length\_3850|.|"sp|  
P30430|FUR1C\_DROME Furin-like protease 1, isoform 1-CRR  
OS=Drosophila melanogaster GN=Fur1 PE=2 SV=2"|e=0|from=1976|to=3844|  
frame=-1|Fragment\_1  
ANLVARDHGFINLGEIFNDHYHFHRAVPKRSKRSCDHRHRRLQSDSRVHWARQQRVKSR  
QKRDLIALRP

>Locus\_6988\_Transcript\_3/6\_Confidence\_0.615\_Length\_3850|.|"sp|  
P30430|FUR1C\_DROME Furin-like protease 1, isoform 1-CRR  
OS=Drosophila melanogaster GN=Fur1 PE=2 SV=2"|e=0|from=1976|to=3844|  
frame=-1|Fragment\_2  
RTNLRT

>Locus\_6988\_Transcript\_3/6\_Confidence\_0.615\_Length\_3850|.|"sp|  
P30430|FUR1C\_DROME Furin-like protease 1, isoform 1-CRR  
OS=Drosophila melanogaster GN=Fur1 PE=2 SV=2"|e=0|from=1976|to=3844|  
frame=-1|Fragment\_3  
GIALNDQKWPQMWYLNRGSGGLDMNVIPAWKEGITGKGVVVTILDDGLEKNHPDLIRNYDP  
QASYDVNSHDEDPMTRYDMIDSNRHGTRCAGEVAATANNSLC

>Locus\_6988\_Transcript\_3/6\_Confidence\_0.615\_Length\_3850|.|"sp|  
P30430|FUR1C\_DROME Furin-like protease 1, isoform 1-CRR  
OS=Drosophila melanogaster GN=Fur1 PE=2 SV=2"|e=0|from=1976|to=3844|

frame=-1|Fragment\_4  
VRMLDGDVTD AVEARSLSLNPQHIDIYSASWGPDDD GKTVDGPGELATRAFI EGVTKGRS  
GKGSIFVWASNGGREHDNCNCDGYTNSIWTL SISSATERGLVPWYSEMCSSTLATTYSS  
GAQNEKQVITDDLHHA CTSSHTGT SASAPLAAGICALALEANRDLTWRDMQHIVVRTAKP  
ANLKSDDWATNGVGRNVSHSFGYGLMDAAAMV KLARTWKTVP EQRRCEVSAPHIDKLIPP  
KSKVILQLPVSLCQGVNFLEHVQAKISLQASRRGDIQIHLTSPGGTRVTL LAARQNDASR  
SGFSNWP FMSVHTWGES PQGLWHLEVHNEGRYMAKLTQWDL LFHGTQEPPESDVE  
>Locus\_6988\_Transcript\_3/6\_Confidence\_0.615\_Length\_3850|.|"sp|  
P30430|FUR1C\_DROME Furin-like protease 1, isoform 1-CRR  
OS=Drosophila melanogaster GN=Fur1 PE=2 SV=2"|e=0|from=1976|to=3844|  
frame=-1|Fragment\_5  
SVQYSANGGSNYPDGL EHN SLETDTASGQWRDLHHVREGHIDVQRTASDDVTSSACISYN  
DNHNCL  
>Locus\_6988\_Transcript\_6/6\_Confidence\_0.615\_Length\_3850|.|"sp|  
P30430|FUR1C\_DROME Furin-like protease 1, isoform 1-CRR  
OS=Drosophila melanogaster GN=Fur1 PE=2 SV=2"|e=0|from=1976|to=3844|  
frame=-1|Fragment\_1  
ANLVAR DHGFINLGEIFNDHYHFHRAVPKR SKRSCDHRHRRLQSDSRVHVARQQRVKSR  
QKRD LIALRP  
>Locus\_6988\_Transcript\_6/6\_Confidence\_0.615\_Length\_3850|.|"sp|  
P30430|FUR1C\_DROME Furin-like protease 1, isoform 1-CRR  
OS=Drosophila melanogaster GN=Fur1 PE=2 SV=2"|e=0|from=1976|to=3844|  
frame=-1|Fragment\_2  
RTNLRT  
>Locus\_6988\_Transcript\_6/6\_Confidence\_0.615\_Length\_3850|.|"sp|  
P30430|FUR1C\_DROME Furin-like protease 1, isoform 1-CRR  
OS=Drosophila melanogaster GN=Fur1 PE=2 SV=2"|e=0|from=1976|to=3844|  
frame=-1|Fragment\_3  
GIALNDQKWPQM WYLN RGSGLDMNVIPAWKEGITGKGVVVTILDDGLEKNHPDLIRNYDP  
QASYDVNSHDED PMPRYDMIDSNRHGTRCAGEVAATANNSLC  
>Locus\_6988\_Transcript\_6/6\_Confidence\_0.615\_Length\_3850|.|"sp|  
P30430|FUR1C\_DROME Furin-like protease 1, isoform 1-CRR  
OS=Drosophila melanogaster GN=Fur1 PE=2 SV=2"|e=0|from=1976|to=3844|  
frame=-1|Fragment\_4  
VRMLDGDVTD AVEARSLSLNPQHIDIYSASWGPDDD GKTVDGPGELATRAFI EGVTKGRS  
GKGSIFVWASNGGREHDNCNCDGYTNSIWTL SISSATERGLVPWYSEMCSSTLATTYSS  
GAQNEKQVITDDLHHA CTSSHTGT SASAPLAAGICALALEANRDLTWRDMQHIVVRTAKP  
ANLKSDDWATNGVGRNVSHSFGYGLMDAAAMV KLARTWKTVP EQRRCEVSAPHIDKLIPP  
KSKVILQLPVSLCQGVNFLEHVQAKISLQASRRGDIQIHLTSPGGTRVTL LAARQNDASR  
SGFSNWP FMSVHTWGES PQGLWHLEVHNEGRYMAKLTQWDL LFHGTQEPPESDVE  
>Locus\_6988\_Transcript\_6/6\_Confidence\_0.615\_Length\_3850|.|"sp|  
P30430|FUR1C\_DROME Furin-like protease 1, isoform 1-CRR  
OS=Drosophila melanogaster GN=Fur1 PE=2 SV=2"|e=0|from=1976|to=3844|  
frame=-1|Fragment\_5  
SVQYSANGGSNYPDGL EHN SLETDTASGQWRDLHHVREGHIDVQRTASDDVTSSACISYN  
DNHNCL  
>Locus\_6988\_Transcript\_5/6\_Confidence\_0.615\_Length\_3793|.|"sp|  
P30430|FUR1C\_DROME Furin-like protease 1, isoform 1-CRR  
OS=Drosophila melanogaster GN=Fur1 PE=2 SV=2"|e=0|from=1919|to=3787|  
frame=-1|Fragment\_1  
ANLVAR DHGFINLGEIFNDHYHFHRAVPKR SKRSCDHRHRRLQSDSRVHVARQQRVKSR  
QKRD LIALRP  
>Locus\_6988\_Transcript\_5/6\_Confidence\_0.615\_Length\_3793|.|"sp|  
P30430|FUR1C\_DROME Furin-like protease 1, isoform 1-CRR

OS=Drosophila melanogaster GN=Fur1 PE=2 SV=2"|e=0|from=1919|to=3787|  
frame=-1|Fragment\_2

RTNLRT

>Locus\_6988\_Transcript\_5/6\_Confidence\_0.615\_Length\_3793|.|"sp|

P30430|FUR1C\_DROME Furin-like protease 1, isoform 1-CRR

OS=Drosophila melanogaster GN=Fur1 PE=2 SV=2"|e=0|from=1919|to=3787|  
frame=-1|Fragment\_3

GIALNDQKWPQMWYLNREGSGLDMNVIPAWKEGITGKGVVVTILDDGLEKNHPDLIRNYDP

QASYDVNSHDEDPMPLYDMIDSNRHGTRCAGEVAATANNSLC

>Locus\_6988\_Transcript\_5/6\_Confidence\_0.615\_Length\_3793|.|"sp|

P30430|FUR1C\_DROME Furin-like protease 1, isoform 1-CRR

OS=Drosophila melanogaster GN=Fur1 PE=2 SV=2"|e=0|from=1919|to=3787|  
frame=-1|Fragment\_4

VRMLDGDVTDAREARSLSLNPQHIDIYSASWGPDDDGTVDGPGELATRAFIGVTKGRS

GKGSIFVWASNGGREHDNCNCDGYTNSIWTLISSATERGLVPWYSEMCSSTLATTYSS

GAQNEKQVITDHLHACTSSHTGTSASAPLAAGICALALEANRDLTWRDMQHIIVRTAKP

ANLKSDDWATNGVGRNVSHSFGYGLMDAAAMVKLARTWKTVPQRRCEVSAPHIDKLIPP

KSKVILQLPVSLCQGVNFLEHVQAKISLQASRRGDIQIHLTSPGGTRVTLAARQNDASR

SGFSNWPMSVHTWGESPOQLWHLEVHNEGRYMAKLTQWDLLEHGTQEPPEQESDVE

>Locus\_6988\_Transcript\_5/6\_Confidence\_0.615\_Length\_3793|.|"sp|

P30430|FUR1C\_DROME Furin-like protease 1, isoform 1-CRR

OS=Drosophila melanogaster GN=Fur1 PE=2 SV=2"|e=0|from=1919|to=3787|  
frame=-1|Fragment\_5

SVQYSANGGSNYPDGLEHNSLETDTASGQWRDLHHVREGHIDVQRTASDDVTSSACISYN

DNHNCL

>Locus\_6988\_Transcript\_4/6\_Confidence\_0.538\_Length\_2275|.|"sp|

P30430|FUR1C\_DROME Furin-like protease 1, isoform 1-CRR

OS=Drosophila melanogaster GN=Fur1 PE=2 SV=2"|e=0|from=56|to=2269|  
frame=-1|Fragment\_1

ANLVARDHGFINLGEIFNDHYHFHRAVPKRKRSCDHRHRRLQSDSRVHWARQQRVKSR

QKRDLIALRP

>Locus\_6988\_Transcript\_4/6\_Confidence\_0.538\_Length\_2275|.|"sp|

P30430|FUR1C\_DROME Furin-like protease 1, isoform 1-CRR

OS=Drosophila melanogaster GN=Fur1 PE=2 SV=2"|e=0|from=56|to=2269|  
frame=-1|Fragment\_2

RTNLRT

>Locus\_6988\_Transcript\_4/6\_Confidence\_0.538\_Length\_2275|.|"sp|

P30430|FUR1C\_DROME Furin-like protease 1, isoform 1-CRR

OS=Drosophila melanogaster GN=Fur1 PE=2 SV=2"|e=0|from=56|to=2269|  
frame=-1|Fragment\_3

GIALNDQKWPQMWYLNREGSGLDMNVIPAWKEGITGKGVVVTILDDGLEKNHPDLIRNYDP

QASYDVNSHDEDPMPLYDMIDSNRHGTRCAGEVAATANNSLC

>Locus\_6988\_Transcript\_4/6\_Confidence\_0.538\_Length\_2275|.|"sp|

P30430|FUR1C\_DROME Furin-like protease 1, isoform 1-CRR

OS=Drosophila melanogaster GN=Fur1 PE=2 SV=2"|e=0|from=56|to=2269|  
frame=-1|Fragment\_4

VRMLDGDVTDAREARSLSLNPQHIDIYSASWGPDDDGTVDGPGELATRAFIGVTKGRS

GKGSIFVWASNGGREHDNCNCDGYTNSIWTLISSATERGLVPWYSEMCSSTLATTYSS

GAQNEKQVITDHLHACTSSHTGTSASAPLAAGICALALEANRDLTWRDMQHIIVRTAKP

ANLKSDDWATNGVGRNVSHSFGYGLMDAAAMVKLARTWKTVPQRRCEVSAPHIDKLIPP

KSKVILQLPVSLCQGVNFLEHVQAKISLQASRRGDIQIHLTSPGGTRVTLAARQNDASR

SGFSNWPMSVHTWGESPOQLWHLEVHNEGRYMAKLTQWDLLEHGTQEPPEQESDVE

>Locus\_6988\_Transcript\_4/6\_Confidence\_0.538\_Length\_2275|.|"sp|

P30430|FUR1C\_DROME Furin-like protease 1, isoform 1-CRR

OS=Drosophila melanogaster GN=Fur1 PE=2 SV=2"|e=0|from=56|to=2269|  
frame=-1|Fragment\_5  
SVQYSANGGSNYPDGLHNSLETDTASGQWRDLHHVREGHIDVQRTASDDVTSSACISYN  
DNHNCLECMPDTYLFEHGHCYTNCPAKSFLSAK  
>Locus\_6988\_Transcript\_4/6\_Confidence\_0.538\_Length\_2275|.|"sp|  
P30430|FUR1C\_DROME Furin-like protease 1, isoform 1-CRR  
OS=Drosophila melanogaster GN=Fur1 PE=2 SV=2"|e=0|from=56|to=2269|  
frame=-1|Fragment\_6  
PTWLPATRNHNKKHLLLENLWSSLAARNG  
>Locus\_6988\_Transcript\_4/6\_Confidence\_0.538\_Length\_2275|.|"sp|  
P30430|FUR1C\_DROME Furin-like protease 1, isoform 1-CRR  
OS=Drosophila melanogaster GN=Fur1 PE=2 SV=2"|e=0|from=56|to=2269|  
frame=-1|Fragment\_7  
HRVQRQVEEINRNSDM  
>Locus\_6988\_Transcript\_4/6\_Confidence\_0.538\_Length\_2275|.|"sp|  
P30430|FUR1C\_DROME Furin-like protease 1, isoform 1-CRR  
OS=Drosophila melanogaster GN=Fur1 PE=2 SV=2"|e=0|from=56|to=2269|  
frame=-1|Fragment\_8  
MVCLHCHYSCLTCRGPNDHECSTCNEDAVLTNKTNNENFCYPLTI

>Locus\_4010\_Transcript\_1/3\_Confidence\_0.714\_Length\_4138|UNIGENE  
REPRESENTATIVE TRANSCRIPT|sp|P30432|FUR2\_DROME Furin-like protease 2  
OS=Drosophila melanogaster GN=Fur2 PE=2 SV=2|e=0|from=72|to=3968|  
frame=3|Fragment\_1  
IYGNEFAVHVPSGVEAADAIKVKHGFVNMGQIGSLKGYLFFQHNVHRKRSLSMSTEHHT  
LNSEPEVYVWQQHEKVRKRDRDYGTIYNGQFSPLDTASELDALLLGG  
>Locus\_4010\_Transcript\_1/3\_Confidence\_0.714\_Length\_4138|UNIGENE  
REPRESENTATIVE TRANSCRIPT|sp|P30432|FUR2\_DROME Furin-like protease 2  
OS=Drosophila melanogaster GN=Fur2 PE=2 SV=2|e=0|from=72|to=3968|  
frame=3|Fragment\_2  
VAPSASRL  
>Locus\_4010\_Transcript\_1/3\_Confidence\_0.714\_Length\_4138|UNIGENE  
REPRESENTATIVE TRANSCRIPT|sp|P30432|FUR2\_DROME Furin-like protease 2  
OS=Drosophila melanogaster GN=Fur2 PE=2 SV=2|e=0|from=72|to=3968|  
frame=3|Fragment\_3  
HTARYRALGVGTQSIFPDPLFKEEWYLNKGAKDGLDMNVSPAQQKGYTGKGVVVSILDDG  
IQTNHPDLALNYDPAAST  
>Locus\_4010\_Transcript\_1/3\_Confidence\_0.714\_Length\_4138|UNIGENE  
REPRESENTATIVE TRANSCRIPT|sp|P30432|FUR2\_DROME Furin-like protease 2  
OS=Drosophila melanogaster GN=Fur2 PE=2 SV=2|e=0|from=72|to=3968|  
frame=3|Fragment\_4  
KHGTRCAGEVAAVAYNNYCGIGVAYNASIGGVRMLDGVVNDAVEARALGLNPDHIDVYSA  
SWGPEDDGKTVDGPGPLARRAFIYGVTSGRKKGKGSIFVWASGNNGRHTDSCNCDGYTNSI  
FTLSISSATQGGYKPWYLEECSSTLASTYSSGTPGHDKSVATVMDARLRPDHICTVEHT  
GTSASAPLAAGICALALEANPALTRWDMQYLVLVTSRSAPLEKEAGWILNGVKKVSHKF  
GYGLMDAGAMVSLAEQWTTVPPQHICKSQEIAEERLIEPTYGNTLVAHMDVTGCSGTLNE  
VRFLEHVQCKITLRFPRGNLKILLTSPMGTSTLLFERPRDVSNSNFDDWPFLSVHFWG  
EKADGRWTLQVINAGNRRVNQAGILKKWQLIFYGTNTNPIR  
>Locus\_4010\_Transcript\_1/3\_Confidence\_0.714\_Length\_4138|UNIGENE  
REPRESENTATIVE TRANSCRIPT|sp|P30432|FUR2\_DROME Furin-like protease 2  
OS=Drosophila melanogaster GN=Fur2 PE=2 SV=2|e=0|from=72|to=3968|  
frame=3|Fragment\_5  
LRSPNPS  
>Locus\_4010\_Transcript\_1/3\_Confidence\_0.714\_Length\_4138|UNIGENE

REPRESENTATIVE TRANSCRIPT|sp|P30432|FUR2\_DROME Furin-like protease 2  
OS=Drosophila melanogaster GN=Fur2 PE=2 SV=2|e=0|from=72|to=3968|  
frame=3|Fragment\_6  
FQFPGQDALRRVVPQPQYFTDFNT  
>Locus\_4010\_Transcript\_1/3\_Confidence\_0.714\_Length\_4138|UNIGENE  
REPRESENTATIVE TRANSCRIPT|sp|P30432|FUR2\_DROME Furin-like protease 2  
OS=Drosophila melanogaster GN=Fur2 PE=2 SV=2|e=0|from=72|to=3968|  
frame=3|Fragment\_7  
GTYRNYPDLF  
>Locus\_4010\_Transcript\_1/3\_Confidence\_0.714\_Length\_4138|UNIGENE  
REPRESENTATIVE TRANSCRIPT|sp|P30432|FUR2\_DROME Furin-like protease 2  
OS=Drosophila melanogaster GN=Fur2 PE=2 SV=2|e=0|from=72|to=3968|  
frame=3|Fragment\_8  
GAGSDPEVAIVSPD  
>Locus\_4010\_Transcript\_1/3\_Confidence\_0.714\_Length\_4138|UNIGENE  
REPRESENTATIVE TRANSCRIPT|sp|P30432|FUR2\_DROME Furin-like protease 2  
OS=Drosophila melanogaster GN=Fur2 PE=2 SV=2|e=0|from=72|to=3968|  
frame=3|Fragment\_9  
DGMLAQASATNVVVNKT  
>Locus\_4010\_Transcript\_1/3\_Confidence\_0.714\_Length\_4138|UNIGENE  
REPRESENTATIVE TRANSCRIPT|sp|P30432|FUR2\_DROME Furin-like protease 2  
OS=Drosophila melanogaster GN=Fur2 PE=2 SV=2|e=0|from=72|to=3968|  
frame=3|Fragment\_10  
ETFHNNCDEQCDEQKGCYGPQPGQCIACKHYKLDQTCVSKCPPRSFPNQQGICWPCHASC  
ETCAGAGMDSCLTCAPHLRVLDLAVCLQQCPEGYFENTEQGTVCVPCGPTCGSCQDRPDN  
CTSCDHHLVMIYENKCYAACPDYETEDYNCAQCHPSCGTCTGPSETQCVTCKPGLLHHE  
GACLSSCPANFRADKKRRECVPCPSGCTSCCESSGMCTDCAEGWDADKKGKCPNGAEKCE  
QGEYYA  
>Locus\_4010\_Transcript\_1/3\_Confidence\_0.714\_Length\_4138|UNIGENE  
REPRESENTATIVE TRANSCRIPT|sp|P30432|FUR2\_DROME Furin-like protease 2  
OS=Drosophila melanogaster GN=Fur2 PE=2 SV=2|e=0|from=72|to=3968|  
frame=3|Fragment\_11  
DGNCHPCHSTCESCFGPSKSDCLSCEQSLRLQNSNCVGECTDGHFPEGGG  
>Locus\_4010\_Transcript\_1/3\_Confidence\_0.714\_Length\_4138|UNIGENE  
REPRESENTATIVE TRANSCRIPT|sp|P30432|FUR2\_DROME Furin-like protease 2  
OS=Drosophila melanogaster GN=Fur2 PE=2 SV=2|e=0|from=72|to=3968|  
frame=3|Fragment\_12  
CSPCLHTCTQCVSRQNTACAPGLQLQTGECRATCADGYYNDRGGCSRCYISCQTCSGPR  
RDQCVRCPTGWQIAAGECRPECPAGFYRGAYNCQRCHHSCRNCKDEGPLSCTSCPPGHML  
DGGLCMECLGSQYYDPPTQLCKTCDSSCRTCNPGPKFSCVCSCTSPLHLDKLNNQCVPC  
>Locus\_4010\_Transcript\_1/3\_Confidence\_0.714\_Length\_4138|UNIGENE  
REPRESENTATIVE TRANSCRIPT|sp|P30432|FUR2\_DROME Furin-like protease 2  
OS=Drosophila melanogaster GN=Fur2 PE=2 SV=2|e=0|from=72|to=3968|  
frame=3|Fragment\_13  
ALVDQT  
>Locus\_4010\_Transcript\_1/3\_Confidence\_0.714\_Length\_4138|UNIGENE  
REPRESENTATIVE TRANSCRIPT|sp|P30432|FUR2\_DROME Furin-like protease 2  
OS=Drosophila melanogaster GN=Fur2 PE=2 SV=2|e=0|from=72|to=3968|  
frame=3|Fragment\_14  
CCHCDPNTGSKNSSPAGKRRIALGLIETEQMIQKSKDI  
>Locus\_4010\_Transcript\_1/3\_Confidence\_0.714\_Length\_4138|UNIGENE  
REPRESENTATIVE TRANSCRIPT|sp|P30432|FUR2\_DROME Furin-like protease 2  
OS=Drosophila melanogaster GN=Fur2 PE=2 SV=2|e=0|from=72|to=3968|  
frame=3|Fragment\_15

NQSVSSYI

>Locus\_4010\_Transcript\_1/3\_Confidence\_0.714\_Length\_4138|UNIGENE  
REPRESENTATIVE TRANSCRIPT|sp|P30432|FUR2\_DROME Furin-like protease 2  
OS=Drosophila melanogaster GN=Fur2 PE=2 SV=2|e=0|from=72|to=3968|  
frame=3|Fragment\_16

LNGLPSLTVAIVMILIFVTIFATFQR

>Locus\_4010\_Transcript\_1/3\_Confidence\_0.714\_Length\_4138|UNIGENE  
REPRESENTATIVE TRANSCRIPT|sp|P30432|FUR2\_DROME Furin-like protease 2  
OS=Drosophila melanogaster GN=Fur2 PE=2 SV=2|e=0|from=72|to=3968|  
frame=3|Fragment\_17

MHTNRVSYSKLPTINTSS

>Locus\_4010\_Transcript\_1/3\_Confidence\_0.714\_Length\_4138|UNIGENE  
REPRESENTATIVE TRANSCRIPT|sp|P30432|FUR2\_DROME Furin-like protease 2  
OS=Drosophila melanogaster GN=Fur2 PE=2 SV=2|e=0|from=72|to=3968|  
frame=3|Fragment\_18

HMIDEISECDKLDGDYLVSDTDEV

>Locus\_4010\_Transcript\_2/3\_Confidence\_0.714\_Length\_4138|. |sp|P30432|  
FUR2\_DROME Furin-like protease 2 OS=Drosophila melanogaster GN=Fur2  
PE=2 SV=2|e=0|from=72|to=3968|frame=3|Fragment\_1

IYGNFAVHVPSGVEAADAIKVGKGFVNMGIKSLKGYLFFQHNVKRSLSMSTEHET

LNSEPEVYVWQQHEKVRKRKYGTIYNGQFSPDLTASELDALLGG

>Locus\_4010\_Transcript\_2/3\_Confidence\_0.714\_Length\_4138|. |sp|P30432|  
FUR2\_DROME Furin-like protease 2 OS=Drosophila melanogaster GN=Fur2  
PE=2 SV=2|e=0|from=72|to=3968|frame=3|Fragment\_2

VAPSASRL

>Locus\_4010\_Transcript\_2/3\_Confidence\_0.714\_Length\_4138|. |sp|P30432|  
FUR2\_DROME Furin-like protease 2 OS=Drosophila melanogaster GN=Fur2  
PE=2 SV=2|e=0|from=72|to=3968|frame=3|Fragment\_3

HTARYRALGVGTQSIFPDPLFKEEWYLNNGGAKDGLDMNVSPAQQGYTGKGVVVSILDDG

IQTNHPDLALNYDPAAST

>Locus\_4010\_Transcript\_2/3\_Confidence\_0.714\_Length\_4138|. |sp|P30432|  
FUR2\_DROME Furin-like protease 2 OS=Drosophila melanogaster GN=Fur2  
PE=2 SV=2|e=0|from=72|to=3968|frame=3|Fragment\_4

KHGTRCAGEVAAYANNYCGIGVAYNASIGGVRMLDGVVNDAVEARALGLNPDHIDVYSA

SWGPEDDGKTVDGPGPLARRAFIYGVTSGRKKGKGSIFVWASGNGGRHTDSCNCDGYTNSI

FTLSISSATQGGYKPWYLEECSSTLASTYSSGTPGHDKSVATVDMARLRPDHICTVEHT

GTSASAPLAAGICALALEANPALTWRDMQYLVLTSSAPLEKEAGWILNGVKKVSHKF

GYGLMDAGAMVSLAEQWTTVPPQHICKSQEIAEERLIEPTYGNTLVHMDVTGCSGTLNE

VRFLEHVQCKITLRFPRGNLKILLTSPMGTSTLLFERPRDVVSSNFDDWPFLSVHFWG

EKADGRWTLQVINAGNRRVNQAGILKKWQLIFYGTNTNPIR

>Locus\_4010\_Transcript\_2/3\_Confidence\_0.714\_Length\_4138|. |sp|P30432|  
FUR2\_DROME Furin-like protease 2 OS=Drosophila melanogaster GN=Fur2  
PE=2 SV=2|e=0|from=72|to=3968|frame=3|Fragment\_5

LRSPNPS

>Locus\_4010\_Transcript\_2/3\_Confidence\_0.714\_Length\_4138|. |sp|P30432|  
FUR2\_DROME Furin-like protease 2 OS=Drosophila melanogaster GN=Fur2  
PE=2 SV=2|e=0|from=72|to=3968|frame=3|Fragment\_6

FQFPGQDALRRVPPQPPQYFTDFNT

>Locus\_4010\_Transcript\_2/3\_Confidence\_0.714\_Length\_4138|. |sp|P30432|  
FUR2\_DROME Furin-like protease 2 OS=Drosophila melanogaster GN=Fur2  
PE=2 SV=2|e=0|from=72|to=3968|frame=3|Fragment\_7

GTYRNYPDLF

>Locus\_4010\_Transcript\_2/3\_Confidence\_0.714\_Length\_4138|. |sp|P30432|  
FUR2\_DROME Furin-like protease 2 OS=Drosophila melanogaster GN=Fur2

PE=2 SV=2|e=0|from=72|to=3968|frame=3|Fragment\_8  
GAGSDPEVAIVSPD  
>Locus\_4010\_Transcript\_2/3\_Confidence\_0.714\_Length\_4138|. |sp|P30432|  
FUR2\_DROME Furin-like protease 2 OS=Drosophila melanogaster GN=Fur2  
PE=2 SV=2|e=0|from=72|to=3968|frame=3|Fragment\_9  
DGMLAQASATNVVVNKT  
>Locus\_4010\_Transcript\_2/3\_Confidence\_0.714\_Length\_4138|. |sp|P30432|  
FUR2\_DROME Furin-like protease 2 OS=Drosophila melanogaster GN=Fur2  
PE=2 SV=2|e=0|from=72|to=3968|frame=3|Fragment\_10  
ETFHNNCDEQCDEQKGCYGPQGIACKHYKLDQTCVSKPPRSFPNQQGICWPCHASC  
ETCAGAGMDSCLTCAPAHLRVLDLAVCLQQCEGYFENTEQGTVCVPCGPTCGSCQDRPDN  
CTSCDHHLVMIYENKCYAACPDYETEDYNCAQCHPSCGTCTGPSETQCVTCKPGLLHHE  
GACLSSCPANFRADKKRRECVPCPSGCTSCCESSGMCTDCAEGWDADKKGKCPNGAEKCE  
QGEYYA  
>Locus\_4010\_Transcript\_2/3\_Confidence\_0.714\_Length\_4138|. |sp|P30432|  
FUR2\_DROME Furin-like protease 2 OS=Drosophila melanogaster GN=Fur2  
PE=2 SV=2|e=0|from=72|to=3968|frame=3|Fragment\_11  
DGNCHPCHSTCESFCGSPKSDCLSCQSLRLQNSNCVGECTDGHFPEGGG  
>Locus\_4010\_Transcript\_2/3\_Confidence\_0.714\_Length\_4138|. |sp|P30432|  
FUR2\_DROME Furin-like protease 2 OS=Drosophila melanogaster GN=Fur2  
PE=2 SV=2|e=0|from=72|to=3968|frame=3|Fragment\_12  
CSPCLHTCTQCVSRQNTACAPGLQLQTGECRATCADGYYNDRGGCSRCYISCQTCGPR  
RDQCVRCPTGWQIAAGECRPECPAGFYRGAYNCQRCHHSCRNCKDEGPLSCTSCPPGHML  
DGGLCMECLGSQYYDPPTQLCKTCDSSCRTCNPGKFCVSVSCTSPHLHLKLNQCVPCC  
>Locus\_4010\_Transcript\_2/3\_Confidence\_0.714\_Length\_4138|. |sp|P30432|  
FUR2\_DROME Furin-like protease 2 OS=Drosophila melanogaster GN=Fur2  
PE=2 SV=2|e=0|from=72|to=3968|frame=3|Fragment\_13  
ALVDQT  
>Locus\_4010\_Transcript\_2/3\_Confidence\_0.714\_Length\_4138|. |sp|P30432|  
FUR2\_DROME Furin-like protease 2 OS=Drosophila melanogaster GN=Fur2  
PE=2 SV=2|e=0|from=72|to=3968|frame=3|Fragment\_14  
CCHCDPNTGSKNSSPAGKRRIALGLIETEQMIQKSKDI  
>Locus\_4010\_Transcript\_2/3\_Confidence\_0.714\_Length\_4138|. |sp|P30432|  
FUR2\_DROME Furin-like protease 2 OS=Drosophila melanogaster GN=Fur2  
PE=2 SV=2|e=0|from=72|to=3968|frame=3|Fragment\_15  
NQQSVSSYI  
>Locus\_4010\_Transcript\_2/3\_Confidence\_0.714\_Length\_4138|. |sp|P30432|  
FUR2\_DROME Furin-like protease 2 OS=Drosophila melanogaster GN=Fur2  
PE=2 SV=2|e=0|from=72|to=3968|frame=3|Fragment\_16  
LNLPSLTVAAVIVMILIFVTIFATFQR  
>Locus\_4010\_Transcript\_2/3\_Confidence\_0.714\_Length\_4138|. |sp|P30432|  
FUR2\_DROME Furin-like protease 2 OS=Drosophila melanogaster GN=Fur2  
PE=2 SV=2|e=0|from=72|to=3968|frame=3|Fragment\_17  
MHTNRVSYSKLPTINTSS  
>Locus\_4010\_Transcript\_2/3\_Confidence\_0.714\_Length\_4138|. |sp|P30432|  
FUR2\_DROME Furin-like protease 2 OS=Drosophila melanogaster GN=Fur2  
PE=2 SV=2|e=0|from=72|to=3968|frame=3|Fragment\_18  
HMIDEISECDKLDGDYLVSDTDEVD  
>Locus\_4010\_Transcript\_3/3\_Confidence\_0.714\_Length\_4138|. |sp|P30432|  
FUR2\_DROME Furin-like protease 2 OS=Drosophila melanogaster GN=Fur2  
PE=2 SV=2|e=0|from=72|to=3968|frame=3|Fragment\_1  
IYGNEFAVHVPSGVEAADAIKVGKGFVNMGQIGSLKGYLLFQHNHVRKRSLSMSTEHET  
LNSEPEVYVWQQQHEKVRKRDRDYGTIYNGQFSPLDTASELDALLLGG  
>Locus\_4010\_Transcript\_3/3\_Confidence\_0.714\_Length\_4138|. |sp|P30432|

FUR2\_DROME Furin-like protease 2 OS=Drosophila melanogaster GN=Fur2  
PE=2 SV=2|e=0|from=72|to=3968|frame=3|Fragment\_2

VAPSASRL

>Locus\_4010\_Transcript\_3/3\_Confidence\_0.714\_Length\_4138|. |sp|P30432|

FUR2\_DROME Furin-like protease 2 OS=Drosophila melanogaster GN=Fur2  
PE=2 SV=2|e=0|from=72|to=3968|frame=3|Fragment\_3

HTARYRALGVGTQSIFPDPLFKEEWYLNKGAKDGLDMNVSPAQQKGYTGKGVVVSILDDG  
IQTNHPDLALNYDPAAST

>Locus\_4010\_Transcript\_3/3\_Confidence\_0.714\_Length\_4138|. |sp|P30432|

FUR2\_DROME Furin-like protease 2 OS=Drosophila melanogaster GN=Fur2  
PE=2 SV=2|e=0|from=72|to=3968|frame=3|Fragment\_4

KHGTRCAGEVA AVAYNNYCGIGVAYNASIGGVRMLDGVVNDAVEARALGLNPDHIDVYSA  
SWGPEDDGKTVDGPGPLARRAFIYGVTSGRKGKGSIFVWASGNNGRHTDSCNCDGYTNSI  
FTLSSISSATQGGYKPYLEECSSLASTYSSGTPGHDKSVATVMDARLRDPDHICTVEHT  
GTSASAPLAAGICALALEANPALTWRDMQYLVLTSRSAPLEKEAGWILNGVKKVSHKF  
GYGLMDAGAMVSLAEQWTTVPPQHICKSQEIAEERLIEPTYGNTLVAHMDVTGCSGTLNE  
VRFLEHVQCKITLRFPPRGNLKILLTSPMGTSTLLFERPRDVVSSNFDDWPFLSVHFWG  
EKADGRWTLQVINAGNRRVNQAGILKKWQLIFYGTNTNPIR

>Locus\_4010\_Transcript\_3/3\_Confidence\_0.714\_Length\_4138|. |sp|P30432|

FUR2\_DROME Furin-like protease 2 OS=Drosophila melanogaster GN=Fur2  
PE=2 SV=2|e=0|from=72|to=3968|frame=3|Fragment\_5

LRSPNPS

>Locus\_4010\_Transcript\_3/3\_Confidence\_0.714\_Length\_4138|. |sp|P30432|

FUR2\_DROME Furin-like protease 2 OS=Drosophila melanogaster GN=Fur2  
PE=2 SV=2|e=0|from=72|to=3968|frame=3|Fragment\_6

FQFPGQDALRRVVPQPPQYFTDFNT

>Locus\_4010\_Transcript\_3/3\_Confidence\_0.714\_Length\_4138|. |sp|P30432|

FUR2\_DROME Furin-like protease 2 OS=Drosophila melanogaster GN=Fur2  
PE=2 SV=2|e=0|from=72|to=3968|frame=3|Fragment\_7

GTYRNYPDLF

>Locus\_4010\_Transcript\_3/3\_Confidence\_0.714\_Length\_4138|. |sp|P30432|

FUR2\_DROME Furin-like protease 2 OS=Drosophila melanogaster GN=Fur2  
PE=2 SV=2|e=0|from=72|to=3968|frame=3|Fragment\_8

GAGSDPEVAIVSPD

>Locus\_4010\_Transcript\_3/3\_Confidence\_0.714\_Length\_4138|. |sp|P30432|

FUR2\_DROME Furin-like protease 2 OS=Drosophila melanogaster GN=Fur2  
PE=2 SV=2|e=0|from=72|to=3968|frame=3|Fragment\_9

DGMLAQASATNVVVNKT

>Locus\_4010\_Transcript\_3/3\_Confidence\_0.714\_Length\_4138|. |sp|P30432|

FUR2\_DROME Furin-like protease 2 OS=Drosophila melanogaster GN=Fur2  
PE=2 SV=2|e=0|from=72|to=3968|frame=3|Fragment\_10

ETFHNNCDEQCDEQKGCYGPQPGQCIACKHYKLDQTCVSKCPPRSFPNQGGICWPCHASC  
ETCAGAGMDSCLTCAPAHLRVLDLAVCLQQCEGYFENTEQGTVCVPCGPTCGSCQDRPDN  
CTSCDHHLVMYENKCYAAPQDTYETEDYNCAQCHPSCGTCTGPSETQCVTCKPGLLHHE  
GACLSSCPANFRADKKRRECVPCPSGCTSCCESSGMCTDCAEGWDADKKGKCPNGAEKCE  
QGEYYA

>Locus\_4010\_Transcript\_3/3\_Confidence\_0.714\_Length\_4138|. |sp|P30432|

FUR2\_DROME Furin-like protease 2 OS=Drosophila melanogaster GN=Fur2  
PE=2 SV=2|e=0|from=72|to=3968|frame=3|Fragment\_11

DGNCHPCHSTCESFCGSPKSDCLSCEQSLRLQNSNCVGECTDGHFPEGGG

>Locus\_4010\_Transcript\_3/3\_Confidence\_0.714\_Length\_4138|. |sp|P30432|

FUR2\_DROME Furin-like protease 2 OS=Drosophila melanogaster GN=Fur2  
PE=2 SV=2|e=0|from=72|to=3968|frame=3|Fragment\_12

CSPCLHTCTQCVSRQNTACAPGLQLQTGECRATCADGYNDRGGCSRCYISCQTCGPR

RDQCVRCPTGWQIAAGECRPECPAGFYRGAYNCQRCHHSCRNCKDEGPLSCTSCPPGHML  
DGGLCMECLGSQYYDPPTQLCKTCDSSCRTCNGPGKFCVSVSCTSPHLHDKLNNQCVPC  
>Locus\_4010\_Transcript\_3/3\_Confidence\_0.714\_Length\_4138|. |sp|P30432|  
FUR2\_DROME Furin-like protease 2 OS=Drosophila melanogaster GN=Fur2  
PE=2 SV=2|e=0|from=72|to=3968|frame=3|Fragment\_13  
ALVDQT  
>Locus\_4010\_Transcript\_3/3\_Confidence\_0.714\_Length\_4138|. |sp|P30432|  
FUR2\_DROME Furin-like protease 2 OS=Drosophila melanogaster GN=Fur2  
PE=2 SV=2|e=0|from=72|to=3968|frame=3|Fragment\_14  
CCHCDPNTGSKNSSPAGKRRRIALGLIETEQMIQSKDI  
>Locus\_4010\_Transcript\_3/3\_Confidence\_0.714\_Length\_4138|. |sp|P30432|  
FUR2\_DROME Furin-like protease 2 OS=Drosophila melanogaster GN=Fur2  
PE=2 SV=2|e=0|from=72|to=3968|frame=3|Fragment\_15  
NQSVSSYI  
>Locus\_4010\_Transcript\_3/3\_Confidence\_0.714\_Length\_4138|. |sp|P30432|  
FUR2\_DROME Furin-like protease 2 OS=Drosophila melanogaster GN=Fur2  
PE=2 SV=2|e=0|from=72|to=3968|frame=3|Fragment\_16  
LNLPLSLTVAIVMILIFVTIFATFQR  
>Locus\_4010\_Transcript\_3/3\_Confidence\_0.714\_Length\_4138|. |sp|P30432|  
FUR2\_DROME Furin-like protease 2 OS=Drosophila melanogaster GN=Fur2  
PE=2 SV=2|e=0|from=72|to=3968|frame=3|Fragment\_17  
MHTNRVSYSKLPTINTSS  
>Locus\_4010\_Transcript\_3/3\_Confidence\_0.714\_Length\_4138|. |sp|P30432|  
FUR2\_DROME Furin-like protease 2 OS=Drosophila melanogaster GN=Fur2  
PE=2 SV=2|e=0|from=72|to=3968|frame=3|Fragment\_18  
HMIDEISECDKLDGDYLVSDTDEVD  
>Locus\_23471\_Transcript\_1/1\_Confidence\_1.000\_Length\_326|UNIGENE  
REPRESENTATIVE TRANSCRIPT|sp|P30974|TLR1\_DROME Tachykinin-like  
peptides receptor 86C OS=Drosophila melanogaster GN=Takr86C PE=2  
SV=2|e=6.05896E-41|from=7|to=321|frame=1|Fragment\_1  
WSSAFGFMLFIAVGGNAIVMWIVIAHRMRTVTNYFLVNLADLLMSVLNCLFNFIYML  
KSDWIFGDWYCTINNFIAVNTVAASIFTLTGISFDRYMAIVRPLE  
  
>Locus\_8761\_Transcript\_1/5\_Confidence\_0.308\_Length\_1739|UNIGENE  
REPRESENTATIVE TRANSCRIPT|sp|P32870|CYA1\_DROME Ca(2+)/calmodulin-  
responsive adenylate cyclase OS=Drosophila melanogaster GN=rut PE=1  
SV=2|e=3.71316E-13|from=459|to=740|frame=-1|Fragment\_1  
ESNGYTTDEQGLNVSLLEAGLTDAEGALSDVNSIYHHPDHENG  
>Locus\_8761\_Transcript\_1/5\_Confidence\_0.308\_Length\_1739|UNIGENE  
REPRESENTATIVE TRANSCRIPT|sp|P32870|CYA1\_DROME Ca(2+)/calmodulin-  
responsive adenylate cyclase OS=Drosophila melanogaster GN=rut PE=1  
SV=2|e=3.71316E-13|from=459|to=740|frame=-1|Fragment\_2  
SGMY  
>Locus\_8761\_Transcript\_1/5\_Confidence\_0.308\_Length\_1739|UNIGENE  
REPRESENTATIVE TRANSCRIPT|sp|P32870|CYA1\_DROME Ca(2+)/calmodulin-  
responsive adenylate cyclase OS=Drosophila melanogaster GN=rut PE=1  
SV=2|e=3.71316E-13|from=459|to=740|frame=-1|Fragment\_3  
CDSEGVDGWPGLALLDIRSVSESITKKFG  
  
>Locus\_19463\_Transcript\_1/1\_Confidence\_1.000\_Length\_349|UNIGENE  
REPRESENTATIVE TRANSCRIPT|sp|P33085-4|SHAKB\_DROME Isoform D of  
Innexin shaking-B OS=Drosophila melanogaster GN=shakB|e=1.50702E-36|  
from=2|to=298|frame=2|Fragment\_1  
FW

>Locus\_19463\_Transcript\_1/1\_Confidence\_1.000\_Length\_349|UNIGENE  
REPRESENTATIVE TRANSCRIPT|sp|P33085-4|SHAKB\_DROME Isoform D of  
Innexin shaking-B OS=Drosophila melanogaster GN=shakB|e=1.50702E-36|  
from=2|to=298|frame=2|Fragment\_2  
YRVVIIIFSPRMRVYLLRMRFLIKRDAVEVIVRRSKMGDWFLLYMLGENVDSVIFRDVMQ  
ELAIRLGQDQHHVPGVKGEIQEA

>Locus\_27253\_Transcript\_1/1\_Confidence\_1.000\_Length\_387|UNIGENE  
REPRESENTATIVE TRANSCRIPT|sp|P33450|FAT\_DROME Cadherin-related tumor  
suppressor OS=Drosophila melanogaster GN=ft PE=1 SV=3|e=1.22924E-38|  
from=2|to=385|frame=2|Fragment\_1  
WGSDFVSLNPVTGLLLTAGKLDYEEIQHYVLVVQAQDAGSPALTSTAMLYINVIDVNDNA  
PAFEPRTYTKRIPENIPKGSEVIKLIATDKDSGANSIMKFSTINGDDTGDFSVDSNGIIR  
TQRVLDRE

>Locus\_27253\_Transcript\_1/1\_Confidence\_1.000\_Length\_387|. |sp|P33450|  
FAT\_DROME Cadherin-related tumor suppressor OS=Drosophila  
melanogaster GN=ft PE=1 SV=3|e=2.57503E-20|from=17|to=385|frame=2|  
Fragment\_1

FSLNPVTGLLLTAGKLDYEEIQHYVLVVQAQDAGSPALTSTAMLYINVIDVNDNAPAFEP  
RTYTKRIPENIPKGSEVIKLIATDKDSGANSIMKFSTINGDDTGDFSV

>Locus\_27253\_Transcript\_1/1\_Confidence\_1.000\_Length\_387|. |sp|P33450|  
FAT\_DROME Cadherin-related tumor suppressor OS=Drosophila  
melanogaster GN=ft PE=1 SV=3|e=2.57503E-20|from=17|to=385|frame=2|  
Fragment\_2

DSNGIIRTQRVLDRE

>Locus\_27253\_Transcript\_1/1\_Confidence\_1.000\_Length\_387|. |sp|P33450|  
FAT\_DROME Cadherin-related tumor suppressor OS=Drosophila  
melanogaster GN=ft PE=1 SV=3|e=3.36309E-20|from=8|to=385|frame=2|  
Fragment\_1

SDVFSLNPVTGLLLTAGKLDYEEIQHYVLVVQAQDAGSPALTSTAMLYINVIDVNDNAPA  
FEPRTYTKRIPENIPKGSEVIKLIATDKDSGANSIMKFSTINGDDTGDFSVDS

>Locus\_27253\_Transcript\_1/1\_Confidence\_1.000\_Length\_387|. |sp|P33450|  
FAT\_DROME Cadherin-related tumor suppressor OS=Drosophila  
melanogaster GN=ft PE=1 SV=3|e=3.36309E-20|from=8|to=385|frame=2|  
Fragment\_2

NGIIRTQRVLDRE

>Locus\_27253\_Transcript\_1/1\_Confidence\_1.000\_Length\_387|. |sp|P33450|  
FAT\_DROME Cadherin-related tumor suppressor OS=Drosophila  
melanogaster GN=ft PE=1 SV=3|e=4.85629E-19|from=38|to=385|frame=2|  
Fragment\_1

GLLLTAGKLDYEEIQHYVLVVQAQDAGSPALTSTAMLYINVIDVNDNAPAFEPRTYTKRI  
PENIPKGSEVIKLIATDKDSGANSIMKFSTINGDDTGDFSVDS

>Locus\_27253\_Transcript\_1/1\_Confidence\_1.000\_Length\_387|. |sp|P33450|  
FAT\_DROME Cadherin-related tumor suppressor OS=Drosophila  
melanogaster GN=ft PE=1 SV=3|e=4.85629E-19|from=38|to=385|frame=2|  
Fragment\_2

NGIIRTQRVLDRE

>Locus\_27253\_Transcript\_1/1\_Confidence\_1.000\_Length\_387|. |sp|P33450|  
FAT\_DROME Cadherin-related tumor suppressor OS=Drosophila  
melanogaster GN=ft PE=1 SV=3|e=1.19615E-17|from=41|to=385|frame=2|  
Fragment\_1

LLTAGKLDYEEIQHYVLVVQAQDAGSPALTSTAMLYINVIDVNDNAPAFEPRTYTKRIP  
ENIPKGSEVIKLIATDKDSGANSIMKFSTINGDDTGDFSVDS

>Locus\_27253\_Transcript\_1/1\_Confidence\_1.000\_Length\_387|. |sp|P33450|

FAT\_DROME Cadherin-related tumor suppressor OS=Drosophila  
melanogaster GN=ft PE=1 SV=3|e=1.19615E-17|from=41|to=385|frame=2|  
Fragment\_2  
NGIIRTQVLDRE  
>Locus\_27253\_Transcript\_1/1\_Confidence\_1.000\_Length\_387|. |sp|P33450|  
FAT\_DROME Cadherin-related tumor suppressor OS=Drosophila  
melanogaster GN=ft PE=1 SV=3|e=6.56348E-16|from=11|to=385|frame=2|  
Fragment\_1  
DVFSLNPVTGLLTLAGKLDYEEIQHYVLVVQAQDAGSPALTSTAMLYINVIDVNDNAPAF  
EPRTYTKRIPENIPKGSEVIKLIATDKDSGAN SIMKFSTINGD  
>Locus\_27253\_Transcript\_1/1\_Confidence\_1.000\_Length\_387|. |sp|P33450|  
FAT\_DROME Cadherin-related tumor suppressor OS=Drosophila  
melanogaster GN=ft PE=1 SV=3|e=6.56348E-16|from=11|to=385|frame=2|  
Fragment\_2  
DTGDFSVD  
>Locus\_27253\_Transcript\_1/1\_Confidence\_1.000\_Length\_387|. |sp|P33450|  
FAT\_DROME Cadherin-related tumor suppressor OS=Drosophila  
melanogaster GN=ft PE=1 SV=3|e=6.56348E-16|from=11|to=385|frame=2|  
Fragment\_3  
NGIIRTQVLDRE  
>Locus\_27253\_Transcript\_1/1\_Confidence\_1.000\_Length\_387|. |sp|P33450|  
FAT\_DROME Cadherin-related tumor suppressor OS=Drosophila  
melanogaster GN=ft PE=1 SV=3|e=1.46219E-15|from=17|to=385|frame=2|  
Fragment\_1  
FSLNPVTGLLTLAGKLDYEEIQHYVLVVQAQDAGSPALTSTAMLYINVIDVNDNAPAFEP  
RTYTKRIPENIPKGSEVIKLIATDKDSGAN SIMKFSTI  
>Locus\_27253\_Transcript\_1/1\_Confidence\_1.000\_Length\_387|. |sp|P33450|  
FAT\_DROME Cadherin-related tumor suppressor OS=Drosophila  
melanogaster GN=ft PE=1 SV=3|e=1.46219E-15|from=17|to=385|frame=2|  
Fragment\_2  
NGDDTGD FSVD  
>Locus\_27253\_Transcript\_1/1\_Confidence\_1.000\_Length\_387|. |sp|P33450|  
FAT\_DROME Cadherin-related tumor suppressor OS=Drosophila  
melanogaster GN=ft PE=1 SV=3|e=1.46219E-15|from=17|to=385|frame=2|  
Fragment\_3  
SNGIIRTQVLDRE  
>Locus\_27253\_Transcript\_1/1\_Confidence\_1.000\_Length\_387|. |sp|P33450|  
FAT\_DROME Cadherin-related tumor suppressor OS=Drosophila  
melanogaster GN=ft PE=1 SV=3|e=1.46219E-15|from=17|to=385|frame=2|  
Fragment\_1  
FSLNPVTGLLTLAGKLDYEEIQHYVLVVQAQDAGSPALTSTAMLYINVIDVNDNAPAFEP  
RTYTKRIPENIPKGSEVIKLIATDKDSGAN  
>Locus\_27253\_Transcript\_1/1\_Confidence\_1.000\_Length\_387|. |sp|P33450|  
FAT\_DROME Cadherin-related tumor suppressor OS=Drosophila  
melanogaster GN=ft PE=1 SV=3|e=1.46219E-15|from=17|to=385|frame=2|  
Fragment\_2  
SIMKFSTINGDDTGD FSVD  
>Locus\_27253\_Transcript\_1/1\_Confidence\_1.000\_Length\_387|. |sp|P33450|  
FAT\_DROME Cadherin-related tumor suppressor OS=Drosophila  
melanogaster GN=ft PE=1 SV=3|e=1.46219E-15|from=17|to=385|frame=2|  
Fragment\_3  
GIIRTQVLDRE  
>Locus\_27253\_Transcript\_1/1\_Confidence\_1.000\_Length\_387|. |sp|P33450|  
FAT\_DROME Cadherin-related tumor suppressor OS=Drosophila

melanogaster GN=ft PE=1 SV=3|e=1.36857E-13|from=8|to=373|frame=2|  
Fragment\_1  
SDVFSLNPTGLLLTAGKLDYEEIQHYVLVVQAQDAGSPALTSTAMLYINVIDVNDNAPA  
FEPRTYTKRIPENIPKGSEVIKLIATDKDSGANSIMKFSTINGDDTGDFSVD  
>Locus\_27253\_Transcript\_1/1\_Confidence\_1.000\_Length\_387|. |sp|P33450|  
FAT\_DROME Cadherin-related tumor suppressor OS=Drosophila  
melanogaster GN=ft PE=1 SV=3|e=1.36857E-13|from=8|to=373|frame=2|  
Fragment\_2  
SNGIIRTQRV  
>Locus\_27253\_Transcript\_1/1\_Confidence\_1.000\_Length\_387|. |sp|P33450|  
FAT\_DROME Cadherin-related tumor suppressor OS=Drosophila  
melanogaster GN=ft PE=1 SV=3|e=5.20055E-13|from=17|to=385|frame=2|  
Fragment\_1  
FSLNPVTGLLLTAGKLDYEEIQHYVLVVQAQDAG  
>Locus\_27253\_Transcript\_1/1\_Confidence\_1.000\_Length\_387|. |sp|P33450|  
FAT\_DROME Cadherin-related tumor suppressor OS=Drosophila  
melanogaster GN=ft PE=1 SV=3|e=5.20055E-13|from=17|to=385|frame=2|  
Fragment\_2  
SPALTSTAMLYINVIDVNDNAPAFEPRTYTKRIPENIPKGSEVIKLIATDKDSGANSIMK  
FSTINGDDTGDFSVD  
>Locus\_27253\_Transcript\_1/1\_Confidence\_1.000\_Length\_387|. |sp|P33450|  
FAT\_DROME Cadherin-related tumor suppressor OS=Drosophila  
melanogaster GN=ft PE=1 SV=3|e=5.20055E-13|from=17|to=385|frame=2|  
Fragment\_3  
NGIIRTQRVLDRE  
>Locus\_27253\_Transcript\_1/1\_Confidence\_1.000\_Length\_387|. |sp|P33450|  
FAT\_DROME Cadherin-related tumor suppressor OS=Drosophila  
melanogaster GN=ft PE=1 SV=3|e=6.79213E-13|from=17|to=385|frame=2|  
Fragment\_1  
FSLNPVTGLLLTAGKLDYEEIQHYVLVVQAQDAGSPALTSTAMLYINVIDVNDNAPAFEP  
RTYTKRIPENIPKGSEVIKLIATDKDSGANSIMKFSTINGDDTGDFSVD  
SNGIIRTQRVLDRE  
>Locus\_27253\_Transcript\_1/1\_Confidence\_1.000\_Length\_387|. |sp|P33450|  
FAT\_DROME Cadherin-related tumor suppressor OS=Drosophila  
melanogaster GN=ft PE=1 SV=3|e=6.79213E-13|from=17|to=367|frame=2|  
Fragment\_1  
FSLNPVTGLLLTAGKLDYEEIQHYVLVVQAQDAG  
>Locus\_27253\_Transcript\_1/1\_Confidence\_1.000\_Length\_387|. |sp|P33450|  
FAT\_DROME Cadherin-related tumor suppressor OS=Drosophila  
melanogaster GN=ft PE=1 SV=3|e=6.79213E-13|from=17|to=367|frame=2|  
Fragment\_2  
SPALTSTAMLYINVIDVNDNAPAFEPRTYTKRIPENIPKGSEVIKLIATDKDSGANSIMK  
FSTINGDDTGDFSVD  
>Locus\_27253\_Transcript\_1/1\_Confidence\_1.000\_Length\_387|. |sp|P33450|  
FAT\_DROME Cadherin-related tumor suppressor OS=Drosophila  
melanogaster GN=ft PE=1 SV=3|e=6.79213E-13|from=17|to=367|frame=2|  
Fragment\_3  
NGIIRTQ  
>Locus\_27253\_Transcript\_1/1\_Confidence\_1.000\_Length\_387|. |sp|P33450|  
FAT\_DROME Cadherin-related tumor suppressor OS=Drosophila  
melanogaster GN=ft PE=1 SV=3|e=1.51313E-12|from=11|to=385|frame=2|  
Fragment\_1  
DVFSLNPTGLLLTAGK  
>Locus\_27253\_Transcript\_1/1\_Confidence\_1.000\_Length\_387|. |sp|P33450|

FAT\_DROME Cadherin-related tumor suppressor OS=Drosophila  
melanogaster GN=ft PE=1 SV=3|e=1.51313E-12|from=11|to=385|frame=2|  
Fragment\_2  
LDYEEIQHYVLVVQAQDAGSPALTSTAMLYINVIDVNDNAPAFEPRTYTKRIPENIPKGS  
EVIKLIATDKDSGANSIMKFSTINGDDTGDFSVD SNGIIRTQ RVL DRE  
>Locus\_27253\_Transcript\_1/1\_Confidence\_1.000\_Length\_387|. |sp|P33450|  
FAT\_DROME Cadherin-related tumor suppressor OS=Drosophila  
melanogaster GN=ft PE=1 SV=3|e=7.50958E-12|from=17|to=346|frame=2|  
Fragment\_1  
FSLNPVTGLLTLAGKLDYEEIQHYVLVVQAQDAGSPALTS  
>Locus\_27253\_Transcript\_1/1\_Confidence\_1.000\_Length\_387|. |sp|P33450|  
FAT\_DROME Cadherin-related tumor suppressor OS=Drosophila  
melanogaster GN=ft PE=1 SV=3|e=7.50958E-12|from=17|to=346|frame=2|  
Fragment\_2  
TAMLYINVIDVNDNAPAFEPRTYTK  
>Locus\_27253\_Transcript\_1/1\_Confidence\_1.000\_Length\_387|. |sp|P33450|  
FAT\_DROME Cadherin-related tumor suppressor OS=Drosophila  
melanogaster GN=ft PE=1 SV=3|e=7.50958E-12|from=17|to=346|frame=2|  
Fragment\_3  
RIPENIPKGSEVIKLIATDKDSGANSIMKFSTINGDDTGDFSVD S  
>Locus\_27253\_Transcript\_1/1\_Confidence\_1.000\_Length\_387|. |sp|P33450|  
FAT\_DROME Cadherin-related tumor suppressor OS=Drosophila  
melanogaster GN=ft PE=1 SV=3|e=1.67296E-11|from=17|to=385|frame=2|  
Fragment\_1  
FSLNPVTGLLTLAGKLDYEEIQHYVLVVQAQDAG  
>Locus\_27253\_Transcript\_1/1\_Confidence\_1.000\_Length\_387|. |sp|P33450|  
FAT\_DROME Cadherin-related tumor suppressor OS=Drosophila  
melanogaster GN=ft PE=1 SV=3|e=1.67296E-11|from=17|to=385|frame=2|  
Fragment\_2  
SPALTSTAMLYINVIDVNDNAPAFEPRTYTKRIPENI  
>Locus\_27253\_Transcript\_1/1\_Confidence\_1.000\_Length\_387|. |sp|P33450|  
FAT\_DROME Cadherin-related tumor suppressor OS=Drosophila  
melanogaster GN=ft PE=1 SV=3|e=1.67296E-11|from=17|to=385|frame=2|  
Fragment\_3  
PKGSEVIKLIATDKDS  
>Locus\_27253\_Transcript\_1/1\_Confidence\_1.000\_Length\_387|. |sp|P33450|  
FAT\_DROME Cadherin-related tumor suppressor OS=Drosophila  
melanogaster GN=ft PE=1 SV=3|e=1.67296E-11|from=17|to=385|frame=2|  
Fragment\_4  
GANSIMKFSTINGDDTGDFSVD SNGIIRTQ RVL DRE  
>Locus\_27253\_Transcript\_1/1\_Confidence\_1.000\_Length\_387|. |sp|P33450|  
FAT\_DROME Cadherin-related tumor suppressor OS=Drosophila  
melanogaster GN=ft PE=1 SV=3|e=3.72697E-11|from=59|to=385|frame=2|  
Fragment\_1  
KLDYEEIQHYVLVVQAQDAGSPALTSTAMLYINVIDVNDNAPAFEPRTYTKRIPENIPKG  
SEVIKLIATDKDSGANSIMKFSTINGDDTG  
>Locus\_27253\_Transcript\_1/1\_Confidence\_1.000\_Length\_387|. |sp|P33450|  
FAT\_DROME Cadherin-related tumor suppressor OS=Drosophila  
melanogaster GN=ft PE=1 SV=3|e=3.72697E-11|from=59|to=385|frame=2|  
Fragment\_2  
FSVD  
>Locus\_27253\_Transcript\_1/1\_Confidence\_1.000\_Length\_387|. |sp|P33450|  
FAT\_DROME Cadherin-related tumor suppressor OS=Drosophila  
melanogaster GN=ft PE=1 SV=3|e=3.72697E-11|from=59|to=385|frame=2|

Fragment\_3  
SNGIIRTQRVLDRE

>Locus\_23907\_Transcript\_1/1\_Confidence\_1.000\_Length\_469|UNIGENE  
REPRESENTATIVE TRANSCRIPT|sp|P34082|FAS2\_DROME Fasciclin-2  
OS=Drosophila melanogaster GN=Fas2 PE=1 SV=1|e=5.61408E-41|from=15|  
to=467|frame=3|Fragment\_1

KTTKLVCIASGRPAPAVTFKRWGADVEMLPGPQPGDDRVLVLEQEVNS

>Locus\_23907\_Transcript\_1/1\_Confidence\_1.000\_Length\_469|UNIGENE  
REPRESENTATIVE TRANSCRIPT|sp|P34082|FAS2\_DROME Fasciclin-2  
OS=Drosophila melanogaster GN=Fas2 PE=1 SV=1|e=5.61408E-41|from=15|  
to=467|frame=3|Fragment\_2

ITNVVRSDDGLYECIARNKGDYTYKTGHITVEFPPTFEASKNQPVPVFSWDQRTANLSCLA  
ESIPNATIEWRLNDRPI

>Locus\_23907\_Transcript\_1/1\_Confidence\_1.000\_Length\_469|UNIGENE  
REPRESENTATIVE TRANSCRIPT|sp|P34082|FAS2\_DROME Fasciclin-2  
OS=Drosophila melanogaster GN=Fas2 PE=1 SV=1|e=5.61408E-41|from=15|  
to=467|frame=3|Fragment\_3

IEDRFYRIEGSGPQSNL

>Locus\_27787\_Transcript\_1/1\_Confidence\_1.000\_Length\_365|. |sp|P34082|  
FAS2\_DROME Fasciclin-2 OS=Drosophila melanogaster GN=Fas2 PE=1 SV=1|  
e=3.66529E-30|from=1|to=363|frame=-3|Fragment\_1

TIYHFRFAATNAVGPGPYSNIAQATPRRSPPEEPKLLVG

>Locus\_27787\_Transcript\_1/1\_Confidence\_1.000\_Length\_365|. |sp|P34082|  
FAS2\_DROME Fasciclin-2 OS=Drosophila melanogaster GN=Fas2 PE=1 SV=1|  
e=3.66529E-30|from=1|to=363|frame=-3|Fragment\_2

VSNEVDGGIVTSPYADHYELRWKIPADNGEPIDYYQLRYCPVQRQNGAWAELDSLGNARE  
LRAFETTAHELNDLLADSHYK

>Locus\_8734\_Transcript\_4/5\_Confidence\_0.692\_Length\_2062|UNIGENE  
REPRESENTATIVE TRANSCRIPT|sp|P42787|CBPD\_DROME Carboxypeptidase D  
OS=Drosophila melanogaster GN=svr PE=1 SV=2|e=2.0915E-167|from=8|  
to=2059|frame=2|Fragment\_1

SIGQSVKGYHLWVLEISANPGEHITGKPSIKYVGNMHGNEVVGREILLFLAKFLCENYLI  
DEQVTRIVNTTRIHLLPSMNPDGYDMAKPEEINNIVVGRNNAHNIDLNRNFPDQYRS

>Locus\_8734\_Transcript\_4/5\_Confidence\_0.692\_Length\_2062|UNIGENE  
REPRESENTATIVE TRANSCRIPT|sp|P42787|CBPD\_DROME Carboxypeptidase D  
OS=Drosophila melanogaster GN=svr PE=1 SV=2|e=2.0915E-167|from=8|  
to=2059|frame=2|Fragment\_2

LLNVKPEPETEAVMAWTLSEFVLSANLHNGALVANYPFDENPSNI

>Locus\_8734\_Transcript\_4/5\_Confidence\_0.692\_Length\_2062|UNIGENE  
REPRESENTATIVE TRANSCRIPT|sp|P42787|CBPD\_DROME Carboxypeptidase D  
OS=Drosophila melanogaster GN=svr PE=1 SV=2|e=2.0915E-167|from=8|  
to=2059|frame=2|Fragment\_3

ILQKVANPSDDVDFQHLARIYSNAHRKMHLGQPCAHPKEHFLNGITNGAAWYSVSGSM  
QDWNVVEADCFEITLGLGCVKYPGAALPELWLDNKMALLDYIELAHIGVRFVHSSIGN  
PISSAEVLVKGKHKHITKTGSKGEYHRLLLPGSYNITVSSYGYESQTVQIIVPDVKPYSVG  
YNFTLMRDDPQHWSAYDFRLIQHVVNTRYRTTNEIANYMAYLGNKYPNIAEFRTEYDDT  
SMLLHSLKITDQIGSSEEKFFH

>Locus\_8734\_Transcript\_4/5\_Confidence\_0.692\_Length\_2062|UNIGENE  
REPRESENTATIVE TRANSCRIPT|sp|P42787|CBPD\_DROME Carboxypeptidase D  
OS=Drosophila melanogaster GN=svr PE=1 SV=2|e=2.0915E-167|from=8|  
to=2059|frame=2|Fragment\_4

SEG

>Locus\_8734\_Transcript\_4/5\_Confidence\_0.692\_Length\_2062|UNIGENE REPRESENTATIVE TRANSCRIPT|sp|P42787|CBPD\_DROME Carboxypeptidase D OS=Drosophila melanogaster GN=svr PE=1 SV=2|e=2.0915E-167|from=8|to=2059|frame=2|Fragment\_5  
VGSEMLNTAEHLMAAFKIGEHEMQILRNAVHVIPVLDNFDSDIIQNYRLHEDVCNPE  
SFKQEFGERMIASNAKLVTAFAKLLWFGRYDFILNFGSGGCLSYPRVNDSGFIYDKLL  
NNMHNLINSTTSHETCCNNQGNQNHAEITERLTNLMYNEYNVPIVTVRNSCCKMPRQEQL  
ANVWRNSLKPLMSFLELIETGIQGAILGNTMNPLRHAVVTLKQFNRTFNVTRNLAYYKIM  
LPVGAYNV

>Locus\_8734\_Transcript\_2/5\_Confidence\_0.692\_Length\_2062|. |sp|P42787|  
CBPD\_DROME Carboxypeptidase D OS=Drosophila melanogaster GN=svr PE=1  
SV=2|e=1.038E-166|from=8|to=2059|frame=2|Fragment\_1  
SIGQSVKGYHLWVLEISANPGEHITGKPSIKYVGNMHGNEVVGREILLFVAKFLCENYLI  
DEQVTRIVNTTRIHLLPSMNPDGYDMAKPEEINNVVGRNNAHNIDLNRNFPDQYRS

>Locus\_8734\_Transcript\_2/5\_Confidence\_0.692\_Length\_2062|. |sp|P42787|  
CBPD\_DROME Carboxypeptidase D OS=Drosophila melanogaster GN=svr PE=1  
SV=2|e=1.038E-166|from=8|to=2059|frame=2|Fragment\_2  
LLNVKPEPETEAVMATLSERFVLSANLHNGALVANYPFDENPSNI

>Locus\_8734\_Transcript\_2/5\_Confidence\_0.692\_Length\_2062|. |sp|P42787|  
CBPD\_DROME Carboxypeptidase D OS=Drosophila melanogaster GN=svr PE=1  
SV=2|e=1.038E-166|from=8|to=2059|frame=2|Fragment\_3  
ILQKVANPSPDDVDFQHLARIYSNAHRKMHGQPCAEPKEHFLNGITNGAAWYSVSGSM  
QDWNVVEADCFEITLGLCVKYPRAEALPELWLDNKMALLDYIELAHIGVRFVHSSIGN  
PISSAEVLVKGRKHITRTGSKGEYHRLLLPGLYNITVSSYGYESQTVQIIVPDVKPYSVG  
YNFTLMRDDPQHWSAYDFRLIQHVVNTRYRTTNEIANYMAYLGNKYPNIAEFRTEYDDT  
SMLLHSLKITDQIGSSEEKFFH

>Locus\_8734\_Transcript\_2/5\_Confidence\_0.692\_Length\_2062|. |sp|P42787|  
CBPD\_DROME Carboxypeptidase D OS=Drosophila melanogaster GN=svr PE=1  
SV=2|e=1.038E-166|from=8|to=2059|frame=2|Fragment\_4  
SEG

>Locus\_8734\_Transcript\_2/5\_Confidence\_0.692\_Length\_2062|. |sp|P42787|  
CBPD\_DROME Carboxypeptidase D OS=Drosophila melanogaster GN=svr PE=1  
SV=2|e=1.038E-166|from=8|to=2059|frame=2|Fragment\_5  
VGSEMLNTAEHLMAAFEIGEHEKHIQILRNAVHVIPVLDNFDSDIIQNYRLHEDVCNPE  
SFKQEFGERMIASNAKLVTAFAKLLWFGRYDFILNFGSGGCLSYPRVNDSGFIYDKLL  
NNMHNLINSTTSHETCCNNQGNQNHAEITERLTNLMYNEYNVPIVTVRNSCCKMPRQEQL  
ANVWRNSLKPLMSFLELIETGIQGAILGNTMNPLRHAVVTLKQFNRTFNVTRNLAYYKIM  
LPVGAYNV

>Locus\_8734\_Transcript\_1/5\_Confidence\_0.692\_Length\_2062|. |sp|P42787|  
CBPD\_DROME Carboxypeptidase D OS=Drosophila melanogaster GN=svr PE=1  
SV=2|e=2.3124E-166|from=8|to=2059|frame=2|Fragment\_1  
SIGQSVKGYHLWVLEISANPGEHITGKPSIKYVGNMHGNEVVGREILLFVAKFLCENYLI  
DEQVTRIVNTTRIHLLPSMNPDGYDMAKPEEINNVVGRNNAHNIDLNRNFPDQYRS

>Locus\_8734\_Transcript\_1/5\_Confidence\_0.692\_Length\_2062|. |sp|P42787|  
CBPD\_DROME Carboxypeptidase D OS=Drosophila melanogaster GN=svr PE=1  
SV=2|e=2.3124E-166|from=8|to=2059|frame=2|Fragment\_2  
LLNVKPEPETEAVMATLSERFVLSANLHNGALVANYPFDENPSNI

>Locus\_8734\_Transcript\_1/5\_Confidence\_0.692\_Length\_2062|. |sp|P42787|  
CBPD\_DROME Carboxypeptidase D OS=Drosophila melanogaster GN=svr PE=1  
SV=2|e=2.3124E-166|from=8|to=2059|frame=2|Fragment\_3  
ILQKVANPSPDDVDFQHLARIYSNAHRKMHGQPCAEPKEHFLNGITNGAAWYSVSGSM  
QDWNVVEADCFEITLGLCVKYPGAELPELWLDNKMALLDYIELAHIGVRFVHSSIGN  
PISSAEVLVKGRKHITKTGSKGEYHRLLLPGSYNITVSSYGYESQTVQIIVPDVKPYSVG  
YNFTLMRDDPQHWSAYDFRLIQHVVNTRYRTTNEIANYMAYLGNKYPNIAEFRTEYDDT

SMLLHSLKITDQIGSSEEKFFH

>Locus\_8734\_Transcript\_1/5\_Confidence\_0.692\_Length\_2062|. |sp|P42787|  
CBPD\_DROME Carboxypeptidase D OS=Drosophila melanogaster GN=svr PE=1  
SV=2|e=2.3124E-166|from=8|to=2059|frame=2|Fragment\_4

SEG

>Locus\_8734\_Transcript\_1/5\_Confidence\_0.692\_Length\_2062|. |sp|P42787|  
CBPD\_DROME Carboxypeptidase D OS=Drosophila melanogaster GN=svr PE=1  
SV=2|e=2.3124E-166|from=8|to=2059|frame=2|Fragment\_5

VGSEMLNTAEHLMAAFEIGEHEKHIQILRNAVVHVIPVLDDNFDSIIQNYRLHEDVCNPE  
SFKQEFGERMIASNAADKLVTAFAKLLWFGRYDFILNFGSGGCLSYPRVNDSGFIYDKLL  
NNMHNLINSTTSHETCCNNQGNQNHAEITERLTNLMYNEYNPPIVTVRNSCCKMPRQEQ  
ANVWRNSLKPLMSFLELIETGIQGAILGNTMNPLRHAVVTLKQFNRTFNVTRNLAYYKIM  
LPVGAYNV

>Locus\_8734\_Transcript\_5/5\_Confidence\_0.692\_Length\_2062|. |sp|P42787|  
CBPD\_DROME Carboxypeptidase D OS=Drosophila melanogaster GN=svr PE=1  
SV=2|e=2.3124E-166|from=8|to=2059|frame=2|Fragment\_1

SIGQSVKGYHLWVLEISANPGEHITGKPSIKYVGNMHGNEVVGREILLLFAKFLCENYLI  
DEQVTRIVNTTRIHLLPSMNPDGYDMAKPEEINNVVGRNNAHNIDLNRNFPDQYRS

>Locus\_8734\_Transcript\_5/5\_Confidence\_0.692\_Length\_2062|. |sp|P42787|  
CBPD\_DROME Carboxypeptidase D OS=Drosophila melanogaster GN=svr PE=1  
SV=2|e=2.3124E-166|from=8|to=2059|frame=2|Fragment\_2

LLNVKPEPETEAVMATLSERFVLSANLHNGALVANYPFDENPSNI

>Locus\_8734\_Transcript\_5/5\_Confidence\_0.692\_Length\_2062|. |sp|P42787|  
CBPD\_DROME Carboxypeptidase D OS=Drosophila melanogaster GN=svr PE=1  
SV=2|e=2.3124E-166|from=8|to=2059|frame=2|Fragment\_3

ILQKVANPSPDDVDFQHLARIYSNAHRKMHLGQPCAHPKEHFLNGITNGAAWYSVSGSM  
QDWNYYVEADCFEITLGLGCVKYPGAALPELWLDNKMALLDYIELAHIGVRFVHSSIGN  
PISSAEVLVKGKHKHITKTGSKGEYHRLLLPGSYNITVSSYGYESQTVQIIVPDVKPYSVG  
YNFTLMRDDPQHWSAYDFRLIQHVVNTRYRTTNEIANYMAYLGNKYPNIAEFRTYDDT  
SMLLHSLKITDQIGSSEEKFFH

>Locus\_8734\_Transcript\_5/5\_Confidence\_0.692\_Length\_2062|. |sp|P42787|  
CBPD\_DROME Carboxypeptidase D OS=Drosophila melanogaster GN=svr PE=1  
SV=2|e=2.3124E-166|from=8|to=2059|frame=2|Fragment\_4

SEG

>Locus\_8734\_Transcript\_5/5\_Confidence\_0.692\_Length\_2062|. |sp|P42787|  
CBPD\_DROME Carboxypeptidase D OS=Drosophila melanogaster GN=svr PE=1  
SV=2|e=2.3124E-166|from=8|to=2059|frame=2|Fragment\_5

VGSEMLNTAEHLMAAFEIGEHEKHIQILRNAVVHVIPVLDDNFDSIIQNYRLHEDVCNPE  
SFKQEFGERMIASNAADKLVTAFAKLLWFGRYDFILNFGSGGCLSYPRVNDSGFIYDKLL  
NNMHNLINSTTSHETCCNNQGNQNHAEITERLTNLMYNEYNPPIVTVRNSCCKMPRQEQ  
ANVWRNSLKPLMSFLELIETGIQGAILGNTMNPLRHAVVTLKQFNRTFNVTRNLAYYKIM  
LPVGAYNV

>Locus\_8734\_Transcript\_3/5\_Confidence\_0.692\_Length\_2062|. |sp|P42787|  
CBPD\_DROME Carboxypeptidase D OS=Drosophila melanogaster GN=svr PE=1  
SV=2|e=3.0201E-166|from=8|to=2059|frame=2|Fragment\_1

SIGQSVKGYHLWVLEISANPGEHITGKPSIKYVGNMHGNEVVGREILLLFAKFLCENYLI  
DEQVTRIVNTTRIHLLPSMNPDGYDMAKPEEINNVVGRNNAHNIDLNRNFPDQYRS

>Locus\_8734\_Transcript\_3/5\_Confidence\_0.692\_Length\_2062|. |sp|P42787|  
CBPD\_DROME Carboxypeptidase D OS=Drosophila melanogaster GN=svr PE=1  
SV=2|e=3.0201E-166|from=8|to=2059|frame=2|Fragment\_2

LLNVKPEPETEAVMATLSERFVLSANLHNGALVANYPFDENPSNI

>Locus\_8734\_Transcript\_3/5\_Confidence\_0.692\_Length\_2062|. |sp|P42787|  
CBPD\_DROME Carboxypeptidase D OS=Drosophila melanogaster GN=svr PE=1  
SV=2|e=3.0201E-166|from=8|to=2059|frame=2|Fragment\_3

ILQKVANPSPDDVVFQHLARIYSNAHRKMHLGQPCAEHPKEHFLNGITNGAAWYSVSGSM  
QDWNVVEADCFEITLELGCVKYPGAEALPELWLDNKMALLDYIELAHIGVGRGFVHSSIGN  
PISSAEVLVKGRKHITKTGSKGEYHRLLLPGSYNITVSSYGYESQTVQIIIVPDVKPYSVG  
YNFTLMRDDPQHWSSAYDFRLIQHVVNTRYRTTNEIANYMAYLGNKYPNIAEFRTEYDDT  
SMLLHSLKITDQIGSSEEKFFH

>Locus\_8734\_Transcript\_3/5\_Confidence\_0.692\_Length\_2062|. |sp|P42787|  
CBPD\_DROME Carboxypeptidase D OS=Drosophila melanogaster GN=svr PE=1  
SV=2|e=3.0201E-166|from=8|to=2059|frame=2|Fragment\_4  
SEG

>Locus\_8734\_Transcript\_3/5\_Confidence\_0.692\_Length\_2062|. |sp|P42787|  
CBPD\_DROME Carboxypeptidase D OS=Drosophila melanogaster GN=svr PE=1  
SV=2|e=3.0201E-166|from=8|to=2059|frame=2|Fragment\_5  
VGSEMLNTAEHLMAAFEIGEHEKHIQILRNAVVHVIPVLDDNFDSIIQNYRLHEDVCNPE  
SFKQEFGERMIASNAKLVTAFAKLLWFGRYDFILNFGSGGCLSYPRVNDSGFIYDKLL  
NNMHNLINSTTSHETCCNNQGNQNHAEITERLTNLMYNEYNPVIVTVRNSCCKMPRQEQ  
ANVWRNSLKPLMSFLELIETGIEGTILGNLPLRHAVVTLKQFNRTFNVTRNLAYYKIM  
LPVGAYNV

>Locus\_8734\_Transcript\_2/5\_Confidence\_0.692\_Length\_2062|. |sp|P42787|  
CBPD\_DROME Carboxypeptidase D OS=Drosophila melanogaster GN=svr PE=1  
SV=2|e=1.48581E-80|from=11|to=2062|frame=2|Fragment\_1  
IGQSVKGYHLWVLEISANPGEHITGKPSIKYVGNMHGNEVVGREILLFLLFAKFLCENYLID  
EQVTRIVNTTRIHLPSMNPDGYDMAKP

>Locus\_8734\_Transcript\_2/5\_Confidence\_0.692\_Length\_2062|. |sp|P42787|  
CBPD\_DROME Carboxypeptidase D OS=Drosophila melanogaster GN=svr PE=1  
SV=2|e=1.48581E-80|from=11|to=2062|frame=2|Fragment\_2  
EEINNVVGRNNAHNIDLNRNFPDQYRS

>Locus\_8734\_Transcript\_2/5\_Confidence\_0.692\_Length\_2062|. |sp|P42787|  
CBPD\_DROME Carboxypeptidase D OS=Drosophila melanogaster GN=svr PE=1  
SV=2|e=1.48581E-80|from=11|to=2062|frame=2|Fragment\_3  
LLNVKPEPETEAVMATLSERFVLSANLHNGALVANYPFDENPSNIILQKVANPSPDDDV  
FQHLARIYSNAHRKMHLGQPCAEHPKEHFLNGITNGAAWYSVSGSMQDWNVVEADCFEIT  
LELGCVKYPRAEALPELWLDNKMALLDYIELAHIGVGRGFVHSSIGNPISSAEVLVKG

>Locus\_8734\_Transcript\_2/5\_Confidence\_0.692\_Length\_2062|. |sp|P42787|  
CBPD\_DROME Carboxypeptidase D OS=Drosophila melanogaster GN=svr PE=1  
SV=2|e=1.48581E-80|from=11|to=2062|frame=2|Fragment\_4  
RKHITRTGSKGEYHRLLLPGLYNITVSSYGYE

>Locus\_8734\_Transcript\_2/5\_Confidence\_0.692\_Length\_2062|. |sp|P42787|  
CBPD\_DROME Carboxypeptidase D OS=Drosophila melanogaster GN=svr PE=1  
SV=2|e=1.48581E-80|from=11|to=2062|frame=2|Fragment\_5  
SQTVQIIIVPDVKPYSVGYNFTLMRDDPQHWSSAYDFRLIQ

>Locus\_8734\_Transcript\_2/5\_Confidence\_0.692\_Length\_2062|. |sp|P42787|  
CBPD\_DROME Carboxypeptidase D OS=Drosophila melanogaster GN=svr PE=1  
SV=2|e=1.48581E-80|from=11|to=2062|frame=2|Fragment\_6  
HVVNTRYRTTNEIA

>Locus\_8734\_Transcript\_2/5\_Confidence\_0.692\_Length\_2062|. |sp|P42787|  
CBPD\_DROME Carboxypeptidase D OS=Drosophila melanogaster GN=svr PE=1  
SV=2|e=1.48581E-80|from=11|to=2062|frame=2|Fragment\_7  
NYMAYLGNKYPNIAE

>Locus\_8734\_Transcript\_2/5\_Confidence\_0.692\_Length\_2062|. |sp|P42787|  
CBPD\_DROME Carboxypeptidase D OS=Drosophila melanogaster GN=svr PE=1  
SV=2|e=1.48581E-80|from=11|to=2062|frame=2|Fragment\_8  
FRTEYDDTSMLLHSLKITDQIGSSEEKFFH

>Locus\_8734\_Transcript\_2/5\_Confidence\_0.692\_Length\_2062|. |sp|P42787|  
CBPD\_DROME Carboxypeptidase D OS=Drosophila melanogaster GN=svr PE=1

SV=2|e=1.48581E-80|from=11|to=2062|frame=2|Fragment\_9  
SEGVGSEMVLNTAEHLMAAFEIGECHKHIQILRNAVVHVIPVLD  
>Locus\_8734\_Transcript\_2/5\_Confidence\_0.692\_Length\_2062|. |sp|P42787|  
CBPD\_DROME Carboxypeptidase D OS=Drosophila melanogaster GN=svr PE=1  
SV=2|e=1.48581E-80|from=11|to=2062|frame=2|Fragment\_10  
DNFDSIIQNYRL  
>Locus\_8734\_Transcript\_2/5\_Confidence\_0.692\_Length\_2062|. |sp|P42787|  
CBPD\_DROME Carboxypeptidase D OS=Drosophila melanogaster GN=svr PE=1  
SV=2|e=1.48581E-80|from=11|to=2062|frame=2|Fragment\_11  
HEDVCNPESFKQEFGERMIASNADKLVTAFAKLLWFGRYDFIL  
>Locus\_8734\_Transcript\_2/5\_Confidence\_0.692\_Length\_2062|. |sp|P42787|  
CBPD\_DROME Carboxypeptidase D OS=Drosophila melanogaster GN=svr PE=1  
SV=2|e=1.48581E-80|from=11|to=2062|frame=2|Fragment\_12  
NFGSGGCGLSYPRVNDSGFIYDKLLNMHNLINS  
>Locus\_8734\_Transcript\_2/5\_Confidence\_0.692\_Length\_2062|. |sp|P42787|  
CBPD\_DROME Carboxypeptidase D OS=Drosophila melanogaster GN=svr PE=1  
SV=2|e=1.48581E-80|from=11|to=2062|frame=2|Fragment\_13  
TTSHETCCNNQ  
>Locus\_8734\_Transcript\_2/5\_Confidence\_0.692\_Length\_2062|. |sp|P42787|  
CBPD\_DROME Carboxypeptidase D OS=Drosophila melanogaster GN=svr PE=1  
SV=2|e=1.48581E-80|from=11|to=2062|frame=2|Fragment\_14  
GNQNHAE  
>Locus\_8734\_Transcript\_2/5\_Confidence\_0.692\_Length\_2062|. |sp|P42787|  
CBPD\_DROME Carboxypeptidase D OS=Drosophila melanogaster GN=svr PE=1  
SV=2|e=1.48581E-80|from=11|to=2062|frame=2|Fragment\_15  
ITERLTNLMYNEYNVPIVTVRNSCKMPRQEQLANVWRNSLKPLMSFLELIETGIQGAIL  
GNTMNPLRHAVVTLKQFNRTFNVTRNLAYYKIMLPVGAYNVT  
>Locus\_8734\_Transcript\_4/5\_Confidence\_0.692\_Length\_2062|. |sp|P42787|  
CBPD\_DROME Carboxypeptidase D OS=Drosophila melanogaster GN=svr PE=1  
SV=2|e=4.32303E-80|from=11|to=2062|frame=2|Fragment\_1  
IGQSVKGYHLWVLEISANPGEHITGKPSIKYVGNMHGNEVVGREILLLFAKFLCENYLID  
EQVTRIVNTTRIHLPSMNPDPGYDMAKP  
>Locus\_8734\_Transcript\_4/5\_Confidence\_0.692\_Length\_2062|. |sp|P42787|  
CBPD\_DROME Carboxypeptidase D OS=Drosophila melanogaster GN=svr PE=1  
SV=2|e=4.32303E-80|from=11|to=2062|frame=2|Fragment\_2  
EEINNVVGRNNAHNIDLNRNFPDQYRS  
>Locus\_8734\_Transcript\_4/5\_Confidence\_0.692\_Length\_2062|. |sp|P42787|  
CBPD\_DROME Carboxypeptidase D OS=Drosophila melanogaster GN=svr PE=1  
SV=2|e=4.32303E-80|from=11|to=2062|frame=2|Fragment\_3  
LLNVKPEPETEAVMAWTLSEFVLSANLHNGALVANYPFDENPSNIILQKVANPSPDDDV  
FQHLARIYSNAHRKMHGQPCAEHPKEHFLNGITNGAAWYSVSGSMQDWNVEADCFEIT  
LELGCVKYPGAEALPELWLDNKMALLDYIELAHIGVIRGFVHSSIGNPISSAEVLVKG  
>Locus\_8734\_Transcript\_4/5\_Confidence\_0.692\_Length\_2062|. |sp|P42787|  
CBPD\_DROME Carboxypeptidase D OS=Drosophila melanogaster GN=svr PE=1  
SV=2|e=4.32303E-80|from=11|to=2062|frame=2|Fragment\_4  
RKHITKTGSKGEYHRLLLPGSYNITVSSYGYE  
>Locus\_8734\_Transcript\_4/5\_Confidence\_0.692\_Length\_2062|. |sp|P42787|  
CBPD\_DROME Carboxypeptidase D OS=Drosophila melanogaster GN=svr PE=1  
SV=2|e=4.32303E-80|from=11|to=2062|frame=2|Fragment\_5  
SQTVQIIVPDVKPYSVGYNFTLMRDDPQHWSSAYDFRLIQ  
>Locus\_8734\_Transcript\_4/5\_Confidence\_0.692\_Length\_2062|. |sp|P42787|  
CBPD\_DROME Carboxypeptidase D OS=Drosophila melanogaster GN=svr PE=1  
SV=2|e=4.32303E-80|from=11|to=2062|frame=2|Fragment\_6  
HVVNTRYRTTNEIA

>Locus\_8734\_Transcript\_4/5\_Confidence\_0.692\_Length\_2062|. |sp|P42787|  
CBPD\_DROME Carboxypeptidase D OS=Drosophila melanogaster GN=svr PE=1  
SV=2|e=4.32303E-80|from=11|to=2062|frame=2|Fragment\_7  
NYMAYLGNKYPNIAE

>Locus\_8734\_Transcript\_4/5\_Confidence\_0.692\_Length\_2062|. |sp|P42787|  
CBPD\_DROME Carboxypeptidase D OS=Drosophila melanogaster GN=svr PE=1  
SV=2|e=4.32303E-80|from=11|to=2062|frame=2|Fragment\_8  
FRTEYDDTSMLLHSLKITDQIGSSEEKFFH

>Locus\_8734\_Transcript\_4/5\_Confidence\_0.692\_Length\_2062|. |sp|P42787|  
CBPD\_DROME Carboxypeptidase D OS=Drosophila melanogaster GN=svr PE=1  
SV=2|e=4.32303E-80|from=11|to=2062|frame=2|Fragment\_9  
SEGVGSEMLNTAEHLMAAFKIGEHEMQILRNAV

>Locus\_8734\_Transcript\_4/5\_Confidence\_0.692\_Length\_2062|. |sp|P42787|  
CBPD\_DROME Carboxypeptidase D OS=Drosophila melanogaster GN=svr PE=1  
SV=2|e=4.32303E-80|from=11|to=2062|frame=2|Fragment\_10  
VHVIPVLD

>Locus\_8734\_Transcript\_4/5\_Confidence\_0.692\_Length\_2062|. |sp|P42787|  
CBPD\_DROME Carboxypeptidase D OS=Drosophila melanogaster GN=svr PE=1  
SV=2|e=4.32303E-80|from=11|to=2062|frame=2|Fragment\_11  
DNFDSIIQNYRL

>Locus\_8734\_Transcript\_4/5\_Confidence\_0.692\_Length\_2062|. |sp|P42787|  
CBPD\_DROME Carboxypeptidase D OS=Drosophila melanogaster GN=svr PE=1  
SV=2|e=4.32303E-80|from=11|to=2062|frame=2|Fragment\_12  
HEDVCNPESFKQEFGERMIASNAKLVTAFFKLLWSGRYDFIL

>Locus\_8734\_Transcript\_4/5\_Confidence\_0.692\_Length\_2062|. |sp|P42787|  
CBPD\_DROME Carboxypeptidase D OS=Drosophila melanogaster GN=svr PE=1  
SV=2|e=4.32303E-80|from=11|to=2062|frame=2|Fragment\_13  
NFGSGGCLSYPRVNDSGFIYDKLLNMMHNLINS

>Locus\_8734\_Transcript\_4/5\_Confidence\_0.692\_Length\_2062|. |sp|P42787|  
CBPD\_DROME Carboxypeptidase D OS=Drosophila melanogaster GN=svr PE=1  
SV=2|e=4.32303E-80|from=11|to=2062|frame=2|Fragment\_14  
TTSHETCCNNQ

>Locus\_8734\_Transcript\_4/5\_Confidence\_0.692\_Length\_2062|. |sp|P42787|  
CBPD\_DROME Carboxypeptidase D OS=Drosophila melanogaster GN=svr PE=1  
SV=2|e=4.32303E-80|from=11|to=2062|frame=2|Fragment\_15  
GNQNHAE

>Locus\_8734\_Transcript\_4/5\_Confidence\_0.692\_Length\_2062|. |sp|P42787|  
CBPD\_DROME Carboxypeptidase D OS=Drosophila melanogaster GN=svr PE=1  
SV=2|e=4.32303E-80|from=11|to=2062|frame=2|Fragment\_16  
ITERLTNLMYNEYNVPIVTVRNSCKMPRQEQLANVWRNSLKPLMSFLELIETGIQGAIL  
GNTMNPLRHAVVTLKQFNRTFNVTRNLAYYKIMLPVGAYNVT

>Locus\_8734\_Transcript\_1/5\_Confidence\_0.692\_Length\_2062|. |sp|P42787|  
CBPD\_DROME Carboxypeptidase D OS=Drosophila melanogaster GN=svr PE=1  
SV=2|e=1.25781E-79|from=11|to=2062|frame=2|Fragment\_1  
IGQSVKGYHLWVLEISANPGEHITGKPSIKYVGNMHGNEVVGREILLFVAKFLCENYLID  
EQVTRIVNTRIHLSPMNPDPGYDMAKP

>Locus\_8734\_Transcript\_1/5\_Confidence\_0.692\_Length\_2062|. |sp|P42787|  
CBPD\_DROME Carboxypeptidase D OS=Drosophila melanogaster GN=svr PE=1  
SV=2|e=1.25781E-79|from=11|to=2062|frame=2|Fragment\_2  
EEINNVVGRNNAHNIDLNRNFPDQYRS

>Locus\_8734\_Transcript\_1/5\_Confidence\_0.692\_Length\_2062|. |sp|P42787|  
CBPD\_DROME Carboxypeptidase D OS=Drosophila melanogaster GN=svr PE=1  
SV=2|e=1.25781E-79|from=11|to=2062|frame=2|Fragment\_3  
LLNVKPEPETEAVMATLSERFVLSANLHNGALVANYPFDENPSNIILQKVANPSPDDDV

FQHLARIYSNAHRKMHLGQPCAEHPKEHFLNGITNGAAWYSVSGSMQDWNVVEADCFEIT  
LELGCVKYPGAEALPELWLDNKMALLDYIELAHIGVRGVHSSIGNPISSAEVLVKG  
>Locus\_8734\_Transcript\_1/5\_Confidence\_0.692\_Length\_2062|. |sp|P42787|  
CBPD\_DROME Carboxypeptidase D OS=Drosophila melanogaster GN=svr PE=1  
SV=2|e=1.25781E-79|from=11|to=2062|frame=2|Fragment\_4  
RKHITKTGSKGEYHRLLLPGSYNITVSSYGYE  
>Locus\_8734\_Transcript\_1/5\_Confidence\_0.692\_Length\_2062|. |sp|P42787|  
CBPD\_DROME Carboxypeptidase D OS=Drosophila melanogaster GN=svr PE=1  
SV=2|e=1.25781E-79|from=11|to=2062|frame=2|Fragment\_5  
SQTVOIIVPDVKPYVGVNFTLMRDDPQHWSSAYDFRLIQ  
>Locus\_8734\_Transcript\_1/5\_Confidence\_0.692\_Length\_2062|. |sp|P42787|  
CBPD\_DROME Carboxypeptidase D OS=Drosophila melanogaster GN=svr PE=1  
SV=2|e=1.25781E-79|from=11|to=2062|frame=2|Fragment\_6  
HVVNTRYRTTNEIA  
>Locus\_8734\_Transcript\_1/5\_Confidence\_0.692\_Length\_2062|. |sp|P42787|  
CBPD\_DROME Carboxypeptidase D OS=Drosophila melanogaster GN=svr PE=1  
SV=2|e=1.25781E-79|from=11|to=2062|frame=2|Fragment\_7  
NYMAYLGNKYPNIAE  
>Locus\_8734\_Transcript\_1/5\_Confidence\_0.692\_Length\_2062|. |sp|P42787|  
CBPD\_DROME Carboxypeptidase D OS=Drosophila melanogaster GN=svr PE=1  
SV=2|e=1.25781E-79|from=11|to=2062|frame=2|Fragment\_8  
FRTEYDDTSMLLHSLKITDQIGSSEEKFFH  
>Locus\_8734\_Transcript\_1/5\_Confidence\_0.692\_Length\_2062|. |sp|P42787|  
CBPD\_DROME Carboxypeptidase D OS=Drosophila melanogaster GN=svr PE=1  
SV=2|e=1.25781E-79|from=11|to=2062|frame=2|Fragment\_9  
SEGVGSEMVLNTAEHLMAAFEIGECHKHIQILRNAVVHVIPVLD  
>Locus\_8734\_Transcript\_1/5\_Confidence\_0.692\_Length\_2062|. |sp|P42787|  
CBPD\_DROME Carboxypeptidase D OS=Drosophila melanogaster GN=svr PE=1  
SV=2|e=1.25781E-79|from=11|to=2062|frame=2|Fragment\_10  
DNFDSIIQNYRL  
>Locus\_8734\_Transcript\_1/5\_Confidence\_0.692\_Length\_2062|. |sp|P42787|  
CBPD\_DROME Carboxypeptidase D OS=Drosophila melanogaster GN=svr PE=1  
SV=2|e=1.25781E-79|from=11|to=2062|frame=2|Fragment\_11  
HEDVCNPESFKQEFGERMIASNADKLVTAFFKLLWFGRYDFIL  
>Locus\_8734\_Transcript\_1/5\_Confidence\_0.692\_Length\_2062|. |sp|P42787|  
CBPD\_DROME Carboxypeptidase D OS=Drosophila melanogaster GN=svr PE=1  
SV=2|e=1.25781E-79|from=11|to=2062|frame=2|Fragment\_12  
NFGSGGCLSYPRVNDSGFIYDKLLNNMHNLINS  
>Locus\_8734\_Transcript\_1/5\_Confidence\_0.692\_Length\_2062|. |sp|P42787|  
CBPD\_DROME Carboxypeptidase D OS=Drosophila melanogaster GN=svr PE=1  
SV=2|e=1.25781E-79|from=11|to=2062|frame=2|Fragment\_13  
TTSHETCCNNQ  
>Locus\_8734\_Transcript\_1/5\_Confidence\_0.692\_Length\_2062|. |sp|P42787|  
CBPD\_DROME Carboxypeptidase D OS=Drosophila melanogaster GN=svr PE=1  
SV=2|e=1.25781E-79|from=11|to=2062|frame=2|Fragment\_14  
GNQNHAE  
>Locus\_8734\_Transcript\_1/5\_Confidence\_0.692\_Length\_2062|. |sp|P42787|  
CBPD\_DROME Carboxypeptidase D OS=Drosophila melanogaster GN=svr PE=1  
SV=2|e=1.25781E-79|from=11|to=2062|frame=2|Fragment\_15  
ITERLTNLMYNEYNVPIVTVRNSCKMPRQEQLANVWRNSLKPLMSFLELIETGIQGAIL  
GNTMNPLRHAVVTLKQFNRTFNVTRNLAYYKIMPLVPGAYNVT  
>Locus\_8734\_Transcript\_5/5\_Confidence\_0.692\_Length\_2062|. |sp|P42787|  
CBPD\_DROME Carboxypeptidase D OS=Drosophila melanogaster GN=svr PE=1  
SV=2|e=1.25781E-79|from=11|to=2062|frame=2|Fragment\_1

IGQSVKGHYLVWLEISANPGEHITGKPSIKYVGNMHGNEVVGREILLFLAKFLCENYLID  
EQVTRIVNTRIHLPSMNPDPGYDMAKP  
>Locus\_8734\_Transcript\_5/5\_Confidence\_0.692\_Length\_2062|. |sp|P42787|  
CBPD\_DROME Carboxypeptidase D OS=Drosophila melanogaster GN=svr PE=1  
SV=2|e=1.25781E-79|from=11|to=2062|frame=2|Fragment\_2  
EEINNVVGRNNAHNIDLNRNFPDQYRS  
>Locus\_8734\_Transcript\_5/5\_Confidence\_0.692\_Length\_2062|. |sp|P42787|  
CBPD\_DROME Carboxypeptidase D OS=Drosophila melanogaster GN=svr PE=1  
SV=2|e=1.25781E-79|from=11|to=2062|frame=2|Fragment\_3  
LLNVKPEPETEAVMAWTLSERFVLSANLHNGALVANYPFDENPSNIILQKVANPSPDDDV  
FQHLARIYSNAHRKMLGQPCAEHPKEHFLNGITNGAAWYSVSGSMQDWNYYVEADCFEIT  
LELGCVKYPGAELPELWLDNKMALLDYIELAHIGVIRGFVHSSIGNPISSAEVLVKG  
>Locus\_8734\_Transcript\_5/5\_Confidence\_0.692\_Length\_2062|. |sp|P42787|  
CBPD\_DROME Carboxypeptidase D OS=Drosophila melanogaster GN=svr PE=1  
SV=2|e=1.25781E-79|from=11|to=2062|frame=2|Fragment\_4  
RKHITKTGSKGEYHRLLLPGSYNITVSSYGYE  
>Locus\_8734\_Transcript\_5/5\_Confidence\_0.692\_Length\_2062|. |sp|P42787|  
CBPD\_DROME Carboxypeptidase D OS=Drosophila melanogaster GN=svr PE=1  
SV=2|e=1.25781E-79|from=11|to=2062|frame=2|Fragment\_5  
SQTVQIIVPDVKPYSVGYNFTLMRDDPQHWSSAYDFRLIQ  
>Locus\_8734\_Transcript\_5/5\_Confidence\_0.692\_Length\_2062|. |sp|P42787|  
CBPD\_DROME Carboxypeptidase D OS=Drosophila melanogaster GN=svr PE=1  
SV=2|e=1.25781E-79|from=11|to=2062|frame=2|Fragment\_6  
HVVNTRYRTTNEIA  
>Locus\_8734\_Transcript\_5/5\_Confidence\_0.692\_Length\_2062|. |sp|P42787|  
CBPD\_DROME Carboxypeptidase D OS=Drosophila melanogaster GN=svr PE=1  
SV=2|e=1.25781E-79|from=11|to=2062|frame=2|Fragment\_7  
NYMAYLGNKYPNIAE  
>Locus\_8734\_Transcript\_5/5\_Confidence\_0.692\_Length\_2062|. |sp|P42787|  
CBPD\_DROME Carboxypeptidase D OS=Drosophila melanogaster GN=svr PE=1  
SV=2|e=1.25781E-79|from=11|to=2062|frame=2|Fragment\_8  
FRTEYDDTSMLLHSLKITDQIGSSEEKFFH  
>Locus\_8734\_Transcript\_5/5\_Confidence\_0.692\_Length\_2062|. |sp|P42787|  
CBPD\_DROME Carboxypeptidase D OS=Drosophila melanogaster GN=svr PE=1  
SV=2|e=1.25781E-79|from=11|to=2062|frame=2|Fragment\_9  
SEGVGSEMVLNTAEHLMAAFEIGECHKHIQILRNAVVHVIPVLD  
>Locus\_8734\_Transcript\_5/5\_Confidence\_0.692\_Length\_2062|. |sp|P42787|  
CBPD\_DROME Carboxypeptidase D OS=Drosophila melanogaster GN=svr PE=1  
SV=2|e=1.25781E-79|from=11|to=2062|frame=2|Fragment\_10  
DNFDSIIQNYRL  
>Locus\_8734\_Transcript\_5/5\_Confidence\_0.692\_Length\_2062|. |sp|P42787|  
CBPD\_DROME Carboxypeptidase D OS=Drosophila melanogaster GN=svr PE=1  
SV=2|e=1.25781E-79|from=11|to=2062|frame=2|Fragment\_11  
HEDVCNPESFKQEFGERMIASNADKLVTAFFKLLWFGRYDFIL  
>Locus\_8734\_Transcript\_5/5\_Confidence\_0.692\_Length\_2062|. |sp|P42787|  
CBPD\_DROME Carboxypeptidase D OS=Drosophila melanogaster GN=svr PE=1  
SV=2|e=1.25781E-79|from=11|to=2062|frame=2|Fragment\_12  
NFGSGGCLSYPRVNDSGFIYDKLLNMHNLINS  
>Locus\_8734\_Transcript\_5/5\_Confidence\_0.692\_Length\_2062|. |sp|P42787|  
CBPD\_DROME Carboxypeptidase D OS=Drosophila melanogaster GN=svr PE=1  
SV=2|e=1.25781E-79|from=11|to=2062|frame=2|Fragment\_13  
TTSHETCCNNQ  
>Locus\_8734\_Transcript\_5/5\_Confidence\_0.692\_Length\_2062|. |sp|P42787|  
CBPD\_DROME Carboxypeptidase D OS=Drosophila melanogaster GN=svr PE=1

SV=2|e=1.25781E-79|from=11|to=2062|frame=2|Fragment\_14  
GNQNHAE  
>Locus\_8734\_Transcript\_5/5\_Confidence\_0.692\_Length\_2062|. |sp|P42787|  
CBPD\_DROME Carboxypeptidase D OS=Drosophila melanogaster GN=svr PE=1  
SV=2|e=1.25781E-79|from=11|to=2062|frame=2|Fragment\_15  
ITERLTNLMYNEYNVPITVTRNSCKMPRQEQLANVWRNSLKPLMSFLELIETGIQGAIL  
GNTMNPLRHAVVTLKQFNRTFNVTRNLAYYKIMLPVGAYNVT  
>Locus\_8734\_Transcript\_3/5\_Confidence\_0.692\_Length\_2062|. |sp|P42787|  
CBPD\_DROME Carboxypeptidase D OS=Drosophila melanogaster GN=svr PE=1  
SV=2|e=1.64275E-79|from=11|to=2062|frame=2|Fragment\_1  
IGQSVKGYHLVWLEISANPGEHITGKPSIKYVGNMHGNEVVGREILLLLFAKFLCENYLID  
EQVTRIVNTRIHLPSMNPDPGYDMAKP  
>Locus\_8734\_Transcript\_3/5\_Confidence\_0.692\_Length\_2062|. |sp|P42787|  
CBPD\_DROME Carboxypeptidase D OS=Drosophila melanogaster GN=svr PE=1  
SV=2|e=1.64275E-79|from=11|to=2062|frame=2|Fragment\_2  
EEINNVVGRNNAHNIDLNRNFPDQYRS  
>Locus\_8734\_Transcript\_3/5\_Confidence\_0.692\_Length\_2062|. |sp|P42787|  
CBPD\_DROME Carboxypeptidase D OS=Drosophila melanogaster GN=svr PE=1  
SV=2|e=1.64275E-79|from=11|to=2062|frame=2|Fragment\_3  
LLNVKPEPETEAVMATLSERFVLSANLHNGALVANYPFDENPSNIILQKVANPSPDDDV  
FQHLARIYSNAHRKMHGQPCAEHPKEHFLNGITNGAAWYSVSGSMQDWNVYVEADCFEIT  
LELGCVKYPGAEALPELWLDNKMALLDYIELAHIGVIRGFVHSSIGNPISSAEVLVKG  
>Locus\_8734\_Transcript\_3/5\_Confidence\_0.692\_Length\_2062|. |sp|P42787|  
CBPD\_DROME Carboxypeptidase D OS=Drosophila melanogaster GN=svr PE=1  
SV=2|e=1.64275E-79|from=11|to=2062|frame=2|Fragment\_4  
RKHITKTGSKGEYHRLLLPGSYNITVSSYGYE  
>Locus\_8734\_Transcript\_3/5\_Confidence\_0.692\_Length\_2062|. |sp|P42787|  
CBPD\_DROME Carboxypeptidase D OS=Drosophila melanogaster GN=svr PE=1  
SV=2|e=1.64275E-79|from=11|to=2062|frame=2|Fragment\_5  
SQTVQIIVDPVKPYSVGYNFTLMRDDPQHWSAYDFRLIQ  
>Locus\_8734\_Transcript\_3/5\_Confidence\_0.692\_Length\_2062|. |sp|P42787|  
CBPD\_DROME Carboxypeptidase D OS=Drosophila melanogaster GN=svr PE=1  
SV=2|e=1.64275E-79|from=11|to=2062|frame=2|Fragment\_6  
HVVNTRYRTTNEIA  
>Locus\_8734\_Transcript\_3/5\_Confidence\_0.692\_Length\_2062|. |sp|P42787|  
CBPD\_DROME Carboxypeptidase D OS=Drosophila melanogaster GN=svr PE=1  
SV=2|e=1.64275E-79|from=11|to=2062|frame=2|Fragment\_7  
NYMAYLGNKYPNIAE  
>Locus\_8734\_Transcript\_3/5\_Confidence\_0.692\_Length\_2062|. |sp|P42787|  
CBPD\_DROME Carboxypeptidase D OS=Drosophila melanogaster GN=svr PE=1  
SV=2|e=1.64275E-79|from=11|to=2062|frame=2|Fragment\_8  
FRTEYDDTSMMLHSLKITDQIGSSEEKFFH  
>Locus\_8734\_Transcript\_3/5\_Confidence\_0.692\_Length\_2062|. |sp|P42787|  
CBPD\_DROME Carboxypeptidase D OS=Drosophila melanogaster GN=svr PE=1  
SV=2|e=1.64275E-79|from=11|to=2062|frame=2|Fragment\_9  
SEGVGSEMVLNATAEHLMAAFEIGECHKHIQILRNAVVHVIPVLD  
>Locus\_8734\_Transcript\_3/5\_Confidence\_0.692\_Length\_2062|. |sp|P42787|  
CBPD\_DROME Carboxypeptidase D OS=Drosophila melanogaster GN=svr PE=1  
SV=2|e=1.64275E-79|from=11|to=2062|frame=2|Fragment\_10  
DNFDSIIQNYRL  
>Locus\_8734\_Transcript\_3/5\_Confidence\_0.692\_Length\_2062|. |sp|P42787|  
CBPD\_DROME Carboxypeptidase D OS=Drosophila melanogaster GN=svr PE=1  
SV=2|e=1.64275E-79|from=11|to=2062|frame=2|Fragment\_11  
HEDVCNPESFKQEFGERMIASNAKLVTAFFKLLWFGRYDFIL

>Locus\_8734\_Transcript\_3/5\_Confidence\_0.692\_Length\_2062|. |sp|P42787|  
CBPD\_DROME Carboxypeptidase D OS=Drosophila melanogaster GN=svr PE=1  
SV=2|e=1.64275E-79|from=11|to=2062|frame=2|Fragment\_12  
NFGSGGCLSYPRVNDSGFIYDKLLNNMHNLS

>Locus\_8734\_Transcript\_3/5\_Confidence\_0.692\_Length\_2062|. |sp|P42787|  
CBPD\_DROME Carboxypeptidase D OS=Drosophila melanogaster GN=svr PE=1  
SV=2|e=1.64275E-79|from=11|to=2062|frame=2|Fragment\_13  
TTSHETCCNNQ

>Locus\_8734\_Transcript\_3/5\_Confidence\_0.692\_Length\_2062|. |sp|P42787|  
CBPD\_DROME Carboxypeptidase D OS=Drosophila melanogaster GN=svr PE=1  
SV=2|e=1.64275E-79|from=11|to=2062|frame=2|Fragment\_14  
GNQNHAE

>Locus\_8734\_Transcript\_3/5\_Confidence\_0.692\_Length\_2062|. |sp|P42787|  
CBPD\_DROME Carboxypeptidase D OS=Drosophila melanogaster GN=svr PE=1  
SV=2|e=1.64275E-79|from=11|to=2062|frame=2|Fragment\_15  
ITERLTNLMYNEYNVPIVTVRNSCKMPRQEQLANVWRNSLKPLMSFLELIETGIEGTIL  
GNTLNPLRHAVVTLKQFNRTFNVTRNLAYYKIMPLVGYAVVT

>Locus\_28664\_Transcript\_1/1\_Confidence\_1.000\_Length\_379|UNIGENE  
REPRESENTATIVE TRANSCRIPT|sp|P48994|TRPL\_DROME Transient-receptor-  
potential-like protein OS=Drosophila melanogaster GN=trpl PE=1 SV=2|  
e=2.03619E-57|from=9|to=377|frame=3|Fragment\_1  
AYVQQIREINRNPDTIYIPREWDDFDPLIAEGLFAAANIFSALKLVHLFSINPHLGPL  
QISLGRMVIDIIFKFFFIYSLVLFACGLNQLLWYFADLERSKCYILPGGLPDWANHADA  
CMK

>Locus\_17161\_Transcript\_1/1\_Confidence\_1.000\_Length\_337|. |sp|P48994|  
TRPL\_DROME Transient-receptor-potential-like protein OS=Drosophila  
melanogaster GN=trpl PE=1 SV=2|e=1.33446E-48|from=3|to=335|frame=3|  
Fragment\_1  
ERSKCYILPGGLPDWANHADACMKWRSFGNLFESTQSLFWASFGMIGLENFELSGIKSYT  
RFWGLLMFGSYS

>Locus\_17161\_Transcript\_1/1\_Confidence\_1.000\_Length\_337|. |sp|P48994|  
TRPL\_DROME Transient-receptor-potential-like protein OS=Drosophila  
melanogaster GN=trpl PE=1 SV=2|e=1.33446E-48|from=3|to=335|frame=3|  
Fragment\_2  
AMMSNSYAMIDEHSDTEWKFARTRLWM

>Locus\_1548\_Transcript\_2/11\_Confidence\_0.600\_Length\_2317|UNIGENE  
REPRESENTATIVE TRANSCRIPT|"sp|P53624|MA121\_DROME Mannosyl-  
oligosaccharide alpha-1,2-mannosidase isoform A OS=Drosophila  
melanogaster GN=alpha-Man-I PE=1 SV=2"|e=0|from=597|to=2036|frame=3|  
Fragment\_1  
PSAPTITNGEDSDPET

>Locus\_1548\_Transcript\_2/11\_Confidence\_0.600\_Length\_2317|UNIGENE  
REPRESENTATIVE TRANSCRIPT|"sp|P53624|MA121\_DROME Mannosyl-  
oligosaccharide alpha-1,2-mannosidase isoform A OS=Drosophila  
melanogaster GN=alpha-Man-I PE=1 SV=2"|e=0|from=597|to=2036|frame=3|  
Fragment\_2  
RARRDKVKEMRLAWAGYERHAWGANEVRPVSGAAHTSSIFGSASLGATIIDSMDTLLVM  
GMTEEYERARKWVEEFTVDNLNIEVSVFEMNIRFIGGFLACYALTGDELFKAKEVAD  
KLLPAFQPTPTGIPHALVNLKTGESKKYPWTGGFSSILAEFGTLHLEFTYLSGITGDEIYR  
DKVQHRSIIRKIDKVNGLYPNYLNPKTGKWGQHMSLALGDSFFEYLLKAWLQSGRQD  
AEARVMYDEAMAAITEKMIKRSHQSGLTVAELKYEKVEHKMDHLACFAGGLYGLGAQTL  
QNDVSDSYLLIGEQLAATCHESYDRTPKLGPEFRFTEAVEARAIKTTEKYYILRPETI

ESYFVLWRLTKNQYRDWGWAEVQAIEKNCRASGGYTG IKNVYLEDSPKDDVQQSFFLAE  
TLKYLYLLFSDDSLIPDKWVFNTEAHPLPIKGANPLYRSHTAT  
>Locus\_1548\_Transcript\_3/11\_Confidence\_0.600\_Length\_2298|.|"sp|  
P53624|MA121\_DROME Mannosyl-oligosaccharide alpha-1,2-mannosidase  
isoform A OS=Drosophila melanogaster GN=alpha-Man-I PE=1 SV=2"|e=0|  
from=597|to=2036|frame=3|Fragment\_1  
PSAPTITNGEDSDPET  
>Locus\_1548\_Transcript\_3/11\_Confidence\_0.600\_Length\_2298|.|"sp|  
P53624|MA121\_DROME Mannosyl-oligosaccharide alpha-1,2-mannosidase  
isoform A OS=Drosophila melanogaster GN=alpha-Man-I PE=1 SV=2"|e=0|  
from=597|to=2036|frame=3|Fragment\_2  
RARRDKVKEMRLAWAGYERHAWGANEVRPVSGAAHTSSIFGSASLGATIIDSMDTLLVM  
GMTEEYERARKWVEEFTVDNLNIEVSFEMNIRFIGGFLACYALTGDEL FKEKAKEVAD  
KLLPAFQPTGIPHALVNLKTGESKKYPWTGGFSSILAEFGTLHLEFTYLS DITGDEIYR  
DKVQHRSIIKQIDKVNGLYPNYLNPKTGKWKQHMSL GALGDSFFEYLLKAWLQSGRQD  
AEARVMYDEAMAAITEKMIKRSHQSGLT YVAELKYEKVEHKMDHLACFAGGLYGLGAQTL  
QNDVSDSYLLIGEQLAATCHESYDRTPKLG PESFRFTEAVEARAIKTTEKYYILRPETI  
ESYFVLWRLTKNQYRDWGWAEVQAIEKNCRASGGYTG IKNVYLEDSPKDDVQQSFFLAE  
TLKYLYLLFSDDSLIPDKWVFNTEAHPLPIKGANPLYRSHTAT  
>Locus\_1548\_Transcript\_4/11\_Confidence\_0.600\_Length\_2298|.|"sp|  
P53624|MA121\_DROME Mannosyl-oligosaccharide alpha-1,2-mannosidase  
isoform A OS=Drosophila melanogaster GN=alpha-Man-I PE=1 SV=2"|e=0|  
from=597|to=2036|frame=3|Fragment\_1  
PSAPTITNGEDSDPET  
>Locus\_1548\_Transcript\_4/11\_Confidence\_0.600\_Length\_2298|.|"sp|  
P53624|MA121\_DROME Mannosyl-oligosaccharide alpha-1,2-mannosidase  
isoform A OS=Drosophila melanogaster GN=alpha-Man-I PE=1 SV=2"|e=0|  
from=597|to=2036|frame=3|Fragment\_2  
RARRDKVKEMRLAWAGYERHAWGANEVRPVSGAAHTSSIFGSASLGATIIDSMDTLLVM  
GMTEEYERARKWVEEFTVDNLNIEVSFEMNIRFIGGFLACYALTGDEL FKEKAKEVAD  
KLLPAFQPTGIPHALVNLKTGESKKYPWTGGFSSILAEFGTLHLEFTYLS DITGDEIYR  
DKVQHRSIIKQIDKVNGLYPNYLNPKTGKWKQHMSL GALGDSFFEYLLKAWLQSGRQD  
AEARVMYDEAMAAITEKMIKRSHQSGLT YVAELKYEKVEHKMDHLACFAGGLYGLGAQTL  
QNDVSDSYLLIGEQLAATCHESYDRTPKLG PESFRFTEAVEARAIKTTEKYYILRPETI  
ESYFVLWRLTKNQYRDWGWAEVQAIEKNCRASGGYTG IKNVYLEDSPKDDVQQSFFLAE  
TLKYLYLLFSDDSLIPDKWVFNTEAHPLPIKGANPLYRSHTAT  
>Locus\_1548\_Transcript\_5/11\_Confidence\_0.571\_Length\_2298|.|"sp|  
P53624|MA121\_DROME Mannosyl-oligosaccharide alpha-1,2-mannosidase  
isoform A OS=Drosophila melanogaster GN=alpha-Man-I PE=1 SV=2"|e=0|  
from=597|to=2036|frame=3|Fragment\_1  
PSAPTITNGEDSDPET  
>Locus\_1548\_Transcript\_5/11\_Confidence\_0.571\_Length\_2298|.|"sp|  
P53624|MA121\_DROME Mannosyl-oligosaccharide alpha-1,2-mannosidase  
isoform A OS=Drosophila melanogaster GN=alpha-Man-I PE=1 SV=2"|e=0|  
from=597|to=2036|frame=3|Fragment\_2  
RARRDKVKEMRLAWAGYERHAWGANEVRPVSGAAHTSSIFGSASLGATIIDSMDTLLVM  
GMTEEYERARKWVEEFTVDNLNIEVSFEMNIRFIGGFLACYALTGDEL FKEKAKEVAD  
KLLPAFQPTGIPHALVNLKTGESKKYPWTGGFSSILAEFGTLHLEFTYLS DITGDEIYR  
DKVQHRSIIKQIDKVNGLYPNYLNPKTGKWKQHMSL GALGDSFFEYLLKAWLQSGRQD  
AEARVMYDEAMAAITEKMIKRSHQSGLT YVAELKYEKVEHKMDHLACFAGGLYGLGAQTL  
QNDVSDSYLLIGEQLAATCHESYDRTPKLG PESFRFTEAVEARAIKTTEKYYILRPETI  
ESYFVLWRLTKNQYRDWGWAEVQAIEKNCRASGGYTG IKNVYLEDSPKDDVQQSFFLAE  
TLKYLYLLFSDDSLIPDKWVFNTEAHPLPIKGANPLYRSHTAT  
>Locus\_1548\_Transcript\_6/11\_Confidence\_0.600\_Length\_2298|.|"sp|

P53624|MA121\_DR0ME Mannosyl-oligosaccharide alpha-1,2-mannosidase isoform A OS=Drosophila melanogaster GN=alpha-Man-I PE=1 SV=2"|e=0| from=597|to=2036|frame=3|Fragment\_1 PSAPTITNGEDSDPET

>Locus\_1548\_Transcript\_6/11\_Confidence\_0.600\_Length\_2298|.|"sp| P53624|MA121\_DR0ME Mannosyl-oligosaccharide alpha-1,2-mannosidase isoform A OS=Drosophila melanogaster GN=alpha-Man-I PE=1 SV=2"|e=0| from=597|to=2036|frame=3|Fragment\_2

RARRDKVKEMRLAWAGYERHAWGANEVRPVSGAHTSSIFGSASLGATIIDSMDTLLVM GMTEEYERARKWVEEFTVDNLNIEVSVFEMNIRFIGGFLACYALTGDELFEKAKEVAD KLLPAFQPTTGIPHALVNLKTGESKKYPWTGGFSSILAEFGTLHLEFTYLSGITGDEIYR DKVQHRSIIKQIDKVNGLYPNYLNPKTGKWGQHMSL GALGDSFFEYLLKAWLQSGRQD AEARVMYDEAMAAITEKMIKRSHQSGLTYYAELKYEKVEHKMDHLACFAGGLYGLGAQTL QNDVSDSYLLIGEQLAATCHESYDRTPKLGPEFRFTEAVEARAIKTTEKYYILRPETI ESYFVLWRLTKNQKYRDWGWEAVQAIEKNCRASGGYTG IKNVYLEDSPKDDVQQSFFLAE TLKYLYLLFSDDSLIPDKWVFNTAEHPLPIKGANPLYRSHTAT

>Locus\_1548\_Transcript\_7/11\_Confidence\_0.543\_Length\_2298|.|"sp| P53624|MA121\_DR0ME Mannosyl-oligosaccharide alpha-1,2-mannosidase isoform A OS=Drosophila melanogaster GN=alpha-Man-I PE=1 SV=2"|e=0| from=597|to=2036|frame=3|Fragment\_1 PSAPTITNGEDSDPET

>Locus\_1548\_Transcript\_7/11\_Confidence\_0.543\_Length\_2298|.|"sp| P53624|MA121\_DR0ME Mannosyl-oligosaccharide alpha-1,2-mannosidase isoform A OS=Drosophila melanogaster GN=alpha-Man-I PE=1 SV=2"|e=0| from=597|to=2036|frame=3|Fragment\_2

RARRDKVKEMRLAWAGYERHAWGANEVRPVSGAHTSSIFGSASLGATIIDSMDTLLVM GMTEEYERARKWVEEFTVDNLNIEVSVFEMNIRFIGGFLACYALTGDELFEKAKEVAD KLLPAFQPTTGIPHALVNLKTGESKKYPWTGGFSSILAEFGTLHLEFTYLSGITGDEIYR DKVQHRSIIKQIDKVNGLYPNYLNPKTGKWGQHMSL GALGDSFFEYLLKAWLQSGRQD AEARVMYDEAMAAITEKMIKRSHQSGLTYYAELKYEKVEHKMDHLACFAGGLYGLGAQTL QNDVSDSYLLIGEQLAATCHESYDRTPKLGPEFRFTEAVEARAIKTTEKYYILRPETI ESYFVLWRLTKNQKYRDWGWEAVQAIEKNCRASGGYTG IKNVYLEDSPKDDVQQSFFLAE TLKYLYLLFSDDSLIPDKWVFNTAEHPLPIKGANPLYRSHTAT

>Locus\_1548\_Transcript\_8/11\_Confidence\_0.571\_Length\_2298|.|"sp| P53624|MA121\_DR0ME Mannosyl-oligosaccharide alpha-1,2-mannosidase isoform A OS=Drosophila melanogaster GN=alpha-Man-I PE=1 SV=2"|e=0| from=597|to=2036|frame=3|Fragment\_1 PSAPTITNGEDSDPET

>Locus\_1548\_Transcript\_8/11\_Confidence\_0.571\_Length\_2298|.|"sp| P53624|MA121\_DR0ME Mannosyl-oligosaccharide alpha-1,2-mannosidase isoform A OS=Drosophila melanogaster GN=alpha-Man-I PE=1 SV=2"|e=0| from=597|to=2036|frame=3|Fragment\_2

RARRDKVKEMRLAWAGYERHAWGANEVRPVSGAHTSSIFGSASLGATIIDSMDTLLIM GMTEEYERARKWVEEFTVDNLNIEVSVFEMNIRFIGGFLACYALTGDELFEKAKEVAD KLLPAFQPTTGIPHALVNLKTGESKKYPWTGGFSSILAEFGTLHLEFTYLSGITGDEIYR DKVQHRSIIKQIDKVNGLYPNYLNPKTGKWGQHMSL GALGDSFFEYLLKAWLQSGRQD AEARVMYDEAMAAITEKMIKRSHQSGLTYYAELKYEKVEHKMDHLACFAGGLYGLGAQTL QNDVSDSYLLIGEQLAATCHESYDRTPKLGPEFRFTEAVEARAIKTTEKYYILRPETI ESYFVLWRLTKNQKYRDWGWEAVQAIEKNCRASGGYTG IKNVYLEDSPKDDVQQSFFLAE TLKYLYLLFSDDSLIPDKWVFNTAEHPLPIKGANPLYRSHTAT

>Locus\_1548\_Transcript\_9/11\_Confidence\_0.543\_Length\_2298|.|"sp| P53624|MA121\_DR0ME Mannosyl-oligosaccharide alpha-1,2-mannosidase isoform A OS=Drosophila melanogaster GN=alpha-Man-I PE=1 SV=2"|e=0| from=597|to=2036|frame=3|Fragment\_1

PSAPTITNGEDSDPET

>Locus\_1548\_Transcript\_9/11\_Confidence\_0.543\_Length\_2298|.|"sp|  
P53624|MA121\_DR0ME Mannosyl-oligosaccharide alpha-1,2-mannosidase  
isoform A OS=Drosophila melanogaster GN=alpha-Man-I PE=1 SV=2"|e=0|  
from=597|to=2036|frame=3|Fragment\_2

RARRDKVKEMMRHAWAGYERHAWGANVSRPVSGAAHTSSIFGSASLGATIIDSMDTLLVM  
GMTEEYERARKWVEEFTVDNLNIEVSVFEMNIRFIGGFLACYALTGDELFEKAKEVAD  
KLLPAFQPTPTGIPHALVNLKTGESKYPWTGGFSSILAIEFGTLHLEFTYLSGITGDEIYR  
DKVQHRSIIKQIDKVNGLYPNYLNPKTGKWGQHMSLGALGDSFFEYLLKAWLQSGRQD  
AEARVMYDEAMAAITEKMIKRSHQSGITYVAELKYEKVEHKMDHLACFAGGLYGLGAQTL  
QNDVSDSYLLIGEQLAATCHESYDRTPTKLGPESEFRFTEAVEARAIKTTEKYYILRPETI  
ESYFVLWRLTKNQKYRDWGWEAVQAIEKNCRASGGYTGKKNVYLEDSPKDDVQSFLLAE  
TLKYLYLLFSDDSLIPDKWVFNTAEHPLPIKANPLYRSHTAT

>Locus\_1548\_Transcript\_10/11\_Confidence\_0.571\_Length\_2298|.|"sp|  
P53624|MA121\_DR0ME Mannosyl-oligosaccharide alpha-1,2-mannosidase  
isoform A OS=Drosophila melanogaster GN=alpha-Man-I PE=1 SV=2"|e=0|  
from=597|to=2036|frame=3|Fragment\_1

PSAPTITNGEDSDPET

>Locus\_1548\_Transcript\_10/11\_Confidence\_0.571\_Length\_2298|.|"sp|  
P53624|MA121\_DR0ME Mannosyl-oligosaccharide alpha-1,2-mannosidase  
isoform A OS=Drosophila melanogaster GN=alpha-Man-I PE=1 SV=2"|e=0|  
from=597|to=2036|frame=3|Fragment\_2

RARRDKVKEMRLAWAGYERHAWGANVSRPVSGAAHTSSIFGSASLGATIIDSMDTLLVM  
GMTEEYERARKWVEEFTVDNLNIEVSVFEMNIRFIGGFLACYALTGDELFEKAKEVAD  
KLLPAFQPTPTGIPHALVNLKTGESKYPWTGGFSSILAIEFGTLHLEFTYLSGITGDEIYR  
DKVQHRSIIKQIDKVNGLYPNYLNPKTGKWGQHMSLGALGDSFFEYLLKAWLQSGRQD  
AEARVMYDEAMAAITEKMIKRSHQSGITYVAELKYEKVEHKMDHLACFAGGLYGLGAQTL  
QNDVSDSYLLIGEQLAATCHESYDRTPTKLGPESEFRFTEAVEARAIKTTEKYYILRPETI  
ESYFVLWRLTKNQKYRDWGWEAVQAIEKNCRASGGYTGKKNVYLEDSPKDDVQSFLLAE  
TLKYLYLLFSDDSLIPDKWVFNTAEHPLPIKANPLYRSHTAT

>Locus\_1548\_Transcript\_11/11\_Confidence\_0.600\_Length\_2298|.|"sp|  
P53624|MA121\_DR0ME Mannosyl-oligosaccharide alpha-1,2-mannosidase  
isoform A OS=Drosophila melanogaster GN=alpha-Man-I PE=1 SV=2"|e=0|  
from=597|to=2036|frame=3|Fragment\_1

PSAPTITNGEDSDPET

>Locus\_1548\_Transcript\_11/11\_Confidence\_0.600\_Length\_2298|.|"sp|  
P53624|MA121\_DR0ME Mannosyl-oligosaccharide alpha-1,2-mannosidase  
isoform A OS=Drosophila melanogaster GN=alpha-Man-I PE=1 SV=2"|e=0|  
from=597|to=2036|frame=3|Fragment\_2

RARRDKVKEMRLAWAGYERHAWGANVSRPVSGAAHTSSIFGSASLGATIIDSMDTLLVM  
GMTEEYERARKWVEEFTVDNLNIEVSVFEMNIRFIGGFLACYALTGDELFEKAKEVAD  
KLLPAFQPTPTGIPHALVNLKTGESKYPWTGGFSSILAIEFGTLHLEFTYLSGITGDEIYR  
DKVQHRSIIKQIDKVNGLYPNYLNPKTGKWGQHMSLGALGDSFFEYLLKAWLQSGRQD  
AEARVMYDEAMAAITEKMIKRSHQSGITYVAELKYEKVEHKMDHLACFAGGLYGLGAQTL  
QNDVSDSYLLIGEQLAATCHESYDRTPTKLGPESEFRFTEAVEARAIKTTEKYYILRPETI  
ESYFVLWRLTKNQKYRDWGWEAVQAIEKNCRASGGYTGKKNVYLEDSPKDDVQSFLLAE  
TLKYLYLLFSDDSLIPDKWVFNTAEHPLPIKANPLYRSHTAT

>Locus\_23182\_Transcript\_1/2\_Confidence\_0.750\_Length\_317|.|"sp|  
P53624|MA121\_DR0ME Mannosyl-oligosaccharide alpha-1,2-mannosidase  
isoform A OS=Drosophila melanogaster GN=alpha-Man-I PE=1 SV=2"|  
e=1.66626E-27|from=19|to=312|frame=1|Fragment\_1

GEDSDPET

>Locus\_23182\_Transcript\_1/2\_Confidence\_0.750\_Length\_317|.|"sp|  
P53624|MA121\_DR0ME Mannosyl-oligosaccharide alpha-1,2-mannosidase

isoform A OS=Drosophila melanogaster GN=alpha-Man-I PE=1 SV=2" |  
e=1.66626E-27|from=19|to=312|frame=1|Fragment\_2  
RARRDKVKEMMRHAWAGYERHAWGANEVRPVSGAHTSSIFGSASLGATIIDSMDTLLVM  
GMTEEYERARKWVEEEFTVDNLNIEVSVFE  
>Locus\_23182\_Transcript\_2/2\_Confidence\_0.750\_Length\_317|.|"sp|  
P53624|MA121\_DROME Mannosyl-oligosaccharide alpha-1,2-mannosidase  
isoform A OS=Drosophila melanogaster GN=alpha-Man-I PE=1 SV=2" |  
e=1.66626E-27|from=19|to=312|frame=1|Fragment\_1  
GEDSDPET  
>Locus\_23182\_Transcript\_2/2\_Confidence\_0.750\_Length\_317|.|"sp|  
P53624|MA121\_DROME Mannosyl-oligosaccharide alpha-1,2-mannosidase  
isoform A OS=Drosophila melanogaster GN=alpha-Man-I PE=1 SV=2" |  
e=1.66626E-27|from=19|to=312|frame=1|Fragment\_2  
RARRDKVKEMMRHAWAGYERHAWGANEVRPVSGAHTSSIFGSASLGATIIDSMDTLLVM  
GMTEEYERARKWVEEEFTVDNLNIEVSVFE  
>Locus\_1218\_Transcript\_1/3\_Confidence\_0.667\_Length\_878|UNIGENE  
REPRESENTATIVE TRANSCRIPT|sp|P81928|140U\_DROME RPII140-upstream gene  
protein OS=Drosophila melanogaster GN=140up PE=2 SV=2|e=9.93193E-50|  
from=22|to=699|frame=1|Fragment\_1  
LIAGVMPI  
>Locus\_1218\_Transcript\_1/3\_Confidence\_0.667\_Length\_878|UNIGENE  
REPRESENTATIVE TRANSCRIPT|sp|P81928|140U\_DROME RPII140-upstream gene  
protein OS=Drosophila melanogaster GN=140up PE=2 SV=2|e=9.93193E-50|  
from=22|to=699|frame=1|Fragment\_2  
TDHDILPDTKTTAEMIKKLESETPKDRLYKMFSMDEFGIISPELTSIVQATSFALTGA  
VYGGFIKSKMAYEDFMSNNQATSFTSMQEAQKQLQNQVTIGFGKGFMWGWRLALFTCSY  
ITITTVISVYRDRSSIWEYLAAGSLTGALYKFRMGPKGMI  
>Locus\_1218\_Transcript\_1/3\_Confidence\_0.667\_Length\_878|UNIGENE  
REPRESENTATIVE TRANSCRIPT|sp|P81928|140U\_DROME RPII140-upstream gene  
protein OS=Drosophila melanogaster GN=140up PE=2 SV=2|e=9.93193E-50|  
from=22|to=699|frame=1|Fragment\_3  
IAGTISLTVLYLTGTTVQELRHWSYQLEETR  
>Locus\_1218\_Transcript\_1/3\_Confidence\_0.667\_Length\_878|UNIGENE  
REPRESENTATIVE TRANSCRIPT|sp|P81928|140U\_DROME RPII140-upstream gene  
protein OS=Drosophila melanogaster GN=140up PE=2 SV=2|e=9.93193E-50|  
from=22|to=699|frame=1|Fragment\_4  
NAKRQMQSGPRTEDP  
>Locus\_1218\_Transcript\_2/3\_Confidence\_0.667\_Length\_710|.|"sp|P81928|  
140U\_DROME RPII140-upstream gene protein OS=Drosophila melanogaster  
GN=140up PE=2 SV=2|e=1.01778E-40|from=1|to=531|frame=1|Fragment\_1  
SPELTSIVQATSFALTGAVYGGFIKSKMAYEDFMSNNQATSFTSMQEAQKQLQNQVTIG  
FGKGFMWGWRLALFTCSYITITTVISVYRDRSSIWEYLAAGSLTGALYKFRMGPKGMI  
>Locus\_1218\_Transcript\_2/3\_Confidence\_0.667\_Length\_710|.|"sp|P81928|  
140U\_DROME RPII140-upstream gene protein OS=Drosophila melanogaster  
GN=140up PE=2 SV=2|e=1.01778E-40|from=1|to=531|frame=1|Fragment\_2  
IAGTISLTVLYLTGTTVQELRHWSYQLEETR  
>Locus\_1218\_Transcript\_2/3\_Confidence\_0.667\_Length\_710|.|"sp|P81928|  
140U\_DROME RPII140-upstream gene protein OS=Drosophila melanogaster  
GN=140up PE=2 SV=2|e=1.01778E-40|from=1|to=531|frame=1|Fragment\_3  
NAKRQMQSGPRTEDP  
>Locus\_1218\_Transcript\_3/3\_Confidence\_0.667\_Length\_710|.|"sp|P81928|  
140U\_DROME RPII140-upstream gene protein OS=Drosophila melanogaster  
GN=140up PE=2 SV=2|e=1.01778E-40|from=1|to=531|frame=1|Fragment\_1  
SPELTSIVQATSFALTGAVYGGFIKSKMAYEDFMSNNQATSFTSMQEAQKQLQNQVTIG

FGKGAFMWGWRLLALFTCSYITITTTVISVYRDRSSIWEYLAAGSLTGALYKFRMGPKGMI  
>Locus\_1218\_Transcript\_3/3\_Confidence\_0.667\_Length\_710|. |sp|P81928|  
140U\_DROME RPII140-upstream gene protein OS=Drosophila melanogaster  
GN=140up PE=2 SV=2|e=1.01778E-40|from=1|to=531|frame=1|Fragment\_2  
IAGTISLTVLYLTGTTVQELRHWSYQLEETRN  
>Locus\_1218\_Transcript\_3/3\_Confidence\_0.667\_Length\_710|. |sp|P81928|  
140U\_DROME RPII140-upstream gene protein OS=Drosophila melanogaster  
GN=140up PE=2 SV=2|e=1.01778E-40|from=1|to=531|frame=1|Fragment\_3  
NAKRQMQSGPRTEDP  
>Locus\_10462\_Transcript\_1/1\_Confidence\_1.000\_Length\_302|. |sp|P81928|  
140U\_DROME RPII140-upstream gene protein OS=Drosophila melanogaster  
GN=140up PE=2 SV=2|e=5.28198E-13|from=43|to=300|frame=1|Fragment\_1  
LIAGVMPI  
>Locus\_10462\_Transcript\_1/1\_Confidence\_1.000\_Length\_302|. |sp|P81928|  
140U\_DROME RPII140-upstream gene protein OS=Drosophila melanogaster  
GN=140up PE=2 SV=2|e=5.28198E-13|from=43|to=300|frame=1|Fragment\_2  
TDHDILPDTKTTAEMIKKKLESETPRDRLYKMFMSDEFGIISPELTSIVQATSFGALTGA  
VYGGFIKSKMAYEDFMSN  
>Locus\_29945\_Transcript\_1/1\_Confidence\_1.000\_Length\_281|. |sp|P81928|  
140U\_DROME RPII140-upstream gene protein OS=Drosophila melanogaster  
GN=140up PE=2 SV=2|e=5.19659E-13|from=22|to=279|frame=1|Fragment\_1  
LIAGVMPI  
>Locus\_29945\_Transcript\_1/1\_Confidence\_1.000\_Length\_281|. |sp|P81928|  
140U\_DROME RPII140-upstream gene protein OS=Drosophila melanogaster  
GN=140up PE=2 SV=2|e=5.19659E-13|from=22|to=279|frame=1|Fragment\_2  
TDHDILPDTKTTAEMIKKKLESETPKDRLYKMFMSDEFGIISPELTSIVQATSFGALTGA  
VYGGFIKSKMAYEDFMSN  
>Locus\_21596\_Transcript\_1/1\_Confidence\_1.000\_Length\_243|UNIGENE  
REPRESENTATIVE TRANSCRIPT|sp|P91645|CAC1A\_DROME Voltage-dependent  
calcium channel type A subunit alpha-1 OS=Drosophila melanogaster  
GN=cac PE=2 SV=3|e=1.23408E-25|from=1|to=243|frame=1|Fragment\_1  
LVISLLNSMR  
>Locus\_21596\_Transcript\_1/1\_Confidence\_1.000\_Length\_243|UNIGENE  
REPRESENTATIVE TRANSCRIPT|sp|P91645|CAC1A\_DROME Voltage-dependent  
calcium channel type A subunit alpha-1 OS=Drosophila melanogaster  
GN=cac PE=2 SV=3|e=1.23408E-25|from=1|to=243|frame=1|Fragment\_2  
GMQLFGGQFNFPDGTATNFNTFPIALLTVFQILTGEDWNEVMYQGIASQGG  
>Locus\_4079\_Transcript\_1/2\_Confidence\_0.750\_Length\_3495|UNIGENE  
REPRESENTATIVE TRANSCRIPT|sp|P91682|SMO\_DROME Protein smoothed  
OS=Drosophila melanogaster GN=smo PE=1 SV=1|e=0|from=385|to=3219|  
frame=-1|Fragment\_1  
ENSEKILEAINDSINYRIQNLKKGKDEKPFSSRDALSVCVRPGKCEKLEY  
>Locus\_4079\_Transcript\_1/2\_Confidence\_0.750\_Length\_3495|UNIGENE  
REPRESENTATIVE TRANSCRIPT|sp|P91682|SMO\_DROME Protein smoothed  
OS=Drosophila melanogaster GN=smo PE=1 SV=1|e=0|from=385|to=3219|  
frame=-1|Fragment\_2  
NMCFNKIPYSYTSLDLTY  
>Locus\_4079\_Transcript\_1/2\_Confidence\_0.750\_Length\_3495|UNIGENE  
REPRESENTATIVE TRANSCRIPT|sp|P91682|SMO\_DROME Protein smoothed  
OS=Drosophila melanogaster GN=smo PE=1 SV=1|e=0|from=385|to=3219|  
frame=-1|Fragment\_3  
QTLIHIPKCWAVIQPFLCATYFPKCENISNTEIVYIPSLEMCKIIMEPCRLVYNTTFFPD  
FLKCNPSLYSSSCKNDVRDMKFNITGQCLPPLVKTDSEIKHFYDGDGGLQCNDALYTVN  
EHQQIHKLIWAGATICLLCNMFTILTFLIDWQNANKYPALVIFYINCWFLISCLGFIAQF

IPGAREDIVCRKDGTLRQSEPSAGENLSC

>Locus\_4079\_Transcript\_1/2\_Confidence\_0.750\_Length\_3495|UNIGENE REPRESENTATIVE TRANSCRIPT|sp|P91682|SMO\_DROME Protein smoothed OS=Drosophila melanogaster GN=smo PE=1 SV=1|e=0|from=385|to=3219|frame=-1|Fragment\_4

VYYSLIAAMVWFVIFTYVWHISFQAIGKIQERIDKKGAYFHLIACSLPLVLTITTMALSE  
IDGNSIVGICFLGYKNHSIRAGLLLGPICGVIIIVGGYFLSRGFLTTLITLKITSKDIISAR  
ASKKIRETIARMGLCCLLMVLIIGTF SCHINEFQSTQAWASDLKNYIICLIMYKYDTSN  
SAESCRLTSRPSVALLQLHLLCFATGIIMSSWVTKSSAEAWKRYIRKKFDCEIEEPLK  
LQKHKVIAQAFKRKEFHADAGRLSITFHNTHTDPLGLNF

>Locus\_4079\_Transcript\_1/2\_Confidence\_0.750\_Length\_3495|UNIGENE REPRESENTATIVE TRANSCRIPT|sp|P91682|SMO\_DROME Protein smoothed OS=Drosophila melanogaster GN=smo PE=1 SV=1|e=0|from=385|to=3219|frame=-1|Fragment\_5

ELNSVASHDFSSTWANLPRFVNRRCALTCGPNTGSASSSHCGNHRNSLDSEISFSVRH  
VSVESRRNSLDSQISFKIAEMKTKVASRRCSKGR

>Locus\_4079\_Transcript\_1/2\_Confidence\_0.750\_Length\_3495|UNIGENE REPRESENTATIVE TRANSCRIPT|sp|P91682|SMO\_DROME Protein smoothed OS=Drosophila melanogaster GN=smo PE=1 SV=1|e=0|from=385|to=3219|frame=-1|Fragment\_6

IRKRDF

>Locus\_4079\_Transcript\_1/2\_Confidence\_0.750\_Length\_3495|UNIGENE REPRESENTATIVE TRANSCRIPT|sp|P91682|SMO\_DROME Protein smoothed OS=Drosophila melanogaster GN=smo PE=1 SV=1|e=0|from=385|to=3219|frame=-1|Fragment\_7

STSLETQ

>Locus\_4079\_Transcript\_1/2\_Confidence\_0.750\_Length\_3495|UNIGENE REPRESENTATIVE TRANSCRIPT|sp|P91682|SMO\_DROME Protein smoothed OS=Drosophila melanogaster GN=smo PE=1 SV=1|e=0|from=385|to=3219|frame=-1|Fragment\_8

IGAQIIKVLNADHNSRPSLKRRTGNAGLSDNINSL

>Locus\_4079\_Transcript\_1/2\_Confidence\_0.750\_Length\_3495|UNIGENE REPRESENTATIVE TRANSCRIPT|sp|P91682|SMO\_DROME Protein smoothed OS=Drosophila melanogaster GN=smo PE=1 SV=1|e=0|from=385|to=3219|frame=-1|Fragment\_9

CDGKLVLPFLHNQGLTTSDDDECHSVTSLTIKDSRLDVVLRKSHISSDDNLNQVSINIEE  
YHSSDDKCSNNYEKSDPANKECIMSSSHKDRKEKEGKITKSTSKY

>Locus\_4079\_Transcript\_1/2\_Confidence\_0.750\_Length\_3495|UNIGENE REPRESENTATIVE TRANSCRIPT|sp|P91682|SMO\_DROME Protein smoothed OS=Drosophila melanogaster GN=smo PE=1 SV=1|e=0|from=385|to=3219|frame=-1|Fragment\_10

NDKVSRSNKPIESESGADHDLCESRAP

>Locus\_4079\_Transcript\_1/2\_Confidence\_0.750\_Length\_3495|UNIGENE REPRESENTATIVE TRANSCRIPT|sp|P91682|SMO\_DROME Protein smoothed OS=Drosophila melanogaster GN=smo PE=1 SV=1|e=0|from=385|to=3219|frame=-1|Fragment\_11

SYCSELSPLAVQSSFSGISVVGKTNRSNSKLSCDVGIQANAHEI

>Locus\_4079\_Transcript\_2/2\_Confidence\_0.750\_Length\_3495|. |sp|P91682|SMO\_DROME Protein smoothed OS=Drosophila melanogaster GN=smo PE=1 SV=1|e=0|from=385|to=3219|frame=-1|Fragment\_1

ENSEKILEAINDSINYRIQNLKKGKDEKPFSSRDALSVCVRPGKCEKLEY

>Locus\_4079\_Transcript\_2/2\_Confidence\_0.750\_Length\_3495|. |sp|P91682|SMO\_DROME Protein smoothed OS=Drosophila melanogaster GN=smo PE=1 SV=1|e=0|from=385|to=3219|frame=-1|Fragment\_2

NMCFNAKIPYSYTSLDLTY

>Locus\_4079\_Transcript\_2/2\_Confidence\_0.750\_Length\_3495|. |sp|P91682|  
SMO\_DROME Protein smoothed OS=Drosophila melanogaster GN=smo PE=1  
SV=1|e=0|from=385|to=3219|frame=-1|Fragment\_3  
QTLIHIPKCWAVIQPFLCATYFPKCENISNTEIVYIPSLEMCKIIMEPCRLVYNTTFFPD  
FLKCNPSLYSSSCKNDVRDMKFNITGQCLPPLVKTDSIKHFYDGDGCGLQCNDALYTVN  
EHQQIHKLIAWGATICLLCNMFTILTFLIDWQNANKYPALVIFYINCWFLISCLGFIAQF  
IPGAREDIVCRKDGTLRQSEPSAGENLSC

>Locus\_4079\_Transcript\_2/2\_Confidence\_0.750\_Length\_3495|. |sp|P91682|  
SMO\_DROME Protein smoothed OS=Drosophila melanogaster GN=smo PE=1  
SV=1|e=0|from=385|to=3219|frame=-1|Fragment\_4  
VYYSLIAAMVWFVIFTYVWHISFQAIGKIQERIDKKGAYFHLIACSLPLVLTITTMALSE  
IDGNSIVGICFLGYKNHSIRAGLLLGPIGVIIIVGGYFLSRGFLTLITLKITSKDIISAR  
ASKKIRETIARMGLCCLLMVLIIGTFSCHINEFQSTQAWASDLKNYIICLIMYKYDTSN  
SAESCRLTSRPSVALLQLHLLCFATGIIMSSWVWTKSSAEAWKRYIRKKFDCEIEEPLK  
LQKHKVIQAFAKRKEFHDAGRLSITFHNTHTDPLGLNF

>Locus\_4079\_Transcript\_2/2\_Confidence\_0.750\_Length\_3495|. |sp|P91682|  
SMO\_DROME Protein smoothed OS=Drosophila melanogaster GN=smo PE=1  
SV=1|e=0|from=385|to=3219|frame=-1|Fragment\_5  
ELNSVASHDFSSTWANNLPRFVNRRCALTCGPNTGSASSSHCGNHRNSLDSEISFSVRH  
VSVESRRNSLDSQISFKIAEMKTKVASRRCSKGR

>Locus\_4079\_Transcript\_2/2\_Confidence\_0.750\_Length\_3495|. |sp|P91682|  
SMO\_DROME Protein smoothed OS=Drosophila melanogaster GN=smo PE=1  
SV=1|e=0|from=385|to=3219|frame=-1|Fragment\_6  
IRKRDF

>Locus\_4079\_Transcript\_2/2\_Confidence\_0.750\_Length\_3495|. |sp|P91682|  
SMO\_DROME Protein smoothed OS=Drosophila melanogaster GN=smo PE=1  
SV=1|e=0|from=385|to=3219|frame=-1|Fragment\_7  
STSLETQ

>Locus\_4079\_Transcript\_2/2\_Confidence\_0.750\_Length\_3495|. |sp|P91682|  
SMO\_DROME Protein smoothed OS=Drosophila melanogaster GN=smo PE=1  
SV=1|e=0|from=385|to=3219|frame=-1|Fragment\_8  
IGAQIIKVLNADHNSRPSLKRRTGNAGLSDSNINSL

>Locus\_4079\_Transcript\_2/2\_Confidence\_0.750\_Length\_3495|. |sp|P91682|  
SMO\_DROME Protein smoothed OS=Drosophila melanogaster GN=smo PE=1  
SV=1|e=0|from=385|to=3219|frame=-1|Fragment\_9  
CDGKLVLPFLHNQGLTTSDECHSVTSLTIKDSRLDVVLRKSHISSDDNLNQVSINIEE  
YHSSDDKCSNNYEKSDPANKECIMSSSHKDRKEKEGKITKSTSKY

>Locus\_4079\_Transcript\_2/2\_Confidence\_0.750\_Length\_3495|. |sp|P91682|  
SMO\_DROME Protein smoothed OS=Drosophila melanogaster GN=smo PE=1  
SV=1|e=0|from=385|to=3219|frame=-1|Fragment\_10  
NDKVSRSNKPIEESGADHDLCESRAP

>Locus\_4079\_Transcript\_2/2\_Confidence\_0.750\_Length\_3495|. |sp|P91682|  
SMO\_DROME Protein smoothed OS=Drosophila melanogaster GN=smo PE=1  
SV=1|e=0|from=385|to=3219|frame=-1|Fragment\_11  
SYCSELSPLAVQSSFSGISVGTNSRNSKLSCDVGIQANAHEI

>Locus\_1925\_Transcript\_1/5\_Confidence\_0.600\_Length\_895|UNIGENE  
REPRESENTATIVE TRANSCRIPT|sp|P92029|DNJ60\_DROME DnaJ-like protein 60  
OS=Drosophila melanogaster GN=DnaJ-60 PE=2 SV=1|e=1.64937E-23|  
from=4|to=555|frame=1|Fragment\_1  
SHYDVLKLRKNCSTREIKASFIELSKKFPDVNSG

>Locus\_1925\_Transcript\_1/5\_Confidence\_0.600\_Length\_895|UNIGENE  
REPRESENTATIVE TRANSCRIPT|sp|P92029|DNJ60\_DROME DnaJ-like protein 60  
OS=Drosophila melanogaster GN=DnaJ-60 PE=2 SV=1|e=1.64937E-23|

from=4|to=555|frame=1|Fragment\_2  
KRSHIDFLQISEAYKILSRPVTRRKYDAELAIAKLRETTWPRRDMPETWSDSTIWNKSKNK  
TSQKPKPYGIPGVKRLPNAWIVAMCLTTAGIALAAEVFLISTASRHTRQKITMQSMANE  
ET  
>Locus\_1925\_Transcript\_1/5\_Confidence\_0.600\_Length\_895|UNIGENE  
REPRESENTATIVE TRANSCRIPT|sp|P92029|DNJ60\_DROME DnaJ-like protein 60  
OS=Drosophila melanogaster GN=DnaJ-60 PE=2 SV=1|e=1.64937E-23|  
from=4|to=555|frame=1|Fragment\_3  
LATVQAEARRFGNEIQLERLIARAKLS  
>Locus\_1925\_Transcript\_5/5\_Confidence\_0.500\_Length\_895|. |sp|P92029|  
DNJ60\_DROME DnaJ-like protein 60 OS=Drosophila melanogaster  
GN=DnaJ-60 PE=2 SV=1|e=1.64937E-23|from=4|to=555|frame=1|Fragment\_1  
SHYDVLKLRKNCSTREIKASFIELSKKFHPDVNSG  
>Locus\_1925\_Transcript\_5/5\_Confidence\_0.500\_Length\_895|. |sp|P92029|  
DNJ60\_DROME DnaJ-like protein 60 OS=Drosophila melanogaster  
GN=DnaJ-60 PE=2 SV=1|e=1.64937E-23|from=4|to=555|frame=1|Fragment\_2  
KRSHIDFLQISEAYKILSRPVTRRKYDAELAIAKLRETTWPRRDMPETWSDSTIWNKSKNK  
TSQKPKPYGIPGVKRLPNAWIVAMCLTTAGIALAAEVFLISTASRHTRQKITMQSMANE  
ET  
>Locus\_1925\_Transcript\_5/5\_Confidence\_0.500\_Length\_895|. |sp|P92029|  
DNJ60\_DROME DnaJ-like protein 60 OS=Drosophila melanogaster  
GN=DnaJ-60 PE=2 SV=1|e=1.64937E-23|from=4|to=555|frame=1|Fragment\_3  
LATVQAEARRFGNEIQLERLIARAKLS  
>Locus\_1925\_Transcript\_4/5\_Confidence\_0.500\_Length\_796|. |sp|P92029|  
DNJ60\_DROME DnaJ-like protein 60 OS=Drosophila melanogaster  
GN=DnaJ-60 PE=2 SV=1|e=1.37322E-23|from=4|to=555|frame=1|Fragment\_1  
SHYDVLKLRKNCSTREIKASFIELSKKFHPDVNSG  
>Locus\_1925\_Transcript\_4/5\_Confidence\_0.500\_Length\_796|. |sp|P92029|  
DNJ60\_DROME DnaJ-like protein 60 OS=Drosophila melanogaster  
GN=DnaJ-60 PE=2 SV=1|e=1.37322E-23|from=4|to=555|frame=1|Fragment\_2  
KRSHIDFLQISEAYKILSRPVTRRKYDAELAIAKLRETTWPRRDMPETWSDSTIWNKSKNK  
TSQKPKPYGIPGVKRLPNAWIVAMCLTTAGIALAAEVFLISTASRHTRQKITMQSMANE  
ET  
>Locus\_539\_Transcript\_2/3\_Confidence\_0.714\_Length\_5667|UNIGENE  
REPRESENTATIVE TRANSCRIPT|sp|P98163|YL\_DROME Putative vitellogenin  
receptor OS=Drosophila melanogaster GN=yl PE=1 SV=2|e=0|from=436|  
to=5412|frame=-1|Fragment\_1  
CLTSEYTCGDGECISKTRICDGIKDCKDSDSDEHHCCEMYRCEEPDWYRCAD  
>Locus\_539\_Transcript\_2/3\_Confidence\_0.714\_Length\_5667|UNIGENE  
REPRESENTATIVE TRANSCRIPT|sp|P98163|YL\_DROME Putative vitellogenin  
receptor OS=Drosophila melanogaster GN=yl PE=1 SV=2|e=0|from=436|  
to=5412|frame=-1|Fragment\_2  
GECISSFRCDKSMDCPSGSDEQNC  
>Locus\_539\_Transcript\_2/3\_Confidence\_0.714\_Length\_5667|UNIGENE  
REPRESENTATIVE TRANSCRIPT|sp|P98163|YL\_DROME Putative vitellogenin  
receptor OS=Drosophila melanogaster GN=yl PE=1 SV=2|e=0|from=436|  
to=5412|frame=-1|Fragment\_3  
DFVYTPPSTN  
>Locus\_539\_Transcript\_2/3\_Confidence\_0.714\_Length\_5667|UNIGENE  
REPRESENTATIVE TRANSCRIPT|sp|P98163|YL\_DROME Putative vitellogenin  
receptor OS=Drosophila melanogaster GN=yl PE=1 SV=2|e=0|from=436|  
to=5412|frame=-1|Fragment\_4  
HSCEHNEWMCA  
>Locus\_539\_Transcript\_2/3\_Confidence\_0.714\_Length\_5667|UNIGENE

REPRESENTATIVE TRANSCRIPT|sp|P98163|YL\_DROME Putative vitellogenin receptor OS=Drosophila melanogaster GN=yl PE=1 SV=2|e=0|from=436|to=5412|frame=-1|Fragment\_5  
DRMCIPLEFVCNGDFDCMDKSDEDMGCKDQHAC  
>Locus\_539\_Transcript\_2/3\_Confidence\_0.714\_Length\_5667|UNIGENE  
REPRESENTATIVE TRANSCRIPT|sp|P98163|YL\_DROME Putative vitellogenin receptor OS=Drosophila melanogaster GN=yl PE=1 SV=2|e=0|from=436|to=5412|frame=-1|Fragment\_6  
DGFRCRNGHCIS  
>Locus\_539\_Transcript\_2/3\_Confidence\_0.714\_Length\_5667|UNIGENE  
REPRESENTATIVE TRANSCRIPT|sp|P98163|YL\_DROME Putative vitellogenin receptor OS=Drosophila melanogaster GN=yl PE=1 SV=2|e=0|from=436|to=5412|frame=-1|Fragment\_7  
EDWVCDGAIDCADGSDEIDCDSRPVTFMCILEKDHYPCRDNSSCIPINKVCDNIPHCKDK  
SDEGVGCQQ  
>Locus\_539\_Transcript\_2/3\_Confidence\_0.714\_Length\_5667|UNIGENE  
REPRESENTATIVE TRANSCRIPT|sp|P98163|YL\_DROME Putative vitellogenin receptor OS=Drosophila melanogaster GN=yl PE=1 SV=2|e=0|from=436|to=5412|frame=-1|Fragment\_8  
DCTSLSCA  
>Locus\_539\_Transcript\_2/3\_Confidence\_0.714\_Length\_5667|UNIGENE  
REPRESENTATIVE TRANSCRIPT|sp|P98163|YL\_DROME Putative vitellogenin receptor OS=Drosophila melanogaster GN=yl PE=1 SV=2|e=0|from=436|to=5412|frame=-1|Fragment\_9  
KHCVKTP  
>Locus\_539\_Transcript\_2/3\_Confidence\_0.714\_Length\_5667|UNIGENE  
REPRESENTATIVE TRANSCRIPT|sp|P98163|YL\_DROME Putative vitellogenin receptor OS=Drosophila melanogaster GN=yl PE=1 SV=2|e=0|from=436|to=5412|frame=-1|Fragment\_10  
EGPRCVCPSGFHNPLNSDFSHMHKNWQYNNNDNCTDINECAIHG  
>Locus\_539\_Transcript\_2/3\_Confidence\_0.714\_Length\_5667|UNIGENE  
REPRESENTATIVE TRANSCRIPT|sp|P98163|YL\_DROME Putative vitellogenin receptor OS=Drosophila melanogaster GN=yl PE=1 SV=2|e=0|from=436|to=5412|frame=-1|Fragment\_11  
MCSQRCENTIGSYKCLCDMKYTLSSDKKSK  
>Locus\_539\_Transcript\_2/3\_Confidence\_0.714\_Length\_5667|UNIGENE  
REPRESENTATIVE TRANSCRIPT|sp|P98163|YL\_DROME Putative vitellogenin receptor OS=Drosophila melanogaster GN=yl PE=1 SV=2|e=0|from=436|to=5412|frame=-1|Fragment\_12  
VNGG  
>Locus\_539\_Transcript\_2/3\_Confidence\_0.714\_Length\_5667|UNIGENE  
REPRESENTATIVE TRANSCRIPT|sp|P98163|YL\_DROME Putative vitellogenin receptor OS=Drosophila melanogaster GN=yl PE=1 SV=2|e=0|from=436|to=5412|frame=-1|Fragment\_13  
EALLLFSSRSNIRGLYLES  
>Locus\_539\_Transcript\_2/3\_Confidence\_0.714\_Length\_5667|UNIGENE  
REPRESENTATIVE TRANSCRIPT|sp|P98163|YL\_DROME Putative vitellogenin receptor OS=Drosophila melanogaster GN=yl PE=1 SV=2|e=0|from=436|to=5412|frame=-1|Fragment\_14  
KILFQVIKNQRQIIGVEYDGNHVYWTDVHLGTESILRSLEDGSQMEVLLTSGLSAPEDLA  
LDWLTGNIYFTDAELMHIGVCSNDGKHCTIIVNENIHKPRAIALYPGRGQMFWSWDGNDP  
QIATSSMDGSSPKLFVSTNLHWPNGISIDIPNKRLYWVDAKLQTIIESINLDGTDRRIVLK  
GVTKHPYAI AIFEDQIYWSWDSKSIQSCNKFTCKNRVTVAKESKEYIYGIHIYHSALQP  
KHDHPCMKSSCSHLCLIKAH

>Locus\_539\_Transcript\_2/3\_Confidence\_0.714\_Length\_5667|UNIGENE  
REPRESENTATIVE TRANSCRIPT|sp|P98163|YL\_DROME Putative vitellogenin  
receptor OS=Drosophila melanogaster GN=yl PE=1 SV=2|e=0|from=436|  
to=5412|frame=-1|Fragment\_15  
EYSCACPEGKELSADKTSCRETQRQSELIIGAGNLMVSLMHQKLGRHEL

>Locus\_539\_Transcript\_2/3\_Confidence\_0.714\_Length\_5667|UNIGENE  
REPRESENTATIVE TRANSCRIPT|sp|P98163|YL\_DROME Putative vitellogenin  
receptor OS=Drosophila melanogaster GN=yl PE=1 SV=2|e=0|from=436|  
to=5412|frame=-1|Fragment\_16  
HGVPMKINMDVLTYNLSNGEIIIVADNNKFKFIYTVDMYTTKSSRLTDIKSGEVEAMHFDNL  
ANLFWIDSVQQTIEVLHLDTGVKGFILHGLGDQVPVGFVFAIVPSHGIMFVAFRSHDHTHI  
DRMLLDGSGIRTHVVEDGLGRWGKISMVYDHLQRVFWAVEETGRIESSSVDGDDRHGFR  
HTKDKPIAIAAILGNLFWTTAGNRRLYWADKHNLGNGFNKKLTIIDIER

>Locus\_539\_Transcript\_2/3\_Confidence\_0.714\_Length\_5667|UNIGENE  
REPRESENTATIVE TRANSCRIPT|sp|P98163|YL\_DROME Putative vitellogenin  
receptor OS=Drosophila melanogaster GN=yl PE=1 SV=2|e=0|from=436|  
to=5412|frame=-1|Fragment\_17  
NLKSVPLTAITPRTISNHLCIHENGCSHCIPMMQKISCHCPVGLSLVPPYNSCETI  
IHCTGEQFRCSDTNKCIPMILRCNGNKDCDFGEDESCE

>Locus\_539\_Transcript\_2/3\_Confidence\_0.714\_Length\_5667|UNIGENE  
REPRESENTATIVE TRANSCRIPT|sp|P98163|YL\_DROME Putative vitellogenin  
receptor OS=Drosophila melanogaster GN=yl PE=1 SV=2|e=0|from=436|  
to=5412|frame=-1|Fragment\_18  
RYKDRQSCAVNEFQCNDG

>Locus\_539\_Transcript\_2/3\_Confidence\_0.714\_Length\_5667|UNIGENE  
REPRESENTATIVE TRANSCRIPT|sp|P98163|YL\_DROME Putative vitellogenin  
receptor OS=Drosophila melanogaster GN=yl PE=1 SV=2|e=0|from=436|  
to=5412|frame=-1|Fragment\_19  
ICIEYHYKCDKHFDCPKSDEENCENYVSSSKCTHAQFECANGQCIDNRLLCDVLPDCLD  
GSDEKMC DHVT

>Locus\_539\_Transcript\_2/3\_Confidence\_0.714\_Length\_5667|UNIGENE  
REPRESENTATIVE TRANSCRIPT|sp|P98163|YL\_DROME Putative vitellogenin  
receptor OS=Drosophila melanogaster GN=yl PE=1 SV=2|e=0|from=436|  
to=5412|frame=-1|Fragment\_20  
CESNMFQCQSGSCIPSSWECDGEIDCTDASDEHTFCEPNTCKDNQFTCTNGKCIDMDLKC  
DHEDDCGDSSDEIRCPSKEKESTTETDFIDLITCEPTQYTCEES

>Locus\_539\_Transcript\_2/3\_Confidence\_0.714\_Length\_5667|UNIGENE  
REPRESENTATIVE TRANSCRIPT|sp|P98163|YL\_DROME Putative vitellogenin  
receptor OS=Drosophila melanogaster GN=yl PE=1 SV=2|e=0|from=436|  
to=5412|frame=-1|Fragment\_21  
GACLPEIARCNGTAECKYGEDERECTN

>Locus\_539\_Transcript\_2/3\_Confidence\_0.714\_Length\_5667|UNIGENE  
REPRESENTATIVE TRANSCRIPT|sp|P98163|YL\_DROME Putative vitellogenin  
receptor OS=Drosophila melanogaster GN=yl PE=1 SV=2|e=0|from=436|  
to=5412|frame=-1|Fragment\_22  
CQLDEFTCNSG

>Locus\_539\_Transcript\_2/3\_Confidence\_0.714\_Length\_5667|UNIGENE  
REPRESENTATIVE TRANSCRIPT|sp|P98163|YL\_DROME Putative vitellogenin  
receptor OS=Drosophila melanogaster GN=yl PE=1 SV=2|e=0|from=436|  
to=5412|frame=-1|Fragment\_23  
QCIQRKWVCDKTRDCNDGSDETS

>Locus\_539\_Transcript\_2/3\_Confidence\_0.714\_Length\_5667|UNIGENE  
REPRESENTATIVE TRANSCRIPT|sp|P98163|YL\_DROME Putative vitellogenin  
receptor OS=Drosophila melanogaster GN=yl PE=1 SV=2|e=0|from=436|

to=5412|frame=-1|Fragment\_24  
ESCSAVTTVQPVHSQFLPVCDEDSFRCKSGGCVDLFLVCNGIPDCFDGSDENGACNTSCD  
AIK  
>Locus\_539\_Transcript\_2/3\_Confidence\_0.714\_Length\_5667|UNIGENE  
REPRESENTATIVE TRANSCRIPT|sp|P98163|YL\_DROME Putative vitellogenin  
receptor OS=Drosophila melanogaster GN=y1 PE=1 SV=2|e=0|from=436|  
to=5412|frame=-1|Fragment\_25  
CKHKCSPTPNQPQCSCHEGYHLAGDHLSCDINECKAELQQCGQICTNSAGSFHCSCYPE  
FMLRSDKRSCATGDQMSILYSTSNQIRELTLSPPSVKILFNRNIPKILSLDVSHTSTL  
YFSLHLISQIYRLDIKSGDVQYIMNIGKPMKLAVDWITQNIYFISEDDLHKTLRVCHIEN  
AACAILMKFDKNIAPVELVDPISKYIFYTVTHWVYDNPITILYRANLDGSHVIELRNE  
KLNLIISGIGIDHHQKTVYYCDKHKNTIESVSY  
>Locus\_539\_Transcript\_2/3\_Confidence\_0.714\_Length\_5667|UNIGENE  
REPRESENTATIVE TRANSCRIPT|sp|P98163|YL\_DROME Putative vitellogenin  
receptor OS=Drosophila melanogaster GN=y1 PE=1 SV=2|e=0|from=436|  
to=5412|frame=-1|Fragment\_26  
NGSDHR  
>Locus\_539\_Transcript\_2/3\_Confidence\_0.714\_Length\_5667|UNIGENE  
REPRESENTATIVE TRANSCRIPT|sp|P98163|YL\_DROME Putative vitellogenin  
receptor OS=Drosophila melanogaster GN=y1 PE=1 SV=2|e=0|from=436|  
to=5412|frame=-1|Fragment\_27  
ILVKEQKLLTAPNGLDVFENYAYTLVYGSTRMIKCRFLFGNYACTVIDAYISNADSFKISQ  
YSKQ  
>Locus\_539\_Transcript\_2/3\_Confidence\_0.714\_Length\_5667|UNIGENE  
REPRESENTATIVE TRANSCRIPT|sp|P98163|YL\_DROME Putative vitellogenin  
receptor OS=Drosophila melanogaster GN=y1 PE=1 SV=2|e=0|from=436|  
to=5412|frame=-1|Fragment\_28  
LLHENACENSNCMYLCVPADSGPKCICKNGLMIAPGSSC  
>Locus\_539\_Transcript\_3/3\_Confidence\_0.714\_Length\_5667|. |sp|P98163|  
YL\_DROME Putative vitellogenin receptor OS=Drosophila melanogaster  
GN=y1 PE=1 SV=2|e=0|from=436|to=5412|frame=-1|Fragment\_1  
CLTSEYTCGDGECISKTRICDGIKDKDSDSDEHHCEMYRCEEPDWYRCAD  
>Locus\_539\_Transcript\_3/3\_Confidence\_0.714\_Length\_5667|. |sp|P98163|  
YL\_DROME Putative vitellogenin receptor OS=Drosophila melanogaster  
GN=y1 PE=1 SV=2|e=0|from=436|to=5412|frame=-1|Fragment\_2  
GECISSFRCDKSMDCPSGSDEQNCE  
>Locus\_539\_Transcript\_3/3\_Confidence\_0.714\_Length\_5667|. |sp|P98163|  
YL\_DROME Putative vitellogenin receptor OS=Drosophila melanogaster  
GN=y1 PE=1 SV=2|e=0|from=436|to=5412|frame=-1|Fragment\_3  
DFVYTPPSTN  
>Locus\_539\_Transcript\_3/3\_Confidence\_0.714\_Length\_5667|. |sp|P98163|  
YL\_DROME Putative vitellogenin receptor OS=Drosophila melanogaster  
GN=y1 PE=1 SV=2|e=0|from=436|to=5412|frame=-1|Fragment\_4  
HSCEHNEWMCA  
>Locus\_539\_Transcript\_3/3\_Confidence\_0.714\_Length\_5667|. |sp|P98163|  
YL\_DROME Putative vitellogenin receptor OS=Drosophila melanogaster  
GN=y1 PE=1 SV=2|e=0|from=436|to=5412|frame=-1|Fragment\_5  
DRMICPLEFVCNGDFDCMDKSDMDGCKDQHAC  
>Locus\_539\_Transcript\_3/3\_Confidence\_0.714\_Length\_5667|. |sp|P98163|  
YL\_DROME Putative vitellogenin receptor OS=Drosophila melanogaster  
GN=y1 PE=1 SV=2|e=0|from=436|to=5412|frame=-1|Fragment\_6  
DGFRCRNGHCIS  
>Locus\_539\_Transcript\_3/3\_Confidence\_0.714\_Length\_5667|. |sp|P98163|  
YL\_DROME Putative vitellogenin receptor OS=Drosophila melanogaster

GN=y1 PE=1 SV=2|e=0|from=436|to=5412|frame=-1|Fragment\_7  
EDWVCDGAIDCADGSDEIDCDSRPVTFMCILEKDHYPICRDNSSCIPINKVCDNIPHCKDK  
SDEGVGCQQ  
>Locus\_539\_Transcript\_3/3\_Confidence\_0.714\_Length\_5667|. |sp|P98163|  
YL\_DROME Putative vitellogenin receptor OS=Drosophila melanogaster  
GN=y1 PE=1 SV=2|e=0|from=436|to=5412|frame=-1|Fragment\_8  
DCTSLSCA  
>Locus\_539\_Transcript\_3/3\_Confidence\_0.714\_Length\_5667|. |sp|P98163|  
YL\_DROME Putative vitellogenin receptor OS=Drosophila melanogaster  
GN=y1 PE=1 SV=2|e=0|from=436|to=5412|frame=-1|Fragment\_9  
KHCVKTP  
>Locus\_539\_Transcript\_3/3\_Confidence\_0.714\_Length\_5667|. |sp|P98163|  
YL\_DROME Putative vitellogenin receptor OS=Drosophila melanogaster  
GN=y1 PE=1 SV=2|e=0|from=436|to=5412|frame=-1|Fragment\_10  
EGPRCVCPSGFHNPLNSDFSHMHKNWQYNNNDNCTDINECAIHG  
>Locus\_539\_Transcript\_3/3\_Confidence\_0.714\_Length\_5667|. |sp|P98163|  
YL\_DROME Putative vitellogenin receptor OS=Drosophila melanogaster  
GN=y1 PE=1 SV=2|e=0|from=436|to=5412|frame=-1|Fragment\_11  
MCSQRCENTIGSYKCLCDMKYTLSSDKKSK  
>Locus\_539\_Transcript\_3/3\_Confidence\_0.714\_Length\_5667|. |sp|P98163|  
YL\_DROME Putative vitellogenin receptor OS=Drosophila melanogaster  
GN=y1 PE=1 SV=2|e=0|from=436|to=5412|frame=-1|Fragment\_12  
VNGG  
>Locus\_539\_Transcript\_3/3\_Confidence\_0.714\_Length\_5667|. |sp|P98163|  
YL\_DROME Putative vitellogenin receptor OS=Drosophila melanogaster  
GN=y1 PE=1 SV=2|e=0|from=436|to=5412|frame=-1|Fragment\_13  
EALLLFSSRSNIRGLYLES  
>Locus\_539\_Transcript\_3/3\_Confidence\_0.714\_Length\_5667|. |sp|P98163|  
YL\_DROME Putative vitellogenin receptor OS=Drosophila melanogaster  
GN=y1 PE=1 SV=2|e=0|from=436|to=5412|frame=-1|Fragment\_14  
KILFQVIKNQRQIIGVEYDGNHVYWTDVHLGTESILRSLEDGSQMEVLLTSGLSAPEDLA  
LDWLTGNIYFTDAELMHIGVCSNDGKHCTIIVNENIHKPRAIALYPGRGQMFWSWDGNDP  
QIATSSMDGSSPKLFVSTNLHWPNGISIDIPNKRLYWVDAKLQTIIESINLDGTDRRIVLK  
GVTKHPYAI AIFEDQIYWSWDWSKSIQSCNKFTCKNRVTVAKESKEYIYGIHIYHSALQP  
KHDHPCMKSSCSHLCLIKAH  
>Locus\_539\_Transcript\_3/3\_Confidence\_0.714\_Length\_5667|. |sp|P98163|  
YL\_DROME Putative vitellogenin receptor OS=Drosophila melanogaster  
GN=y1 PE=1 SV=2|e=0|from=436|to=5412|frame=-1|Fragment\_15  
EYSCACPEGKELSADKTSECRETQRQSELIIGAGNLMVSLMHQKLGRHEL  
>Locus\_539\_Transcript\_3/3\_Confidence\_0.714\_Length\_5667|. |sp|P98163|  
YL\_DROME Putative vitellogenin receptor OS=Drosophila melanogaster  
GN=y1 PE=1 SV=2|e=0|from=436|to=5412|frame=-1|Fragment\_16  
HGVPKINMDVLTYNLSNGEIIIVADNNKFIYTVDMYTTKSSRLTDIKSGEVEAMHFDNL  
ANLFWIDSVQQTIEVLHLDTGVKGFILHGLGDQVPVGF AIVPSHGIMFVAFRSHDHTHI  
DRMLLDGSGIRTHVVEDGLGRWGKISMVYDHLQRVFWAVEETGRIESSVDGDDRHGFR  
HTKDKPIAIAILGNLFWTTAGNRRLYWADKHNLGNGFNKLTIDIER  
>Locus\_539\_Transcript\_3/3\_Confidence\_0.714\_Length\_5667|. |sp|P98163|  
YL\_DROME Putative vitellogenin receptor OS=Drosophila melanogaster  
GN=y1 PE=1 SV=2|e=0|from=436|to=5412|frame=-1|Fragment\_17  
NLKSVPLTAITPRTISNHL CIHENGCSHICIPMMQKISCHCPVGLSLVPPYNSCETI  
IHCTGEQFRCSDTNKCIPMIFRCNGNKDCDFGEDESCE  
>Locus\_539\_Transcript\_3/3\_Confidence\_0.714\_Length\_5667|. |sp|P98163|  
YL\_DROME Putative vitellogenin receptor OS=Drosophila melanogaster  
GN=y1 PE=1 SV=2|e=0|from=436|to=5412|frame=-1|Fragment\_18

RYKDRQSCAVNEFQCNDG

>Locus\_539\_Transcript\_3/3\_Confidence\_0.714\_Length\_5667|. |sp|P98163|  
YL\_DROME Putative vitellogenin receptor OS=Drosophila melanogaster  
GN=y1 PE=1 SV=2|e=0|from=436|to=5412|frame=-1|Fragment\_19  
ICIEYHYKCDKHFDCPKSDEENCENYVSSSKCTHAQFECANGQCIDNRLLCDVLPDCLD  
GSDEKMC DHVT

>Locus\_539\_Transcript\_3/3\_Confidence\_0.714\_Length\_5667|. |sp|P98163|  
YL\_DROME Putative vitellogenin receptor OS=Drosophila melanogaster  
GN=y1 PE=1 SV=2|e=0|from=436|to=5412|frame=-1|Fragment\_20  
CESNMFQCQSGSCIPSSWECDGEIDCTDASDEHTFCEPNTCKDNQFTCTNGKCIDMDLKC  
DHEDDCGDSSEIRCPskekesttETDFIDLITCEPTQYTCEES

>Locus\_539\_Transcript\_3/3\_Confidence\_0.714\_Length\_5667|. |sp|P98163|  
YL\_DROME Putative vitellogenin receptor OS=Drosophila melanogaster  
GN=y1 PE=1 SV=2|e=0|from=436|to=5412|frame=-1|Fragment\_21  
GACLPEIARCNGTAECKYGEDERECTN

>Locus\_539\_Transcript\_3/3\_Confidence\_0.714\_Length\_5667|. |sp|P98163|  
YL\_DROME Putative vitellogenin receptor OS=Drosophila melanogaster  
GN=y1 PE=1 SV=2|e=0|from=436|to=5412|frame=-1|Fragment\_22  
CQLDEFTCNSG

>Locus\_539\_Transcript\_3/3\_Confidence\_0.714\_Length\_5667|. |sp|P98163|  
YL\_DROME Putative vitellogenin receptor OS=Drosophila melanogaster  
GN=y1 PE=1 SV=2|e=0|from=436|to=5412|frame=-1|Fragment\_23  
QCIQRKWVCDKTRDCNDGSDETS

>Locus\_539\_Transcript\_3/3\_Confidence\_0.714\_Length\_5667|. |sp|P98163|  
YL\_DROME Putative vitellogenin receptor OS=Drosophila melanogaster  
GN=y1 PE=1 SV=2|e=0|from=436|to=5412|frame=-1|Fragment\_24  
ESCSAVTTVQPVHSQFLPVCDEDSFRCKSGGCVDLFLVCNGIPDCFDGSDENGACNTSCD  
AIK

>Locus\_539\_Transcript\_3/3\_Confidence\_0.714\_Length\_5667|. |sp|P98163|  
YL\_DROME Putative vitellogenin receptor OS=Drosophila melanogaster  
GN=y1 PE=1 SV=2|e=0|from=436|to=5412|frame=-1|Fragment\_25  
CKHKCSPTPNPQCSCHEGYHLAGDHLSCDINECKAELQQCGQICTNSAGSFHCSCYPE  
FMLRSDKRCKATGDQMSILYSTSNQIRELTLSPPSVKILFNRNIPKILSLDVSKHTSTL  
YFSLHLISQIYRLDIKSGDVQYIMNIGKPMKLAVDWITQNIYFISEDLLHKTLRVCHIEN  
AACAILMKFDKNIAPVELVDPISKYIFYTVTHWVYDNPITILYRANLDGSHVIELRNE  
KLNLSIGIGIDHHQKTVYYCDKHKNTIESVSY

>Locus\_539\_Transcript\_3/3\_Confidence\_0.714\_Length\_5667|. |sp|P98163|  
YL\_DROME Putative vitellogenin receptor OS=Drosophila melanogaster  
GN=y1 PE=1 SV=2|e=0|from=436|to=5412|frame=-1|Fragment\_26  
NGSDHR

>Locus\_539\_Transcript\_3/3\_Confidence\_0.714\_Length\_5667|. |sp|P98163|  
YL\_DROME Putative vitellogenin receptor OS=Drosophila melanogaster  
GN=y1 PE=1 SV=2|e=0|from=436|to=5412|frame=-1|Fragment\_27  
ILVKEQKLLTAPNGLDVFENYAYTLVYGSTRMIKCRLLFGNYACTVIDAYISNADSFKISQ  
YSKQ

>Locus\_539\_Transcript\_3/3\_Confidence\_0.714\_Length\_5667|. |sp|P98163|  
YL\_DROME Putative vitellogenin receptor OS=Drosophila melanogaster  
GN=y1 PE=1 SV=2|e=0|from=436|to=5412|frame=-1|Fragment\_28  
LLHENACENSNCMYLCVPADSGPKCICKNGLMIAPGSSC

>Locus\_539\_Transcript\_2/3\_Confidence\_0.714\_Length\_5667|. |sp|P98163|  
YL\_DROME Putative vitellogenin receptor OS=Drosophila melanogaster  
GN=y1 PE=1 SV=2|e=1.95083E-67|from=3505|to=5418|frame=-1|Fragment\_1  
KECLTSEYTCGDGECISKTRICDGIKDKDSDSEHHCEMYRCEEPDWYRCADGECISSSF  
RCDKSMDPCSGSDEQNCEDFVYTPP

>Locus\_539\_Transcript\_2/3\_Confidence\_0.714\_Length\_5667|. |sp|P98163|  
YL\_DROME Putative vitellogenin receptor OS=Drosophila melanogaster  
GN=y1 PE=1 SV=2|e=1.95083E-67|from=3505|to=5418|frame=-1|Fragment\_2  
STNHSCEHNEWMCAD

>Locus\_539\_Transcript\_2/3\_Confidence\_0.714\_Length\_5667|. |sp|P98163|  
YL\_DROME Putative vitellogenin receptor OS=Drosophila melanogaster  
GN=y1 PE=1 SV=2|e=1.95083E-67|from=3505|to=5418|frame=-1|Fragment\_3  
RMCIPLEFVCGDFDCMDKSDMGCKDQHACDGFRCRNG

>Locus\_539\_Transcript\_2/3\_Confidence\_0.714\_Length\_5667|. |sp|P98163|  
YL\_DROME Putative vitellogenin receptor OS=Drosophila melanogaster  
GN=y1 PE=1 SV=2|e=1.95083E-67|from=3505|to=5418|frame=-1|Fragment\_4  
HCISEDWVCDGAIDCADGSDEIDCDSPVTFMCILEKDHY

>Locus\_539\_Transcript\_2/3\_Confidence\_0.714\_Length\_5667|. |sp|P98163|  
YL\_DROME Putative vitellogenin receptor OS=Drosophila melanogaster  
GN=y1 PE=1 SV=2|e=1.95083E-67|from=3505|to=5418|frame=-1|Fragment\_5  
PCR

>Locus\_539\_Transcript\_2/3\_Confidence\_0.714\_Length\_5667|. |sp|P98163|  
YL\_DROME Putative vitellogenin receptor OS=Drosophila melanogaster  
GN=y1 PE=1 SV=2|e=1.95083E-67|from=3505|to=5418|frame=-1|Fragment\_6  
DNSSCIPINKVCDNIPHCKDKSDEGVGCQQDCTSL

>Locus\_539\_Transcript\_2/3\_Confidence\_0.714\_Length\_5667|. |sp|P98163|  
YL\_DROME Putative vitellogenin receptor OS=Drosophila melanogaster  
GN=y1 PE=1 SV=2|e=1.95083E-67|from=3505|to=5418|frame=-1|Fragment\_7  
CAKHCVKTPGPRCVCPSGFHNPLNSDFSHMHKNWQYNNNDNCTDINECAIHGMCSQRCE  
NTIGSYKCLCDMKYTLSSDKKCKVNGGEALLLFSSRSNIRGLYLESKILFQVI

>Locus\_539\_Transcript\_2/3\_Confidence\_0.714\_Length\_5667|. |sp|P98163|  
YL\_DROME Putative vitellogenin receptor OS=Drosophila melanogaster  
GN=y1 PE=1 SV=2|e=1.95083E-67|from=3505|to=5418|frame=-1|Fragment\_8  
KNQRQIIGVEY

>Locus\_539\_Transcript\_2/3\_Confidence\_0.714\_Length\_5667|. |sp|P98163|  
YL\_DROME Putative vitellogenin receptor OS=Drosophila melanogaster  
GN=y1 PE=1 SV=2|e=1.95083E-67|from=3505|to=5418|frame=-1|Fragment\_9  
DGNHVYWTDVHLGTESILRSLEDGSQMEVLLTSGLSAPEDLALDWTGNIYFTDAELMHI  
GVCSNDGKHCTIIVNENIHKPRAI

>Locus\_539\_Transcript\_2/3\_Confidence\_0.714\_Length\_5667|. |sp|P98163|  
YL\_DROME Putative vitellogenin receptor OS=Drosophila melanogaster  
GN=y1 PE=1 SV=2|e=1.95083E-67|from=3505|to=5418|frame=-1|Fragment\_10  
ALYPGRGQMF

>Locus\_539\_Transcript\_2/3\_Confidence\_0.714\_Length\_5667|. |sp|P98163|  
YL\_DROME Putative vitellogenin receptor OS=Drosophila melanogaster  
GN=y1 PE=1 SV=2|e=1.95083E-67|from=3505|to=5418|frame=-1|Fragment\_11  
SDWGD

>Locus\_539\_Transcript\_2/3\_Confidence\_0.714\_Length\_5667|. |sp|P98163|  
YL\_DROME Putative vitellogenin receptor OS=Drosophila melanogaster  
GN=y1 PE=1 SV=2|e=1.95083E-67|from=3505|to=5418|frame=-1|Fragment\_12  
NPQIATSSMDGSSPKLFVSTNLHWPNGISIDIPNKRLYVDAKLQTIIESINL

>Locus\_539\_Transcript\_2/3\_Confidence\_0.714\_Length\_5667|. |sp|P98163|  
YL\_DROME Putative vitellogenin receptor OS=Drosophila melanogaster  
GN=y1 PE=1 SV=2|e=1.95083E-67|from=3505|to=5418|frame=-1|Fragment\_13  
DGTDRR

>Locus\_539\_Transcript\_2/3\_Confidence\_0.714\_Length\_5667|. |sp|P98163|  
YL\_DROME Putative vitellogenin receptor OS=Drosophila melanogaster  
GN=y1 PE=1 SV=2|e=1.95083E-67|from=3505|to=5418|frame=-1|Fragment\_14  
IVLK

>Locus\_539\_Transcript\_2/3\_Confidence\_0.714\_Length\_5667|. |sp|P98163|  
YL\_DROME Putative vitellogenin receptor OS=Drosophila melanogaster  
GN=y1 PE=1 SV=2|e=1.95083E-67|from=3505|to=5418|frame=-1|Fragment\_15  
GVTKHPYAIIFEDQIYWSWDWDSKSIQSC

>Locus\_539\_Transcript\_2/3\_Confidence\_0.714\_Length\_5667|. |sp|P98163|  
YL\_DROME Putative vitellogenin receptor OS=Drosophila melanogaster  
GN=y1 PE=1 SV=2|e=1.95083E-67|from=3505|to=5418|frame=-1|Fragment\_16  
NKFTCKNRVTVAKESKEYIYGIHIYHSALQPKHDHPCMKSSCSHLCLIKAHEYSCACPE  
GKELSADKTSECRETQRQSELIIGAGNLMVSLMHQKLGRLHGHG

>Locus\_539\_Transcript\_3/3\_Confidence\_0.714\_Length\_5667|. |sp|P98163|  
YL\_DROME Putative vitellogenin receptor OS=Drosophila melanogaster  
GN=y1 PE=1 SV=2|e=1.95083E-67|from=3505|to=5418|frame=-1|Fragment\_1  
KECLTSEYTCGDGECISKTRICDGIKDKDSDSEHHCCEMYRCEEPDWYRCADGECISSSF  
RCDKSMDCPSGSDEQNCEDFVYTPP

>Locus\_539\_Transcript\_3/3\_Confidence\_0.714\_Length\_5667|. |sp|P98163|  
YL\_DROME Putative vitellogenin receptor OS=Drosophila melanogaster  
GN=y1 PE=1 SV=2|e=1.95083E-67|from=3505|to=5418|frame=-1|Fragment\_2  
STNHSCEHNEWMCAD

>Locus\_539\_Transcript\_3/3\_Confidence\_0.714\_Length\_5667|. |sp|P98163|  
YL\_DROME Putative vitellogenin receptor OS=Drosophila melanogaster  
GN=y1 PE=1 SV=2|e=1.95083E-67|from=3505|to=5418|frame=-1|Fragment\_3  
RMCIPLEFVCGDFDCMDKSDEDMGCKDQHACDGFRCRNG

>Locus\_539\_Transcript\_3/3\_Confidence\_0.714\_Length\_5667|. |sp|P98163|  
YL\_DROME Putative vitellogenin receptor OS=Drosophila melanogaster  
GN=y1 PE=1 SV=2|e=1.95083E-67|from=3505|to=5418|frame=-1|Fragment\_4  
HCISEDWVCDGAIDCADGSDEIDCSRPTVTFMCILEKDHY

>Locus\_539\_Transcript\_3/3\_Confidence\_0.714\_Length\_5667|. |sp|P98163|  
YL\_DROME Putative vitellogenin receptor OS=Drosophila melanogaster  
GN=y1 PE=1 SV=2|e=1.95083E-67|from=3505|to=5418|frame=-1|Fragment\_5  
PCR

>Locus\_539\_Transcript\_3/3\_Confidence\_0.714\_Length\_5667|. |sp|P98163|  
YL\_DROME Putative vitellogenin receptor OS=Drosophila melanogaster  
GN=y1 PE=1 SV=2|e=1.95083E-67|from=3505|to=5418|frame=-1|Fragment\_6  
DNSSCIPINKVCDNIPHCKDKSDEGVGCQQDCTSL

>Locus\_539\_Transcript\_3/3\_Confidence\_0.714\_Length\_5667|. |sp|P98163|  
YL\_DROME Putative vitellogenin receptor OS=Drosophila melanogaster  
GN=y1 PE=1 SV=2|e=1.95083E-67|from=3505|to=5418|frame=-1|Fragment\_7  
CAKHCVKTPEGPRCVCPSGFHNPLNSDFSHMHKNWQYNNNDNCTDINECAIHGMCSQRCE  
NTIGSYKCLCDMKYTLSSDKKSKVNGGEALLFSSRSNIRGLYLESKILFQVI

>Locus\_539\_Transcript\_3/3\_Confidence\_0.714\_Length\_5667|. |sp|P98163|  
YL\_DROME Putative vitellogenin receptor OS=Drosophila melanogaster  
GN=y1 PE=1 SV=2|e=1.95083E-67|from=3505|to=5418|frame=-1|Fragment\_8  
KNQRQIIGVEY

>Locus\_539\_Transcript\_3/3\_Confidence\_0.714\_Length\_5667|. |sp|P98163|  
YL\_DROME Putative vitellogenin receptor OS=Drosophila melanogaster  
GN=y1 PE=1 SV=2|e=1.95083E-67|from=3505|to=5418|frame=-1|Fragment\_9  
DGNHVYWTDVHLGTESILRSLEDGSQMEVLLTSGLSAPEDLALDWTGNIYFTDAELMHI  
GVCSNDGKHCTIIVNENIHKPRAI

>Locus\_539\_Transcript\_3/3\_Confidence\_0.714\_Length\_5667|. |sp|P98163|  
YL\_DROME Putative vitellogenin receptor OS=Drosophila melanogaster  
GN=y1 PE=1 SV=2|e=1.95083E-67|from=3505|to=5418|frame=-1|Fragment\_10  
ALYPGRGQMF

>Locus\_539\_Transcript\_3/3\_Confidence\_0.714\_Length\_5667|. |sp|P98163|  
YL\_DROME Putative vitellogenin receptor OS=Drosophila melanogaster

GN=y1 PE=1 SV=2|e=1.95083E-67|from=3505|to=5418|frame=-1|Fragment\_11  
SDWGD  
>Locus\_539\_Transcript\_3/3\_Confidence\_0.714\_Length\_5667|. |sp|P98163|  
YL\_DROME Putative vitellogenin receptor OS=Drosophila melanogaster  
GN=y1 PE=1 SV=2|e=1.95083E-67|from=3505|to=5418|frame=-1|Fragment\_12  
NPQIATSSMDGSSPKLFVSTNLHWPNGISIDIPNKRLYWVDAKLQTIIESINL  
>Locus\_539\_Transcript\_3/3\_Confidence\_0.714\_Length\_5667|. |sp|P98163|  
YL\_DROME Putative vitellogenin receptor OS=Drosophila melanogaster  
GN=y1 PE=1 SV=2|e=1.95083E-67|from=3505|to=5418|frame=-1|Fragment\_13  
DGTDRR  
>Locus\_539\_Transcript\_3/3\_Confidence\_0.714\_Length\_5667|. |sp|P98163|  
YL\_DROME Putative vitellogenin receptor OS=Drosophila melanogaster  
GN=y1 PE=1 SV=2|e=1.95083E-67|from=3505|to=5418|frame=-1|Fragment\_14  
IVLK  
>Locus\_539\_Transcript\_3/3\_Confidence\_0.714\_Length\_5667|. |sp|P98163|  
YL\_DROME Putative vitellogenin receptor OS=Drosophila melanogaster  
GN=y1 PE=1 SV=2|e=1.95083E-67|from=3505|to=5418|frame=-1|Fragment\_15  
GVTKHPYAIAIFEDQIYWSDWDSKSIQSC  
>Locus\_539\_Transcript\_3/3\_Confidence\_0.714\_Length\_5667|. |sp|P98163|  
YL\_DROME Putative vitellogenin receptor OS=Drosophila melanogaster  
GN=y1 PE=1 SV=2|e=1.95083E-67|from=3505|to=5418|frame=-1|Fragment\_16  
NKFTCKNRVTVAKESKEYIYGIHIYHSALQPKHDHPCMKSSCSHLCLIKAHEYSCACPE  
GKELSADKTSECRETQRQSELIIGAGNLMVSLMHQKLGRHELHG  
>Locus\_539\_Transcript\_2/3\_Confidence\_0.714\_Length\_5667|. |sp|P98163|  
YL\_DROME Putative vitellogenin receptor OS=Drosophila melanogaster  
GN=y1 PE=1 SV=2|e=2.46781E-62|from=316|to=2391|frame=-1|Fragment\_1  
SSSKCTHAQFECANGQCIDNRLLCDVLPDCLDGSDEKMC DHVTCE  
>Locus\_539\_Transcript\_2/3\_Confidence\_0.714\_Length\_5667|. |sp|P98163|  
YL\_DROME Putative vitellogenin receptor OS=Drosophila melanogaster  
GN=y1 PE=1 SV=2|e=2.46781E-62|from=316|to=2391|frame=-1|Fragment\_2  
SNMFQCQS  
>Locus\_539\_Transcript\_2/3\_Confidence\_0.714\_Length\_5667|. |sp|P98163|  
YL\_DROME Putative vitellogenin receptor OS=Drosophila melanogaster  
GN=y1 PE=1 SV=2|e=2.46781E-62|from=316|to=2391|frame=-1|Fragment\_3  
GSCIPSSWECDEIDCTDASDE  
>Locus\_539\_Transcript\_2/3\_Confidence\_0.714\_Length\_5667|. |sp|P98163|  
YL\_DROME Putative vitellogenin receptor OS=Drosophila melanogaster  
GN=y1 PE=1 SV=2|e=2.46781E-62|from=316|to=2391|frame=-1|Fragment\_4  
HTFCEPNTCKDNQFTCTNGK  
>Locus\_539\_Transcript\_2/3\_Confidence\_0.714\_Length\_5667|. |sp|P98163|  
YL\_DROME Putative vitellogenin receptor OS=Drosophila melanogaster  
GN=y1 PE=1 SV=2|e=2.46781E-62|from=316|to=2391|frame=-1|Fragment\_5  
CIDMDLKCDHEDDCGDSSDEIR  
>Locus\_539\_Transcript\_2/3\_Confidence\_0.714\_Length\_5667|. |sp|P98163|  
YL\_DROME Putative vitellogenin receptor OS=Drosophila melanogaster  
GN=y1 PE=1 SV=2|e=2.46781E-62|from=316|to=2391|frame=-1|Fragment\_6  
CPSKEKESTTETDFIDLITCEPTQYTCEESGACLPEIA  
>Locus\_539\_Transcript\_2/3\_Confidence\_0.714\_Length\_5667|. |sp|P98163|  
YL\_DROME Putative vitellogenin receptor OS=Drosophila melanogaster  
GN=y1 PE=1 SV=2|e=2.46781E-62|from=316|to=2391|frame=-1|Fragment\_7  
RCNGTAECKYGEDERECTNC  
>Locus\_539\_Transcript\_2/3\_Confidence\_0.714\_Length\_5667|. |sp|P98163|  
YL\_DROME Putative vitellogenin receptor OS=Drosophila melanogaster  
GN=y1 PE=1 SV=2|e=2.46781E-62|from=316|to=2391|frame=-1|Fragment\_8

QLDEFTC

>Locus\_539\_Transcript\_2/3\_Confidence\_0.714\_Length\_5667|. |sp|P98163|  
YL\_DROME Putative vitellogenin receptor OS=Drosophila melanogaster  
GN=y1 PE=1 SV=2|e=2.46781E-62|from=316|to=2391|frame=-1|Fragment\_9  
NSGQCIQRKWVCDKTRDCNDGSDETSESCSAVTTVQPVHSQFLPVCDEDSFRCKSGGCVD  
FLFVCNGIPDCFDGSDENGACNTSCDAIKCK

>Locus\_539\_Transcript\_2/3\_Confidence\_0.714\_Length\_5667|. |sp|P98163|  
YL\_DROME Putative vitellogenin receptor OS=Drosophila melanogaster  
GN=y1 PE=1 SV=2|e=2.46781E-62|from=316|to=2391|frame=-1|Fragment\_10  
HKCSPTP

>Locus\_539\_Transcript\_2/3\_Confidence\_0.714\_Length\_5667|. |sp|P98163|  
YL\_DROME Putative vitellogenin receptor OS=Drosophila melanogaster  
GN=y1 PE=1 SV=2|e=2.46781E-62|from=316|to=2391|frame=-1|Fragment\_11  
NGPQCSCHEGYHLAGDHLSTDINECKAELQCGQICTNSAGSFHCSCYPEFMLRSDKRS  
CKAT

>Locus\_539\_Transcript\_2/3\_Confidence\_0.714\_Length\_5667|. |sp|P98163|  
YL\_DROME Putative vitellogenin receptor OS=Drosophila melanogaster  
GN=y1 PE=1 SV=2|e=2.46781E-62|from=316|to=2391|frame=-1|Fragment\_12  
GDQMSILYSTSNQIRELTLSPPSVKILFNRNIPKILSLDVSHTSTLYFSLHL

>Locus\_539\_Transcript\_2/3\_Confidence\_0.714\_Length\_5667|. |sp|P98163|  
YL\_DROME Putative vitellogenin receptor OS=Drosophila melanogaster  
GN=y1 PE=1 SV=2|e=2.46781E-62|from=316|to=2391|frame=-1|Fragment\_13  
ISQIYRLDIKSGDVQYIMNIG

>Locus\_539\_Transcript\_2/3\_Confidence\_0.714\_Length\_5667|. |sp|P98163|  
YL\_DROME Putative vitellogenin receptor OS=Drosophila melanogaster  
GN=y1 PE=1 SV=2|e=2.46781E-62|from=316|to=2391|frame=-1|Fragment\_14  
KPMKLAVDWITQNIYFISEDHLKTLRVCHIENAACAILMKFDKNIAPVELVDPISKYI  
FYTVTHWVVDNPITILYRANLDGSHVIELRNEKLNLSGIGIDHHQKTVYYCDKHKNTI  
ESVSYNGSDHRILVKEQKLLTAPNGLDVFENYAYTLVYGSTRMIKRLFGNYACTVIDAY  
ISNADSFKISQYSKQLLHENACENSNCMYLCV

>Locus\_539\_Transcript\_2/3\_Confidence\_0.714\_Length\_5667|. |sp|P98163|  
YL\_DROME Putative vitellogenin receptor OS=Drosophila melanogaster  
GN=y1 PE=1 SV=2|e=2.46781E-62|from=316|to=2391|frame=-1|Fragment\_15  
PADSGPKCICKNGLMIAPGSSCVDDMD

>Locus\_539\_Transcript\_2/3\_Confidence\_0.714\_Length\_5667|. |sp|P98163|  
YL\_DROME Putative vitellogenin receptor OS=Drosophila melanogaster  
GN=y1 PE=1 SV=2|e=2.46781E-62|from=316|to=2391|frame=-1|Fragment\_16  
DHPQFGTMASNEQSTSVAVPIFLSLLLFAGVAGSI

>Locus\_539\_Transcript\_3/3\_Confidence\_0.714\_Length\_5667|. |sp|P98163|  
YL\_DROME Putative vitellogenin receptor OS=Drosophila melanogaster  
GN=y1 PE=1 SV=2|e=2.46781E-62|from=316|to=2391|frame=-1|Fragment\_1  
SSSKCTHAQFECANGQCIDNRLLCDVLPDCLDGSDEKMC DHVTCE

>Locus\_539\_Transcript\_3/3\_Confidence\_0.714\_Length\_5667|. |sp|P98163|  
YL\_DROME Putative vitellogenin receptor OS=Drosophila melanogaster  
GN=y1 PE=1 SV=2|e=2.46781E-62|from=316|to=2391|frame=-1|Fragment\_2  
SNMFQCQS

>Locus\_539\_Transcript\_3/3\_Confidence\_0.714\_Length\_5667|. |sp|P98163|  
YL\_DROME Putative vitellogenin receptor OS=Drosophila melanogaster  
GN=y1 PE=1 SV=2|e=2.46781E-62|from=316|to=2391|frame=-1|Fragment\_3  
GSCIPSSWECDEIDCTDASDE

>Locus\_539\_Transcript\_3/3\_Confidence\_0.714\_Length\_5667|. |sp|P98163|  
YL\_DROME Putative vitellogenin receptor OS=Drosophila melanogaster  
GN=y1 PE=1 SV=2|e=2.46781E-62|from=316|to=2391|frame=-1|Fragment\_4  
HTFCEPNTCKDNQFTCTNGK

>Locus\_539\_Transcript\_3/3\_Confidence\_0.714\_Length\_5667|. |sp|P98163|  
YL\_DROME Putative vitellogenin receptor OS=Drosophila melanogaster  
GN=y1 PE=1 SV=2|e=2.46781E-62|from=316|to=2391|frame=-1|Fragment\_5  
CIDMDLKCDHEDDCGDSSDEIR

>Locus\_539\_Transcript\_3/3\_Confidence\_0.714\_Length\_5667|. |sp|P98163|  
YL\_DROME Putative vitellogenin receptor OS=Drosophila melanogaster  
GN=y1 PE=1 SV=2|e=2.46781E-62|from=316|to=2391|frame=-1|Fragment\_6  
CPSKEKETTETDFIDLITCEPTQYTCEESGACLPEIA

>Locus\_539\_Transcript\_3/3\_Confidence\_0.714\_Length\_5667|. |sp|P98163|  
YL\_DROME Putative vitellogenin receptor OS=Drosophila melanogaster  
GN=y1 PE=1 SV=2|e=2.46781E-62|from=316|to=2391|frame=-1|Fragment\_7  
RCNGTAECKYGEDERECTNC

>Locus\_539\_Transcript\_3/3\_Confidence\_0.714\_Length\_5667|. |sp|P98163|  
YL\_DROME Putative vitellogenin receptor OS=Drosophila melanogaster  
GN=y1 PE=1 SV=2|e=2.46781E-62|from=316|to=2391|frame=-1|Fragment\_8  
QLDEFTC

>Locus\_539\_Transcript\_3/3\_Confidence\_0.714\_Length\_5667|. |sp|P98163|  
YL\_DROME Putative vitellogenin receptor OS=Drosophila melanogaster  
GN=y1 PE=1 SV=2|e=2.46781E-62|from=316|to=2391|frame=-1|Fragment\_9  
NSGQCIQRKWVCDKTRDCNDGSDTSESCSAVTTVQPVHSQFLPVCDEDSFRCKSGGCVD  
FLFVCNGIPDCFDGSDENGACNTSCDAIKCK

>Locus\_539\_Transcript\_3/3\_Confidence\_0.714\_Length\_5667|. |sp|P98163|  
YL\_DROME Putative vitellogenin receptor OS=Drosophila melanogaster  
GN=y1 PE=1 SV=2|e=2.46781E-62|from=316|to=2391|frame=-1|Fragment\_10  
HKCSPTP

>Locus\_539\_Transcript\_3/3\_Confidence\_0.714\_Length\_5667|. |sp|P98163|  
YL\_DROME Putative vitellogenin receptor OS=Drosophila melanogaster  
GN=y1 PE=1 SV=2|e=2.46781E-62|from=316|to=2391|frame=-1|Fragment\_11  
NGPQCSCHEGYHLAGDHLCTDINECKAELQQCGQICTNSAGSFHCSCYPEFMLRSDKRS  
CKAT

>Locus\_539\_Transcript\_3/3\_Confidence\_0.714\_Length\_5667|. |sp|P98163|  
YL\_DROME Putative vitellogenin receptor OS=Drosophila melanogaster  
GN=y1 PE=1 SV=2|e=2.46781E-62|from=316|to=2391|frame=-1|Fragment\_12  
GDQMSILYSTSNQIRELTLSPPSVKILFNRNIPKILSLDVSKHTSTLYFSLHL

>Locus\_539\_Transcript\_3/3\_Confidence\_0.714\_Length\_5667|. |sp|P98163|  
YL\_DROME Putative vitellogenin receptor OS=Drosophila melanogaster  
GN=y1 PE=1 SV=2|e=2.46781E-62|from=316|to=2391|frame=-1|Fragment\_13  
ISQIYRLDIKSGDVQYIMNIG

>Locus\_539\_Transcript\_3/3\_Confidence\_0.714\_Length\_5667|. |sp|P98163|  
YL\_DROME Putative vitellogenin receptor OS=Drosophila melanogaster  
GN=y1 PE=1 SV=2|e=2.46781E-62|from=316|to=2391|frame=-1|Fragment\_14  
KPMKLAVDWITQNIYFISEDLLHKTTLRVCHIENAACAILMKFDKNIAPPELVDPISKYI  
FYTVTHWVYDNPITILYRANLDGSHVIELRNEKLNLSGIGIDHHQKTVYYCDKHKNTI  
ESVSYNGSDHRILVKEQKLLTAPNGLDVFENYAYTLVYGSTRMIKCRFLFGNYACTVIDAY  
ISNADSFKISQYSKQLLHENACENSNCMYLCV

>Locus\_539\_Transcript\_3/3\_Confidence\_0.714\_Length\_5667|. |sp|P98163|  
YL\_DROME Putative vitellogenin receptor OS=Drosophila melanogaster  
GN=y1 PE=1 SV=2|e=2.46781E-62|from=316|to=2391|frame=-1|Fragment\_15  
PADSGPKCICKNGLMIAPGSSCVDDMD

>Locus\_539\_Transcript\_3/3\_Confidence\_0.714\_Length\_5667|. |sp|P98163|  
YL\_DROME Putative vitellogenin receptor OS=Drosophila melanogaster  
GN=y1 PE=1 SV=2|e=2.46781E-62|from=316|to=2391|frame=-1|Fragment\_16  
DHPQFGTMASNEQSTSVAVPIFLSLLLFAGAVAGSI

>Locus\_539\_Transcript\_2/3\_Confidence\_0.714\_Length\_5667|. |sp|P98163|

YL\_DROME Putative vitellogenin receptor OS=Drosophila melanogaster  
GN=y1 PE=1 SV=2|e=3.14358E-33|from=4708|to=5451|frame=-1|Fragment\_1  
VCPRSGFVFDHK

>Locus\_539\_Transcript\_2/3\_Confidence\_0.714\_Length\_5667|. |sp|P98163|  
YL\_DROME Putative vitellogenin receptor OS=Drosophila melanogaster  
GN=y1 PE=1 SV=2|e=3.14358E-33|from=4708|to=5451|frame=-1|Fragment\_2  
ECLTSEYTCGDGECISKTRICDGIKDKDDSDEHHC

>Locus\_539\_Transcript\_2/3\_Confidence\_0.714\_Length\_5667|. |sp|P98163|  
YL\_DROME Putative vitellogenin receptor OS=Drosophila melanogaster  
GN=y1 PE=1 SV=2|e=3.14358E-33|from=4708|to=5451|frame=-1|Fragment\_3  
EMYRCE

>Locus\_539\_Transcript\_2/3\_Confidence\_0.714\_Length\_5667|. |sp|P98163|  
YL\_DROME Putative vitellogenin receptor OS=Drosophila melanogaster  
GN=y1 PE=1 SV=2|e=3.14358E-33|from=4708|to=5451|frame=-1|Fragment\_4  
EPDWYRCADGE

>Locus\_539\_Transcript\_2/3\_Confidence\_0.714\_Length\_5667|. |sp|P98163|  
YL\_DROME Putative vitellogenin receptor OS=Drosophila melanogaster  
GN=y1 PE=1 SV=2|e=3.14358E-33|from=4708|to=5451|frame=-1|Fragment\_5  
CISSSFRCDKSMDCPSGSDEQNCEDFVYTPPSTNHSCEHNEWMCADRMCIPLFVFCNGDF  
DCMDKSDEDMGCKDQHACDG

>Locus\_539\_Transcript\_2/3\_Confidence\_0.714\_Length\_5667|. |sp|P98163|  
YL\_DROME Putative vitellogenin receptor OS=Drosophila melanogaster  
GN=y1 PE=1 SV=2|e=3.14358E-33|from=4708|to=5451|frame=-1|Fragment\_6  
FRCRNGHCISEDWVCDGAIDCADGSDEID

>Locus\_539\_Transcript\_2/3\_Confidence\_0.714\_Length\_5667|. |sp|P98163|  
YL\_DROME Putative vitellogenin receptor OS=Drosophila melanogaster  
GN=y1 PE=1 SV=2|e=3.14358E-33|from=4708|to=5451|frame=-1|Fragment\_7  
CDSR

>Locus\_539\_Transcript\_2/3\_Confidence\_0.714\_Length\_5667|. |sp|P98163|  
YL\_DROME Putative vitellogenin receptor OS=Drosophila melanogaster  
GN=y1 PE=1 SV=2|e=3.14358E-33|from=4708|to=5451|frame=-1|Fragment\_8  
PVTFCILEKDHYPICRDNSSCIPINKVCDNIPHCKDKSDE

>Locus\_539\_Transcript\_2/3\_Confidence\_0.714\_Length\_5667|. |sp|P98163|  
YL\_DROME Putative vitellogenin receptor OS=Drosophila melanogaster  
GN=y1 PE=1 SV=2|e=3.14358E-33|from=4708|to=5451|frame=-1|Fragment\_9  
GVGCQQDCTSLSCAKHCVKTPGPRCVCPS

>Locus\_539\_Transcript\_3/3\_Confidence\_0.714\_Length\_5667|. |sp|P98163|  
YL\_DROME Putative vitellogenin receptor OS=Drosophila melanogaster  
GN=y1 PE=1 SV=2|e=3.14358E-33|from=4708|to=5451|frame=-1|Fragment\_1  
VCPRSGFVFDHK

>Locus\_539\_Transcript\_3/3\_Confidence\_0.714\_Length\_5667|. |sp|P98163|  
YL\_DROME Putative vitellogenin receptor OS=Drosophila melanogaster  
GN=y1 PE=1 SV=2|e=3.14358E-33|from=4708|to=5451|frame=-1|Fragment\_2  
ECLTSEYTCGDGECISKTRICDGIKDKDDSDEHHC

>Locus\_539\_Transcript\_3/3\_Confidence\_0.714\_Length\_5667|. |sp|P98163|  
YL\_DROME Putative vitellogenin receptor OS=Drosophila melanogaster  
GN=y1 PE=1 SV=2|e=3.14358E-33|from=4708|to=5451|frame=-1|Fragment\_3  
EMYRCE

>Locus\_539\_Transcript\_3/3\_Confidence\_0.714\_Length\_5667|. |sp|P98163|  
YL\_DROME Putative vitellogenin receptor OS=Drosophila melanogaster  
GN=y1 PE=1 SV=2|e=3.14358E-33|from=4708|to=5451|frame=-1|Fragment\_4  
EPDWYRCADGE

>Locus\_539\_Transcript\_3/3\_Confidence\_0.714\_Length\_5667|. |sp|P98163|  
YL\_DROME Putative vitellogenin receptor OS=Drosophila melanogaster

GN=y1 PE=1 SV=2|e=3.14358E-33|from=4708|to=5451|frame=-1|Fragment\_5  
CISSFRCDKSMDCPSGSDEQNCEDFVYTPPSTNHSCEHNEWMCADRMCIPLFVFCNGDF  
DCMDKSDEDMGCKDQHACDG  
>Locus\_539\_Transcript\_3/3\_Confidence\_0.714\_Length\_5667|. |sp|P98163|  
YL\_DROME Putative vitellogenin receptor OS=Drosophila melanogaster  
GN=y1 PE=1 SV=2|e=3.14358E-33|from=4708|to=5451|frame=-1|Fragment\_6  
FRCRNGHCISEDWVCDGAIDCADGSDEID  
>Locus\_539\_Transcript\_3/3\_Confidence\_0.714\_Length\_5667|. |sp|P98163|  
YL\_DROME Putative vitellogenin receptor OS=Drosophila melanogaster  
GN=y1 PE=1 SV=2|e=3.14358E-33|from=4708|to=5451|frame=-1|Fragment\_7  
CDSR  
>Locus\_539\_Transcript\_3/3\_Confidence\_0.714\_Length\_5667|. |sp|P98163|  
YL\_DROME Putative vitellogenin receptor OS=Drosophila melanogaster  
GN=y1 PE=1 SV=2|e=3.14358E-33|from=4708|to=5451|frame=-1|Fragment\_8  
PVTFCILEKDHYPICRDNSSCIPINKVCDNIPHCKDKSDE  
>Locus\_539\_Transcript\_3/3\_Confidence\_0.714\_Length\_5667|. |sp|P98163|  
YL\_DROME Putative vitellogenin receptor OS=Drosophila melanogaster  
GN=y1 PE=1 SV=2|e=3.14358E-33|from=4708|to=5451|frame=-1|Fragment\_9  
GVGCQQDCTSLSCAKHCVKTPGPRCVCPS  
>Locus\_539\_Transcript\_2/3\_Confidence\_0.714\_Length\_5667|. |sp|P98163|  
YL\_DROME Putative vitellogenin receptor OS=Drosophila melanogaster  
GN=y1 PE=1 SV=2|e=1.67462E-18|from=3829|to=5172|frame=-1|Fragment\_1  
TPPSTNHSCEHNEWMCADRMCIPLFVFCNGDFDCMDKSDEDMGCKDQHAC  
>Locus\_539\_Transcript\_2/3\_Confidence\_0.714\_Length\_5667|. |sp|P98163|  
YL\_DROME Putative vitellogenin receptor OS=Drosophila melanogaster  
GN=y1 PE=1 SV=2|e=1.67462E-18|from=3829|to=5172|frame=-1|Fragment\_2  
DGFRCRNGH  
>Locus\_539\_Transcript\_2/3\_Confidence\_0.714\_Length\_5667|. |sp|P98163|  
YL\_DROME Putative vitellogenin receptor OS=Drosophila melanogaster  
GN=y1 PE=1 SV=2|e=1.67462E-18|from=3829|to=5172|frame=-1|Fragment\_3  
CISEDWVCDGAIDCADGSDEIDCDSRP  
>Locus\_539\_Transcript\_2/3\_Confidence\_0.714\_Length\_5667|. |sp|P98163|  
YL\_DROME Putative vitellogenin receptor OS=Drosophila melanogaster  
GN=y1 PE=1 SV=2|e=1.67462E-18|from=3829|to=5172|frame=-1|Fragment\_4  
VTFMCILEKDHYPICRDNSSCIPINKVCDNIPHCKDKSDEGVGCQQD  
>Locus\_539\_Transcript\_2/3\_Confidence\_0.714\_Length\_5667|. |sp|P98163|  
YL\_DROME Putative vitellogenin receptor OS=Drosophila melanogaster  
GN=y1 PE=1 SV=2|e=1.67462E-18|from=3829|to=5172|frame=-1|Fragment\_5  
CTSLSCAKHCVKTPG  
>Locus\_539\_Transcript\_2/3\_Confidence\_0.714\_Length\_5667|. |sp|P98163|  
YL\_DROME Putative vitellogenin receptor OS=Drosophila melanogaster  
GN=y1 PE=1 SV=2|e=1.67462E-18|from=3829|to=5172|frame=-1|Fragment\_6  
PRCVCPSGFHNPLNSDFSHMHKNWQYNNNDNCTDINE  
>Locus\_539\_Transcript\_2/3\_Confidence\_0.714\_Length\_5667|. |sp|P98163|  
YL\_DROME Putative vitellogenin receptor OS=Drosophila melanogaster  
GN=y1 PE=1 SV=2|e=1.67462E-18|from=3829|to=5172|frame=-1|Fragment\_7  
CAIHGMCSQRCENT  
>Locus\_539\_Transcript\_2/3\_Confidence\_0.714\_Length\_5667|. |sp|P98163|  
YL\_DROME Putative vitellogenin receptor OS=Drosophila melanogaster  
GN=y1 PE=1 SV=2|e=1.67462E-18|from=3829|to=5172|frame=-1|Fragment\_8  
IGSYKCLCDMK  
>Locus\_539\_Transcript\_2/3\_Confidence\_0.714\_Length\_5667|. |sp|P98163|  
YL\_DROME Putative vitellogenin receptor OS=Drosophila melanogaster  
GN=y1 PE=1 SV=2|e=1.67462E-18|from=3829|to=5172|frame=-1|Fragment\_9

YTLSSDKKCKVNGGEALLLFSSR

>Locus\_539\_Transcript\_2/3\_Confidence\_0.714\_Length\_5667|. |sp|P98163|  
YL\_DROME Putative vitellogenin receptor OS=Drosophila melanogaster  
GN=y1 PE=1 SV=2|e=1.67462E-18|from=3829|to=5172|frame=-1|Fragment\_10  
SNIRGLYLESKILFQVIKNQRQIIGVEYDGNHVYWTDVHLGTESILRSLEDGSQMEVLLT  
SGLSAPEDLALDWTGNIYFTDAELMHIGVCSNDGKHC

>Locus\_539\_Transcript\_2/3\_Confidence\_0.714\_Length\_5667|. |sp|P98163|  
YL\_DROME Putative vitellogenin receptor OS=Drosophila melanogaster  
GN=y1 PE=1 SV=2|e=1.67462E-18|from=3829|to=5172|frame=-1|Fragment\_11  
TIIVNENIHKPRAIALYPGRGQMFWSWGDNPQIATSSMDGSSPKLFVSTNLHWPNGISI  
DIPNKRLYWVDAKLQTIESINLDGTDRRIVLKGVTKHPYAIAIFEDQ

>Locus\_539\_Transcript\_2/3\_Confidence\_0.714\_Length\_5667|. |sp|P98163|  
YL\_DROME Putative vitellogenin receptor OS=Drosophila melanogaster  
GN=y1 PE=1 SV=2|e=1.67462E-18|from=3829|to=5172|frame=-1|Fragment\_12  
IYWSDWDSK

>Locus\_539\_Transcript\_3/3\_Confidence\_0.714\_Length\_5667|. |sp|P98163|  
YL\_DROME Putative vitellogenin receptor OS=Drosophila melanogaster  
GN=y1 PE=1 SV=2|e=1.67462E-18|from=3829|to=5172|frame=-1|Fragment\_1  
TPPSTNHSCHEHNEWMCADRMCIPLFVFCNGDFDCMDKSDEDMGCKDQHAC

>Locus\_539\_Transcript\_3/3\_Confidence\_0.714\_Length\_5667|. |sp|P98163|  
YL\_DROME Putative vitellogenin receptor OS=Drosophila melanogaster  
GN=y1 PE=1 SV=2|e=1.67462E-18|from=3829|to=5172|frame=-1|Fragment\_2  
DGFRCRNGH

>Locus\_539\_Transcript\_3/3\_Confidence\_0.714\_Length\_5667|. |sp|P98163|  
YL\_DROME Putative vitellogenin receptor OS=Drosophila melanogaster  
GN=y1 PE=1 SV=2|e=1.67462E-18|from=3829|to=5172|frame=-1|Fragment\_3  
CISEDWVCDGAIDCADGSDEIDCDSRP

>Locus\_539\_Transcript\_3/3\_Confidence\_0.714\_Length\_5667|. |sp|P98163|  
YL\_DROME Putative vitellogenin receptor OS=Drosophila melanogaster  
GN=y1 PE=1 SV=2|e=1.67462E-18|from=3829|to=5172|frame=-1|Fragment\_4  
VTFMCILEKDHYPICRDNSSCIPINKVCDNIPHCKDKSDEGVGCQQD

>Locus\_539\_Transcript\_3/3\_Confidence\_0.714\_Length\_5667|. |sp|P98163|  
YL\_DROME Putative vitellogenin receptor OS=Drosophila melanogaster  
GN=y1 PE=1 SV=2|e=1.67462E-18|from=3829|to=5172|frame=-1|Fragment\_5  
CTSLSCAKHCVKTPEG

>Locus\_539\_Transcript\_3/3\_Confidence\_0.714\_Length\_5667|. |sp|P98163|  
YL\_DROME Putative vitellogenin receptor OS=Drosophila melanogaster  
GN=y1 PE=1 SV=2|e=1.67462E-18|from=3829|to=5172|frame=-1|Fragment\_6  
PRCVCPSGFHNPLNSDFSHMHKNWQYNNNDNCTDINE

>Locus\_539\_Transcript\_3/3\_Confidence\_0.714\_Length\_5667|. |sp|P98163|  
YL\_DROME Putative vitellogenin receptor OS=Drosophila melanogaster  
GN=y1 PE=1 SV=2|e=1.67462E-18|from=3829|to=5172|frame=-1|Fragment\_7  
CAIHGMCSQRCENT

>Locus\_539\_Transcript\_3/3\_Confidence\_0.714\_Length\_5667|. |sp|P98163|  
YL\_DROME Putative vitellogenin receptor OS=Drosophila melanogaster  
GN=y1 PE=1 SV=2|e=1.67462E-18|from=3829|to=5172|frame=-1|Fragment\_8  
IGSYKCLCDMK

>Locus\_539\_Transcript\_3/3\_Confidence\_0.714\_Length\_5667|. |sp|P98163|  
YL\_DROME Putative vitellogenin receptor OS=Drosophila melanogaster  
GN=y1 PE=1 SV=2|e=1.67462E-18|from=3829|to=5172|frame=-1|Fragment\_9  
YTLSSDKKCKVNGGEALLLFSSR

>Locus\_539\_Transcript\_3/3\_Confidence\_0.714\_Length\_5667|. |sp|P98163|  
YL\_DROME Putative vitellogenin receptor OS=Drosophila melanogaster  
GN=y1 PE=1 SV=2|e=1.67462E-18|from=3829|to=5172|frame=-1|Fragment\_10

SNIRGLYLESKILFQVIKNQRQIIGVEYDGNHVYWTDVHLGTESILRSLEDGSQMEVLLT  
SGLSAPEDLALDWTGNIYFTDAELMHIGVCSNDGKHC  
>Locus\_539\_Transcript\_3/3\_Confidence\_0.714\_Length\_5667|. |sp|P98163|  
YL\_DROME Putative vitellogenin receptor OS=Drosophila melanogaster  
GN=y1 PE=1 SV=2|e=1.67462E-18|from=3829|to=5172|frame=-1|Fragment\_11  
TIIVNENIHKPRAIALYPGRGQMFWSWDGNDPQIATSSMDGSSPKLFVSTNLHWPNGISI  
DIPNKRLYWVDAKLQTIIESINLDGTDRRIVLKGVTKHPYAIAIFEDQ  
>Locus\_539\_Transcript\_3/3\_Confidence\_0.714\_Length\_5667|. |sp|P98163|  
YL\_DROME Putative vitellogenin receptor OS=Drosophila melanogaster  
GN=y1 PE=1 SV=2|e=1.67462E-18|from=3829|to=5172|frame=-1|Fragment\_12  
IYWSDWDSK  
>Locus\_539\_Transcript\_1/3\_Confidence\_0.714\_Length\_5649|. |sp|P98163|  
YL\_DROME Putative vitellogenin receptor OS=Drosophila melanogaster  
GN=y1 PE=1 SV=2|e=0|from=436|to=5394|frame=-1|Fragment\_1  
CLTSEYTCGDGECISKTRICDGIKDKDSDSEHHCCEMYRCEEPDWYRCAD  
>Locus\_539\_Transcript\_1/3\_Confidence\_0.714\_Length\_5649|. |sp|P98163|  
YL\_DROME Putative vitellogenin receptor OS=Drosophila melanogaster  
GN=y1 PE=1 SV=2|e=0|from=436|to=5394|frame=-1|Fragment\_2  
GECISSFRCDKSMDCPSGSDEQNC  
>Locus\_539\_Transcript\_1/3\_Confidence\_0.714\_Length\_5649|. |sp|P98163|  
YL\_DROME Putative vitellogenin receptor OS=Drosophila melanogaster  
GN=y1 PE=1 SV=2|e=0|from=436|to=5394|frame=-1|Fragment\_3  
DFVYTPPSTN  
>Locus\_539\_Transcript\_1/3\_Confidence\_0.714\_Length\_5649|. |sp|P98163|  
YL\_DROME Putative vitellogenin receptor OS=Drosophila melanogaster  
GN=y1 PE=1 SV=2|e=0|from=436|to=5394|frame=-1|Fragment\_4  
HSCEHNEWMCA  
>Locus\_539\_Transcript\_1/3\_Confidence\_0.714\_Length\_5649|. |sp|P98163|  
YL\_DROME Putative vitellogenin receptor OS=Drosophila melanogaster  
GN=y1 PE=1 SV=2|e=0|from=436|to=5394|frame=-1|Fragment\_5  
DRMCIPLEFVCGDFDCMDKSDDEMGCKDQHAC  
>Locus\_539\_Transcript\_1/3\_Confidence\_0.714\_Length\_5649|. |sp|P98163|  
YL\_DROME Putative vitellogenin receptor OS=Drosophila melanogaster  
GN=y1 PE=1 SV=2|e=0|from=436|to=5394|frame=-1|Fragment\_6  
DGFRCRNGHCIS  
>Locus\_539\_Transcript\_1/3\_Confidence\_0.714\_Length\_5649|. |sp|P98163|  
YL\_DROME Putative vitellogenin receptor OS=Drosophila melanogaster  
GN=y1 PE=1 SV=2|e=0|from=436|to=5394|frame=-1|Fragment\_7  
EDWVCDGAIDCADGSDEIDCSRVPVTFMCILEKDHYPCRDNSSCIPINKVCDNIPHCKDK  
SDEGVGCQQ  
>Locus\_539\_Transcript\_1/3\_Confidence\_0.714\_Length\_5649|. |sp|P98163|  
YL\_DROME Putative vitellogenin receptor OS=Drosophila melanogaster  
GN=y1 PE=1 SV=2|e=0|from=436|to=5394|frame=-1|Fragment\_8  
DCTSLSCA  
>Locus\_539\_Transcript\_1/3\_Confidence\_0.714\_Length\_5649|. |sp|P98163|  
YL\_DROME Putative vitellogenin receptor OS=Drosophila melanogaster  
GN=y1 PE=1 SV=2|e=0|from=436|to=5394|frame=-1|Fragment\_9  
KHCVKTP  
>Locus\_539\_Transcript\_1/3\_Confidence\_0.714\_Length\_5649|. |sp|P98163|  
YL\_DROME Putative vitellogenin receptor OS=Drosophila melanogaster  
GN=y1 PE=1 SV=2|e=0|from=436|to=5394|frame=-1|Fragment\_10  
EGPRCVCPSGFHNPLNSDFSHMHKNWQYNNNDNCTDINECAIHG  
>Locus\_539\_Transcript\_1/3\_Confidence\_0.714\_Length\_5649|. |sp|P98163|  
YL\_DROME Putative vitellogenin receptor OS=Drosophila melanogaster

GN=y1 PE=1 SV=2|e=0|from=436|to=5394|frame=-1|Fragment\_11  
MCSQRCENTIGSYKCLCDMKYTLSSDKKSK  
>Locus\_539\_Transcript\_1/3\_Confidence\_0.714\_Length\_5649|. |sp|P98163|  
YL\_DROME Putative vitellogenin receptor OS=Drosophila melanogaster  
GN=y1 PE=1 SV=2|e=0|from=436|to=5394|frame=-1|Fragment\_12  
VNGG  
>Locus\_539\_Transcript\_1/3\_Confidence\_0.714\_Length\_5649|. |sp|P98163|  
YL\_DROME Putative vitellogenin receptor OS=Drosophila melanogaster  
GN=y1 PE=1 SV=2|e=0|from=436|to=5394|frame=-1|Fragment\_13  
EALLLFSSRSNIRGLYLES  
>Locus\_539\_Transcript\_1/3\_Confidence\_0.714\_Length\_5649|. |sp|P98163|  
YL\_DROME Putative vitellogenin receptor OS=Drosophila melanogaster  
GN=y1 PE=1 SV=2|e=0|from=436|to=5394|frame=-1|Fragment\_14  
KILFQVIKNQRQIIGVEYDGNHVYWTDVHLGTESILRSLEDGSQMEVLLTSGLSAPEDLA  
LDWLTGNIYFTDAELMHIGVCSNDGKHCTIIVNENIHKPRAIALYPGRGQMFWSWDGNDP  
QIATSSMDGSSPKLFVSTNLHWPNGISIDIPNKRLYWVDAKLQTIIESINLDGTDRRIVLK  
GVTKHPYAI AIFEDQIYWSWDSKSIQSCNKFTCKNRVTVAKESKEYIYGIHIYHSALQP  
KHDHPCMKSSCSHLCLIKAH  
>Locus\_539\_Transcript\_1/3\_Confidence\_0.714\_Length\_5649|. |sp|P98163|  
YL\_DROME Putative vitellogenin receptor OS=Drosophila melanogaster  
GN=y1 PE=1 SV=2|e=0|from=436|to=5394|frame=-1|Fragment\_15  
EYSCACPEGKELSADKTSECRETQRQSELIIGAGNLMVSLMHQKLGRHEL  
>Locus\_539\_Transcript\_1/3\_Confidence\_0.714\_Length\_5649|. |sp|P98163|  
YL\_DROME Putative vitellogenin receptor OS=Drosophila melanogaster  
GN=y1 PE=1 SV=2|e=0|from=436|to=5394|frame=-1|Fragment\_16  
HGVPKINMDVLTYNLSNGEIIIVADNNKFIYTVDMYTTKSSRLTDIKSGEVEAMHFDNL  
ANLFWIDSVQQTIEVLHLDTGVKGFILHGLGDQVPVGFVFAIVPSHGIMFVAFRSHDHTHI  
DRMLLDGSGIRTHVVEDGLGRWGKISMVYDHLQRFVWAVEETGRIESSVVDGDRHGFR  
HTKDKPIAIAIILGNLFWTTAGNRRLYWADKHNLGNGFNKLTIDIER  
>Locus\_539\_Transcript\_1/3\_Confidence\_0.714\_Length\_5649|. |sp|P98163|  
YL\_DROME Putative vitellogenin receptor OS=Drosophila melanogaster  
GN=y1 PE=1 SV=2|e=0|from=436|to=5394|frame=-1|Fragment\_17  
NLKSVPLTAITPRTISNHL CIHENGCSHICIPMMQKISCHCPVGLSLVPPYNMSCETI  
IHCTGEQFRCSDTNKCIPMIFRCNGNKDCDFGEDES DCE  
>Locus\_539\_Transcript\_1/3\_Confidence\_0.714\_Length\_5649|. |sp|P98163|  
YL\_DROME Putative vitellogenin receptor OS=Drosophila melanogaster  
GN=y1 PE=1 SV=2|e=0|from=436|to=5394|frame=-1|Fragment\_18  
RYKDRQSCAVNEFQCNDG  
>Locus\_539\_Transcript\_1/3\_Confidence\_0.714\_Length\_5649|. |sp|P98163|  
YL\_DROME Putative vitellogenin receptor OS=Drosophila melanogaster  
GN=y1 PE=1 SV=2|e=0|from=436|to=5394|frame=-1|Fragment\_19  
ICIEYHYKCDKHFDCPKSDEENCENYVSSSKCTHAQFECANGQCIDNRLLCDVLPDCLD  
GSDEKMCDHVT  
>Locus\_539\_Transcript\_1/3\_Confidence\_0.714\_Length\_5649|. |sp|P98163|  
YL\_DROME Putative vitellogenin receptor OS=Drosophila melanogaster  
GN=y1 PE=1 SV=2|e=0|from=436|to=5394|frame=-1|Fragment\_20  
CESNMFQCQSGSCIPSSWECDGEIDCTDASDEHTFCEPNTCKDNQFTCTNGKCIDMDLKC  
DHEDDCGDSSEIRCPskekesttETFIDLITCEPTQYTCEES  
>Locus\_539\_Transcript\_1/3\_Confidence\_0.714\_Length\_5649|. |sp|P98163|  
YL\_DROME Putative vitellogenin receptor OS=Drosophila melanogaster  
GN=y1 PE=1 SV=2|e=0|from=436|to=5394|frame=-1|Fragment\_21  
GACLPEIARCNGTAECKYGEDERECTN  
>Locus\_539\_Transcript\_1/3\_Confidence\_0.714\_Length\_5649|. |sp|P98163|  
YL\_DROME Putative vitellogenin receptor OS=Drosophila melanogaster

GN=y1 PE=1 SV=2|e=0|from=436|to=5394|frame=-1|Fragment\_22  
CQLDEFTCNSG  
>Locus\_539\_Transcript\_1/3\_Confidence\_0.714\_Length\_5649|. |sp|P98163|  
YL\_DROME Putative vitellogenin receptor OS=Drosophila melanogaster  
GN=y1 PE=1 SV=2|e=0|from=436|to=5394|frame=-1|Fragment\_23  
QCIQRKWVCDKTRDCNDGSDDETITTVQPVH  
>Locus\_539\_Transcript\_1/3\_Confidence\_0.714\_Length\_5649|. |sp|P98163|  
YL\_DROME Putative vitellogenin receptor OS=Drosophila melanogaster  
GN=y1 PE=1 SV=2|e=0|from=436|to=5394|frame=-1|Fragment\_24  
SQFLP  
>Locus\_539\_Transcript\_1/3\_Confidence\_0.714\_Length\_5649|. |sp|P98163|  
YL\_DROME Putative vitellogenin receptor OS=Drosophila melanogaster  
GN=y1 PE=1 SV=2|e=0|from=436|to=5394|frame=-1|Fragment\_25  
VCDEDSFRCKSGGCVDLFLVFCNGIPDCFDGSDENGACNTSCDAIK  
>Locus\_539\_Transcript\_1/3\_Confidence\_0.714\_Length\_5649|. |sp|P98163|  
YL\_DROME Putative vitellogenin receptor OS=Drosophila melanogaster  
GN=y1 PE=1 SV=2|e=0|from=436|to=5394|frame=-1|Fragment\_26  
CKHKCSPTPNQPQCSCHEGYHLAGDHLSCDINECKAELQQCGQICTNSAGSFHCSCYPE  
FMLRSDKRCKATGDQMSILYSTSNQIRELTLSPPSVKILFNRNIPKILSLDVSKHTSTL  
YFSLHLISQIYRLDIKSGDVQYIMNIGKPMKLAVDWITQNIYFISEDDLHKTLRVCHIEN  
AACAILMKFDKNIAPVELVVDPIISKYIFYTVTHWVVDNPITILYRANLDGSHVIELRNE  
KLNLSIGIGIDHHQKTVYYCDKHKNTIESVSY  
>Locus\_539\_Transcript\_1/3\_Confidence\_0.714\_Length\_5649|. |sp|P98163|  
YL\_DROME Putative vitellogenin receptor OS=Drosophila melanogaster  
GN=y1 PE=1 SV=2|e=0|from=436|to=5394|frame=-1|Fragment\_27  
NGSDHR  
>Locus\_539\_Transcript\_1/3\_Confidence\_0.714\_Length\_5649|. |sp|P98163|  
YL\_DROME Putative vitellogenin receptor OS=Drosophila melanogaster  
GN=y1 PE=1 SV=2|e=0|from=436|to=5394|frame=-1|Fragment\_28  
ILVKEQKLLTAPNGLDVFENYAYTLVYGSTRMIKRLFGNYACTVIDAYISNADSFKISQ  
YSKQ  
>Locus\_539\_Transcript\_1/3\_Confidence\_0.714\_Length\_5649|. |sp|P98163|  
YL\_DROME Putative vitellogenin receptor OS=Drosophila melanogaster  
GN=y1 PE=1 SV=2|e=0|from=436|to=5394|frame=-1|Fragment\_29  
LLHENACENSNCMYLCVPADSGPKCICKNGLMIAPGSSC  
>Locus\_539\_Transcript\_1/3\_Confidence\_0.714\_Length\_5649|. |sp|P98163|  
YL\_DROME Putative vitellogenin receptor OS=Drosophila melanogaster  
GN=y1 PE=1 SV=2|e=1.94419E-67|from=3487|to=5400|frame=-1|Fragment\_1  
KECLTSEYTCGDGECISKTRICDGIKDKDSDSEHHCEMYRCEEPDWYRCADGECISSSF  
RCDKSMDCPSGSDEQNCEDFVYTPP  
>Locus\_539\_Transcript\_1/3\_Confidence\_0.714\_Length\_5649|. |sp|P98163|  
YL\_DROME Putative vitellogenin receptor OS=Drosophila melanogaster  
GN=y1 PE=1 SV=2|e=1.94419E-67|from=3487|to=5400|frame=-1|Fragment\_2  
STNHSCEHNEWMCAD  
>Locus\_539\_Transcript\_1/3\_Confidence\_0.714\_Length\_5649|. |sp|P98163|  
YL\_DROME Putative vitellogenin receptor OS=Drosophila melanogaster  
GN=y1 PE=1 SV=2|e=1.94419E-67|from=3487|to=5400|frame=-1|Fragment\_3  
RMCIPLEFVFCNGDFDCMDKSDGCKDQACDGFRCRNG  
>Locus\_539\_Transcript\_1/3\_Confidence\_0.714\_Length\_5649|. |sp|P98163|  
YL\_DROME Putative vitellogenin receptor OS=Drosophila melanogaster  
GN=y1 PE=1 SV=2|e=1.94419E-67|from=3487|to=5400|frame=-1|Fragment\_4  
HCISEDWVCDGAIDCADGSDEIDCDSPVTFMCILEKDHY  
>Locus\_539\_Transcript\_1/3\_Confidence\_0.714\_Length\_5649|. |sp|P98163|  
YL\_DROME Putative vitellogenin receptor OS=Drosophila melanogaster

GN=y1 PE=1 SV=2|e=1.94419E-67|from=3487|to=5400|frame=-1|Fragment\_5  
PCR  
>Locus\_539\_Transcript\_1/3\_Confidence\_0.714\_Length\_5649|. |sp|P98163|  
YL\_DROME Putative vitellogenin receptor OS=Drosophila melanogaster  
GN=y1 PE=1 SV=2|e=1.94419E-67|from=3487|to=5400|frame=-1|Fragment\_6  
DNSSCIPINKVCDNIPHCKDKSDEGVGCQDCTSLS  
>Locus\_539\_Transcript\_1/3\_Confidence\_0.714\_Length\_5649|. |sp|P98163|  
YL\_DROME Putative vitellogenin receptor OS=Drosophila melanogaster  
GN=y1 PE=1 SV=2|e=1.94419E-67|from=3487|to=5400|frame=-1|Fragment\_7  
CAKHCVKTPEGPRCVCPSGFHNPLNSDFSMMHKNWQYNNNDNCTDINECAIHGMCSQRCE  
NTIGSYKCLCDMKYTLSSDKKCKVNGGEALLFSSRSNIRGLYLESKILFQVI  
>Locus\_539\_Transcript\_1/3\_Confidence\_0.714\_Length\_5649|. |sp|P98163|  
YL\_DROME Putative vitellogenin receptor OS=Drosophila melanogaster  
GN=y1 PE=1 SV=2|e=1.94419E-67|from=3487|to=5400|frame=-1|Fragment\_8  
KNQRQIIGVEY  
>Locus\_539\_Transcript\_1/3\_Confidence\_0.714\_Length\_5649|. |sp|P98163|  
YL\_DROME Putative vitellogenin receptor OS=Drosophila melanogaster  
GN=y1 PE=1 SV=2|e=1.94419E-67|from=3487|to=5400|frame=-1|Fragment\_9  
DGNHVYWTDVHLGTESILRSLEDGSQMEVLLTSGLSAPEDLALDWTGNIIYFTDAELMHI  
GVCSNDGKHCTIIVNENIHKPRAI  
>Locus\_539\_Transcript\_1/3\_Confidence\_0.714\_Length\_5649|. |sp|P98163|  
YL\_DROME Putative vitellogenin receptor OS=Drosophila melanogaster  
GN=y1 PE=1 SV=2|e=1.94419E-67|from=3487|to=5400|frame=-1|Fragment\_10  
ALYPGRGQMFY  
>Locus\_539\_Transcript\_1/3\_Confidence\_0.714\_Length\_5649|. |sp|P98163|  
YL\_DROME Putative vitellogenin receptor OS=Drosophila melanogaster  
GN=y1 PE=1 SV=2|e=1.94419E-67|from=3487|to=5400|frame=-1|Fragment\_11  
SDWGD  
>Locus\_539\_Transcript\_1/3\_Confidence\_0.714\_Length\_5649|. |sp|P98163|  
YL\_DROME Putative vitellogenin receptor OS=Drosophila melanogaster  
GN=y1 PE=1 SV=2|e=1.94419E-67|from=3487|to=5400|frame=-1|Fragment\_12  
NPQIATSSMDGSSPKLFVSTNLHWPNGISIDIPNKRLYWVDAKLQTIIESINL  
>Locus\_539\_Transcript\_1/3\_Confidence\_0.714\_Length\_5649|. |sp|P98163|  
YL\_DROME Putative vitellogenin receptor OS=Drosophila melanogaster  
GN=y1 PE=1 SV=2|e=1.94419E-67|from=3487|to=5400|frame=-1|Fragment\_13  
DGTDRR  
>Locus\_539\_Transcript\_1/3\_Confidence\_0.714\_Length\_5649|. |sp|P98163|  
YL\_DROME Putative vitellogenin receptor OS=Drosophila melanogaster  
GN=y1 PE=1 SV=2|e=1.94419E-67|from=3487|to=5400|frame=-1|Fragment\_14  
IVLK  
>Locus\_539\_Transcript\_1/3\_Confidence\_0.714\_Length\_5649|. |sp|P98163|  
YL\_DROME Putative vitellogenin receptor OS=Drosophila melanogaster  
GN=y1 PE=1 SV=2|e=1.94419E-67|from=3487|to=5400|frame=-1|Fragment\_15  
GVTKHPYAIAIFEDQIYWSDWDSKSIQSC  
>Locus\_539\_Transcript\_1/3\_Confidence\_0.714\_Length\_5649|. |sp|P98163|  
YL\_DROME Putative vitellogenin receptor OS=Drosophila melanogaster  
GN=y1 PE=1 SV=2|e=1.94419E-67|from=3487|to=5400|frame=-1|Fragment\_16  
NKFTCKNRVTVAKESKEYIYGIHIYHSALQPKHDHPCMKSSCSHLCLIKAHEYSCACPE  
GKELSADKTSECRETQRQSELIIGAGNLMVSLMHQKLGRLHGH  
>Locus\_539\_Transcript\_1/3\_Confidence\_0.714\_Length\_5649|. |sp|P98163|  
YL\_DROME Putative vitellogenin receptor OS=Drosophila melanogaster  
GN=y1 PE=1 SV=2|e=1.10398E-62|from=316|to=2373|frame=-1|Fragment\_1  
SSSKCTHAQFECANGQCIDNRLLCDVLPDCLDGSDEKMC DHVTCE  
>Locus\_539\_Transcript\_1/3\_Confidence\_0.714\_Length\_5649|. |sp|P98163|

YL\_DROME Putative vitellogenin receptor OS=Drosophila melanogaster  
GN=y1 PE=1 SV=2|e=1.10398E-62|from=316|to=2373|frame=-1|Fragment\_2  
SNMFQCQS  
>Locus\_539\_Transcript\_1/3\_Confidence\_0.714\_Length\_5649|. |sp|P98163|  
YL\_DROME Putative vitellogenin receptor OS=Drosophila melanogaster  
GN=y1 PE=1 SV=2|e=1.10398E-62|from=316|to=2373|frame=-1|Fragment\_3  
GSCIPSSWECDEIDCTDASDE  
>Locus\_539\_Transcript\_1/3\_Confidence\_0.714\_Length\_5649|. |sp|P98163|  
YL\_DROME Putative vitellogenin receptor OS=Drosophila melanogaster  
GN=y1 PE=1 SV=2|e=1.10398E-62|from=316|to=2373|frame=-1|Fragment\_4  
HTFCEPNTCKDNQFTCTNGK  
>Locus\_539\_Transcript\_1/3\_Confidence\_0.714\_Length\_5649|. |sp|P98163|  
YL\_DROME Putative vitellogenin receptor OS=Drosophila melanogaster  
GN=y1 PE=1 SV=2|e=1.10398E-62|from=316|to=2373|frame=-1|Fragment\_5  
CIDMDLKCDEHDDCGDSSDEIR  
>Locus\_539\_Transcript\_1/3\_Confidence\_0.714\_Length\_5649|. |sp|P98163|  
YL\_DROME Putative vitellogenin receptor OS=Drosophila melanogaster  
GN=y1 PE=1 SV=2|e=1.10398E-62|from=316|to=2373|frame=-1|Fragment\_6  
CPSKEKETTETDFIDLITCEPTQYTCEESGACLPEIA  
>Locus\_539\_Transcript\_1/3\_Confidence\_0.714\_Length\_5649|. |sp|P98163|  
YL\_DROME Putative vitellogenin receptor OS=Drosophila melanogaster  
GN=y1 PE=1 SV=2|e=1.10398E-62|from=316|to=2373|frame=-1|Fragment\_7  
RCNGTAECKYGEDERECTNC  
>Locus\_539\_Transcript\_1/3\_Confidence\_0.714\_Length\_5649|. |sp|P98163|  
YL\_DROME Putative vitellogenin receptor OS=Drosophila melanogaster  
GN=y1 PE=1 SV=2|e=1.10398E-62|from=316|to=2373|frame=-1|Fragment\_8  
QLDEFTC  
>Locus\_539\_Transcript\_1/3\_Confidence\_0.714\_Length\_5649|. |sp|P98163|  
YL\_DROME Putative vitellogenin receptor OS=Drosophila melanogaster  
GN=y1 PE=1 SV=2|e=1.10398E-62|from=316|to=2373|frame=-1|Fragment\_9  
NSGQCIQRKWVCDKTRDCNDGSDETITTVQPVHSQFLPVCEDEDSFRCKSGGCVDLFLVCN  
GIPDCFDGSDENGACNTSCDAIKCK  
>Locus\_539\_Transcript\_1/3\_Confidence\_0.714\_Length\_5649|. |sp|P98163|  
YL\_DROME Putative vitellogenin receptor OS=Drosophila melanogaster  
GN=y1 PE=1 SV=2|e=1.10398E-62|from=316|to=2373|frame=-1|Fragment\_10  
HKCSPTP  
>Locus\_539\_Transcript\_1/3\_Confidence\_0.714\_Length\_5649|. |sp|P98163|  
YL\_DROME Putative vitellogenin receptor OS=Drosophila melanogaster  
GN=y1 PE=1 SV=2|e=1.10398E-62|from=316|to=2373|frame=-1|Fragment\_11  
NGPQCSCHEGYHLAGDHLSTINECKAELQQCGQICTNSAGSFHCSCYPEFMLRSDKRS  
CKAT  
>Locus\_539\_Transcript\_1/3\_Confidence\_0.714\_Length\_5649|. |sp|P98163|  
YL\_DROME Putative vitellogenin receptor OS=Drosophila melanogaster  
GN=y1 PE=1 SV=2|e=1.10398E-62|from=316|to=2373|frame=-1|Fragment\_12  
GDQMSILYSTSNQIRELTLSPPSVKILFNRNIPKILSLDVSKHTSTLYFSLHL  
>Locus\_539\_Transcript\_1/3\_Confidence\_0.714\_Length\_5649|. |sp|P98163|  
YL\_DROME Putative vitellogenin receptor OS=Drosophila melanogaster  
GN=y1 PE=1 SV=2|e=1.10398E-62|from=316|to=2373|frame=-1|Fragment\_13  
ISQIYRLDIKSGDVQYIMNIG  
>Locus\_539\_Transcript\_1/3\_Confidence\_0.714\_Length\_5649|. |sp|P98163|  
YL\_DROME Putative vitellogenin receptor OS=Drosophila melanogaster  
GN=y1 PE=1 SV=2|e=1.10398E-62|from=316|to=2373|frame=-1|Fragment\_14  
KPMKLAVDWITQNIYFISEDLLHKTTLRVCHIENAACAILMKFDKNIAPVELVVDPIISKYI  
FYTVTHWWVYDNPITILYRANLDGSHVIELRNEKLNLSGIGIDHHQKTVYYCDKHNTI

ESVSYNGSDHRILVKEQKLLTAPNGLDVFENYAYTLVYGSTRMIKRLFGNYACTVIDAY  
ISNADSFKISQYSKQLLHENACENSNCMYLCV  
>Locus\_539\_Transcript\_1/3\_Confidence\_0.714\_Length\_5649|. |sp|P98163|  
YL\_DROME Putative vitellogenin receptor OS=Drosophila melanogaster  
GN=y1 PE=1 SV=2|e=1.10398E-62|from=316|to=2373|frame=-1|Fragment\_15  
PADSGPKCICKNGLMIAPGSSCVDDMD  
>Locus\_539\_Transcript\_1/3\_Confidence\_0.714\_Length\_5649|. |sp|P98163|  
YL\_DROME Putative vitellogenin receptor OS=Drosophila melanogaster  
GN=y1 PE=1 SV=2|e=1.10398E-62|from=316|to=2373|frame=-1|Fragment\_16  
DHPQFGTMSNEQSTSVAVPIFLSLLLFVAVAGSI  
>Locus\_539\_Transcript\_1/3\_Confidence\_0.714\_Length\_5649|. |sp|P98163|  
YL\_DROME Putative vitellogenin receptor OS=Drosophila melanogaster  
GN=y1 PE=1 SV=2|e=3.13288E-33|from=4690|to=5433|frame=-1|Fragment\_1  
VCPRSGFVFDHK  
>Locus\_539\_Transcript\_1/3\_Confidence\_0.714\_Length\_5649|. |sp|P98163|  
YL\_DROME Putative vitellogenin receptor OS=Drosophila melanogaster  
GN=y1 PE=1 SV=2|e=3.13288E-33|from=4690|to=5433|frame=-1|Fragment\_2  
ECLTSEYTCGDGECISKTRICDGIKDKDDSDHEHC  
>Locus\_539\_Transcript\_1/3\_Confidence\_0.714\_Length\_5649|. |sp|P98163|  
YL\_DROME Putative vitellogenin receptor OS=Drosophila melanogaster  
GN=y1 PE=1 SV=2|e=3.13288E-33|from=4690|to=5433|frame=-1|Fragment\_3  
EMYRCE  
>Locus\_539\_Transcript\_1/3\_Confidence\_0.714\_Length\_5649|. |sp|P98163|  
YL\_DROME Putative vitellogenin receptor OS=Drosophila melanogaster  
GN=y1 PE=1 SV=2|e=3.13288E-33|from=4690|to=5433|frame=-1|Fragment\_4  
EPDWYRCADGE  
>Locus\_539\_Transcript\_1/3\_Confidence\_0.714\_Length\_5649|. |sp|P98163|  
YL\_DROME Putative vitellogenin receptor OS=Drosophila melanogaster  
GN=y1 PE=1 SV=2|e=3.13288E-33|from=4690|to=5433|frame=-1|Fragment\_5  
CISSSFRCDKSMDCPSGSDEQNCEDFVYTPPSTNHSCEHNEWMCADRMCIPLFVFCNGDF  
DCMDKSDDEMGCKDQHACDG  
>Locus\_539\_Transcript\_1/3\_Confidence\_0.714\_Length\_5649|. |sp|P98163|  
YL\_DROME Putative vitellogenin receptor OS=Drosophila melanogaster  
GN=y1 PE=1 SV=2|e=3.13288E-33|from=4690|to=5433|frame=-1|Fragment\_6  
FRCRNGHCISEDWVCDGAIIDCADGSDEID  
>Locus\_539\_Transcript\_1/3\_Confidence\_0.714\_Length\_5649|. |sp|P98163|  
YL\_DROME Putative vitellogenin receptor OS=Drosophila melanogaster  
GN=y1 PE=1 SV=2|e=3.13288E-33|from=4690|to=5433|frame=-1|Fragment\_7  
CDSR  
>Locus\_539\_Transcript\_1/3\_Confidence\_0.714\_Length\_5649|. |sp|P98163|  
YL\_DROME Putative vitellogenin receptor OS=Drosophila melanogaster  
GN=y1 PE=1 SV=2|e=3.13288E-33|from=4690|to=5433|frame=-1|Fragment\_8  
PVTFCILEKDHYPICRDNSSCIPINKVCDNIPHCKDKSDE  
>Locus\_539\_Transcript\_1/3\_Confidence\_0.714\_Length\_5649|. |sp|P98163|  
YL\_DROME Putative vitellogenin receptor OS=Drosophila melanogaster  
GN=y1 PE=1 SV=2|e=3.13288E-33|from=4690|to=5433|frame=-1|Fragment\_9  
GVGCQQDCTSLSCAKHCVKTPGPRCVCPS  
>Locus\_539\_Transcript\_1/3\_Confidence\_0.714\_Length\_5649|. |sp|P98163|  
YL\_DROME Putative vitellogenin receptor OS=Drosophila melanogaster  
GN=y1 PE=1 SV=2|e=1.66892E-18|from=3811|to=5154|frame=-1|Fragment\_1  
TPPSTNHSCEHNEWMCADRMCIPLFVFCNGDFDCMDKSDDEMGCKDQHAC  
>Locus\_539\_Transcript\_1/3\_Confidence\_0.714\_Length\_5649|. |sp|P98163|  
YL\_DROME Putative vitellogenin receptor OS=Drosophila melanogaster  
GN=y1 PE=1 SV=2|e=1.66892E-18|from=3811|to=5154|frame=-1|Fragment\_2

DGFRCRNGH

>Locus\_539\_Transcript\_1/3\_Confidence\_0.714\_Length\_5649|. |sp|P98163|  
YL\_DROME Putative vitellogenin receptor OS=Drosophila melanogaster  
GN=y1 PE=1 SV=2|e=1.66892E-18|from=3811|to=5154|frame=-1|Fragment\_3  
CISEDWCDGAIDCADGSDEIDCDSRP

>Locus\_539\_Transcript\_1/3\_Confidence\_0.714\_Length\_5649|. |sp|P98163|  
YL\_DROME Putative vitellogenin receptor OS=Drosophila melanogaster  
GN=y1 PE=1 SV=2|e=1.66892E-18|from=3811|to=5154|frame=-1|Fragment\_4  
VTFMCILEKDHYPCRDNSSCIPINKVCDNIPHCKDKSDEGVGCQQD

>Locus\_539\_Transcript\_1/3\_Confidence\_0.714\_Length\_5649|. |sp|P98163|  
YL\_DROME Putative vitellogenin receptor OS=Drosophila melanogaster  
GN=y1 PE=1 SV=2|e=1.66892E-18|from=3811|to=5154|frame=-1|Fragment\_5  
CTSLSCAKHCVKTPEG

>Locus\_539\_Transcript\_1/3\_Confidence\_0.714\_Length\_5649|. |sp|P98163|  
YL\_DROME Putative vitellogenin receptor OS=Drosophila melanogaster  
GN=y1 PE=1 SV=2|e=1.66892E-18|from=3811|to=5154|frame=-1|Fragment\_6  
PRCVCPSGFHNPLNSDFSHMHKNWQYNNNDNCTDINE

>Locus\_539\_Transcript\_1/3\_Confidence\_0.714\_Length\_5649|. |sp|P98163|  
YL\_DROME Putative vitellogenin receptor OS=Drosophila melanogaster  
GN=y1 PE=1 SV=2|e=1.66892E-18|from=3811|to=5154|frame=-1|Fragment\_7  
CAIHGMCSQRCENT

>Locus\_539\_Transcript\_1/3\_Confidence\_0.714\_Length\_5649|. |sp|P98163|  
YL\_DROME Putative vitellogenin receptor OS=Drosophila melanogaster  
GN=y1 PE=1 SV=2|e=1.66892E-18|from=3811|to=5154|frame=-1|Fragment\_8  
IGSYKCLCDMK

>Locus\_539\_Transcript\_1/3\_Confidence\_0.714\_Length\_5649|. |sp|P98163|  
YL\_DROME Putative vitellogenin receptor OS=Drosophila melanogaster  
GN=y1 PE=1 SV=2|e=1.66892E-18|from=3811|to=5154|frame=-1|Fragment\_9  
YTLSSDKKCKVNGGEALLLFSSR

>Locus\_539\_Transcript\_1/3\_Confidence\_0.714\_Length\_5649|. |sp|P98163|  
YL\_DROME Putative vitellogenin receptor OS=Drosophila melanogaster  
GN=y1 PE=1 SV=2|e=1.66892E-18|from=3811|to=5154|frame=-1|Fragment\_10  
SNIRGLYLESKILFQVIKNQRQIIGVEYDGNHVVYWDVHLGTESILRSLEDGSQMEVLLT  
SGLSAPEDLALDWTGNIYFTDAELMHIGVCSNDGKHC

>Locus\_539\_Transcript\_1/3\_Confidence\_0.714\_Length\_5649|. |sp|P98163|  
YL\_DROME Putative vitellogenin receptor OS=Drosophila melanogaster  
GN=y1 PE=1 SV=2|e=1.66892E-18|from=3811|to=5154|frame=-1|Fragment\_11  
TIIVNENIHKPRAIALYPGRGQMFWSWDGNDPQIATSSMDGSSPKLFVSTNLHWPNGISI  
DIPNKRLYWVDAKLQTIIESINLDGTDRRIVLKGVTKHPYAIIFEDQ

>Locus\_539\_Transcript\_1/3\_Confidence\_0.714\_Length\_5649|. |sp|P98163|  
YL\_DROME Putative vitellogenin receptor OS=Drosophila melanogaster  
GN=y1 PE=1 SV=2|e=1.66892E-18|from=3811|to=5154|frame=-1|Fragment\_12  
IYWSDWDSK

>Locus\_26707\_Transcript\_1/1\_Confidence\_1.000\_Length\_258|UNIGENE  
REPRESENTATIVE TRANSCRIPT|sp|Q04164|SAS\_DROME Putative epidermal  
cell surface receptor OS=Drosophila melanogaster GN=sas PE=2 SV=2|  
e=4.04109E-29|from=7|to=258|frame=-1|Fragment\_1  
IPFAGQNIELKAENMLRVKTEREIDVYGFEEKINATKIKSTTMEISWSGVPYPEDKFNV  
YRAIYQSETGKEDSSVFKVAKRES

>Locus\_6199\_Transcript\_1/1\_Confidence\_1.000\_Length\_3685|UNIGENE  
REPRESENTATIVE TRANSCRIPT|sp|Q05319|STUB\_DROME Serine proteinase  
stubble OS=Drosophila melanogaster GN=Sb PE=2 SV=2|e=3.5049E-155|  
from=757|to=2418|frame=1|Fragment\_1

EQHQRYKISPKPCSVNGHEGTCMFVYECIRSEGGKHVGCVDTFMFGSCCSHNLTDNAILP  
>Locus\_6199\_Transcript\_1/1\_Confidence\_1.000\_Length\_3685|UNIGENE  
REPRESENTATIVE TRANSCRIPT|sp|Q05319|STUB\_DROME Serine proteinase  
stubble OS=Drosophila melanogaster GN=Sb PE=2 SV=2|e=3.5049E-155|  
from=757|to=2418|frame=1|Fragment\_2  
PATSLL  
>Locus\_9565\_Transcript\_2/2\_Confidence\_0.875\_Length\_1216|UNIGENE  
REPRESENTATIVE TRANSCRIPT|sp|Q17292|OPSD\_CAMAT Rhodopsin  
OS=Camponotus atriceps PE=2 SV=1|e=5.0778E-149|from=9|to=1130|  
frame=-3|Fragment\_1  
GPEYSAYKWDRFNADPWANMTVVDKVPPEILHMVDVHWYQFPPMNPMPWH  
>Locus\_9565\_Transcript\_2/2\_Confidence\_0.875\_Length\_1216|UNIGENE  
REPRESENTATIVE TRANSCRIPT|sp|Q17292|OPSD\_CAMAT Rhodopsin  
OS=Camponotus atriceps PE=2 SV=1|e=5.0778E-149|from=9|to=1130|  
frame=-3|Fragment\_2  
GNGMVIYIFTSTKQLRTPSNLLVINLAVSDFLMMFWMSPPMVINCYETWILGPLMCELY  
GMFGSLCGCVSIWTMTMIAFDRYNVIVKGLAAKPLTNKGAVLRILLVWISSGLWGIAPFF  
GWNRYVPEGNMTACGTDYLNKDWFSRSYILVYSVFVYYLPLFCIIYSYFFIVRAVAEHEK  
SMREQAKMKV  
>Locus\_9565\_Transcript\_2/2\_Confidence\_0.875\_Length\_1216|UNIGENE  
REPRESENTATIVE TRANSCRIPT|sp|Q17292|OPSD\_CAMAT Rhodopsin  
OS=Camponotus atriceps PE=2 SV=1|e=5.0778E-149|from=9|to=1130|  
frame=-3|Fragment\_3  
AEFKLAKVALMTIALWFFAWTPYLVINYTGIFETFTISPLATIWGSLFAKANAVYNPIVY  
GISHPKYRAALFKKFPSLMCAPEPQPEVDLQSLASGVTAVSE  
>Locus\_10514\_Transcript\_1/3\_Confidence\_0.750\_Length\_2925|UNIGENE  
REPRESENTATIVE TRANSCRIPT|sp|Q24025|SOG\_DROME Dorsal-ventral  
patterning protein Sog OS=Drosophila melanogaster GN=sog PE=1 SV=1|  
e=4.6474E-155|from=3|to=1784|frame=3|Fragment\_1  
IILDEVRVRKPGHELVNIEVSSPVSAADMRLLTRGRLALTVESRRRPEALRLQGPVVTR  
ATCEIFQ  
>Locus\_10514\_Transcript\_1/3\_Confidence\_0.750\_Length\_2925|UNIGENE  
REPRESENTATIVE TRANSCRIPT|sp|Q24025|SOG\_DROME Dorsal-ventral  
patterning protein Sog OS=Drosophila melanogaster GN=sog PE=1 SV=1|  
e=4.6474E-155|from=3|to=1784|frame=3|Fragment\_2  
WLYLNRDGLVYNIQVDELDRTPMITLVDDSGKRTELEDLTPSLTADGRATGTLERL  
GPRVLEPLYAGNLAVNVATKTHQESLVRGRLVARPVADARDSPAGAILLKRPNLNTPAN  
>Locus\_10514\_Transcript\_1/3\_Confidence\_0.750\_Length\_2925|UNIGENE  
REPRESENTATIVE TRANSCRIPT|sp|Q24025|SOG\_DROME Dorsal-ventral  
patterning protein Sog OS=Drosophila melanogaster GN=sog PE=1 SV=1|  
e=4.6474E-155|from=3|to=1784|frame=3|Fragment\_3  
IVGVAWLAVDAADCSLHYDLSIAGRGSQRTMELYLEEVPIAPGAPVSRALLEEFTTT  
NVEGTLAGVTQGDARLETGVVFLDLKDKIKNETMLKATLKHIVPPNCLPHYTDNDVSA  
MSPTGGASYDPESNSLQGHSPVVISVDPGQRCFHSGRFYVEGAQWRSAAESCTMCSCVHG  
RVKCDAIKCPPLSKCRLEDRI  
>Locus\_10514\_Transcript\_1/3\_Confidence\_0.750\_Length\_2925|UNIGENE  
REPRESENTATIVE TRANSCRIPT|sp|Q24025|SOG\_DROME Dorsal-ventral  
patterning protein Sog OS=Drosophila melanogaster GN=sog PE=1 SV=1|  
e=4.6474E-155|from=3|to=1784|frame=3|Fragment\_4  
REGCCPVCTNNTVLPPTNSSAP  
>Locus\_10514\_Transcript\_1/3\_Confidence\_0.750\_Length\_2925|UNIGENE  
REPRESENTATIVE TRANSCRIPT|sp|Q24025|SOG\_DROME Dorsal-ventral  
patterning protein Sog OS=Drosophila melanogaster GN=sog PE=1 SV=1|  
e=4.6474E-155|from=3|to=1784|frame=3|Fragment\_5

RGCYLGDQFHKAGSSWHPYLPNGFDTCVCTCDMITLDIRCPRTQCPLRCDEKIAIRP  
DKKACCKVCPEIKNEAV  
>Locus\_10514\_Transcript\_1/3\_Confidence\_0.750\_Length\_2925|UNIGENE  
REPRESENTATIVE TRANSCRIPT|sp|Q24025|SOG\_DROME Dorsal-ventral  
patterning protein Sog OS=Drosophila melanogaster GN=sog PE=1 SV=1|  
e=4.6474E-155|from=3|to=1784|frame=3|Fragment\_6  
PMVISDPGTVQDQGTIEI  
>Locus\_10514\_Transcript\_1/3\_Confidence\_0.750\_Length\_2925|UNIGENE  
REPRESENTATIVE TRANSCRIPT|sp|Q24025|SOG\_DROME Dorsal-ventral  
patterning protein Sog OS=Drosophila melanogaster GN=sog PE=1 SV=1|  
e=4.6474E-155|from=3|to=1784|frame=3|Fragment\_7  
ARTNEQIMQDGGCKNPLGAPYENGKEWHPWLSSHGEQKCVTCRCKDGAIKCERKRCPRMS  
CANHRRAT  
>Locus\_10514\_Transcript\_2/3\_Confidence\_0.750\_Length\_2925|. |sp|  
Q24025|SOG\_DROME Dorsal-ventral patterning protein Sog OS=Drosophila  
melanogaster GN=sog PE=1 SV=1|e=4.6474E-155|from=3|to=1784|frame=3|  
Fragment\_1  
IILDEVRRVRKPGHELNVIEVSSPVSAADMRLLTRGRLALTVESRRRPEALRLQGPVVTR  
ATCEIFQ  
>Locus\_10514\_Transcript\_2/3\_Confidence\_0.750\_Length\_2925|. |sp|  
Q24025|SOG\_DROME Dorsal-ventral patterning protein Sog OS=Drosophila  
melanogaster GN=sog PE=1 SV=1|e=4.6474E-155|from=3|to=1784|frame=3|  
Fragment\_2  
WLYLNRDGALVYNIQVDELDRTPMITLVDDSGKRRTLEDLTPSLTADGRATGTLERL  
GPRVLEPLYAGNLAVNVATKTHQESLVRGRLVARPVADARDSPAGAILLKRPNLNTPAN  
>Locus\_10514\_Transcript\_2/3\_Confidence\_0.750\_Length\_2925|. |sp|  
Q24025|SOG\_DROME Dorsal-ventral patterning protein Sog OS=Drosophila  
melanogaster GN=sog PE=1 SV=1|e=4.6474E-155|from=3|to=1784|frame=3|  
Fragment\_3  
IVGVAWLAVDAADCSLHYDLSIAGRGSHQRTMELYLEEVPIAPGAPVSRALLEEEFTTT  
NVEGTLAGVTQGDARLETGVVFLDLKDKIKNETMLKATLKHIVPPNCLPHYTDNDVSA  
MSPTGGASYDPESNSLQGHSPVVISVDPGQRCFHSGRFYVEGAQWRSAAESCTMCSCVHG  
RVKCDAIKCPPLSKCRLEDRI  
>Locus\_10514\_Transcript\_2/3\_Confidence\_0.750\_Length\_2925|. |sp|  
Q24025|SOG\_DROME Dorsal-ventral patterning protein Sog OS=Drosophila  
melanogaster GN=sog PE=1 SV=1|e=4.6474E-155|from=3|to=1784|frame=3|  
Fragment\_4  
REGECCPVCTNNTVLPEPTNSSAP  
>Locus\_10514\_Transcript\_2/3\_Confidence\_0.750\_Length\_2925|. |sp|  
Q24025|SOG\_DROME Dorsal-ventral patterning protein Sog OS=Drosophila  
melanogaster GN=sog PE=1 SV=1|e=4.6474E-155|from=3|to=1784|frame=3|  
Fragment\_5  
RGCYLGDQFHKAGSSWHPYLPNGFDTCVCTCDMITLDIRCPRTQCPLRCDEKIAIRP  
DKKACCKVCPEIKNEAV  
>Locus\_10514\_Transcript\_2/3\_Confidence\_0.750\_Length\_2925|. |sp|  
Q24025|SOG\_DROME Dorsal-ventral patterning protein Sog OS=Drosophila  
melanogaster GN=sog PE=1 SV=1|e=4.6474E-155|from=3|to=1784|frame=3|  
Fragment\_6  
PMVISDPGTVQDQGTIEI  
>Locus\_10514\_Transcript\_2/3\_Confidence\_0.750\_Length\_2925|. |sp|  
Q24025|SOG\_DROME Dorsal-ventral patterning protein Sog OS=Drosophila  
melanogaster GN=sog PE=1 SV=1|e=4.6474E-155|from=3|to=1784|frame=3|  
Fragment\_7  
ARTNEQIMQDGGCKNPLGAPYENGKEWHPWLSSHGEQKCVTCRCKDGAIKCERKRCPRMS

CANHRRAT

>Locus\_10514\_Transcript\_3/3\_Confidence\_0.750\_Length\_2925|. |sp|  
Q24025|SOG\_DROME Dorsal-ventral patterning protein Sog OS=Drosophila  
melanogaster GN=sog PE=1 SV=1|e=4.6474E-155|from=3|to=1784|frame=3|  
Fragment\_1

IILDEVRRVRKPGHELNVIEVSSPVSAADMRLLTRGLALTVESRRRPEALRLQGPVVTR  
ATCEIFQ

>Locus\_10514\_Transcript\_3/3\_Confidence\_0.750\_Length\_2925|. |sp|  
Q24025|SOG\_DROME Dorsal-ventral patterning protein Sog OS=Drosophila  
melanogaster GN=sog PE=1 SV=1|e=4.6474E-155|from=3|to=1784|frame=3|  
Fragment\_2

WLYLNRD GALVYNIQVDELDR TQTPMITLVDDSGKRTELEDLTPSLTADGRATGTLERL  
GPRVLEPLYAGNLAVNVATKTHQESLVRGRLVARPVADARDSPAGAILLKRPNLNTPAN

>Locus\_10514\_Transcript\_3/3\_Confidence\_0.750\_Length\_2925|. |sp|  
Q24025|SOG\_DROME Dorsal-ventral patterning protein Sog OS=Drosophila  
melanogaster GN=sog PE=1 SV=1|e=4.6474E-155|from=3|to=1784|frame=3|  
Fragment\_3

IVGVAWLAVDAADCSLHYDLSIAGRGS HQRTMELYLEEVPFIAPGAPVSRALLEEEFTTT  
NVEGTLAGVTQGD LARLETGVVFLDLKDKIKNETMLKATLKHIVPPNCLPHYTDNDVSA  
MSPTGGASYDPESNSLQGHSPVVISVDPGQRCFHSGRFYVEGAQWRSAAESCTMCSCVHG  
RVKCDAIKCPPLSKCRLED RRI

>Locus\_10514\_Transcript\_3/3\_Confidence\_0.750\_Length\_2925|. |sp|  
Q24025|SOG\_DROME Dorsal-ventral patterning protein Sog OS=Drosophila  
melanogaster GN=sog PE=1 SV=1|e=4.6474E-155|from=3|to=1784|frame=3|  
Fragment\_4

REGCCPVCTNNTVLPEPTNSSAP

>Locus\_10514\_Transcript\_3/3\_Confidence\_0.750\_Length\_2925|. |sp|  
Q24025|SOG\_DROME Dorsal-ventral patterning protein Sog OS=Drosophila  
melanogaster GN=sog PE=1 SV=1|e=4.6474E-155|from=3|to=1784|frame=3|  
Fragment\_5

RGCYLGDQFHKAGSSWHPYLPPNGFDTCAVCTCDMITLDIRCPRTQCPPLRCDEKIAIRP  
DKKACCKVCPEIKNEAV

>Locus\_10514\_Transcript\_3/3\_Confidence\_0.750\_Length\_2925|. |sp|  
Q24025|SOG\_DROME Dorsal-ventral patterning protein Sog OS=Drosophila  
melanogaster GN=sog PE=1 SV=1|e=4.6474E-155|from=3|to=1784|frame=3|  
Fragment\_6

PMVISDPGTVQDQGTIEI

>Locus\_10514\_Transcript\_3/3\_Confidence\_0.750\_Length\_2925|. |sp|  
Q24025|SOG\_DROME Dorsal-ventral patterning protein Sog OS=Drosophila  
melanogaster GN=sog PE=1 SV=1|e=4.6474E-155|from=3|to=1784|frame=3|  
Fragment\_7

ARTNEQIMQDGGCKNPLGAPYENGKEWHPWLSSHGEQKCVTCRCKDGAIKCERKRCPRMS  
CANHRRAT

>Locus\_8703\_Transcript\_4/4\_Confidence\_0.556\_Length\_1512|. |sp|Q24025|  
SOG\_DROME Dorsal-ventral patterning protein Sog OS=Drosophila  
melanogaster GN=sog PE=1 SV=1|e=8.5658E-120|from=404|to=1510|  
frame=2|Fragment\_1

QARRQSPLMVEE

>Locus\_8703\_Transcript\_4/4\_Confidence\_0.556\_Length\_1512|. |sp|Q24025|  
SOG\_DROME Dorsal-ventral patterning protein Sog OS=Drosophila  
melanogaster GN=sog PE=1 SV=1|e=8.5658E-120|from=404|to=1510|  
frame=2|Fragment\_2

DGFRKNHRAA

>Locus\_8703\_Transcript\_4/4\_Confidence\_0.556\_Length\_1512|. |sp|Q24025|

SOG\_DROME Dorsal-ventral patterning protein Sog OS=Drosophila melanogaster GN=sog PE=1 SV=1|e=8.5658E-120|from=404|to=1510|frame=2|Fragment\_3  
ECTFGKQTRELGSTWFADLGPPFGVMYCIRCECTPVQKKRRIVARVQCRNIKNECPKPTC  
DEPVLHPGRCKCTCPGDIYSPDIPQDVSPNTNEEEKSMKHFAALLTGRSPLIHRREDL  
SAIIDSHNPRNVVATGRFDFHRKNLHYSFYVSQPASRPRALQFLDKSGSILEEHSLVTH  
>Locus\_8703\_Transcript\_4/4\_Confidence\_0.556\_Length\_1512|. |sp|Q24025|  
SOG\_DROME Dorsal-ventral patterning protein Sog OS=Drosophila melanogaster GN=sog PE=1 SV=1|e=8.5658E-120|from=404|to=1510|frame=2|Fragment\_4  
GEYQATGKVCVWRRVPKEYRRLKDEKLFVALLWNSDGVNHTGGELILSGRIGRYASL  
GTELFSSLLLE  
>Locus\_8703\_Transcript\_4/4\_Confidence\_0.556\_Length\_1512|. |sp|Q24025|  
SOG\_DROME Dorsal-ventral patterning protein Sog OS=Drosophila melanogaster GN=sog PE=1 SV=1|e=8.5658E-120|from=404|to=1510|frame=2|Fragment\_5  
PASGTDREMSGAGGTAVVSTSVGATPSIHLTILFNGIFSPDDGNDVPITVRLELVERGL  
IILDEVRRVRKPGHELVNIEVSSPVSAADMRLLTRGL  
>Locus\_8703\_Transcript\_3/4\_Confidence\_0.444\_Length\_1474|. |sp|Q24025|  
SOG\_DROME Dorsal-ventral patterning protein Sog OS=Drosophila melanogaster GN=sog PE=1 SV=1|e=2.4993E-116|from=404|to=1474|frame=2|Fragment\_1  
QARRQSPLMVEE  
>Locus\_8703\_Transcript\_3/4\_Confidence\_0.444\_Length\_1474|. |sp|Q24025|  
SOG\_DROME Dorsal-ventral patterning protein Sog OS=Drosophila melanogaster GN=sog PE=1 SV=1|e=2.4993E-116|from=404|to=1474|frame=2|Fragment\_2  
DGFRKNHRAA  
>Locus\_8703\_Transcript\_3/4\_Confidence\_0.444\_Length\_1474|. |sp|Q24025|  
SOG\_DROME Dorsal-ventral patterning protein Sog OS=Drosophila melanogaster GN=sog PE=1 SV=1|e=2.4993E-116|from=404|to=1474|frame=2|Fragment\_3  
ECTFGKQTRELGSTWFADLGPPFGVMYCIRCECTPVQKKRRIVARVQCRNIKNECPKPTC  
DEPVLHPGRCKCTCPGDIYSPDIPQDVSPNTNEEEKSMKHFAALLTGRSPLIHRREDL  
SAIIDSHNPRNVVATGRFDFHRKNLHYSFYVSQPASRPRALQFLDKSGSILEEHSLVTH  
>Locus\_8703\_Transcript\_3/4\_Confidence\_0.444\_Length\_1474|. |sp|Q24025|  
SOG\_DROME Dorsal-ventral patterning protein Sog OS=Drosophila melanogaster GN=sog PE=1 SV=1|e=2.4993E-116|from=404|to=1474|frame=2|Fragment\_4  
GEYQATGKVCVWRRVPKEYRRLKDEKLFVALLWNSDGVNHTGGELILSGRIGRYASL  
GTELFSSLLLE  
>Locus\_8703\_Transcript\_3/4\_Confidence\_0.444\_Length\_1474|. |sp|Q24025|  
SOG\_DROME Dorsal-ventral patterning protein Sog OS=Drosophila melanogaster GN=sog PE=1 SV=1|e=2.4993E-116|from=404|to=1474|frame=2|Fragment\_5  
PAAGTDREMSGAGGTAVVSTSVGATPSIHLTILFNGIFSPDDGNDVPITVRLELVERGL  
IILDEVRRVRKPGHELVNIEVSSPVS  
>Locus\_8703\_Transcript\_1/4\_Confidence\_0.444\_Length\_1453|. |sp|Q24025|  
SOG\_DROME Dorsal-ventral patterning protein Sog OS=Drosophila melanogaster GN=sog PE=1 SV=1|e=4.3296E-113|from=404|to=1453|frame=2|Fragment\_1  
QARRQSPLMVEE  
>Locus\_8703\_Transcript\_1/4\_Confidence\_0.444\_Length\_1453|. |sp|Q24025|  
SOG\_DROME Dorsal-ventral patterning protein Sog OS=Drosophila

melanogaster GN=sog PE=1 SV=1|e=4.3296E-113|from=404|to=1453|  
frame=2|Fragment\_2  
DGFRKNHRAA  
>Locus\_8703\_Transcript\_1/4\_Confidence\_0.444\_Length\_1453|. |sp|Q24025|  
SOG\_DROME Dorsal-ventral patterning protein Sog OS=Drosophila  
melanogaster GN=sog PE=1 SV=1|e=4.3296E-113|from=404|to=1453|  
frame=2|Fragment\_3  
ECTFGKQTRRELGSTWFADLGPPFGVMYCIRCECTPVQKKRRIVARVQCRNIKNECPKPTC  
DEPVLHPGRCCCKTCPGDIYSPDIPQDVSPNTNEEEEEKSMKHFAALLTGRSPLIHRREDL  
SAIIDSHNPRNVVATGRFDFHRKLNHYSFYVSQPASRPRALQFLDKSGSILEEHSLVTH  
>Locus\_8703\_Transcript\_1/4\_Confidence\_0.444\_Length\_1453|. |sp|Q24025|  
SOG\_DROME Dorsal-ventral patterning protein Sog OS=Drosophila  
melanogaster GN=sog PE=1 SV=1|e=4.3296E-113|from=404|to=1453|  
frame=2|Fragment\_4  
GEYQATGKVCVWRRVPKEYRRLKDEKLFVALLWNSDGVNHTGGELILSGRIGRYASL  
GTFLFSSLLE  
>Locus\_8703\_Transcript\_1/4\_Confidence\_0.444\_Length\_1453|. |sp|Q24025|  
SOG\_DROME Dorsal-ventral patterning protein Sog OS=Drosophila  
melanogaster GN=sog PE=1 SV=1|e=4.3296E-113|from=404|to=1453|  
frame=2|Fragment\_5  
PASGTDREMSGAGGTAVVSTSVGATPSIHLTILFNGIFSPDDGNDVPITVRLELVERGL  
IILDEVRRVRKPGHELNVI  
>Locus\_4007\_Transcript\_2/2\_Confidence\_0.667\_Length\_2248|UNIGENE  
REPRESENTATIVE TRANSCRIPT|sp|Q24048|ATPB2\_DROME Sodium/potassium-  
transporting ATPase subunit beta-2 OS=Drosophila melanogaster  
GN=nrv2 PE=1 SV=2|e=1.1971E-123|from=1113|to=2102|frame=-3|  
Fragment\_1  
PTMNQKDQDKQLEFYQHYYKKPKKYDFTTWAGIKLFAYDKKTGEIFGRTGSSWSKIGIFY  
TIFYGVLAALVAICMWWFFQTLDPRIKWLDESIIGTNPGLGFRPLPPDENIESTLIWY  
KGTDLNYSRWTKSLSEFLQFYKTPGLTYNRGQNIYSCDYNSPPPKGMVCDVDVKAWGPC  
IEENNFNYHKSAPCVILKLNKIFGWVPEYYNDTNSLPEKMPEELKNYIRNDPEIVANPAM  
RNTVWVSCEGENPADVEHIGTIKYYPKRGF  
>Locus\_4007\_Transcript\_2/2\_Confidence\_0.667\_Length\_2248|UNIGENE  
REPRESENTATIVE TRANSCRIPT|sp|Q24048|ATPB2\_DROME Sodium/potassium-  
transporting ATPase subunit beta-2 OS=Drosophila melanogaster  
GN=nrv2 PE=1 SV=2|e=1.1971E-123|from=1113|to=2102|frame=-3|  
Fragment\_2  
YLSPLVAVHFERPKTGILINIECKAWAHNVIHDRHDRIGSVHFELMVD  
>Locus\_18836\_Transcript\_1/2\_Confidence\_0.750\_Length\_1142|UNIGENE  
REPRESENTATIVE TRANSCRIPT|sp|Q24247|ITA1\_DROME Integrin alpha-PS1  
OS=Drosophila melanogaster GN=mew PE=1 SV=2|e=3.40138E-83|from=2|  
to=1132|frame=-2|Fragment\_1  
EFKGDHVTSWLLAGAPLGQNLQTGSNRSGAFFKCPLTPNKDDCMQVMTDG  
>Locus\_18836\_Transcript\_1/2\_Confidence\_0.750\_Length\_1142|UNIGENE  
REPRESENTATIVE TRANSCRIPT|sp|Q24247|ITA1\_DROME Integrin alpha-PS1  
OS=Drosophila melanogaster GN=mew PE=1 SV=2|e=3.40138E-83|from=2|  
to=1132|frame=-2|Fragment\_2  
TTKSEDQIKTGQWLGVSVS  
>Locus\_18836\_Transcript\_1/2\_Confidence\_0.750\_Length\_1142|UNIGENE  
REPRESENTATIVE TRANSCRIPT|sp|Q24247|ITA1\_DROME Integrin alpha-PS1  
OS=Drosophila melanogaster GN=mew PE=1 SV=2|e=3.40138E-83|from=2|  
to=1132|frame=-2|Fragment\_3  
ASTDFTGGQAAVCAHRYAEIINENVVVGKGLCFVFDQDLGVPEQFEPCKGKPHVRGHLQY  
GLCQAGISTSFYNN

>Locus\_18836\_Transcript\_1/2\_Confidence\_0.750\_Length\_1142|UNIGENE REPRESENTATIVE TRANSCRIPT|sp|Q24247|ITA1\_DROME Integrin alpha-PS1 OS=Drosophila melanogaster GN=mew PE=1 SV=2|e=3.40138E-83|from=2|to=1132|frame=-2|Fragment\_4  
SLLIGAPGAYTWTGMVFLKPTNDFSE

>Locus\_18836\_Transcript\_1/2\_Confidence\_0.750\_Length\_1142|UNIGENE REPRESENTATIVE TRANSCRIPT|sp|Q24247|ITA1\_DROME Integrin alpha-PS1 OS=Drosophila melanogaster GN=mew PE=1 SV=2|e=3.40138E-83|from=2|to=1132|frame=-2|Fragment\_5  
TWETKVEQLGNEKE

>Locus\_18836\_Transcript\_1/2\_Confidence\_0.750\_Length\_1142|UNIGENE REPRESENTATIVE TRANSCRIPT|sp|Q24247|ITA1\_DROME Integrin alpha-PS1 OS=Drosophila melanogaster GN=mew PE=1 SV=2|e=3.40138E-83|from=2|to=1132|frame=-2|Fragment\_6  
YGYRGMSSVGGNFLNVPSIAIGAPRDNNYGSILIAVESNIPSRTLEVKMILYGEQFGSGF  
GHEIIRADVNGDKRDDLIIVGAPYYFEQNNGGAVYIYLN EEGVTNTYFKRLLGPRPESRF  
GIALACLGLNKGDYEDIAVGAPEDGPGGAVYIFLGSKDGLQESPSQVIHAHT

>Locus\_18836\_Transcript\_1/2\_Confidence\_0.750\_Length\_1142|UNIGENE REPRESENTATIVE TRANSCRIPT|sp|Q24247|ITA1\_DROME Integrin alpha-PS1 OS=Drosophila melanogaster GN=mew PE=1 SV=2|e=3.40138E-83|from=2|to=1132|frame=-2|Fragment\_7  
GLL

>Locus\_18836\_Transcript\_1/2\_Confidence\_0.750\_Length\_1142|UNIGENE REPRESENTATIVE TRANSCRIPT|sp|Q24247|ITA1\_DROME Integrin alpha-PS1 OS=Drosophila melanogaster GN=mew PE=1 SV=2|e=3.40138E-83|from=2|to=1132|frame=-2|Fragment\_8  
KGIKTFGYSLSGGLD

>Locus\_31460\_Transcript\_1/1\_Confidence\_1.000\_Length\_428|. |sp|Q24247|ITA1\_DROME Integrin alpha-PS1 OS=Drosophila melanogaster GN=mew PE=1 SV=2|e=6.90854E-42|from=1|to=426|frame=1|Fragment\_1  
GTGQVVIFKKTKNVNPMEVIYVIPGEQFGSSFGYEIARADINGDGWDDMIVGAPFYFSKD  
KGGAVYVFINNKGFRGENYSSRLGPKYDSRFGFALAAVGDNLKDGCEIDAVGAPYEGSG  
AVYIFFGSRQGIQEKPSQVIHA

>Locus\_12799\_Transcript\_2/4\_Confidence\_0.667\_Length\_2171|UNIGENE REPRESENTATIVE TRANSCRIPT|sp|Q24270|CAC1D\_DROME Voltage-dependent calcium channel type D subunit alpha-1 OS=Drosophila melanogaster GN=Ca-alpha1D PE=1 SV=2|e=0|from=1|to=2166|frame=1|Fragment\_1  
SLGFQGYFVSLFNRFD CFVVIGSIGEMILTNTKVMPLGVS

>Locus\_12799\_Transcript\_2/4\_Confidence\_0.667\_Length\_2171|UNIGENE REPRESENTATIVE TRANSCRIPT|sp|Q24270|CAC1D\_DROME Voltage-dependent calcium channel type D subunit alpha-1 OS=Drosophila melanogaster GN=Ca-alpha1D PE=1 SV=2|e=0|from=1|to=2166|frame=1|Fragment\_2  
FKVTKYWR

>Locus\_12799\_Transcript\_2/4\_Confidence\_0.667\_Length\_2171|UNIGENE REPRESENTATIVE TRANSCRIPT|sp|Q24270|CAC1D\_DROME Voltage-dependent calcium channel type D subunit alpha-1 OS=Drosophila melanogaster GN=Ca-alpha1D PE=1 SV=2|e=0|from=1|to=2166|frame=1|Fragment\_3  
GMQVFGGKFNFDPTKDKPRGNFDSFWQSLLTVFQILTGEDWNVVMDGIQAYGGVASIGI  
LACIYFIILFICGN YILLNVFLAIAVDNLADAESLTAI

>Locus\_12799\_Transcript\_2/4\_Confidence\_0.667\_Length\_2171|UNIGENE REPRESENTATIVE TRANSCRIPT|sp|Q24270|CAC1D\_DROME Voltage-dependent calcium channel type D subunit alpha-1 OS=Drosophila melanogaster GN=Ca-alpha1D PE=1 SV=2|e=0|from=1|to=2166|frame=1|Fragment\_4  
SHSPTPVLQDEECLDEDMDGDGERNMYD GEMSEQGD E TASEAKVRL

>Locus\_12799\_Transcript\_2/4\_Confidence\_0.667\_Length\_2171|UNIGENE REPRESENTATIVE TRANSCRIPT|sp|Q24270|CAC1D\_DROME Voltage-dependent calcium channel type D subunit alpha-1 OS=Drosophila melanogaster GN=Ca-alpha1D PE=1 SV=2|e=0|from=1|to=2166|frame=1|Fragment\_5 IIVESARPRRMSD

>Locus\_12799\_Transcript\_2/4\_Confidence\_0.667\_Length\_2171|UNIGENE REPRESENTATIVE TRANSCRIPT|sp|Q24270|CAC1D\_DROME Voltage-dependent calcium channel type D subunit alpha-1 OS=Drosophila melanogaster GN=Ca-alpha1D PE=1 SV=2|e=0|from=1|to=2166|frame=1|Fragment\_6 GSAFFILSQTNRFRVVFCHWLCNHSYFGNIILVCIMFSSAMLAEDPLNAASERNQILNYF DYFFTGAFTVELLLKLVSYGFLHKGAFCSAFNLLDLLVVCVSLISIIYFSSGAIS

>Locus\_12799\_Transcript\_2/4\_Confidence\_0.667\_Length\_2171|UNIGENE REPRESENTATIVE TRANSCRIPT|sp|Q24270|CAC1D\_DROME Voltage-dependent calcium channel type D subunit alpha-1 OS=Drosophila melanogaster GN=Ca-alpha1D PE=1 SV=2|e=0|from=1|to=2166|frame=1|Fragment\_7 AINRAKGLKHVVQCIVAVKTIGNIVLVTCLLQFMFAVIGVQLFKGKFFYCSDGSKMIES ECQGTYYVVFEDGDINKPEMRERIWRNKFHFDDVAKAMTLFTVSTFEGWPNLLYVSIDS NNENVGPIHNYRP

>Locus\_12799\_Transcript\_2/4\_Confidence\_0.667\_Length\_2171|UNIGENE REPRESENTATIVE TRANSCRIPT|sp|Q24270|CAC1D\_DROME Voltage-dependent calcium channel type D subunit alpha-1 OS=Drosophila melanogaster GN=Ca-alpha1D PE=1 SV=2|e=0|from=1|to=2166|frame=1|Fragment\_8 GFVIVTFQNEGEQEYKNCELDKNQRNCIEFALKAKPVRRIYIPKHRIQYKVVWFVTSQPFE YTIFILIMINTITLAMKFHRQPDMYTHALDVLNMIFTAFALEFVFKLAAFRFKNYFGDA WNVFDFIIVLGSFIDIVYSEV

>Locus\_12799\_Transcript\_4/4\_Confidence\_0.667\_Length\_2171|. |sp| Q24270|CAC1D\_DROME Voltage-dependent calcium channel type D subunit alpha-1 OS=Drosophila melanogaster GN=Ca-alpha1D PE=1 SV=2|e=0| from=1|to=2166|frame=1|Fragment\_1 SLGFQGYFVSLFNRFD CFVIGSIGEMILTNTKVMPLGVS

>Locus\_12799\_Transcript\_4/4\_Confidence\_0.667\_Length\_2171|. |sp| Q24270|CAC1D\_DROME Voltage-dependent calcium channel type D subunit alpha-1 OS=Drosophila melanogaster GN=Ca-alpha1D PE=1 SV=2|e=0| from=1|to=2166|frame=1|Fragment\_2 FKVTKYWR

>Locus\_12799\_Transcript\_4/4\_Confidence\_0.667\_Length\_2171|. |sp| Q24270|CAC1D\_DROME Voltage-dependent calcium channel type D subunit alpha-1 OS=Drosophila melanogaster GN=Ca-alpha1D PE=1 SV=2|e=0| from=1|to=2166|frame=1|Fragment\_3 GMQVFGGKFNFDPTKDKPRGNFDSFQSLTTFQILTGEDWNVVMYDGIQAYGGVASIGI LACIYFIILFICGNYILLNVFLAIAVDNLADAESLTAI

>Locus\_12799\_Transcript\_4/4\_Confidence\_0.667\_Length\_2171|. |sp| Q24270|CAC1D\_DROME Voltage-dependent calcium channel type D subunit alpha-1 OS=Drosophila melanogaster GN=Ca-alpha1D PE=1 SV=2|e=0| from=1|to=2166|frame=1|Fragment\_4 SHSPTPVLDQDEECLDEDMDGDGERNMYDGMSEQGETASEAKVRL

>Locus\_12799\_Transcript\_4/4\_Confidence\_0.667\_Length\_2171|. |sp| Q24270|CAC1D\_DROME Voltage-dependent calcium channel type D subunit alpha-1 OS=Drosophila melanogaster GN=Ca-alpha1D PE=1 SV=2|e=0| from=1|to=2166|frame=1|Fragment\_5 IIVESARPRRMSD

>Locus\_12799\_Transcript\_4/4\_Confidence\_0.667\_Length\_2171|. |sp| Q24270|CAC1D\_DROME Voltage-dependent calcium channel type D subunit alpha-1 OS=Drosophila melanogaster GN=Ca-alpha1D PE=1 SV=2|e=0|

from=1|to=2166|frame=1|Fragment\_6  
GSAFFILSQTNRFRVFCHWLCNHSYFGNIILVCIMFSSAMLAEDPLNAASERNQILNYF  
DYFFTGAFTVELLLKLVSYGFVLHKGAFCRSAFNLLDLLVVCVSLISIIYFSSGAIS  
>Locus\_12799\_Transcript\_4/4\_Confidence\_0.667\_Length\_2171|. |sp|  
Q24270|CAC1D\_DROME Voltage-dependent calcium channel type D subunit  
alpha-1 OS=Drosophila melanogaster GN=Ca-alpha1D PE=1 SV=2|e=0|  
from=1|to=2166|frame=1|Fragment\_7  
AINRAKGLKHVVQCVIVAVKTIGNIVLVTCLLQFMFAVIGVQLFKGKFFYCSDGSKMIES  
ECQGTYYVFEDGDINKPEMRERIWIRNKFHFDDVAKAMLTFTVSTFEGWPNLLYVSIDS  
NNENVGPIHNYRP  
>Locus\_12799\_Transcript\_4/4\_Confidence\_0.667\_Length\_2171|. |sp|  
Q24270|CAC1D\_DROME Voltage-dependent calcium channel type D subunit  
alpha-1 OS=Drosophila melanogaster GN=Ca-alpha1D PE=1 SV=2|e=0|  
from=1|to=2166|frame=1|Fragment\_8  
GFVIVTFQNEGEQEYKNCELDKNQRNCIEFALKAKPVRRIYKQVWVWFVTSQPFE  
YTIFILIMINTITLAMKFHRQPDMYTHALDVLNMIIFTAVFALEFVFKLAAFRFKNYFGDA  
WNVFDFIIVLGSFIDIVYSEV  
>Locus\_12799\_Transcript\_2/4\_Confidence\_0.667\_Length\_2171|. |sp|  
Q24270|CAC1D\_DROME Voltage-dependent calcium channel type D subunit  
alpha-1 OS=Drosophila melanogaster GN=Ca-alpha1D PE=1 SV=2|  
e=1.11454E-17|from=892|to=1623|frame=1|Fragment\_1  
AFFILSQTNRFRVFCHWLCNHSYFGNIILVCIMFSSAMLAEDPLNAASER  
>Locus\_12799\_Transcript\_2/4\_Confidence\_0.667\_Length\_2171|. |sp|  
Q24270|CAC1D\_DROME Voltage-dependent calcium channel type D subunit  
alpha-1 OS=Drosophila melanogaster GN=Ca-alpha1D PE=1 SV=2|  
e=1.11454E-17|from=892|to=1623|frame=1|Fragment\_2  
NQILNYFDYFFTGAFTVELLLKLVSYGFVLHKGAFCRSAFNLLDLLVVCVSLISIIYFSS  
>Locus\_12799\_Transcript\_2/4\_Confidence\_0.667\_Length\_2171|. |sp|  
Q24270|CAC1D\_DROME Voltage-dependent calcium channel type D subunit  
alpha-1 OS=Drosophila melanogaster GN=Ca-alpha1D PE=1 SV=2|  
e=1.11454E-17|from=892|to=1623|frame=1|Fragment\_3  
GAIS  
>Locus\_12799\_Transcript\_2/4\_Confidence\_0.667\_Length\_2171|. |sp|  
Q24270|CAC1D\_DROME Voltage-dependent calcium channel type D subunit  
alpha-1 OS=Drosophila melanogaster GN=Ca-alpha1D PE=1 SV=2|  
e=1.11454E-17|from=892|to=1623|frame=1|Fragment\_4  
AINRAKGLKHVVQCVIVAVKTIGNIVLVTCLLQFMFAVIGVQLFKGKF  
>Locus\_12799\_Transcript\_2/4\_Confidence\_0.667\_Length\_2171|. |sp|  
Q24270|CAC1D\_DROME Voltage-dependent calcium channel type D subunit  
alpha-1 OS=Drosophila melanogaster GN=Ca-alpha1D PE=1 SV=2|  
e=1.11454E-17|from=892|to=1623|frame=1|Fragment\_5  
FYCSDGSKMIESECQGTYYVFEDGDINKPEMRERIWIRNKFHFDDVAKAMLTFTVSTFE  
GWPNNLY  
>Locus\_12799\_Transcript\_4/4\_Confidence\_0.667\_Length\_2171|. |sp|  
Q24270|CAC1D\_DROME Voltage-dependent calcium channel type D subunit  
alpha-1 OS=Drosophila melanogaster GN=Ca-alpha1D PE=1 SV=2|  
e=1.11454E-17|from=892|to=1623|frame=1|Fragment\_1  
AFFILSQTNRFRVFCHWLCNHSYFGNIILVCIMFSSAMLAEDPLNAASER  
>Locus\_12799\_Transcript\_4/4\_Confidence\_0.667\_Length\_2171|. |sp|  
Q24270|CAC1D\_DROME Voltage-dependent calcium channel type D subunit  
alpha-1 OS=Drosophila melanogaster GN=Ca-alpha1D PE=1 SV=2|  
e=1.11454E-17|from=892|to=1623|frame=1|Fragment\_2  
NQILNYFDYFFTGAFTVELLLKLVSYGFVLHKGAFCRSAFNLLDLLVVCVSLISIIYFSS  
>Locus\_12799\_Transcript\_4/4\_Confidence\_0.667\_Length\_2171|. |sp|

Q24270|CAC1D\_DROME Voltage-dependent calcium channel type D subunit  
alpha-1 OS=Drosophila melanogaster GN=Ca-alpha1D PE=1 SV=2|  
e=1.11454E-17|from=892|to=1623|frame=1|Fragment\_3  
GAIS

>Locus\_12799\_Transcript\_4/4\_Confidence\_0.667\_Length\_2171|. |sp|  
Q24270|CAC1D\_DROME Voltage-dependent calcium channel type D subunit  
alpha-1 OS=Drosophila melanogaster GN=Ca-alpha1D PE=1 SV=2|  
e=1.11454E-17|from=892|to=1623|frame=1|Fragment\_4  
AINRAKGLKHVVQCVIVAVKTIGNIVLVTCLLQFMFAVIGVQLFKGKF

>Locus\_12799\_Transcript\_4/4\_Confidence\_0.667\_Length\_2171|. |sp|  
Q24270|CAC1D\_DROME Voltage-dependent calcium channel type D subunit  
alpha-1 OS=Drosophila melanogaster GN=Ca-alpha1D PE=1 SV=2|  
e=1.11454E-17|from=892|to=1623|frame=1|Fragment\_5  
FYCSDGSKMIESECQGTYYVVFEDGDINKPEMRERIWIIRNKFHFDDVAKAMLTFTVSTFE  
GWPNNLLY

>Locus\_12799\_Transcript\_1/4\_Confidence\_0.556\_Length\_2123|. |sp|  
Q24270|CAC1D\_DROME Voltage-dependent calcium channel type D subunit  
alpha-1 OS=Drosophila melanogaster GN=Ca-alpha1D PE=1 SV=2|e=0|  
from=1|to=2118|frame=1|Fragment\_1  
CFVVGISIGEMILTNTKVMPLGVS

>Locus\_12799\_Transcript\_1/4\_Confidence\_0.556\_Length\_2123|. |sp|  
Q24270|CAC1D\_DROME Voltage-dependent calcium channel type D subunit  
alpha-1 OS=Drosophila melanogaster GN=Ca-alpha1D PE=1 SV=2|e=0|  
from=1|to=2118|frame=1|Fragment\_2  
FKVTKYWR

>Locus\_12799\_Transcript\_1/4\_Confidence\_0.556\_Length\_2123|. |sp|  
Q24270|CAC1D\_DROME Voltage-dependent calcium channel type D subunit  
alpha-1 OS=Drosophila melanogaster GN=Ca-alpha1D PE=1 SV=2|e=0|  
from=1|to=2118|frame=1|Fragment\_3  
GMQVFGGKFNFDPTKDKPRGNFDSFWQSLLTVFQILTGEDWNVVMYDGIQAYGGVASIGI  
LACIYFIILFICGNYILLNVFLAIAVDNLADAESLTAI

>Locus\_12799\_Transcript\_1/4\_Confidence\_0.556\_Length\_2123|. |sp|  
Q24270|CAC1D\_DROME Voltage-dependent calcium channel type D subunit  
alpha-1 OS=Drosophila melanogaster GN=Ca-alpha1D PE=1 SV=2|e=0|  
from=1|to=2118|frame=1|Fragment\_4  
SHSPTPVLQDEECLDEDMDGDGERMNYDGMSEQGETASEAKVRL

>Locus\_12799\_Transcript\_1/4\_Confidence\_0.556\_Length\_2123|. |sp|  
Q24270|CAC1D\_DROME Voltage-dependent calcium channel type D subunit  
alpha-1 OS=Drosophila melanogaster GN=Ca-alpha1D PE=1 SV=2|e=0|  
from=1|to=2118|frame=1|Fragment\_5  
IIVESARPRMSD

>Locus\_12799\_Transcript\_1/4\_Confidence\_0.556\_Length\_2123|. |sp|  
Q24270|CAC1D\_DROME Voltage-dependent calcium channel type D subunit  
alpha-1 OS=Drosophila melanogaster GN=Ca-alpha1D PE=1 SV=2|e=0|  
from=1|to=2118|frame=1|Fragment\_6  
GSAFFILSQTNRFRVFCWLCNHSYFGNIILVCIMFSSAMLAEDPLNAASERNQILNYF  
DYFFTGAFTVELLLKLVSYGFVLHKGAFCSAFNLLDLLVVCVSLISYIFSSGAIS

>Locus\_12799\_Transcript\_1/4\_Confidence\_0.556\_Length\_2123|. |sp|  
Q24270|CAC1D\_DROME Voltage-dependent calcium channel type D subunit  
alpha-1 OS=Drosophila melanogaster GN=Ca-alpha1D PE=1 SV=2|e=0|  
from=1|to=2118|frame=1|Fragment\_7  
AINRAKGLKHVVQCVIVAVKTIGNIVLVTCLLQFMFAVIGVQLFKGKFFYCSDGSKMIES  
ECQGTYYVVFEDGDINKPEMRERIWIIRNKFHFDDVAKAMLTFTVSTFEGWPNNLLYVSIDS  
NNENVGPIHNYRP

>Locus\_12799\_Transcript\_1/4\_Confidence\_0.556\_Length\_2123|. |sp|  
Q24270|CAC1D\_DROME Voltage-dependent calcium channel type D subunit  
alpha-1 OS=Drosophila melanogaster GN=Ca-alpha1D PE=1 SV=2|e=0|  
from=1|to=2118|frame=1|Fragment\_8  
GFVIVTFQNEGEQEYKNCELDKNQNCIEFALKAKPVRRIYKQVWVWVTSQPFE  
YTIFILIMINTITLAMKFHRQPDMYTHALDVLNMIFTAFALEFVFKLAAFRFKNYFGDA  
WNVFDFIIVLGSFIDIVYSEV

>Locus\_12799\_Transcript\_1/4\_Confidence\_0.556\_Length\_2123|. |sp|  
Q24270|CAC1D\_DROME Voltage-dependent calcium channel type D subunit  
alpha-1 OS=Drosophila melanogaster GN=Ca-alpha1D PE=1 SV=2|  
e=1.08507E-17|from=844|to=1575|frame=1|Fragment\_1  
AFFILSQTNFRVFCWLCNHSYFGNIILVCIMFSSAMLAEDPLNAASER

>Locus\_12799\_Transcript\_1/4\_Confidence\_0.556\_Length\_2123|. |sp|  
Q24270|CAC1D\_DROME Voltage-dependent calcium channel type D subunit  
alpha-1 OS=Drosophila melanogaster GN=Ca-alpha1D PE=1 SV=2|  
e=1.08507E-17|from=844|to=1575|frame=1|Fragment\_2  
NQILNYFDYFFTGAFTVELLLKLVSYGFVLHKGAFCRSAFNLLDLLVVCVSLISYFSS

>Locus\_12799\_Transcript\_1/4\_Confidence\_0.556\_Length\_2123|. |sp|  
Q24270|CAC1D\_DROME Voltage-dependent calcium channel type D subunit  
alpha-1 OS=Drosophila melanogaster GN=Ca-alpha1D PE=1 SV=2|  
e=1.08507E-17|from=844|to=1575|frame=1|Fragment\_3  
GAIS

>Locus\_12799\_Transcript\_1/4\_Confidence\_0.556\_Length\_2123|. |sp|  
Q24270|CAC1D\_DROME Voltage-dependent calcium channel type D subunit  
alpha-1 OS=Drosophila melanogaster GN=Ca-alpha1D PE=1 SV=2|  
e=1.08507E-17|from=844|to=1575|frame=1|Fragment\_4  
AINRAKGLKHVVQCIVIVAVKTIGNIVLVTCLLQFMFAVIGVQLFKGKF

>Locus\_12799\_Transcript\_1/4\_Confidence\_0.556\_Length\_2123|. |sp|  
Q24270|CAC1D\_DROME Voltage-dependent calcium channel type D subunit  
alpha-1 OS=Drosophila melanogaster GN=Ca-alpha1D PE=1 SV=2|  
e=1.08507E-17|from=844|to=1575|frame=1|Fragment\_5  
FYCSDGSKMIESECQGTYYVFEDGDINKPEMRERIWIWIRNKFHFDDVAKAMLTFTVSTFE  
GWPNNLLY

>Locus\_15291\_Transcript\_2/3\_Confidence\_0.667\_Length\_2247|UNIGENE  
REPRESENTATIVE TRANSCRIPT|sp|Q24278|CNG\_DROME Cyclic nucleotide-  
gated cation channel OS=Drosophila melanogaster GN=Cng PE=2 SV=2|  
e=0|from=449|to=2233|frame=2|Fragment\_1  
ISDTPNQNIQDEESRASRWYQEFRTFISERILPKGSVKSAKAPDWFLDK

>Locus\_15291\_Transcript\_2/3\_Confidence\_0.667\_Length\_2247|UNIGENE  
REPRESENTATIVE TRANSCRIPT|sp|Q24278|CNG\_DROME Cyclic nucleotide-  
gated cation channel OS=Drosophila melanogaster GN=Cng PE=2 SV=2|  
e=0|from=449|to=2233|frame=2|Fragment\_2  
QDNKNQNN

>Locus\_15291\_Transcript\_2/3\_Confidence\_0.667\_Length\_2247|UNIGENE  
REPRESENTATIVE TRANSCRIPT|sp|Q24278|CNG\_DROME Cyclic nucleotide-  
gated cation channel OS=Drosophila melanogaster GN=Cng PE=2 SV=2|  
e=0|from=449|to=2233|frame=2|Fragment\_3  
EDATVICGYPLVVDTTLNHYRWLALVSLAVLYNIIFVVGRAVFEINNKIPAFWFTMDY  
FCDLIYWLDVAVHAHEGYLDQGLMVRDSSKLRSHYIASGSWRDLLSLLPTDIMYIWWQP  
STCQ

>Locus\_15291\_Transcript\_2/3\_Confidence\_0.667\_Length\_2247|UNIGENE  
REPRESENTATIVE TRANSCRIPT|sp|Q24278|CNG\_DROME Cyclic nucleotide-  
gated cation channel OS=Drosophila melanogaster GN=Cng PE=2 SV=2|  
e=0|from=449|to=2233|frame=2|Fragment\_4

LRVPCPVIVRLNRLLRAPRMWEWFDRTETATGYPNAFRICKVLIAILILIHWNACLYFAI  
SYGLGFGTDHWVYNLNGPRNSSLSRQYIYSFYWS  
>Locus\_15291\_Transcript\_2/3\_Confidence\_0.667\_Length\_2247|UNIGENE  
REPRESENTATIVE TRANSCRIPT|sp|Q24278|CNG\_DROME Cyclic nucleotide-  
gated cation channel OS=Drosophila melanogaster GN=Cng PE=2 SV=2|  
e=0|from=449|to=2233|frame=2|Fragment\_5  
NDAEYLFVVCDFLAGVLIFATIVGNIGSMISNMNVAKVDFQNRMDGVKQYMAFRKISGEL  
EARVIRWFAYTWSQSGALDEEKVLSALPDKLKAIEIAIVVHMETLRKVTIFQDCEPGLLEA  
LVLKLRQLQIFSPADYICRKGVDVGKEMYIVKR  
>Locus\_15291\_Transcript\_2/3\_Confidence\_0.667\_Length\_2247|UNIGENE  
REPRESENTATIVE TRANSCRIPT|sp|Q24278|CNG\_DROME Cyclic nucleotide-  
gated cation channel OS=Drosophila melanogaster GN=Cng PE=2 SV=2|  
e=0|from=449|to=2233|frame=2|Fragment\_6  
ATLSAGSVFGELSVLEISGNRTGNRRSANVKSLSGYSDFCLAKKDLWEVLENFQEAKEML  
IEKGVELLRKDGLLDEQALERSRRGKDSLKHEVDKLGQTVDSLGTARLARLMAECSAAQAK  
LKQRLTRLE  
>Locus\_15291\_Transcript\_3/3\_Confidence\_0.667\_Length\_2247|. |sp|  
Q24278|CNG\_DROME Cyclic nucleotide-gated cation channel  
OS=Drosophila melanogaster GN=Cng PE=2 SV=2|e=0|from=449|to=2233|  
frame=2|Fragment\_1  
ISDTPNQNIQDEESRASRWYQEFRTFISERILPKGSVKSAKAPDWFLDK  
>Locus\_15291\_Transcript\_3/3\_Confidence\_0.667\_Length\_2247|. |sp|  
Q24278|CNG\_DROME Cyclic nucleotide-gated cation channel  
OS=Drosophila melanogaster GN=Cng PE=2 SV=2|e=0|from=449|to=2233|  
frame=2|Fragment\_2  
QDNKNQNN  
>Locus\_15291\_Transcript\_3/3\_Confidence\_0.667\_Length\_2247|. |sp|  
Q24278|CNG\_DROME Cyclic nucleotide-gated cation channel  
OS=Drosophila melanogaster GN=Cng PE=2 SV=2|e=0|from=449|to=2233|  
frame=2|Fragment\_3  
EDATVICGYPLVVDTTLNSHYRWLALVSLAVLYNIIFVVGRAVFWWEINNKIPAFWFTMDY  
FCDLIYWLDVAVHAHEGYLDQGLMVRDSSKLRSHYIASGSWRDLDSLLPTDIMYIWWQP  
STCQ  
>Locus\_15291\_Transcript\_3/3\_Confidence\_0.667\_Length\_2247|. |sp|  
Q24278|CNG\_DROME Cyclic nucleotide-gated cation channel  
OS=Drosophila melanogaster GN=Cng PE=2 SV=2|e=0|from=449|to=2233|  
frame=2|Fragment\_4  
LRVPCPVIVRLNRLLRAPRMWEWFDRTETATGYPNAFRICKVLIAILILIHWNACLYFAI  
SYGLGFGTDHWVYNLNGPRNSSLSRQYIYSFYWS  
>Locus\_15291\_Transcript\_3/3\_Confidence\_0.667\_Length\_2247|. |sp|  
Q24278|CNG\_DROME Cyclic nucleotide-gated cation channel  
OS=Drosophila melanogaster GN=Cng PE=2 SV=2|e=0|from=449|to=2233|  
frame=2|Fragment\_5  
NDAEYLFVVCDFLAGVLIFATIVGNIGSMISNMNVAKVDFQNRMDGVKQYMAFRKISGEL  
EARVIRWFAYTWSQSGALDEEKVLSALPDKLKAIEIAIVVHMETLRKVTIFQDCEPGLLEA  
LVLKLRQLQIFSPADYICRKGVDVGKEMYIVKR  
>Locus\_15291\_Transcript\_3/3\_Confidence\_0.667\_Length\_2247|. |sp|  
Q24278|CNG\_DROME Cyclic nucleotide-gated cation channel  
OS=Drosophila melanogaster GN=Cng PE=2 SV=2|e=0|from=449|to=2233|  
frame=2|Fragment\_6  
ATLSAGSVFGELSVLEISGNRTGNRRSANVKSLSGYSDFCLAKKDLWEVLENFQEAKEML  
IEKGVELLRKDGLLDEQALERSRRGKDSLKHEVDKLGQTVDSLGTARLARLMAECSAAQAK  
LKQRLTRLE  
>Locus\_9542\_Transcript\_2/4\_Confidence\_0.700\_Length\_1254|UNIGENE

REPRESENTATIVE TRANSCRIPT|sp|Q24451|MAN2\_DROME Alpha-mannosidase 2  
OS=Drosophila melanogaster GN=alpha-Man-II PE=1 SV=2|e=2.67907E-76|  
from=1|to=1161|frame=1|Fragment\_1  
PYVKVYDSKDRPVHCQLSPVWLWSEGV  
>Locus\_9542\_Transcript\_2/4\_Confidence\_0.700\_Length\_1254|UNIGENE  
REPRESENTATIVE TRANSCRIPT|sp|Q24451|MAN2\_DROME Alpha-mannosidase 2  
OS=Drosophila melanogaster GN=alpha-Man-II PE=1 SV=2|e=2.67907E-76|  
from=1|to=1161|frame=1|Fragment\_2  
PQASPVRVYQLGCMIEVPALTLIALAVQAAEASDNGLPSFASVTLTLDENSVLHQVTS  
>Locus\_9542\_Transcript\_2/4\_Confidence\_0.700\_Length\_1254|UNIGENE  
REPRESENTATIVE TRANSCRIPT|sp|Q24451|MAN2\_DROME Alpha-mannosidase 2  
OS=Drosophila melanogaster GN=alpha-Man-II PE=1 SV=2|e=2.67907E-76|  
from=1|to=1161|frame=1|Fragment\_3  
ELGEYPGALTLQPQRDFTVDVALDSDGVVTQISIFASDGTLSITKPDDEP  
>Locus\_9542\_Transcript\_2/4\_Confidence\_0.700\_Length\_1254|UNIGENE  
REPRESENTATIVE TRANSCRIPT|sp|Q24451|MAN2\_DROME Alpha-mannosidase 2  
OS=Drosophila melanogaster GN=alpha-Man-II PE=1 SV=2|e=2.67907E-76|  
from=1|to=1161|frame=1|Fragment\_4  
MPIHLSFVKYGARKGGERSGAYLFLPDLPAQTVQNSLDSKSVVVIKGPLESRVQVNL  
PYVLHETIMRTIQSSEPRNEESTILEIRNLVDVANTHNAELAMRIATDISNKDEF  
FTDLNGLQMIRRKRFDKLPLQANYYPVPSAMFLQDETRRMTLISGQPLGGTSPRSGT  
LEIMQDRRLNQDDNRGLDQGVLDNKPVLNHF  
KLILE  
>Locus\_9542\_Transcript\_2/4\_Confidence\_0.700\_Length\_1254|UNIGENE  
REPRESENTATIVE TRANSCRIPT|sp|Q24451|MAN2\_DROME Alpha-mannosidase 2  
OS=Drosophila melanogaster GN=alpha-Man-II PE=1 SV=2|e=2.67907E-76|  
from=1|to=1161|frame=1|Fragment\_5  
TRKCAGEQHDEEPANPAGYLSKEALLQRDLMHYPIDKMLYSQDGW  
>Locus\_9542\_Transcript\_3/4\_Confidence\_0.700\_Length\_1254|. |sp|Q24451|  
MAN2\_DROME Alpha-mannosidase 2 OS=Drosophila melanogaster GN=alpha-  
Man-II PE=1 SV=2|e=2.67907E-76|from=1|to=1161|frame=1|Fragment\_1  
PYVKVYDSKDRPVHCQLSPVWLWSEGV  
>Locus\_9542\_Transcript\_3/4\_Confidence\_0.700\_Length\_1254|. |sp|Q24451|  
MAN2\_DROME Alpha-mannosidase 2 OS=Drosophila melanogaster GN=alpha-  
Man-II PE=1 SV=2|e=2.67907E-76|from=1|to=1161|frame=1|Fragment\_2  
PQASPVRVYQLGCMIEVPALTLIALAVQAAEASDNGLPSFASVTLTLDENSVLHQVTS  
>Locus\_9542\_Transcript\_3/4\_Confidence\_0.700\_Length\_1254|. |sp|Q24451|  
MAN2\_DROME Alpha-mannosidase 2 OS=Drosophila melanogaster GN=alpha-  
Man-II PE=1 SV=2|e=2.67907E-76|from=1|to=1161|frame=1|Fragment\_3  
ELGEYPGALTLQPQRDFTVDVALDSDGVVTQISIFASDGTLSITKPDDEP  
>Locus\_9542\_Transcript\_3/4\_Confidence\_0.700\_Length\_1254|. |sp|Q24451|  
MAN2\_DROME Alpha-mannosidase 2 OS=Drosophila melanogaster GN=alpha-  
Man-II PE=1 SV=2|e=2.67907E-76|from=1|to=1161|frame=1|Fragment\_4  
MPIHLSFVKYGARKGGERSGAYLFLPDLPAQTVQNSLDSKSVVVIKGPLESRVQVNL  
PYVLHETIMRIIQSSEPRNEESTILEIRNLVDVANTHNAELAMRIATDISNKDEF  
FTDLNGLQMIRRKRFDKLPLQANYYPVPSAMFLQDETRRMTLISGQPLGGTSPRSGT  
LEIMQDRRLNQDDNRGLDQGVLDNKPVLNHF  
KLILE  
>Locus\_9542\_Transcript\_3/4\_Confidence\_0.700\_Length\_1254|. |sp|Q24451|  
MAN2\_DROME Alpha-mannosidase 2 OS=Drosophila melanogaster GN=alpha-  
Man-II PE=1 SV=2|e=2.67907E-76|from=1|to=1161|frame=1|Fragment\_5  
TRKCAGEQHDEEPANPAGYLSKEALLQRDLMHYPIDKMLYSQDGW  
>Locus\_9542\_Transcript\_4/4\_Confidence\_0.700\_Length\_1254|. |sp|Q24451|  
MAN2\_DROME Alpha-mannosidase 2 OS=Drosophila melanogaster GN=alpha-  
Man-II PE=1 SV=2|e=2.67907E-76|from=1|to=1161|frame=1|Fragment\_1  
PYVKVYDSKDRPVHCQLSPVWLWSEGV

>Locus\_9542\_Transcript\_4/4\_Confidence\_0.700\_Length\_1254|. |sp|Q24451|  
MAN2\_DROME Alpha-mannosidase 2 OS=Drosophila melanogaster GN=alpha-  
Man-II PE=1 SV=2|e=2.67907E-76|from=1|to=1161|frame=1|Fragment\_2  
PQASPVRYQLGCMIEVPALTLIALAVQAAEASDNGLPSFASVTLTLDENSVLHQVTS  
>Locus\_9542\_Transcript\_4/4\_Confidence\_0.700\_Length\_1254|. |sp|Q24451|  
MAN2\_DROME Alpha-mannosidase 2 OS=Drosophila melanogaster GN=alpha-  
Man-II PE=1 SV=2|e=2.67907E-76|from=1|to=1161|frame=1|Fragment\_3  
ELGEYPGALTLPQRDFTVDVALDSDGVVTQSSIFASDGTLSITKPDDEP  
>Locus\_9542\_Transcript\_4/4\_Confidence\_0.700\_Length\_1254|. |sp|Q24451|  
MAN2\_DROME Alpha-mannosidase 2 OS=Drosophila melanogaster GN=alpha-  
Man-II PE=1 SV=2|e=2.67907E-76|from=1|to=1161|frame=1|Fragment\_4  
MPIHLSFVKYGARKGGERSGAYLFLPDLPQTVQNSLDSKSVVVIKGPLESRVQVNL  
PY VLHETIMRTIQSSEPRNEESTILEIRNLVDVANTHNAELAMRIATDISNKDEF  
FTDLNGL QMIRRKRFDKLPLQANYYPVPSAMFLQDETRRMTLISGQPLGGTSPRSGTLEIMQDRRLN  
QDDNRGLDQGVLDNKPVLNHFKLILE  
>Locus\_9542\_Transcript\_4/4\_Confidence\_0.700\_Length\_1254|. |sp|Q24451|  
MAN2\_DROME Alpha-mannosidase 2 OS=Drosophila melanogaster GN=alpha-  
Man-II PE=1 SV=2|e=2.67907E-76|from=1|to=1161|frame=1|Fragment\_5  
TRKCAGEQHDEEPANPAGYLSKEALLQRDLMHYPIDKMLYSQDGW  
>Locus\_9542\_Transcript\_1/4\_Confidence\_0.700\_Length\_1254|. |sp|Q24451|  
MAN2\_DROME Alpha-mannosidase 2 OS=Drosophila melanogaster GN=alpha-  
Man-II PE=1 SV=2|e=2.26797E-75|from=1|to=1161|frame=1|Fragment\_1  
PYVKVYDSKDRPVHCQLSPVWLWSEGV  
>Locus\_9542\_Transcript\_1/4\_Confidence\_0.700\_Length\_1254|. |sp|Q24451|  
MAN2\_DROME Alpha-mannosidase 2 OS=Drosophila melanogaster GN=alpha-  
Man-II PE=1 SV=2|e=2.26797E-75|from=1|to=1161|frame=1|Fragment\_2  
PQASPVRYQLGCMIEVSALTLIALAVQAAEASDNGLPSFASVTLTLDENSVLHQVTS  
>Locus\_9542\_Transcript\_1/4\_Confidence\_0.700\_Length\_1254|. |sp|Q24451|  
MAN2\_DROME Alpha-mannosidase 2 OS=Drosophila melanogaster GN=alpha-  
Man-II PE=1 SV=2|e=2.26797E-75|from=1|to=1161|frame=1|Fragment\_3  
ELGEYPGALTLPQRDFTVDVALDSDGVVTQSSIFASDGTLSITKPDDEP  
>Locus\_9542\_Transcript\_1/4\_Confidence\_0.700\_Length\_1254|. |sp|Q24451|  
MAN2\_DROME Alpha-mannosidase 2 OS=Drosophila melanogaster GN=alpha-  
Man-II PE=1 SV=2|e=2.26797E-75|from=1|to=1161|frame=1|Fragment\_4  
MPIHLSFVKYGARKGGERSGAYLFLPDLPQTVQNSLDSKSVVVIKGPLESRVQVNL  
PY VLHETIMRTIQSSEPRNEESTILEIRNLVDVANTHNAELAMRIATDISNKDEF  
FTDLNGL QMIRRKRFDKLPLQANYYPVPSAMFLQDETRRMTLISGQPLGGTSPRSGTLEIMQDRRLN  
QDDNRGLDQGVLDNKPVLNHFKLILE  
>Locus\_9542\_Transcript\_1/4\_Confidence\_0.700\_Length\_1254|. |sp|Q24451|  
MAN2\_DROME Alpha-mannosidase 2 OS=Drosophila melanogaster GN=alpha-  
Man-II PE=1 SV=2|e=2.26797E-75|from=1|to=1161|frame=1|Fragment\_5  
TRKCAGEQHDEEPANPAGYLSKEALLQRDLMHYPIDKMLYSQDGW  
>Locus\_10403\_Transcript\_1/3\_Confidence\_0.667\_Length\_3725|UNIGENE  
REPRESENTATIVE TRANSCRIPT|sp|Q24498|RY44\_DROME Ryanodine receptor  
44F OS=Drosophila melanogaster GN=Rya-r44F PE=1 SV=3|e=0|from=3|  
to=3578|frame=-1|Fragment\_1  
MAEAEGGSEQDDVSFLRTEDMVCLSCSTATGERVCLAAEGFGNRHCFLNIADKNIPDLS  
QCVFVIEQALSVRALQELV  
>Locus\_10403\_Transcript\_1/3\_Confidence\_0.667\_Length\_3725|UNIGENE  
REPRESENTATIVE TRANSCRIPT|sp|Q24498|RY44\_DROME Ryanodine receptor  
44F OS=Drosophila melanogaster GN=Rya-r44F PE=1 SV=3|e=0|from=3|  
to=3578|frame=-1|Fragment\_2  
GHRTLLYGNAILLRHQNSDMYLACLSTSSSNDKLSFDVGLQEHSKGEACWWTVHPASKQR  
SEGEKVRVGGDDLILVSVATERYLHTTKENDLSVNVASFHVTHWSVQPYGTGISKMKYVGY

VFGGDVLRFFHGGDECLTIPSTWSETLGNIVVYEGGSVMSQARSLWRLELARTKWAGGF  
INWYHPMRIRHITTGRYLGVNENNELYLVRREEATTASTAFCLRQEKDDQKVLEDKLE  
VIGSPIIKYGDSTVIMQHSEGLWLSYKSYET  
>Locus\_10403\_Transcript\_1/3\_Confidence\_0.667\_Length\_3725|UNIGENE  
REPRESENTATIVE TRANSCRIPT|sp|Q24498|RY44\_DROME Ryanodine receptor  
44F OS=Drosophila melanogaster GN=Rya-r44F PE=1 SV=3|e=0|from=3|  
to=3578|frame=-1|Fragment\_3  
KQAILHEEGKMDDGLDFSRSQEEESRTARVIRKCSSLFTKFINGLETQTNRHSLFFAS  
VNLSEMVMCLEDLINYFAQPDEEMEHEEKQNRFRALRNRQDLFQEEGILNLILEAIDKIN  
VITSQGFLAGFLAGDDAGQSWEMISGYLYQLLAAIIKGNHTNCAQFANSNRLNWLFSRLG  
SQASSEGTGMLDVLHCVLID SPEALNMMRDEHIKVIISLLEKHGRDPKVLVDVLCSLCVGN  
GVAVRSSQNNICDFLLPGKNLLLQTQLVDHVASIRPNIFVGKVEGSAVYQKWYFEVTMDH  
LEQTTMMPHLRIGWANTTGYVPYP  
>Locus\_10403\_Transcript\_1/3\_Confidence\_0.667\_Length\_3725|UNIGENE  
REPRESENTATIVE TRANSCRIPT|sp|Q24498|RY44\_DROME Ryanodine receptor  
44F OS=Drosophila melanogaster GN=Rya-r44F PE=1 SV=3|e=0|from=3|  
to=3578|frame=-1|Fragment\_4  
GDDLVSFGFDGAYLWTGGRKSLVLP  
>Locus\_10403\_Transcript\_1/3\_Confidence\_0.667\_Length\_3725|UNIGENE  
REPRESENTATIVE TRANSCRIPT|sp|Q24498|RY44\_DROME Ryanodine receptor  
44F OS=Drosophila melanogaster GN=Rya-r44F PE=1 SV=3|e=0|from=3|  
to=3578|frame=-1|Fragment\_5  
AEEPYIRKGDVVGALDLSIPLITFTMNGMRIHGSFTDFNLDGMFHPVMSCSSKLSRFL  
LGGDHGRLKYAPPEGFSPLECLQPQQILSLDPCFYFGNLNKSVLGAPWLVEDDTAFVPK  
PVDTTSTMPYSYVETIRDKLAENIHEMWALNKVESGWCWGERRDDVHKIHPCLTQFDNLP  
AAEKYDSQLAIQTLKTIIALGYIISMDKPPARIRQIRLPNEPFLQANGYKPAPLDLSAV  
TLTPKMDLVDQLAENTHNLWAKERIQGWTYGLNEDSDNLRSPHLVPYAKVDEAIKKAN  
RDTASETVRTLLVYGYNLEPPQGEANEALLAEHRLRHSGFRTYRVEKTYAVTSGKWYFE  
FEILTAGPMRVGWARSDCPPGQMLGQDEYTWAFDGYNEEKVFSGNAESFGKQWAVGDVVG  
VFLDLIDHTISFSLNGELLM DALGGETSFADVQEG  
>Locus\_10403\_Transcript\_3/3\_Confidence\_0.667\_Length\_3725|. |sp|  
Q24498|RY44\_DROME Ryanodine receptor 44F OS=Drosophila melanogaster  
GN=Rya-r44F PE=1 SV=3|e=0|from=3|to=3578|frame=-1|Fragment\_1  
MAEAEGGSEQDDVSFLRTEDMVCLSCATGERVCLAAEGFGRHCFLENIADKNIPDLS  
QCVFVIEQALSVRALQELV  
>Locus\_10403\_Transcript\_3/3\_Confidence\_0.667\_Length\_3725|. |sp|  
Q24498|RY44\_DROME Ryanodine receptor 44F OS=Drosophila melanogaster  
GN=Rya-r44F PE=1 SV=3|e=0|from=3|to=3578|frame=-1|Fragment\_2  
GHRTLLYGNAILLRHQNSD MYLACLSTSSNDKLSFDVGLQEHSKGEACWWTVHPASKQR  
SEGEKVRVGDLLILSVATERYLHTTKENDLSVNASFHVTHWSVQPYGTGISKMKYVGY  
VFGGDVLRFFHGGDECLTIPSTWSETLGNIVVYEGGSVMSQARSLWRLELARTKWAGGF  
INWYHPMRIRHITTGRYLGVNENNELYLVRREEATTASTAFCLRQEKDDQKVLEDKLE  
VIGSPIIKYGDSTVIMQHSEGLWLSYKSYET  
>Locus\_10403\_Transcript\_3/3\_Confidence\_0.667\_Length\_3725|. |sp|  
Q24498|RY44\_DROME Ryanodine receptor 44F OS=Drosophila melanogaster  
GN=Rya-r44F PE=1 SV=3|e=0|from=3|to=3578|frame=-1|Fragment\_3  
KQAILHEEGKMDDGLDFSRSQEEESRTARVIRKCSSLFTKFINGLETQTNRHSLFFAS  
VNLSEMVMCLEDLINYFAQPDEEMEHEEKQNRFRALRNRQDLFQEEGILNLILEAIDKIN  
VITSQGFLAGFLAGDDAGQSWEMISGYLYQLLAAIIKGNHTNCAQFANSNRLNWLFSRLG  
SQASSEGTGMLDVLHCVLID SPEALNMMRDEHIKVIISLLEKHGRDPKVLVDVLCSLCVGN  
GVAVRSSQNNICDFLLPGKNLLLQTQLVDHVASIRPNIFVGKVEGSAVYQKWYFEVTMDH  
LEQTTMMPHLRIGWANTTGYVPYP  
>Locus\_10403\_Transcript\_3/3\_Confidence\_0.667\_Length\_3725|. |sp|  
Q24498|RY44\_DROME Ryanodine receptor 44F OS=Drosophila melanogaster

GN=Rya-r44F PE=1 SV=3|e=0|from=3|to=3578|frame=-1|Fragment\_4  
GDDLVSFGFDGAYLWTGGRKSLVLP  
>Locus\_10403\_Transcript\_3/3\_Confidence\_0.667\_Length\_3725|. |sp|  
Q24498|RY44\_DROME Ryanodine receptor 44F OS=Drosophila melanogaster  
GN=Rya-r44F PE=1 SV=3|e=0|from=3|to=3578|frame=-1|Fragment\_5  
AEPYIRKGDVVCALDLSIPLITFTMNGMRIHGSFTDFNLDGMFHPVMSCSSKLSRFL  
LGGDHGRLKYAPPEGFSPLECLQPQQILSLDPCFYFGNLNKSVLGPWLVEDDTAFVPK  
PVDTTSVTMPSTYVETIRDKLAENIHEMWALNKVESGWCWGERRDDVHKIHPCLTQFDNLP  
AAEKKYDSQLAIQTLKTIIALGYYISMDKPPARIRQIRLPNEPFLQANGYKPAPLDLSAV  
TLTPKMDELVDQLAENTHNLWAKERIQQGWTYGLNEDSDNLRSPHLVPYAKVDEAIKKAN  
RDTASETVRTLLVYGYNLEPPQGEANEALLAEHRLRHSGFRTYRVEKTYAVTSGKWYFE  
FEILTAGPMRVGWARSDCPPGQMLGQDEYTWAFDGYNEEKVFSGNAESFGKQWAVGDVVG  
VFLDLIDHTISFSLNGELLMDALGGETSFADVQEG  
>Locus\_10403\_Transcript\_1/3\_Confidence\_0.667\_Length\_3725|. |sp|  
Q24498|RY44\_DROME Ryanodine receptor 44F OS=Drosophila melanogaster  
GN=Rya-r44F PE=1 SV=3|e=2.08974E-22|from=408|to=1034|frame=-1|  
Fragment\_1  
DDTAFVPPKPVDTTSTMPSTYVETIRDKLAENIHEMWALNKVESGWCWGERRDDVHKIHP  
LTQFDNLPAAEKKYDSQLAIQTLKTIIALGYYIS  
>Locus\_10403\_Transcript\_1/3\_Confidence\_0.667\_Length\_3725|. |sp|  
Q24498|RY44\_DROME Ryanodine receptor 44F OS=Drosophila melanogaster  
GN=Rya-r44F PE=1 SV=3|e=2.08974E-22|from=408|to=1034|frame=-1|  
Fragment\_2  
MDKPPARIRQIRLPNEPFLQANGYKPAPLDLSAVTLTPKMDELVDQLAENTHNLWAKERI  
QQGWTYGLNEDSDNLRSPHLVPYAKVDEAIKKANRDTASETVRTLLVYGYNLEPP  
>Locus\_10403\_Transcript\_3/3\_Confidence\_0.667\_Length\_3725|. |sp|  
Q24498|RY44\_DROME Ryanodine receptor 44F OS=Drosophila melanogaster  
GN=Rya-r44F PE=1 SV=3|e=2.08974E-22|from=408|to=1034|frame=-1|  
Fragment\_1  
DDTAFVPPKPVDTTSTMPSTYVETIRDKLAENIHEMWALNKVESGWCWGERRDDVHKIHP  
LTQFDNLPAAEKKYDSQLAIQTLKTIIALGYYIS  
>Locus\_10403\_Transcript\_3/3\_Confidence\_0.667\_Length\_3725|. |sp|  
Q24498|RY44\_DROME Ryanodine receptor 44F OS=Drosophila melanogaster  
GN=Rya-r44F PE=1 SV=3|e=2.08974E-22|from=408|to=1034|frame=-1|  
Fragment\_2  
MDKPPARIRQIRLPNEPFLQANGYKPAPLDLSAVTLTPKMDELVDQLAENTHNLWAKERI  
QQGWTYGLNEDSDNLRSPHLVPYAKVDEAIKKANRDTASETVRTLLVYGYNLEPP  
>Locus\_10403\_Transcript\_1/3\_Confidence\_0.667\_Length\_3725|. |sp|  
Q24498|RY44\_DROME Ryanodine receptor 44F OS=Drosophila melanogaster  
GN=Rya-r44F PE=1 SV=3|e=4.36749E-12|from=399|to=845|frame=-1|  
Fragment\_1  
FDNLPAAEKKYDSQLAIQTLKTIIALGYYISMDKPPARI  
>Locus\_10403\_Transcript\_1/3\_Confidence\_0.667\_Length\_3725|. |sp|  
Q24498|RY44\_DROME Ryanodine receptor 44F OS=Drosophila melanogaster  
GN=Rya-r44F PE=1 SV=3|e=4.36749E-12|from=399|to=845|frame=-1|  
Fragment\_2  
RQIRLPNEPFLQANGYKPAPLDLSAVTLTPKMDELVDQLAENTHNLWAKERIQQGWTYGL  
NEDSDNLRSPHLVPYAKVDEAIKKANRDTASETVRTLLVYGYNLEPPQGE  
>Locus\_10403\_Transcript\_3/3\_Confidence\_0.667\_Length\_3725|. |sp|  
Q24498|RY44\_DROME Ryanodine receptor 44F OS=Drosophila melanogaster  
GN=Rya-r44F PE=1 SV=3|e=4.36749E-12|from=399|to=845|frame=-1|  
Fragment\_1  
FDNLPAAEKKYDSQLAIQTLKTIIALGYYISMDKPPARI  
>Locus\_10403\_Transcript\_3/3\_Confidence\_0.667\_Length\_3725|. |sp|

Q24498|RY44\_DROME Ryanodine receptor 44F OS=Drosophila melanogaster  
GN=Rya-r44F PE=1 SV=3|e=4.36749E-12|from=399|to=845|frame=-1|  
Fragment\_2  
RQIRLPNEPFLQANGYKPAPLDLSAVTLTPKMDELVDQLAENTHNLWAKERIQQGWTYGL  
NEDSDNLRSPHLVPYAKVDEAIIKANRDTASETVRTLLVYGYNLEPPQGE  
>Locus\_10403\_Transcript\_2/3\_Confidence\_0.333\_Length\_2537|. |sp|  
Q24498|RY44\_DROME Ryanodine receptor 44F OS=Drosophila melanogaster  
GN=Rya-r44F PE=1 SV=3|e=0|from=3|to=2537|frame=-1|Fragment\_1  
MQHSEGLWLSYKSYET  
>Locus\_10403\_Transcript\_2/3\_Confidence\_0.333\_Length\_2537|. |sp|  
Q24498|RY44\_DROME Ryanodine receptor 44F OS=Drosophila melanogaster  
GN=Rya-r44F PE=1 SV=3|e=0|from=3|to=2537|frame=-1|Fragment\_2  
KQAILHEEGKMDDGLDFSRSQEEESRTARVIRKCSSLFTKFINLETQTNRHSLFFAS  
VNLSEVMCLEDLINYFAQPDEEMEHEEKQNRFRALNRQDLFQEEGILNLI LEAIDKIN  
VITSQGLAGFLAGDDAGQSWEMISGYLYQLLAAIIKGNHTNCAQFANSNRLNWLFSRLG  
SQASSEGTGMLDVLHCVLIDSPEALNMMRDEHIKVIISLLEKHGRDPKVLVDVLCSLCVGN  
GVAVRSSQNNICDFLLPGKNLLLQTLVDHVASIRPNIFVGKVEGSAVYQKWYFEVTMDH  
LEQTTHMMPHLRIGWANTTGYVPYP  
>Locus\_10403\_Transcript\_2/3\_Confidence\_0.333\_Length\_2537|. |sp|  
Q24498|RY44\_DROME Ryanodine receptor 44F OS=Drosophila melanogaster  
GN=Rya-r44F PE=1 SV=3|e=0|from=3|to=2537|frame=-1|Fragment\_3  
GDDLVSFGFDGAYLWTGGRKSLVLPGA  
>Locus\_10403\_Transcript\_2/3\_Confidence\_0.333\_Length\_2537|. |sp|  
Q24498|RY44\_DROME Ryanodine receptor 44F OS=Drosophila melanogaster  
GN=Rya-r44F PE=1 SV=3|e=0|from=3|to=2537|frame=-1|Fragment\_4  
EOPYIRKGDVVGALDLSIPLITFTMNGMRIHGSFTDFNLDGMFHPVMSCSSKLSRFL  
GGDHGRLKYAPPEGFSPLVECLQPQIILSLDPCFYFGNLNKSVLGAPWLVEDDTAFVPKP  
VDTTSVTMPSYVETIRDKLAENIHEMWALNKVESGWCWGERRDDVHKIHPCLTQFDNLPA  
AEKKYDSQLAIQTLKTIIALGYYISMDKPPARIRQIRLPNEPFLQANGYKPAPLDLSAVT  
LTPKMDELVDQLAENTHNLWAKERIQQGWTYGLNEDSDNLRSPHLVPYAKVDEAIIKANR  
DTASETVRTLLVYGYNLEPPQGEANEALLAEAHRLRHSGFRTYRVEKTYAVTSGKWYFEF  
EILTAGPMRVGWARSDCPPGQMLGQDEYTWAFDGYNEEKVFSGNAESFGKQWAVGDVVGV  
FLDLIDHTISFSLNGELLM DALGGGETSFADVQGEG  
>Locus\_10403\_Transcript\_2/3\_Confidence\_0.333\_Length\_2537|. |sp|  
Q24498|RY44\_DROME Ryanodine receptor 44F OS=Drosophila melanogaster  
GN=Rya-r44F PE=1 SV=3|e=1.36942E-22|from=408|to=1034|frame=-1|  
Fragment\_1  
DDTAFVPKPVDTTSVTMPSYVETIRDKLAENIHEMWALNKVESGWCWGERRDDVHKIHP  
LTQFDNLPAEKKYDSQLAIQTLKTIIALGYYIS  
>Locus\_10403\_Transcript\_2/3\_Confidence\_0.333\_Length\_2537|. |sp|  
Q24498|RY44\_DROME Ryanodine receptor 44F OS=Drosophila melanogaster  
GN=Rya-r44F PE=1 SV=3|e=1.36942E-22|from=408|to=1034|frame=-1|  
Fragment\_2  
MDKPPARIRQIRLPNEPFLQANGYKPAPLDLSAVTLTPKMDELVDQLAENTHNLWAKERI  
QQGWTYGLNEDSDNLRSPHLVPYAKVDEAIIKANRDTASETVRTLLVYGYNLEPP  
>Locus\_10403\_Transcript\_2/3\_Confidence\_0.333\_Length\_2537|. |sp|  
Q24498|RY44\_DROME Ryanodine receptor 44F OS=Drosophila melanogaster  
GN=Rya-r44F PE=1 SV=3|e=2.86205E-12|from=399|to=845|frame=-1|  
Fragment\_1  
FDNLPAEKKYDSQLAIQTLKTIIALGYYISMDKPPARI  
>Locus\_10403\_Transcript\_2/3\_Confidence\_0.333\_Length\_2537|. |sp|  
Q24498|RY44\_DROME Ryanodine receptor 44F OS=Drosophila melanogaster  
GN=Rya-r44F PE=1 SV=3|e=2.86205E-12|from=399|to=845|frame=-1|  
Fragment\_2

RQIRLPNEPFLQANGYKPAPLDLSAVTLTPKMDDELVDQLAENTHNLWAKERIQQGWTYGL  
NEDSDNLRSPHLVPYAKVDEAIKKANRDTASETVRTLLVYGYNLEPPQGE  
>Locus\_29700\_Transcript\_1/1\_Confidence\_1.000\_Length\_286|. |sp|Q24498|  
RY44\_DROME Ryanodine receptor 44F OS=Drosophila melanogaster GN=Rya-  
r44F PE=1 SV=3|e=5.87161E-44|from=1|to=285|frame=-2|Fragment\_1  
GMFVGC FVDTATGCITFTCEGKETSHKWHMEPETKLFPAIFVEATSKDMLQIELGRTATT  
LPLSAAVLPTGDKHAIPQFPRLK VQCLKPHQWAR  
>Locus\_2665\_Transcript\_4/20\_Confidence\_1.000\_Length\_248|. |sp|Q24498|  
RY44\_DROME Ryanodine receptor 44F OS=Drosophila melanogaster GN=Rya-  
r44F PE=1 SV=3|e=2.17728E-14|from=3|to=248|frame=-1|Fragment\_1  
SLSALQEPEPEE  
>Locus\_2665\_Transcript\_4/20\_Confidence\_1.000\_Length\_248|. |sp|Q24498|  
RY44\_DROME Ryanodine receptor 44F OS=Drosophila melanogaster GN=Rya-  
r44F PE=1 SV=3|e=2.17728E-14|from=3|to=248|frame=-1|Fragment\_2  
PAVDESRTGKIKKLFNFINTV  
>Locus\_2665\_Transcript\_4/20\_Confidence\_1.000\_Length\_248|. |sp|Q24498|  
RY44\_DROME Ryanodine receptor 44F OS=Drosophila melanogaster GN=Rya-  
r44F PE=1 SV=3|e=2.17728E-14|from=3|to=248|frame=-1|Fragment\_3  
EIFRKVLISTIVSWAEESQIETPKLVREM  
>Locus\_10437\_Transcript\_1/2\_Confidence\_0.750\_Length\_2925|UNIGENE  
REPRESENTATIVE TRANSCRIPT|sp|Q26972|SEM1A\_TRICF Semaphorin-1A  
OS=Tribolium confusum GN=SEMA-1A PE=2 SV=1|e=6.1121E-131|from=20|  
to=2296|frame=2|Fragment\_1  
SFNNLNLDKDTKQYFKLLQHETQDSILVGARNAVYNLSLPDLIENKNQRIEWPSSGAHRE  
LCYLKKGKSEIDCQNYIRIGALDTSNALLVCGTNSFKPLCRRYR  
>Locus\_10437\_Transcript\_1/2\_Confidence\_0.750\_Length\_2925|UNIGENE  
REPRESENTATIVE TRANSCRIPT|sp|Q26972|SEM1A\_TRICF Semaphorin-1A  
OS=Tribolium confusum GN=SEMA-1A PE=2 SV=1|e=6.1121E-131|from=20|  
to=2296|frame=2|Fragment\_2  
PQTNITASSEAQASKLHEQFEGIGVCPYDPTHNSTAIYADGALFSATAADFSGGDPLIYR  
SPQRTERYDLRQLNDPAFVGSVTYGEHVYVFFRETAVEHMNCGKVVSRYVGRICASDRGG  
PRHFGDRWTSFVKARLNCVAGDYPFYFDEVQAVSGPHKGV RAGGVESSVVYLVATTAPS  
AIGGS AVCAFMDHVAKLFDTASFKHQPHGINSNW  
>Locus\_10437\_Transcript\_1/2\_Confidence\_0.750\_Length\_2925|UNIGENE  
REPRESENTATIVE TRANSCRIPT|sp|Q26972|SEM1A\_TRICF Semaphorin-1A  
OS=Tribolium confusum GN=SEMA-1A PE=2 SV=1|e=6.1121E-131|from=20|  
to=2296|frame=2|Fragment\_3  
GSCLEDSRTLSDNVNFIRAHSLDPAIPGLTRHPLITRVSLSHRMSSIAVQPQIRALND  
KTYDMLYIGTDDGRVLQALNTALAVSLNASNPILVSEWQLA  
>Locus\_10437\_Transcript\_1/2\_Confidence\_0.750\_Length\_2925|UNIGENE  
REPRESENTATIVE TRANSCRIPT|sp|Q26972|SEM1A\_TRICF Semaphorin-1A  
OS=Tribolium confusum GN=SEMA-1A PE=2 SV=1|e=6.1121E-131|from=20|  
to=2296|frame=2|Fragment\_4  
PQGEPIRELRMAGAANNRFLVAVTDERVLAADTRFVCKSASNCRECLQLRNPECA YDRRN  
QMCISLQDHPYPNKERFLQSLDPEDYQSVANS DAELCKKSQTWPGVPASRRRPDANKGRD  
ETGHS GDGSGENKRISSE  
>Locus\_10437\_Transcript\_1/2\_Confidence\_0.750\_Length\_2925|UNIGENE  
REPRESENTATIVE TRANSCRIPT|sp|Q26972|SEM1A\_TRICF Semaphorin-1A  
OS=Tribolium confusum GN=SEMA-1A PE=2 SV=1|e=6.1121E-131|from=20|  
to=2296|frame=2|Fragment\_5  
LDNEIVIELVGSRALA  
>Locus\_10437\_Transcript\_1/2\_Confidence\_0.750\_Length\_2925|UNIGENE  
REPRESENTATIVE TRANSCRIPT|sp|Q26972|SEM1A\_TRICF Semaphorin-1A  
OS=Tribolium confusum GN=SEMA-1A PE=2 SV=1|e=6.1121E-131|from=20|

to=2296|frame=2|Fragment\_6  
IGAVHPDVGAIKYSSGTMHSVIISSLLTLVCGFALGFLFSRRMR  
>Locus\_10437\_Transcript\_1/2\_Confidence\_0.750\_Length\_2925|UNIGENE  
REPRESENTATIVE TRANSCRIPT|sp|Q26972|SEM1A\_TRICF Semaphorin-1A  
OS=Tribolium confusum GN=SEMA-1A PE=2 SV=1|e=6.1121E-131|from=20|  
to=2296|frame=2|Fragment\_7  
YHRQGPYGDQHNHRHLESNFSTSAQCSQY  
>Locus\_10437\_Transcript\_1/2\_Confidence\_0.750\_Length\_2925|UNIGENE  
REPRESENTATIVE TRANSCRIPT|sp|Q26972|SEM1A\_TRICF Semaphorin-1A  
OS=Tribolium confusum GN=SEMA-1A PE=2 SV=1|e=6.1121E-131|from=20|  
to=2296|frame=2|Fragment\_8  
LLKNVPTCEKQDNLQHELAKHHELKNSTESLDRMGTLQKAKKTYI  
>Locus\_10437\_Transcript\_2/2\_Confidence\_0.750\_Length\_2925|. |sp|  
Q26972|SEM1A\_TRICF Semaphorin-1A OS=Tribolium confusum GN=SEMA-1A  
PE=2 SV=1|e=6.1121E-131|from=20|to=2296|frame=2|Fragment\_1  
SFNNLNLDKDTKQYFKLLQHETQDSILVGARNAVYNLSLPDLIENKNQRIEWPSSGAHRE  
LCYLKKGKSEIDCQNYIRIGALDTSNALLVCGTNSFKPLCRRYR  
>Locus\_10437\_Transcript\_2/2\_Confidence\_0.750\_Length\_2925|. |sp|  
Q26972|SEM1A\_TRICF Semaphorin-1A OS=Tribolium confusum GN=SEMA-1A  
PE=2 SV=1|e=6.1121E-131|from=20|to=2296|frame=2|Fragment\_2  
PQTNITASSEAQASKLHEQFEGIGVCPYDPTHNSTAIYADGALFSATAADFSGGDPLIYR  
SPQRTERYDLRQLNDPAFVGSVTYGEHVYVFFRETAVEHMNCGKVVSRSRGRICASDRGG  
PRHFGDRWTSFVKARLNCVAGDYPFYFDEVQAVSGPHKGV RAGGVESVYLVATTAPS  
AIGGSAVCAFDMDHVAKLFDTASFHKHQP HGINSNL  
>Locus\_10437\_Transcript\_2/2\_Confidence\_0.750\_Length\_2925|. |sp|  
Q26972|SEM1A\_TRICF Semaphorin-1A OS=Tribolium confusum GN=SEMA-1A  
PE=2 SV=1|e=6.1121E-131|from=20|to=2296|frame=2|Fragment\_3  
GSCLEDSRTLSDNNVNFIRAHSLLDPAIPGLTRHPLITRVSLSHRMSSIAVQPQIRALND  
KTYDMLYIGTDDGRVLQALNTALAVSLNASNPILVSEWQLA  
>Locus\_10437\_Transcript\_2/2\_Confidence\_0.750\_Length\_2925|. |sp|  
Q26972|SEM1A\_TRICF Semaphorin-1A OS=Tribolium confusum GN=SEMA-1A  
PE=2 SV=1|e=6.1121E-131|from=20|to=2296|frame=2|Fragment\_4  
PQGEPIRELRMAGAANNRFLVAVTDERVLAADTRFVCKSASNCRECLQLRNPECAYDRRN  
QMCISLQDHPYPNKERFLQSLDPEDYQSVANSDAELCKKSQTWPGVPASRRRPDANKGRD  
ETGHS GDGSGENKRISSE  
>Locus\_10437\_Transcript\_2/2\_Confidence\_0.750\_Length\_2925|. |sp|  
Q26972|SEM1A\_TRICF Semaphorin-1A OS=Tribolium confusum GN=SEMA-1A  
PE=2 SV=1|e=6.1121E-131|from=20|to=2296|frame=2|Fragment\_5  
LDNEIVIELVGSRALA  
>Locus\_10437\_Transcript\_2/2\_Confidence\_0.750\_Length\_2925|. |sp|  
Q26972|SEM1A\_TRICF Semaphorin-1A OS=Tribolium confusum GN=SEMA-1A  
PE=2 SV=1|e=6.1121E-131|from=20|to=2296|frame=2|Fragment\_6  
IGAVHPDVGAIKYSSGTMHSVIISSLLTLVCGFALGFLFSRRMR  
>Locus\_10437\_Transcript\_2/2\_Confidence\_0.750\_Length\_2925|. |sp|  
Q26972|SEM1A\_TRICF Semaphorin-1A OS=Tribolium confusum GN=SEMA-1A  
PE=2 SV=1|e=6.1121E-131|from=20|to=2296|frame=2|Fragment\_7  
YHRQGPYGDQHNHRHLESNFSTSAQCSQY  
>Locus\_10437\_Transcript\_2/2\_Confidence\_0.750\_Length\_2925|. |sp|  
Q26972|SEM1A\_TRICF Semaphorin-1A OS=Tribolium confusum GN=SEMA-1A  
PE=2 SV=1|e=6.1121E-131|from=20|to=2296|frame=2|Fragment\_8  
LLKNVPTCEKQDNLQHELAKHHELKNSTESLDRMGTLQKAKKTYI  
>Locus\_4048\_Transcript\_2/6\_Confidence\_0.625\_Length\_1355|UNIGENE  
REPRESENTATIVE TRANSCRIPT|sp|Q27333|NT56\_DROME Lethal(2)neighbour of  
tid protein OS=Drosophila melanogaster GN=l(2)not PE=1 SV=1|

e=7.05245E-86|from=426|to=1355|frame=-1|Fragment\_1  
NDPIAILFLYLSLNLVYMSKWTLASVALSLAVSIKMN  
>Locus\_4048\_Transcript\_2/6\_Confidence\_0.625\_Length\_1355|UNIGENE  
REPRESENTATIVE TRANSCRIPT|sp|Q27333|NT56\_DROME Lethal(2)neighbour of  
tid protein OS=Drosophila melanogaster GN=l(2)not PE=1 SV=1|  
e=7.05245E-86|from=426|to=1355|frame=-1|Fragment\_2  
IVNLGLVKTIVQLSICGIIQLILGLPFLLVNAVAYIKGSFDFGRVFEHKWTVNYRFLHRD  
IFESGKFHIS  
>Locus\_4048\_Transcript\_2/6\_Confidence\_0.625\_Length\_1355|UNIGENE  
REPRESENTATIVE TRANSCRIPT|sp|Q27333|NT56\_DROME Lethal(2)neighbour of  
tid protein OS=Drosophila melanogaster GN=l(2)not PE=1 SV=1|  
e=7.05245E-86|from=426|to=1355|frame=-1|Fragment\_3  
LAAFFPISFKYMQSYVRLRTVQKQFEPQIN  
>Locus\_4048\_Transcript\_2/6\_Confidence\_0.625\_Length\_1355|UNIGENE  
REPRESENTATIVE TRANSCRIPT|sp|Q27333|NT56\_DROME Lethal(2)neighbour of  
tid protein OS=Drosophila melanogaster GN=l(2)not PE=1 SV=1|  
e=7.05245E-86|from=426|to=1355|frame=-1|Fragment\_4  
A  
>Locus\_4048\_Transcript\_2/6\_Confidence\_0.625\_Length\_1355|UNIGENE  
REPRESENTATIVE TRANSCRIPT|sp|Q27333|NT56\_DROME Lethal(2)neighbour of  
tid protein OS=Drosophila melanogaster GN=l(2)not PE=1 SV=1|  
e=7.05245E-86|from=426|to=1355|frame=-1|Fragment\_5  
EPLTAEQHKFLKDFEKGINKTSTPNRAVTVEPKQDDNVKTFVAVHFDSVTQLALLPIFLC  
NFIGVACSRSLHYQFYVWFHSLPHLLWCTTYSIKVRLILALIEYSWNTYPSTDLSSCV  
LHLCHVAVIWGIYKNI  
>Locus\_4048\_Transcript\_3/6\_Confidence\_0.625\_Length\_1355|. |sp|Q27333|  
NT56\_DROME Lethal(2)neighbour of tid protein OS=Drosophila  
melanogaster GN=l(2)not PE=1 SV=1|e=7.05245E-86|from=426|to=1355|  
frame=-1|Fragment\_1  
NDPIAILFLYLSLNLVYMSKWTLASVALSLAVSIKMN  
>Locus\_4048\_Transcript\_3/6\_Confidence\_0.625\_Length\_1355|. |sp|Q27333|  
NT56\_DROME Lethal(2)neighbour of tid protein OS=Drosophila  
melanogaster GN=l(2)not PE=1 SV=1|e=7.05245E-86|from=426|to=1355|  
frame=-1|Fragment\_2  
IVNLGLVKTIVQLSICGIIQLILGLPFLLVNAVAYIKGSFDFGRVFEHKWTVNYRFLHRD  
IFESGKFHIS  
>Locus\_4048\_Transcript\_3/6\_Confidence\_0.625\_Length\_1355|. |sp|Q27333|  
NT56\_DROME Lethal(2)neighbour of tid protein OS=Drosophila  
melanogaster GN=l(2)not PE=1 SV=1|e=7.05245E-86|from=426|to=1355|  
frame=-1|Fragment\_3  
LAAFFPISFKYMQSYVRLRTVQKQFEPQIN  
>Locus\_4048\_Transcript\_3/6\_Confidence\_0.625\_Length\_1355|. |sp|Q27333|  
NT56\_DROME Lethal(2)neighbour of tid protein OS=Drosophila  
melanogaster GN=l(2)not PE=1 SV=1|e=7.05245E-86|from=426|to=1355|  
frame=-1|Fragment\_4  
A  
>Locus\_4048\_Transcript\_3/6\_Confidence\_0.625\_Length\_1355|. |sp|Q27333|  
NT56\_DROME Lethal(2)neighbour of tid protein OS=Drosophila  
melanogaster GN=l(2)not PE=1 SV=1|e=7.05245E-86|from=426|to=1355|  
frame=-1|Fragment\_5  
EPLTAEQHKFLKDFEKGINKTSTPNRAVTVEPKQDDNVKTFVAVHFDSVTQLALLPIFLC  
NFIGVACSRSLHYQFYVWFHSLPHLLWCTTYSIKVRLILALIEYSWNTYPSTDLSSCV  
LHLCHVAVIWGIYKNI  
>Locus\_4048\_Transcript\_5/6\_Confidence\_0.625\_Length\_1355|. |sp|Q27333|

NT56\_DROME Lethal(2)neighbour of tid protein OS=Drosophila  
melanogaster GN=l(2)not PE=1 SV=1|e=7.05245E-86|from=426|to=1355|  
frame=-1|Fragment\_1  
NDPIAILFLYLSLNLYMDSKWTLASVALSLAVSIKMN  
>Locus\_4048\_Transcript\_5/6\_Confidence\_0.625\_Length\_1355|. |sp|Q27333|  
NT56\_DROME Lethal(2)neighbour of tid protein OS=Drosophila  
melanogaster GN=l(2)not PE=1 SV=1|e=7.05245E-86|from=426|to=1355|  
frame=-1|Fragment\_2  
IVNLGLVKTIVQLSICGIIQLILGLPFLLVNAVAYIKGSFDFGRVFEHKWTVNYRFLHRD  
IFESGKFHIS  
>Locus\_4048\_Transcript\_5/6\_Confidence\_0.625\_Length\_1355|. |sp|Q27333|  
NT56\_DROME Lethal(2)neighbour of tid protein OS=Drosophila  
melanogaster GN=l(2)not PE=1 SV=1|e=7.05245E-86|from=426|to=1355|  
frame=-1|Fragment\_3  
LAAFFPISFKYMQSYVRLRTVQKQFEPQIN  
>Locus\_4048\_Transcript\_5/6\_Confidence\_0.625\_Length\_1355|. |sp|Q27333|  
NT56\_DROME Lethal(2)neighbour of tid protein OS=Drosophila  
melanogaster GN=l(2)not PE=1 SV=1|e=7.05245E-86|from=426|to=1355|  
frame=-1|Fragment\_4  
A  
>Locus\_4048\_Transcript\_5/6\_Confidence\_0.625\_Length\_1355|. |sp|Q27333|  
NT56\_DROME Lethal(2)neighbour of tid protein OS=Drosophila  
melanogaster GN=l(2)not PE=1 SV=1|e=7.05245E-86|from=426|to=1355|  
frame=-1|Fragment\_5  
EPLTAEQHKFLKDFEKGINKTSTPNRAVTVEPKQDDNVKTFVAVHFDSVTQLALLPIFLC  
NFIGVACSRSLHYQFYVWYFHSLPHLLWCTTYSIKVRLILALIEYSWNTYPSTDLSSCV  
LHLCHVAVIWGIYKNI  
>Locus\_4048\_Transcript\_6/6\_Confidence\_0.688\_Length\_1355|. |sp|Q27333|  
NT56\_DROME Lethal(2)neighbour of tid protein OS=Drosophila  
melanogaster GN=l(2)not PE=1 SV=1|e=7.05245E-86|from=426|to=1355|  
frame=-1|Fragment\_1  
NDPIAILFLYLSLNLYMDSKWTLASVALSLAVSIKMN  
>Locus\_4048\_Transcript\_6/6\_Confidence\_0.688\_Length\_1355|. |sp|Q27333|  
NT56\_DROME Lethal(2)neighbour of tid protein OS=Drosophila  
melanogaster GN=l(2)not PE=1 SV=1|e=7.05245E-86|from=426|to=1355|  
frame=-1|Fragment\_2  
IVNLGLVKTIVQLSICGIIQLILGLPFLLVNAVAYIKGSFDFGRVFEHKWTVNYRFLHRD  
IFESGKFHIS  
>Locus\_4048\_Transcript\_6/6\_Confidence\_0.688\_Length\_1355|. |sp|Q27333|  
NT56\_DROME Lethal(2)neighbour of tid protein OS=Drosophila  
melanogaster GN=l(2)not PE=1 SV=1|e=7.05245E-86|from=426|to=1355|  
frame=-1|Fragment\_3  
LAAFFPISFKYMQSYVRLRTVQKQFEPQIN  
>Locus\_4048\_Transcript\_6/6\_Confidence\_0.688\_Length\_1355|. |sp|Q27333|  
NT56\_DROME Lethal(2)neighbour of tid protein OS=Drosophila  
melanogaster GN=l(2)not PE=1 SV=1|e=7.05245E-86|from=426|to=1355|  
frame=-1|Fragment\_4  
A  
>Locus\_4048\_Transcript\_6/6\_Confidence\_0.688\_Length\_1355|. |sp|Q27333|  
NT56\_DROME Lethal(2)neighbour of tid protein OS=Drosophila  
melanogaster GN=l(2)not PE=1 SV=1|e=7.05245E-86|from=426|to=1355|  
frame=-1|Fragment\_5  
EPLTAEQHKFLKDFEKGINKTSTPNRAVTVEPKQDDNVKTFVAVHFDSVTQLALLPIFLC  
NFIGVACSRSLHYQFYVWYFHSLPHLLWCTTYSIKVRLILALIEYSWNTYPSTDLSSCV

LHLCHVAVIWGIYKNI

>Locus\_4048\_Transcript\_1/6\_Confidence\_0.688\_Length\_1355|. |sp|Q27333|  
NT56\_DROME Lethal(2)neighbour of tid protein OS=Drosophila  
melanogaster GN=l(2)not PE=1 SV=1|e=9.21079E-86|from=426|to=1355|  
frame=-1|Fragment\_1

NDPIAILFLYLSLNLYMDSKWTLASVALSLAVSIKMN

>Locus\_4048\_Transcript\_1/6\_Confidence\_0.688\_Length\_1355|. |sp|Q27333|  
NT56\_DROME Lethal(2)neighbour of tid protein OS=Drosophila  
melanogaster GN=l(2)not PE=1 SV=1|e=9.21079E-86|from=426|to=1355|  
frame=-1|Fragment\_2

IVNLGLVKTIVQLSICGIIQLILGLPFLLVNAVAYIKGSFDFGRVFEHKWTVNYRFLHRD  
IFESGKFHIS

>Locus\_4048\_Transcript\_1/6\_Confidence\_0.688\_Length\_1355|. |sp|Q27333|  
NT56\_DROME Lethal(2)neighbour of tid protein OS=Drosophila  
melanogaster GN=l(2)not PE=1 SV=1|e=9.21079E-86|from=426|to=1355|  
frame=-1|Fragment\_3

LAAFFPISFKYMQSYVRLRTVQKQFEPQIN

>Locus\_4048\_Transcript\_1/6\_Confidence\_0.688\_Length\_1355|. |sp|Q27333|  
NT56\_DROME Lethal(2)neighbour of tid protein OS=Drosophila  
melanogaster GN=l(2)not PE=1 SV=1|e=9.21079E-86|from=426|to=1355|  
frame=-1|Fragment\_4

A

>Locus\_4048\_Transcript\_1/6\_Confidence\_0.688\_Length\_1355|. |sp|Q27333|  
NT56\_DROME Lethal(2)neighbour of tid protein OS=Drosophila  
melanogaster GN=l(2)not PE=1 SV=1|e=9.21079E-86|from=426|to=1355|  
frame=-1|Fragment\_5

EPLTAEQHKFLKDFEKGINKTSTPNRAVTVEPKQDDNVKTFVHFDSVTQLALLPIFLC  
NFIGVACSRSLHYQFYVWYFHSLPHLLWCTTYSIKVRLILALIEYSWNTYPSTDLSSCV  
LHLCHVAVIWGIYKNV

>Locus\_4048\_Transcript\_4/6\_Confidence\_0.625\_Length\_1355|. |sp|Q27333|  
NT56\_DROME Lethal(2)neighbour of tid protein OS=Drosophila  
melanogaster GN=l(2)not PE=1 SV=1|e=3.50009E-85|from=426|to=1355|  
frame=-1|Fragment\_1

NDPIAILFLYLSLNLYMDSKWTLASVALSLAVSIKMN

>Locus\_4048\_Transcript\_4/6\_Confidence\_0.625\_Length\_1355|. |sp|Q27333|  
NT56\_DROME Lethal(2)neighbour of tid protein OS=Drosophila  
melanogaster GN=l(2)not PE=1 SV=1|e=3.50009E-85|from=426|to=1355|  
frame=-1|Fragment\_2

IVNLGLVKTIVQLSICGIIQLILGLPFLLVNAVAYIKGSFDFGRVFEHKWTVNYRFLHRD  
IFESGKFHIS

>Locus\_4048\_Transcript\_4/6\_Confidence\_0.625\_Length\_1355|. |sp|Q27333|  
NT56\_DROME Lethal(2)neighbour of tid protein OS=Drosophila  
melanogaster GN=l(2)not PE=1 SV=1|e=3.50009E-85|from=426|to=1355|  
frame=-1|Fragment\_3

LAAFFPISFKYMQSYVRLRTVQKQFEPQIN

>Locus\_4048\_Transcript\_4/6\_Confidence\_0.625\_Length\_1355|. |sp|Q27333|  
NT56\_DROME Lethal(2)neighbour of tid protein OS=Drosophila  
melanogaster GN=l(2)not PE=1 SV=1|e=3.50009E-85|from=426|to=1355|  
frame=-1|Fragment\_4

A

>Locus\_4048\_Transcript\_4/6\_Confidence\_0.625\_Length\_1355|. |sp|Q27333|  
NT56\_DROME Lethal(2)neighbour of tid protein OS=Drosophila  
melanogaster GN=l(2)not PE=1 SV=1|e=3.50009E-85|from=426|to=1355|  
frame=-1|Fragment\_5

EPLTAEQHKFLKDFEKGINKTSTPNRAVTVEPKQDDNVKTFAVHFDSVIQLALLPIFLC  
NFIGVACSRSLHYQFYVWFHSLPHLLWCTTYSIKVRLILALIEYSWNTYPSTDLSSCV  
LHLCHVAVIWGIYKNI  
>Locus\_1899\_Transcript\_2/4\_Confidence\_0.700\_Length\_818|. |sp|Q27333|  
NT56\_DROME Lethal(2)neighbour of tid protein OS=Drosophila  
melanogaster GN=l(2)not PE=1 SV=1|e=1.12118E-68|from=258|to=818|  
frame=3|Fragment\_1  
YLSLQFGKELLTSSEKLPISFLILAVELVFNIFIINTRKYTEIDWIAYMQECEGFLNGT  
LDYSQLRGDTGPLVYPAGFVYIYSILYYITAAGKDIYVGQCIFIGIYLCQMALVLRLYTK  
SRKVPPYVLILCALTSYRIHSIYMLRFLNDPIAILFLYLSLNL YMDSKWTLASVALSLAV  
SIKMNIL  
>Locus\_1899\_Transcript\_1/4\_Confidence\_0.600\_Length\_818|. |sp|Q27333|  
NT56\_DROME Lethal(2)neighbour of tid protein OS=Drosophila  
melanogaster GN=l(2)not PE=1 SV=1|e=1.91244E-68|from=258|to=818|  
frame=3|Fragment\_1  
YLSFQFGKELLTSPEKLTIIISFLILAVELVFNIFIINTRKYTEIDWIAYMQECEGFLNGT  
LDYSQLRGDTGPLVYPAGFVYIYSILYYITAAGKDIYVGQCIFIGIYLCQMALVLRLYTK  
SRKVPPYVLILCALTSYRIHSIYMLRFLNDPIAILFLYLSLNL YMDSKWTLASVALSLAV  
SIKMNIL  
>Locus\_1899\_Transcript\_3/4\_Confidence\_0.600\_Length\_818|. |sp|Q27333|  
NT56\_DROME Lethal(2)neighbour of tid protein OS=Drosophila  
melanogaster GN=l(2)not PE=1 SV=1|e=1.91244E-68|from=258|to=818|  
frame=3|Fragment\_1  
YLSFQFGKELLTSPEKLTIIISFLILAVELVFNIFIINTRKYTEIDWIAYMQECEGFLNGT  
LDYSQLRGDTGPLVYPAGFVYIYSILYYITAAGKDIYVGQCIFIGIYLCQMALVLRLYTK  
SRKVPPYVLILCALTSYRIHSIYMLRFLNDPIAILFLYLSLNL YMDSKWTLASVALSLAV  
SIKMNIL  
>Locus\_1899\_Transcript\_4/4\_Confidence\_0.700\_Length\_818|. |sp|Q27333|  
NT56\_DROME Lethal(2)neighbour of tid protein OS=Drosophila  
melanogaster GN=l(2)not PE=1 SV=1|e=1.91244E-68|from=258|to=818|  
frame=3|Fragment\_1  
YLSFQFGKELLTSPEKLTIIISFLILAVELVFNIFIINTRKYTEIDWIAYMQECEGFLNGT  
LDYSQLRGDTGPLVYPAGFVYIYSILYYITAAGKDIYVGQCIFIGIYLCQMALVLRLYTK  
SRKVPPYVLILCALTSYRIHSIYMLRFLNDPIAILFLYLSLNL YMDSKWTLASVALSLAV  
SIKMNIL  
>Locus\_9676\_Transcript\_1/2\_Confidence\_0.750\_Length\_569|UNIGENE  
REPRESENTATIVE TRANSCRIPT|sp|Q27367|CRQ\_DROME Protein croquemort  
OS=Drosophila melanogaster GN=crq PE=1 SV=2|e=3.82172E-44|from=16|  
to=564|frame=1|Fragment\_1  
CSLRCRRCLLFSCSGIFVILALVCGLLWPMIADPIMRSQLVLPQGSKNFEMWKETPIPIY  
LELYLFNWTNPDDINNHDIKPHFEEMGPYVFHEKHVRVDLNNWNQNSTITFKQKRIWNFMP  
DMSKGLDDMITNLNVIVSTVAYTVRNKHLYIQKAVDLLMREKREKLVITKSVRELLFDG  
YQD  
>Locus\_9676\_Transcript\_2/2\_Confidence\_0.750\_Length\_569|. |sp|Q27367|  
CRQ\_DROME Protein croquemort OS=Drosophila melanogaster GN=crq PE=1  
SV=2|e=3.82172E-44|from=16|to=564|frame=1|Fragment\_1  
CSLRCRRCLLFSCSGIFVILALVCGLLWPMIADPIMRSQLVLPQGSKNFEMWKETPIPIY  
LELYLFNWTNPDDINNHDIKPHFEEMGPYVFHEKHVRVDLNNWNQNSTITFKQKRIWNFMP  
DMSKGLDDMITNLNVIVSTVAYTVRNKHLYIQKAVDLLMREKREKLVITKSVRELLFDG  
YQD  
>Locus\_8114\_Transcript\_1/1\_Confidence\_1.000\_Length\_396|UNIGENE  
REPRESENTATIVE TRANSCRIPT|sp|Q4LBB6|OCTB3\_DROME Octopamine receptor  
beta-3R OS=Drosophila melanogaster GN=Octbeta3R PE=2 SV=4|  
e=5.47743E-21|from=1|to=180|frame=1|Fragment\_1

CPCPDVVATLFWIGYFNSALNPLIYAYFNDRDFREAFKNTLKCVFPCAVRQKDSSHLHYV  
>Locus\_6430\_Transcript\_1/2\_Confidence\_0.667\_Length\_2629|UNIGENE  
REPRESENTATIVE TRANSCRIPT|sp|Q7KRW1|TRC8\_DROME Protein TRC8 homolog  
OS=Drosophila melanogaster GN=Trc8 PE=1 SV=1|e=0|from=600|to=2402|  
frame=-3|Fragment\_1  
MSVRTKILGFVDVILRVPLFLLDEIFKIGLGLPL  
>Locus\_6430\_Transcript\_1/2\_Confidence\_0.667\_Length\_2629|UNIGENE  
REPRESENTATIVE TRANSCRIPT|sp|Q7KRW1|TRC8\_DROME Protein TRC8 homolog  
OS=Drosophila melanogaster GN=Trc8 PE=1 SV=1|e=0|from=600|to=2402|  
frame=-3|Fragment\_2  
ANEOPYLDLNVTKVILTDAEQ  
>Locus\_6430\_Transcript\_1/2\_Confidence\_0.667\_Length\_2629|UNIGENE  
REPRESENTATIVE TRANSCRIPT|sp|Q7KRW1|TRC8\_DROME Protein TRC8 homolog  
OS=Drosophila melanogaster GN=Trc8 PE=1 SV=1|e=0|from=600|to=2402|  
frame=-3|Fragment\_3  
ITYDNDFYRVLLTTACKFIVCCLGCISALCIFTLWTKHLVVVYMYLLSIAIIVLSYLG  
SLIKALVDKPSLVEMVIHSNYSVLLLETEGPVFLCSHLLGQLIMGFSFQYVHMGP  
RYSV  
QKLLPYTFLFPLTIALFPIPRELLKHVAMIATLVPLALVKIALWVSAFDV  
VETLYGGFQH  
ARNYASNYGLSALVESEWQRLNVPCVLRFAWMIRLFE  
>Locus\_6430\_Transcript\_1/2\_Confidence\_0.667\_Length\_2629|UNIGENE  
REPRESENTATIVE TRANSCRIPT|sp|Q7KRW1|TRC8\_DROME Protein TRC8 homolog  
OS=Drosophila melanogaster GN=Trc8 PE=1 SV=1|e=0|from=600|to=2402|  
frame=-3|Fragment\_4  
QLSNIIEENNITFMGAVQTLVCGCETVAVLGMTSVVSLISHYIGKFFQMFL  
LLTDDDED  
KSMATVSAIVFYILALQTGLTSLSPEKRFVRLCRNLCLLV  
TALLHYIHNNVSP  
LLMSLSA  
ARNPSRNRHIR  
>Locus\_6430\_Transcript\_1/2\_Confidence\_0.667\_Length\_2629|UNIGENE  
REPRESENTATIVE TRANSCRIPT|sp|Q7KRW1|TRC8\_DROME Protein TRC8 homolog  
OS=Drosophila melanogaster GN=Trc8 PE=1 SV=1|e=0|from=600|to=2402|  
frame=-3|Fragment\_5  
LWSRHPTSTWLLAVTAFSIELIVKVLVSLATYTLFLLDARRTT  
FWEPLDDYVYYIRGFGN  
GVEFLFGIFLFFNGAWILIFES  
>Locus\_6430\_Transcript\_1/2\_Confidence\_0.667\_Length\_2629|UNIGENE  
REPRESENTATIVE TRANSCRIPT|sp|Q7KRW1|TRC8\_DROME Protein TRC8 homolog  
OS=Drosophila melanogaster GN=Trc8 PE=1 SV=1|e=0|from=600|to=2402|  
frame=-3|Fragment\_6  
GGAIRAVMMCVHAYFNIWCEARAGWGVFMKRRTAVHKIRSLPEATKEDLEQLADVCAICY  
QEMTAAKITRCRHHFFHGVCLRWLYVQDSCPLCHELL  
>Locus\_7677\_Transcript\_2/2\_Confidence\_0.667\_Length\_1080|UNIGENE  
REPRESENTATIVE TRANSCRIPT|sp|Q7KT91|C3390\_DROME Non-lysosomal  
glucosylceramidase OS=Drosophila melanogaster GN=CG33090 PE=1 SV=1|  
e=1.3632E-102|from=5|to=1045|frame=2|Fragment\_1  
ENGKR  
>Locus\_7677\_Transcript\_2/2\_Confidence\_0.667\_Length\_1080|UNIGENE  
REPRESENTATIVE TRANSCRIPT|sp|Q7KT91|C3390\_DROME Non-lysosomal  
glucosylceramidase OS=Drosophila melanogaster GN=CG33090 PE=1 SV=1|  
e=1.3632E-102|from=5|to=1045|frame=2|Fragment\_2  
EFCRFQLRPGKYEYNTVIANQFIINIKDSNKKTI  
FQSVLS  
>Locus\_7677\_Transcript\_2/2\_Confidence\_0.667\_Length\_1080|UNIGENE  
REPRESENTATIVE TRANSCRIPT|sp|Q7KT91|C3390\_DROME Non-lysosomal  
glucosylceramidase OS=Drosophila melanogaster GN=CG33090 PE=1 SV=1|  
e=1.3632E-102|from=5|to=1045|frame=2|Fragment\_3  
TYEKPS  
>Locus\_7677\_Transcript\_2/2\_Confidence\_0.667\_Length\_1080|UNIGENE

REPRESENTATIVE TRANSCRIPT|sp|Q7KT91|C3390\_DROME Non-lysosomal glucosylceramidase OS=Drosophila melanogaster GN=CG33090 PE=1 SV=1|e=1.3632E-102|from=5|to=1045|frame=2|Fragment\_4  
KPLECWQWQLNPDKCSYTGlyPRSWTEYDLSEYGIKLTcrQVSPVIPHEYKDSCLPCAVF  
VWSVDNICSEERTVSITFSFKNGTGTAKQDAEGNASSFKVSNENITSVCISQAIDNMICT  
YNLSTRNNVKNIQVSTCDKFDPCGNGGKFWQELYENGCFTQRIDDGAFKGDVGVAICAQ  
SKIAPNNSCDFEFALSWDMPSIHFMGK

>Locus\_7677\_Transcript\_2/2\_Confidence\_0.667\_Length\_1080|UNIGENE  
REPRESENTATIVE TRANSCRIPT|sp|Q7KT91|C3390\_DROME Non-lysosomal glucosylceramidase OS=Drosophila melanogaster GN=CG33090 PE=1 SV=1|e=1.3632E-102|from=5|to=1045|frame=2|Fragment\_5  
NLYKRYYYTKYFEGK

>Locus\_7677\_Transcript\_2/2\_Confidence\_0.667\_Length\_1080|UNIGENE  
REPRESENTATIVE TRANSCRIPT|sp|Q7KT91|C3390\_DROME Non-lysosomal glucosylceramidase OS=Drosophila melanogaster GN=CG33090 PE=1 SV=1|e=1.3632E-102|from=5|to=1045|frame=2|Fragment\_6  
NAGILIGEHALTNYKMWEEQIYNWQSPILNDELDPDwyKGSLFNELYYVSDGGTV

>Locus\_7677\_Transcript\_1/2\_Confidence\_0.667\_Length\_942|. |sp|Q7KT91|C3390\_DROME Non-lysosomal glucosylceramidase OS=Drosophila melanogaster GN=CG33090 PE=1 SV=1|e=4.27044E-86|from=5|to=934|frame=2|Fragment\_1  
ENGKR

>Locus\_7677\_Transcript\_1/2\_Confidence\_0.667\_Length\_942|. |sp|Q7KT91|C3390\_DROME Non-lysosomal glucosylceramidase OS=Drosophila melanogaster GN=CG33090 PE=1 SV=1|e=4.27044E-86|from=5|to=934|frame=2|Fragment\_2  
EFCRFQLRPGKYEYNTVIANQFIINIKDSNKKTIQSVLS

>Locus\_7677\_Transcript\_1/2\_Confidence\_0.667\_Length\_942|. |sp|Q7KT91|C3390\_DROME Non-lysosomal glucosylceramidase OS=Drosophila melanogaster GN=CG33090 PE=1 SV=1|e=4.27044E-86|from=5|to=934|frame=2|Fragment\_3  
TYEKPS

>Locus\_7677\_Transcript\_1/2\_Confidence\_0.667\_Length\_942|. |sp|Q7KT91|C3390\_DROME Non-lysosomal glucosylceramidase OS=Drosophila melanogaster GN=CG33090 PE=1 SV=1|e=4.27044E-86|from=5|to=934|frame=2|Fragment\_4  
KPLECWQWQLNPDKCSYTGlyPRSWTEYDLSEYGIKLTcrQVSPVIPHEYKDSCLPCAVF  
VWSVDNICSEERTVSITFSFKNGTGTAKQDAEGNASSFKVSNENITSVCISQAIDNMICT  
YNLSTRNNVKNIQVSTCDKFDPCGNGGKFWQELYENGCFTQRIDDGVFKGDVGVAICAQ  
SKIAPNNSCDFEFALSWDMPSIHFMGK

>Locus\_7677\_Transcript\_1/2\_Confidence\_0.667\_Length\_942|. |sp|Q7KT91|C3390\_DROME Non-lysosomal glucosylceramidase OS=Drosophila melanogaster GN=CG33090 PE=1 SV=1|e=4.27044E-86|from=5|to=934|frame=2|Fragment\_5  
NLYKRYYYTKYFEGK

>Locus\_7677\_Transcript\_1/2\_Confidence\_0.667\_Length\_942|. |sp|Q7KT91|C3390\_DROME Non-lysosomal glucosylceramidase OS=Drosophila melanogaster GN=CG33090 PE=1 SV=1|e=4.27044E-86|from=5|to=934|frame=2|Fragment\_6  
NAGILIGEHALTNYKMWE

>Locus\_4025\_Transcript\_2/7\_Confidence\_0.312\_Length\_368|UNIGENE  
REPRESENTATIVE TRANSCRIPT|sp|Q7KVA1|XYLT\_DROME Xylosyltransferase oxt OS=Drosophila melanogaster GN=oxt PE=2 SV=1|e=8.38441E-43|from=1|to=363|frame=1|Fragment\_1

NMKCPGDPKEICGGFFKMNIYETGISKFSPQTAVTLTTNDTEPKVRIVYLLTLNGRAVRQ  
VYRLIKALFHVDHYFYIHVDSRQDYMFRQLLQLENNFPNIRLSRNRFSSTIWGGASLLQML  
L

>Locus\_167\_Transcript\_1/1\_Confidence\_1.000\_Length\_302|. |sp|Q7KVA1|  
XYLT\_DROME Xylosyltransferase oxt OS=Drosophila melanogaster GN=oxt  
PE=2 SV=1|e=1.47479E-39|from=3|to=302|frame=-1|Fragment\_1  
LTANKNKNFVKSHGREVQRFIQKQGLDKTFIECDTHMWRTGDRTLPGWGIQIDGGSDWITL  
TREFVKYIT

>Locus\_167\_Transcript\_1/1\_Confidence\_1.000\_Length\_302|. |sp|Q7KVA1|  
XYLT\_DROME Xylosyltransferase oxt OS=Drosophila melanogaster GN=oxt  
PE=2 SV=1|e=1.47479E-39|from=3|to=302|frame=-1|Fragment\_2  
QEQDALVKGLMTVFRHTLLPAESFFHTVLRN

>Locus\_26648\_Transcript\_1/1\_Confidence\_1.000\_Length\_302|. |sp|Q7KVA1|  
XYLT\_DROME Xylosyltransferase oxt OS=Drosophila melanogaster GN=oxt  
PE=2 SV=1|e=1.47479E-39|from=1|to=300|frame=1|Fragment\_1  
LTANKNKNFVKSHGREVQRFIQKQGLDKTFIECDTHMWRTGDRTLPGWGIQIDGGSDWITL  
TRDFVKYIT

>Locus\_26648\_Transcript\_1/1\_Confidence\_1.000\_Length\_302|. |sp|Q7KVA1|  
XYLT\_DROME Xylosyltransferase oxt OS=Drosophila melanogaster GN=oxt  
PE=2 SV=1|e=1.47479E-39|from=1|to=300|frame=1|Fragment\_2  
QEQDALVKGLMTVFRHTLLPAESFFHTVLRN

>Locus\_8527\_Transcript\_1/1\_Confidence\_1.000\_Length\_299|. |sp|Q7KVA1|  
XYLT\_DROME Xylosyltransferase oxt OS=Drosophila melanogaster GN=oxt  
PE=2 SV=1|e=1.58034E-41|from=1|to=297|frame=1|Fragment\_1  
FPNIRLSRNRFSSTIWGGASLLQMLLASMNELLKSDWKWDFIINLSESDFPKSNRNLVQF  
LTANKNKNFVKSHGREVQRFIQKQGLDKTFIECDTHMWR

>Locus\_18073\_Transcript\_1/1\_Confidence\_1.000\_Length\_299|. |sp|Q7KVA1|  
XYLT\_DROME Xylosyltransferase oxt OS=Drosophila melanogaster GN=oxt  
PE=2 SV=1|e=1.58034E-41|from=3|to=299|frame=-1|Fragment\_1  
FPNIRLSRNRFSSTIWGGASLLQMLLASMNELLKSDWKWDFIINLSESDFPKSNRNLVQF  
LTANKNKNFVKSHGREVQRFIQKQGLDKTFIECDTHMWR

>Locus\_4025\_Transcript\_1/7\_Confidence\_0.188\_Length\_245|. |sp|Q7KVA1|  
XYLT\_DROME Xylosyltransferase oxt OS=Drosophila melanogaster GN=oxt  
PE=2 SV=1|e=4.53162E-28|from=7|to=240|frame=1|Fragment\_1  
KVRIVYLLTLNGRAVRQVYRLIKALFHVDHYFYIHVDSRQDYMFRQLLQLENNFPNIRLS  
RNRFSSTIWGGASLLQMLL

>Locus\_23234\_Transcript\_1/1\_Confidence\_1.000\_Length\_527|UNIGENE  
REPRESENTATIVE TRANSCRIPT|sp|Q7KVV5|KCNN\_DROME Small conductance  
calcium-activated potassium channel protein OS=Drosophila  
melanogaster GN=SK PE=2 SV=2|e=2.26533E-13|from=4|to=471|frame=1|  
Fragment\_1  
PPVLLTAA

>Locus\_23234\_Transcript\_1/1\_Confidence\_1.000\_Length\_527|UNIGENE  
REPRESENTATIVE TRANSCRIPT|sp|Q7KVV5|KCNN\_DROME Small conductance  
calcium-activated potassium channel protein OS=Drosophila  
melanogaster GN=SK PE=2 SV=2|e=2.26533E-13|from=4|to=471|frame=1|  
Fragment\_2  
GGRIVRQSSQPE

>Locus\_23234\_Transcript\_1/1\_Confidence\_1.000\_Length\_527|UNIGENE  
REPRESENTATIVE TRANSCRIPT|sp|Q7KVV5|KCNN\_DROME Small conductance  
calcium-activated potassium channel protein OS=Drosophila  
melanogaster GN=SK PE=2 SV=2|e=2.26533E-13|from=4|to=471|frame=1|  
Fragment\_3  
PSVSLRQLRDP

>Locus\_23234\_Transcript\_1/1\_Confidence\_1.000\_Length\_527|UNIGENE REPRESENTATIVE TRANSCRIPT|sp|Q7KVV5|KCNN\_DROME Small conductance calcium-activated potassium channel protein OS=Drosophila melanogaster GN=SK PE=2 SV=2|e=2.26533E-13|from=4|to=471|frame=1|Fragment\_4

SLRINGAMRQFKQLRKPVSTLSIPGAMRASGCLRDSGQ

>Locus\_23234\_Transcript\_1/1\_Confidence\_1.000\_Length\_527|UNIGENE REPRESENTATIVE TRANSCRIPT|sp|Q7KVV5|KCNN\_DROME Small conductance calcium-activated potassium channel protein OS=Drosophila melanogaster GN=SK PE=2 SV=2|e=2.26533E-13|from=4|to=471|frame=1|Fragment\_5

DEAGVALVGVHSEYPR

>Locus\_23234\_Transcript\_1/1\_Confidence\_1.000\_Length\_527|UNIGENE REPRESENTATIVE TRANSCRIPT|sp|Q7KVV5|KCNN\_DROME Small conductance calcium-activated potassium channel protein OS=Drosophila melanogaster GN=SK PE=2 SV=2|e=2.26533E-13|from=4|to=471|frame=1|Fragment\_6

FMEER

>Locus\_4771\_Transcript\_2/3\_Confidence\_0.667\_Length\_952|UNIGENE REPRESENTATIVE TRANSCRIPT|sp|Q8IQC1|TVP23\_DROME Uncharacterized Golgi apparatus membrane protein-like protein CG5021 OS=Drosophila melanogaster GN=CG5021 PE=2 SV=2|e=1.40421E-76|from=115|to=765|frame=-2|Fragment\_1

IGSTMQKEVPLDDDTIPFGEDEVN

>Locus\_4771\_Transcript\_2/3\_Confidence\_0.667\_Length\_952|UNIGENE REPRESENTATIVE TRANSCRIPT|sp|Q8IQC1|TVP23\_DROME Uncharacterized Golgi apparatus membrane protein-like protein CG5021 OS=Drosophila melanogaster GN=CG5021 PE=2 SV=2|e=1.40421E-76|from=115|to=765|frame=-2|Fragment\_2

ARNSGKLTHPYVTFHLLFFRCSSIVVYMLCGWFSDSFITSFVCVLLLSADFVTKNITG  
RLLVGLRWVNYVDDEGVSHWVYEARKG

>Locus\_4771\_Transcript\_2/3\_Confidence\_0.667\_Length\_952|UNIGENE REPRESENTATIVE TRANSCRIPT|sp|Q8IQC1|TVP23\_DROME Uncharacterized Golgi apparatus membrane protein-like protein CG5021 OS=Drosophila melanogaster GN=CG5021 PE=2 SV=2|e=1.40421E-76|from=115|to=765|frame=-2|Fragment\_3

MIQGRVNQRESKIFWLALVLCVWVAVFFIIALFGFKFKW

>Locus\_4771\_Transcript\_2/3\_Confidence\_0.667\_Length\_952|UNIGENE REPRESENTATIVE TRANSCRIPT|sp|Q8IQC1|TVP23\_DROME Uncharacterized Golgi apparatus membrane protein-like protein CG5021 OS=Drosophila melanogaster GN=CG5021 PE=2 SV=2|e=1.40421E-76|from=115|to=765|frame=-2|Fragment\_4

LHGYIKCNFGASKDLGSVTTEFFKAKLLQNAVSMNKPA

>Locus\_4771\_Transcript\_2/3\_Confidence\_0.667\_Length\_952|UNIGENE REPRESENTATIVE TRANSCRIPT|sp|Q8IQC1|TVP23\_DROME Uncharacterized Golgi apparatus membrane protein-like protein CG5021 OS=Drosophila melanogaster GN=CG5021 PE=2 SV=2|e=1.40421E-76|from=115|to=765|frame=-2|Fragment\_5

QPSTAQPTGIV

>Locus\_4771\_Transcript\_1/3\_Confidence\_0.500\_Length\_940|. |sp|Q8IQC1|TVP23\_DROME Uncharacterized Golgi apparatus membrane protein-like protein CG5021 OS=Drosophila melanogaster GN=CG5021 PE=2 SV=2|e=6.8337E-76|from=115|to=753|frame=-2|Fragment\_1

IGSTMQKEVPLDDDTIPFGEDEVN

>Locus\_4771\_Transcript\_1/3\_Confidence\_0.500\_Length\_940|. |sp|Q8IQC1|  
TVP23\_DROME Uncharacterized Golgi apparatus membrane protein-like  
protein CG5021 OS=Drosophila melanogaster GN=CG5021 PE=2 SV=2|  
e=6.8337E-76|from=115|to=753|frame=-2|Fragment\_2  
ARNSGKLTHPYVTFHLLFFRCSSIVVYMLCGWFSDSFITSFVVCVLLLSADFWTVKNITG  
RLLVGLRWNNYVDDEGVSHWVYEAR

>Locus\_4771\_Transcript\_1/3\_Confidence\_0.500\_Length\_940|. |sp|Q8IQC1|  
TVP23\_DROME Uncharacterized Golgi apparatus membrane protein-like  
protein CG5021 OS=Drosophila melanogaster GN=CG5021 PE=2 SV=2|  
e=6.8337E-76|from=115|to=753|frame=-2|Fragment\_3  
KGRVNQRESKIFWLALVLCVWVAVFFIIFGFKFKW

>Locus\_4771\_Transcript\_1/3\_Confidence\_0.500\_Length\_940|. |sp|Q8IQC1|  
TVP23\_DROME Uncharacterized Golgi apparatus membrane protein-like  
protein CG5021 OS=Drosophila melanogaster GN=CG5021 PE=2 SV=2|  
e=6.8337E-76|from=115|to=753|frame=-2|Fragment\_4  
LHGYIKCNFGASKDLGCVTTEFFKAKLLQNAVSMFNKPA

>Locus\_4771\_Transcript\_1/3\_Confidence\_0.500\_Length\_940|. |sp|Q8IQC1|  
TVP23\_DROME Uncharacterized Golgi apparatus membrane protein-like  
protein CG5021 OS=Drosophila melanogaster GN=CG5021 PE=2 SV=2|  
e=6.8337E-76|from=115|to=753|frame=-2|Fragment\_5  
QPSTAQPTGIV

>Locus\_4771\_Transcript\_3/3\_Confidence\_0.667\_Length\_940|. |sp|Q8IQC1|  
TVP23\_DROME Uncharacterized Golgi apparatus membrane protein-like  
protein CG5021 OS=Drosophila melanogaster GN=CG5021 PE=2 SV=2|  
e=6.8337E-76|from=115|to=753|frame=-2|Fragment\_1  
IGSTMQKEVPLLDLDDTIPFGEDEVN

>Locus\_4771\_Transcript\_3/3\_Confidence\_0.667\_Length\_940|. |sp|Q8IQC1|  
TVP23\_DROME Uncharacterized Golgi apparatus membrane protein-like  
protein CG5021 OS=Drosophila melanogaster GN=CG5021 PE=2 SV=2|  
e=6.8337E-76|from=115|to=753|frame=-2|Fragment\_2  
ARNSGKLTHPYVTFHLLFFRCSSIVVYMLCGWFSDSFITSFVVCVLLLSADFWTVKNITG  
RLLVGLRWNNYVDDEGVSHWVYEAR

>Locus\_4771\_Transcript\_3/3\_Confidence\_0.667\_Length\_940|. |sp|Q8IQC1|  
TVP23\_DROME Uncharacterized Golgi apparatus membrane protein-like  
protein CG5021 OS=Drosophila melanogaster GN=CG5021 PE=2 SV=2|  
e=6.8337E-76|from=115|to=753|frame=-2|Fragment\_3  
KGRVNQRESKIFWLALVLCVWVAVFFIIFGFKFKW

>Locus\_4771\_Transcript\_3/3\_Confidence\_0.667\_Length\_940|. |sp|Q8IQC1|  
TVP23\_DROME Uncharacterized Golgi apparatus membrane protein-like  
protein CG5021 OS=Drosophila melanogaster GN=CG5021 PE=2 SV=2|  
e=6.8337E-76|from=115|to=753|frame=-2|Fragment\_4  
LHGYIKCNFGASKDLGCVTTEFFKAKLLQNAVSMFNKPA

>Locus\_4771\_Transcript\_3/3\_Confidence\_0.667\_Length\_940|. |sp|Q8IQC1|  
TVP23\_DROME Uncharacterized Golgi apparatus membrane protein-like  
protein CG5021 OS=Drosophila melanogaster GN=CG5021 PE=2 SV=2|  
e=6.8337E-76|from=115|to=753|frame=-2|Fragment\_5  
QPSTAQPTGIV

>Locus\_30807\_Transcript\_1/1\_Confidence\_1.000\_Length\_246|UNIGENE  
REPRESENTATIVE TRANSCRIPT|sp|Q8IS44|DRD2L\_DROME Dopamine D2-like  
receptor OS=Drosophila melanogaster GN=D2R PE=2 SV=1|e=7.00752E-21|  
from=3|to=245|frame=-2|Fragment\_1  
YNYWALILMVFPFLTLFGNVLVIMAVARERTLQTVTNYFIVS

>Locus\_30807\_Transcript\_1/1\_Confidence\_1.000\_Length\_246|UNIGENE  
REPRESENTATIVE TRANSCRIPT|sp|Q8IS44|DRD2L\_DROME Dopamine D2-like

receptor OS=Drosophila melanogaster GN=D2R PE=2 SV=1|e=7.00752E-21|  
from=3|to=245|frame=-2|Fragment\_2  
FNGTWGLPPFVCFYIAMD  
>Locus\_7398\_Transcript\_1/10\_Confidence\_0.097\_Length\_1265|UNIGENE  
REPRESENTATIVE TRANSCRIPT|sp|Q8MRC9|GALT9\_DROME Putative polypeptide  
N-acetylgalactosaminyltransferase 9 OS=Drosophila melanogaster  
GN=pgant9 PE=2 SV=2|e=2.80626E-65|from=816|to=1265|frame=-1|  
Fragment\_1  
CKPFWYLDTVFPEMFIPGEAIANGEIRNLGYGGKTCLDSPARRVDMHKAVGLYPCHRQG  
GNQYWMLSKSGEIRRDDACL DYAGQDVILYQCHGSKGNQMWTYNDET NQIKHGSSEKCLA  
ISETKQKLLMEDCDNAAARQKWTLENYDPS  
>Locus\_13990\_Transcript\_1/1\_Confidence\_1.000\_Length\_414|UNIGENE  
REPRESENTATIVE TRANSCRIPT|sp|Q8MSU3|FRRS1\_DROME Putative ferric-  
chelate reductase 1 homolog OS=Drosophila melanogaster GN=CG8399  
PE=2 SV=1|e=2.24073E-23|from=2|to=412|frame=2|Fragment\_1  
DDTYKLIDCATP  
>Locus\_13990\_Transcript\_1/1\_Confidence\_1.000\_Length\_414|UNIGENE  
REPRESENTATIVE TRANSCRIPT|sp|Q8MSU3|FRRS1\_DROME Putative ferric-  
chelate reductase 1 homolog OS=Drosophila melanogaster GN=CG8399  
PE=2 SV=1|e=2.24073E-23|from=2|to=412|frame=2|Fragment\_2  
GSTATHSTVKKQDLQLEWTAPDNFLGRVIFRATVAQEYAFWVGLESEVVDVPRGQGG  
>Locus\_13990\_Transcript\_1/1\_Confidence\_1.000\_Length\_414|UNIGENE  
REPRESENTATIVE TRANSCRIPT|sp|Q8MSU3|FRRS1\_DROME Putative ferric-  
chelate reductase 1 homolog OS=Drosophila melanogaster GN=CG8399  
PE=2 SV=1|e=2.24073E-23|from=2|to=412|frame=2|Fragment\_3  
QHGGI  
>Locus\_13990\_Transcript\_1/1\_Confidence\_1.000\_Length\_414|UNIGENE  
REPRESENTATIVE TRANSCRIPT|sp|Q8MSU3|FRRS1\_DROME Putative ferric-  
chelate reductase 1 homolog OS=Drosophila melanogaster GN=CG8399  
PE=2 SV=1|e=2.24073E-23|from=2|to=412|frame=2|Fragment\_4  
ESSSALKNDPFYNGCGSQKTCFGQPEGCVTTKDKLVMACTVR  
>Locus\_25853\_Transcript\_1/1\_Confidence\_1.000\_Length\_318|. |sp|Q8MSU3|  
FRRS1\_DROME Putative ferric-chelate reductase 1 homolog  
OS=Drosophila melanogaster GN=CG8399 PE=2 SV=1|e=9.16432E-18|  
from=56|to=316|frame=2|Fragment\_1  
LPQGAPESVCD SMMPFH  
>Locus\_25853\_Transcript\_1/1\_Confidence\_1.000\_Length\_318|. |sp|Q8MSU3|  
FRRS1\_DROME Putative ferric-chelate reductase 1 homolog  
OS=Drosophila melanogaster GN=CG8399 PE=2 SV=1|e=9.16432E-18|  
from=56|to=316|frame=2|Fragment\_2  
GGGISAQNSQAPFQIFLDSTR TENGQPLRLVL  
>Locus\_25853\_Transcript\_1/1\_Confidence\_1.000\_Length\_318|. |sp|Q8MSU3|  
FRRS1\_DROME Putative ferric-chelate reductase 1 homolog  
OS=Drosophila melanogaster GN=CG8399 PE=2 SV=1|e=9.16432E-18|  
from=56|to=316|frame=2|Fragment\_3  
GSSQGVPFKGFMIHARRVMPPYDVVGTFTPAGDDTYKL  
>Locus\_24214\_Transcript\_1/1\_Confidence\_1.000\_Length\_267|. |sp|Q8MSU3|  
FRRS1\_DROME Putative ferric-chelate reductase 1 homolog  
OS=Drosophila melanogaster GN=CG8399 PE=2 SV=1|e=1.53396E-12|  
from=57|to=266|frame=-2|Fragment\_1  
AGDDTYKLIDCATP  
>Locus\_24214\_Transcript\_1/1\_Confidence\_1.000\_Length\_267|. |sp|Q8MSU3|  
FRRS1\_DROME Putative ferric-chelate reductase 1 homolog  
OS=Drosophila melanogaster GN=CG8399 PE=2 SV=1|e=1.53396E-12|

from=57|to=266|frame=-2|Fragment\_2  
GSTATHTSTVKKQDLQLEWTAPDNFLGRVIFRATVAQEYAQFWVGLESEVVDVPR  
>Locus\_5466\_Transcript\_1/2\_Confidence\_0.750\_Length\_1600|UNIGENE  
REPRESENTATIVE TRANSCRIPT|sp|Q8MZR5|HYEP2\_CTEFE Juvenile hormone  
epoxide hydrolase 2 OS=Ctenocephalides felis GN=EH2 PE=2 SV=1|e=0|  
from=107|to=1501|frame=2|Fragment\_1

MSNCCRILWIAIVIGLVLYEITKEFPKPNIPLDTWGTGKSQKIDTSMRPFKIAINDE  
VLNLTCLKVLSVDFTPPLEGIDFQYGFNTNTLKKLVDFWRTQYNWREREALLNKYPHFKT  
NIQGLDIHYVHIKPQVSKNIHVLPMIMVHGWPGSFVEFYKIIPMLTTPRTDYNFVFEIL  
PSIPGYGFSQAAAKPGLGATQIAVIMHNLMDRIGFKKYYVQGGDWGSRIVSAMSTLFPEN  
VLGHSNLCFLNTLSSNIKSFVGSFLPEWFAGKQNVHKIYPLSEHFFTLLEESGYFHIQA  
TKPDTVGVALRDSAPAGLAAYILEKFSTGTNKAWRSKADGNLQSKFTFTELLDNVMIYYVT  
GSITTSMRIYAESYSWDHLSLNMDRVPTIVPTACAKFPHEIAYKTDQLAEKYKTLLQST  
IMPRGGHF

>Locus\_5466\_Transcript\_1/2\_Confidence\_0.750\_Length\_1600|UNIGENE  
REPRESENTATIVE TRANSCRIPT|sp|Q8MZR5|HYEP2\_CTEFE Juvenile hormone  
epoxide hydrolase 2 OS=Ctenocephalides felis GN=EH2 PE=2 SV=1|e=0|  
from=107|to=1501|frame=2|Fragment\_2

DIFSAVKKFIDHHSKKDSKNQENRDL

>Locus\_5466\_Transcript\_2/2\_Confidence\_0.750\_Length\_1600|. |sp|Q8MZR5|  
HYEP2\_CTEFE Juvenile hormone epoxide hydrolase 2 OS=Ctenocephalides  
felis GN=EH2 PE=2 SV=1|e=0|from=107|to=1501|frame=2|Fragment\_1

MSNCCRILWIAIVIGLVLYEITKEFPKPNIPLDTWGTGKSQKIDTSMRPFKIAINDE  
VLNLTCLKVLSVDFTPPLEGIDFQYGFNTNTLKKLIDFWRTQYNWREREALLNKYPHFKT  
NIQGLDIHYVHIKPQVSKNIHVLPMIMVHGWPGSFVEFYKIIPMLTTPRTDYNFVFEIL  
PSIPGYGFSQAAAKPGLGATQIAVIMHNLMDRIGFKKYYVQGGDWGSRIVSAMSTLFPEN  
VLGHSNLCFLNTLSSNIKSFVGSFLPEWFAGKQNVHKIYPLSEHFFTLLEESGYFHIQA  
TKPDTVGVALRDSAPAGLAAYILEKFSTGTNKAWRSKADGNLQSKFTFTELLDNVMIYYVT  
GSITTSMRIYAESYSWDHLSLNMDRVPTIVPTACAKFPHEIAYKTDQLAEKYKTLLQST  
IMPRGGHF

>Locus\_5466\_Transcript\_2/2\_Confidence\_0.750\_Length\_1600|. |sp|Q8MZR5|  
HYEP2\_CTEFE Juvenile hormone epoxide hydrolase 2 OS=Ctenocephalides  
felis GN=EH2 PE=2 SV=1|e=0|from=107|to=1501|frame=2|Fragment\_2

DIFSAVKKFIDHHSKKDSKNQENRDL

>Locus\_8898\_Transcript\_1/1\_Confidence\_1.000\_Length\_1648|UNIGENE  
REPRESENTATIVE TRANSCRIPT|sp|Q8MZR6|HYEP1\_CTEFE Juvenile hormone  
epoxide hydrolase 1 OS=Ctenocephalides felis GN=EH1 PE=1 SV=3|e=0|  
from=112|to=1506|frame=-2|Fragment\_1

MGKCCRMILFAAIAGI AVLYYQITKELPKPNIPLDTWGPGKPNVDISIRPFKININNK  
VIENLKLKLNVDVQYTLPLEGINFEYGFNTDSLKKIVDFWRTQYNWREREALLNKYPHFKT  
NIQGLDIHYVHIKPQVSKNIEVLPLVMIHGWPGSFVEFYKIIPMLTTPRAGYNFVFEIL  
PSIPGYGFSQAAAKPGLGSTQVAVIMRNLMERIGFKKYYVQGGDWGSMIISAMSTLFPEN  
VLGQHSNLCFVNTSSNIKAIIGSFPEFAGTGNHAKMYPMSEHFFTLLEEMGYLHLQA  
TKPDTVGVALRDSAPAGLAAYILEKFSTWNTNRSWRSVKDGNLLKYNIPPELLDNVMIYYVT  
DSITTSMRLYAESFTKAHLALNLDVRNHPAACAKFPNELAYVTDCQLAEKYKTLLQSN  
DMPSGGHFAAFEEPGLLAEDIFTAVKKFKEFYSKKAEESQKKADL

>Locus\_2081\_Transcript\_1/1\_Confidence\_1.000\_Length\_709|UNIGENE  
REPRESENTATIVE TRANSCRIPT|sp|Q8SWV6|FICD\_DROME Adenosine  
monophosphate-protein transferase FICD homolog OS=Drosophila  
melanogaster GN=CG9523 PE=1 SV=1|e=1.23443E-38|from=315|to=707|  
frame=3|Fragment\_1

EANKVSEIEALSSLKAAMD LKVQGR LDRALKLFEHAAALAPKHPDVLTKYGEFLEETKKD  
IVKADQLYFQALTYCPTHDAVSNRQRTSTIVANIDNTRLESIDRKRDALAAIPESNGSL  
RRAKKEAYFSY

>Locus\_28693\_Transcript\_1/1\_Confidence\_1.000\_Length\_379|UNIGENE  
REPRESENTATIVE TRANSCRIPT|sp|Q94887|NRX4\_DROME Neurexin-4  
OS=Drosophila melanogaster GN=Nrx-IV PE=1 SV=2|e=2.48117E-55|from=2|  
to=379|frame=-1|Fragment\_1  
GRYTLGPLLCEGDDL FNNVVTIRIKDAALNIPTFDMGHSGDIYFEFKTTIENAVLLHSTG  
PTDNIKLSIIGGTKLQFQYQAGSGPLGVS VETAYHLNDDNWH SVSVERNRKEARIVVDGA  
QKAEVR

>Locus\_28338\_Transcript\_1/1\_Confidence\_1.000\_Length\_245|. |sp|Q94887|  
NRX4\_DROME Neurexin-4 OS=Drosophila melanogaster GN=Nrx-IV PE=1  
SV=2|e=8.52647E-35|from=1|to=243|frame=1|Fragment\_1  
AYHLNDDNWH SVSVERNRKEARIVVDGAQKAEVREPPGPV RALHLTSDLTIGASVDYRDG  
FVGCIRALLNGELVDLKGYA

>Locus\_8009\_Transcript\_1/1\_Confidence\_1.000\_Length\_1781|UNIGENE  
REPRESENTATIVE TRANSCRIPT|sp|Q95T64|PGPLA\_DROME Peptidoglycan-  
recognition protein LA OS=Drosophila melanogaster GN=PGRP-LA PE=1  
SV=2|e=3.93151E-34|from=1128|to=1778|frame=-1|Fragment\_1  
LLVCALLAFGLYFIVDVKKREVPYYDDIISDGRGSNAT

>Locus\_8009\_Transcript\_1/1\_Confidence\_1.000\_Length\_1781|UNIGENE  
REPRESENTATIVE TRANSCRIPT|sp|Q95T64|PGPLA\_DROME Peptidoglycan-  
recognition protein LA OS=Drosophila melanogaster GN=PGRP-LA PE=1  
SV=2|e=3.93151E-34|from=1128|to=1778|frame=-1|Fragment\_2  
LGGGHQLIYRDTWGGVEPR

>Locus\_8009\_Transcript\_1/1\_Confidence\_1.000\_Length\_1781|UNIGENE  
REPRESENTATIVE TRANSCRIPT|sp|Q95T64|PGPLA\_DROME Peptidoglycan-  
recognition protein LA OS=Drosophila melanogaster GN=PGRP-LA PE=1  
SV=2|e=3.93151E-34|from=1128|to=1778|frame=-1|Fragment\_3  
ATRRLYHPTPYVVLTHVGGLSRRCEDLSTCSLEMRNQADHYIRFGSPDIGQNFVGGDG  
NVYVGRGWD

>Locus\_8009\_Transcript\_1/1\_Confidence\_1.000\_Length\_1781|UNIGENE  
REPRESENTATIVE TRANSCRIPT|sp|Q95T64|PGPLA\_DROME Peptidoglycan-  
recognition protein LA OS=Drosophila melanogaster GN=PGRP-LA PE=1  
SV=2|e=3.93151E-34|from=1128|to=1778|frame=-1|Fragment\_4  
SGDYSKI HATPRQLDATQRLLALGVSMGKLS EDYKLIGHNQSTFTLSPGNL FSEISKWP  
HWYNCSYKMETTCGAEI

>Locus\_13006\_Transcript\_1/1\_Confidence\_1.000\_Length\_349|UNIGENE  
REPRESENTATIVE TRANSCRIPT|sp|Q95TU8|UNC5\_DROME Netrin receptor unc-5  
OS=Drosophila melanogaster GN=unc-5 PE=2 SV=1|e=7.79991E-17|from=48|  
to=347|frame=-3|Fragment\_1  
GRRISSQVMLTVYVDGGWSAWSAWTPCDCPL

>Locus\_13006\_Transcript\_1/1\_Confidence\_1.000\_Length\_349|UNIGENE  
REPRESENTATIVE TRANSCRIPT|sp|Q95TU8|UNC5\_DROME Netrin receptor unc-5  
OS=Drosophila melanogaster GN=unc-5 PE=2 SV=1|e=7.79991E-17|from=48|  
to=347|frame=-3|Fragment\_2  
GHERITSSARSSSQGRKRIRYCNNPTPVNDGRKCPGKNVQRTSDCAQCP

>Locus\_27691\_Transcript\_1/1\_Confidence\_1.000\_Length\_284|UNIGENE  
REPRESENTATIVE TRANSCRIPT|sp|Q967D7|TUTL\_DROME Protein turtle  
OS=Drosophila melanogaster GN=tutl PE=2 SV=2|e=1.36073E-32|from=2|  
to=265|frame=-2|Fragment\_1  
PNEKIFQL

>Locus\_27691\_Transcript\_1/1\_Confidence\_1.000\_Length\_284|UNIGENE  
REPRESENTATIVE TRANSCRIPT|sp|Q967D7|TUTL\_DROME Protein turtle  
OS=Drosophila melanogaster GN=tutl PE=2 SV=2|e=1.36073E-32|from=2|  
to=265|frame=-2|Fragment\_2  
PRNLTVTEISNGFLITWQVPLERAHLIQFYTIKYRTDAQWKT LNKQIRPEETS YLVKNL

VGGRTYYFR

>Locus\_8363\_Transcript\_4/5\_Confidence\_0.667\_Length\_1008|UNIGENE REPRESENTATIVE TRANSCRIPT|sp|Q9GQQ0|SPIN\_DROME Protein spinster OS=Drosophila melanogaster GN=spin PE=1 SV=1|e=7.06886E-74|from=1|to=627|frame=1|Fragment\_1

LFYFAIPVGSGLGYIAGSAMAHIGGSWHWALRVTPALGLVAVILIKFIQDPVRGHSEQSM  
DLEPTSYTDDLKSLKNSFMLSTAGFTCVAFVTGALAWWGPKFIHSGMILQPGNRDVTI  
NDVSFKFGIVAMLAGVTGVPLGSLIASRLRPLYPSCDPLICATGMLVAAPLLYFAAITPG  
YNTNLCFALMFFGQVSMNMNWPLVADMLL

>Locus\_8363\_Transcript\_4/5\_Confidence\_0.667\_Length\_1008|. |sp|Q9GQQ0| SPIN\_DROME Protein spinster OS=Drosophila melanogaster GN=spin PE=1 SV=1|e=1.05893E-45|from=629|to=1003|frame=2|Fragment\_1

VAVFVGLLTMISGLVGVPLGSYLSQSLKTYPRADPLLCAAGLLISTPLLAAGMLVVQLN  
STVAFILMFFGELALNLNWAIVADILLYVVIPTRRSTAEAFQILISHTFGDAGSPYLIGV  
ISEAL

>Locus\_8363\_Transcript\_1/5\_Confidence\_0.500\_Length\_800|. |sp|Q9GQQ0| SPIN\_DROME Protein spinster OS=Drosophila melanogaster GN=spin PE=1 SV=1|e=6.10372E-80|from=1|to=666|frame=1|Fragment\_1

LFYFAIPVGSGLGYIAGSAMAHIGGSWHWALRVTPALGLVAVILIKFIQDPVRGHSEQSM  
DLEPTSYTDDLKSLKNSFMLSTAGFTCVAFVTGALAWWGPKFIHSGMILQPGNRDVTI  
NEVAFVGLLTMISGLVGVPLGSYLSQSLKTYPRADPLLCAAGLLISTPLLAAGMLVVQ  
LNSTVAFILMFFGELALNLNWAIVADILL

>Locus\_8363\_Transcript\_1/5\_Confidence\_0.500\_Length\_800|. |sp|Q9GQQ0| SPIN\_DROME Protein spinster OS=Drosophila melanogaster GN=spin PE=1 SV=1|e=6.10372E-80|from=1|to=666|frame=1|Fragment\_2

VRMPFMNNMANDF

>Locus\_8363\_Transcript\_5/5\_Confidence\_0.583\_Length\_746|. |sp|Q9GQQ0| SPIN\_DROME Protein spinster OS=Drosophila melanogaster GN=spin PE=1 SV=1|e=2.3579E-99|from=1|to=741|frame=1|Fragment\_1

LFYFAIPVGSGLGYIAGSAMAHIGGSWHWALRVTPALGLVAVILIKFIQDPVRGHSEQSM  
DLEPTSYTDDLKSLKNSFMLSTAGFTCVAFVTGALAWWGPKFIHSGMILQPGNRDVTI  
NEVAFVGLLTMISGLVGVPLGSYLSQSLKTYPRADPLLCAAGLLISTPLLAAGMLVVQ  
LNSTVAFILMFFGELALNLNWAIVADILLYVVIPTRRSTAEAFQILISHTFGDAGSPYLI  
GVISEAL

>Locus\_8363\_Transcript\_2/5\_Confidence\_0.500\_Length\_746|. |sp|Q9GQQ0| SPIN\_DROME Protein spinster OS=Drosophila melanogaster GN=spin PE=1 SV=1|e=1.13342E-93|from=1|to=741|frame=1|Fragment\_1

LFYFAIPVGSGLGYIAGSAMAHIGGSWHWALRVTPALGLVAVILIKFIQDPVRGHSEQSM  
DLEPTSYTDDLKSLKNSFMLSTAGFTCVAFVTGALAWWGPKFIHSGMILQPGNRDVTI  
NDVSFKFGIVAMLAGVTGVPLGSLIASRLRPLYPSCDPLICATGMLVAAPLLYFAAITPG  
YNTNLCFALMFFGQVSMNMNWPLVADMLLYVVIPTRRSTAEAFQILISHTFGDAGSPYLI  
GVISEAL

>Locus\_8363\_Transcript\_3/5\_Confidence\_0.500\_Length\_719|. |sp|Q9GQQ0| SPIN\_DROME Protein spinster OS=Drosophila melanogaster GN=spin PE=1 SV=1|e=8.12042E-94|from=1|to=714|frame=1|Fragment\_1

SGLGYIAGSAMAHIGGSWHWALRVTPALGLVAVILIKFIQDPVRGHSEQSM DLEPTSYTD  
DLKSLKNSFMLSTAGFTCVAFVTGALAWWGPKFIHSGMILQPGNRDVTINEVAFVGL  
LTMISGLVGVPLGSYLSQSLKTYPRADPLLCAAGLLISTPLLAAGMLVVQLNSTVAFIL  
MFFGELALNLNWAIVADILLYVVIPTRRSTAEAFQILISHTFGDAGSPYLIGVISEAL

>Locus\_128\_Transcript\_5/10\_Confidence\_0.148\_Length\_1034|UNIGENE REPRESENTATIVE TRANSCRIPT|sp|Q9V3L1|NDST\_DROME Bifunctional heparan sulfate N-deacetylase/N-sulfotransferase OS=Drosophila melanogaster GN=sfl PE=1 SV=1|e=4.74554E-73|from=3|to=719|frame=-1|Fragment\_1

FTMASDSSKFAGYAQWRSEESRVLLNGNVSGHRNSS

>Locus\_128\_Transcript\_5/10\_Confidence\_0.148\_Length\_1034|UNIGENE REPRESENTATIVE TRANSCRIPT|sp|Q9V3L1|NDST\_DROME Bifunctional heparan sulfate N-deacetylase/N-sulfotransferase OS=Drosophila melanogaster GN=sfl PE=1 SV=1|e=4.74554E-73|from=3|to=719|frame=-1|Fragment\_2 LCRQVN

>Locus\_128\_Transcript\_5/10\_Confidence\_0.148\_Length\_1034|UNIGENE REPRESENTATIVE TRANSCRIPT|sp|Q9V3L1|NDST\_DROME Bifunctional heparan sulfate N-deacetylase/N-sulfotransferase OS=Drosophila melanogaster GN=sfl PE=1 SV=1|e=4.74554E-73|from=3|to=719|frame=-1|Fragment\_3 LMSAITILCYAHYVMNSPFTSLIHRDTPVPTPLVQCRLGLA

>Locus\_128\_Transcript\_5/10\_Confidence\_0.148\_Length\_1034|UNIGENE REPRESENTATIVE TRANSCRIPT|sp|Q9V3L1|NDST\_DROME Bifunctional heparan sulfate N-deacetylase/N-sulfotransferase OS=Drosophila melanogaster GN=sfl PE=1 SV=1|e=4.74554E-73|from=3|to=719|frame=-1|Fragment\_4 KNDYQQSDHRSEARLRIDPKVLVVFVETTYTQLGRDIAELLVHTRIKYKLEVAGKSLPVLTLNLDKGRYGVIVFENIEKYFMMDKWNRELLDKYCREYSVGIIGFMKPSEETLVGAQLQGFP LFIHTNLRQLDASLNPKSPILRMVRSGE

>Locus\_128\_Transcript\_1/10\_Confidence\_0.148\_Length\_953|. |sp|Q9V3L1|NDST\_DROME Bifunctional heparan sulfate N-deacetylase/N-sulfotransferase OS=Drosophila melanogaster GN=sfl PE=1 SV=1|e=9.76967E-62|from=3|to=638|frame=-1|Fragment\_1 FTMASDSSKFAGYAQRSEESRVLLNGNVSGHRNSS

>Locus\_128\_Transcript\_1/10\_Confidence\_0.148\_Length\_953|. |sp|Q9V3L1|NDST\_DROME Bifunctional heparan sulfate N-deacetylase/N-sulfotransferase OS=Drosophila melanogaster GN=sfl PE=1 SV=1|e=9.76967E-62|from=3|to=638|frame=-1|Fragment\_2 LCRQVN

>Locus\_128\_Transcript\_1/10\_Confidence\_0.148\_Length\_953|. |sp|Q9V3L1|NDST\_DROME Bifunctional heparan sulfate N-deacetylase/N-sulfotransferase OS=Drosophila melanogaster GN=sfl PE=1 SV=1|e=9.76967E-62|from=3|to=638|frame=-1|Fragment\_3 LMSAITILCYAHYVMNSPFTSLIHRDTPVPTPLVQCRLGLA

>Locus\_128\_Transcript\_1/10\_Confidence\_0.148\_Length\_953|. |sp|Q9V3L1|NDST\_DROME Bifunctional heparan sulfate N-deacetylase/N-sulfotransferase OS=Drosophila melanogaster GN=sfl PE=1 SV=1|e=9.76967E-62|from=3|to=638|frame=-1|Fragment\_4 KNDYQQSDHRSEARLRIDPKVLVVFVETTYTQLGRDIAELLVHTRIKYKLEVAGKSLPVLTLNLDKGRYGVIVFENIEKYFMMDKWNRELLDKYCREYSVGIIGFMKPSEETLVGAQLQGFP L

>Locus\_28925\_Transcript\_1/1\_Confidence\_1.000\_Length\_275|UNIGENE REPRESENTATIVE TRANSCRIPT|sp|Q9V3X5|TMT2\_DROME Transmembrane and TPR repeat-containing protein CG4341 OS=Drosophila melanogaster GN=CG4341 PE=2 SV=1|e=2.5009E-23|from=9|to=275|frame=-1|Fragment\_1 GYHLVNVFLHVLSTFLVVRLTRTFLTNFTGVFVTGALFAVHPVHVEAVAGIVGRADLLAC CMQLGCFVLYEAHIRWRKIDDLRHWMALG

>Locus\_1484\_Transcript\_1/2\_Confidence\_0.800\_Length\_1879|UNIGENE REPRESENTATIVE TRANSCRIPT|sp|Q9V5E1|PAL1\_DROME Peptidyl-alpha-hydroxyglycine alpha-amidating lyase 1 OS=Drosophila melanogaster GN=Pal1 PE=1 SV=1|e=2.42497E-90|from=397|to=1413|frame=1|Fragment\_1 PVQQQLVDVENTLSSLNFSPTYVPSWPKISDSLQVSAVSLDSFGNVVLFHRGSRKWDAES FNKDEIFLQQLGPIPIENTILVLNSTTGDVSYEWGSHMFYMPHGLTVDYFNNIWIITDVAL HQVMKFSFNASTSTKPSLTLGKKFLPGNSLDRFCKPTSVAVMRSRSGDFVADGYCNSRIMK FSMNGEYLTSWGKSTRNN

>Locus\_1484\_Transcript\_1/2\_Confidence\_0.800\_Length\_1879|UNIGENE

REPRESENTATIVE TRANSCRIPT|sp|Q9V5E1|PAL1\_DROME Peptidyl-alpha-hydroxyglycine alpha-amidating lyase 1 OS=Drosophila melanogaster GN=Pal1 PE=1 SV=1|e=2.42497E-90|from=397|to=1413|frame=1|Fragment\_2 DRKPPPYNFRIPHALALAEDKDMLCVADRENGRVQCFNAINGSYIEKFQHPPIIGQRIFSV AYSSVNGGQLYVVNGPN

>Locus\_1484\_Transcript\_1/2\_Confidence\_0.800\_Length\_1879|UNIGENE REPRESENTATIVE TRANSCRIPT|sp|Q9V5E1|PAL1\_DROME Peptidyl-alpha-hydroxyglycine alpha-amidating lyase 1 OS=Drosophila melanogaster GN=Pal1 PE=1 SV=1|e=2.42497E-90|from=397|to=1413|frame=1|Fragment\_3 WMPYYNSVRGQFVINMTSGKIVSQFRAGSKDFQNPFDIAVSSDGKQAYVVEIDPYVIHKFE DNTL

>Locus\_1484\_Transcript\_2/2\_Confidence\_0.800\_Length\_1879|. |sp|Q9V5E1| PAL1\_DROME Peptidyl-alpha-hydroxyglycine alpha-amidating lyase 1 OS=Drosophila melanogaster GN=Pal1 PE=1 SV=1|e=2.42497E-90|from=397| to=1413|frame=1|Fragment\_1 PVQQLVDVENTLSSLNFSPTYVPSWPKISDSLQVSAVSLDSFGNVVLFHRGSRKWDAES FNKDEIFLQQLGPIPIENTILVLNSTTGDVSYEWGSHMFYMPHGLTVDYFNNIWITDVAL HQVMKFSFNASTSTKPSLTLGKFLPGNSLDRFCKPTSVAVMRSQDFVADGYCNSRIMK FSMNGEYLTSWGKSTRNN

>Locus\_1484\_Transcript\_2/2\_Confidence\_0.800\_Length\_1879|. |sp|Q9V5E1| PAL1\_DROME Peptidyl-alpha-hydroxyglycine alpha-amidating lyase 1 OS=Drosophila melanogaster GN=Pal1 PE=1 SV=1|e=2.42497E-90|from=397| to=1413|frame=1|Fragment\_2 DRKPPPYNFRIPHALALAEDKDMLCVADRENGRVQCFNAINGSYIEKFQHPPIIGQRIFSV AYSSVNGGQLYVVNGPN

>Locus\_1484\_Transcript\_2/2\_Confidence\_0.800\_Length\_1879|. |sp|Q9V5E1| PAL1\_DROME Peptidyl-alpha-hydroxyglycine alpha-amidating lyase 1 OS=Drosophila melanogaster GN=Pal1 PE=1 SV=1|e=2.42497E-90|from=397| to=1413|frame=1|Fragment\_3 WMPYYNSVRGQFVINMTSGKIVSQFRAGSKDFQNPFDIAVSSDGKQAYVVEIDPYVIHKFE DNTL

>Locus\_6536\_Transcript\_1/1\_Confidence\_1.000\_Length\_684|UNIGENE REPRESENTATIVE TRANSCRIPT|sp|Q9V5N8|STAN\_DROME Protocadherin-like wing polarity protein stan OS=Drosophila melanogaster GN=stan PE=1 SV=4|e=4.46772E-22|from=186|to=488|frame=3|Fragment\_1 YLPNITE

>Locus\_6536\_Transcript\_1/1\_Confidence\_1.000\_Length\_684|UNIGENE REPRESENTATIVE TRANSCRIPT|sp|Q9V5N8|STAN\_DROME Protocadherin-like wing polarity protein stan OS=Drosophila melanogaster GN=stan PE=1 SV=4|e=4.46772E-22|from=186|to=488|frame=3|Fragment\_2 AQNPPDLHVMNSPQLFPSVQSNPQYMKPIYAPKWSSKLPDSYL

>Locus\_6536\_Transcript\_1/1\_Confidence\_1.000\_Length\_684|UNIGENE REPRESENTATIVE TRANSCRIPT|sp|Q9V5N8|STAN\_DROME Protocadherin-like wing polarity protein stan OS=Drosophila melanogaster GN=stan PE=1 SV=4|e=4.46772E-22|from=186|to=488|frame=3|Fragment\_3 PYNKGRWSQDTGSDNEIQPNLVQSTLKNQSVTQSSMPLPNPDLTLDTNHVRK

>Locus\_26433\_Transcript\_1/1\_Confidence\_1.000\_Length\_271|. |sp|Q9V5N8| STAN\_DROME Protocadherin-like wing polarity protein stan OS=Drosophila melanogaster GN=stan PE=1 SV=4|e=4.14612E-26|from=6| to=254|frame=-3|Fragment\_1 IQKRVEDAKRWVSETYASFAIPTTDKQPWQSICLRKSQFINSLASFMPKSVEQYCKVTFID LNDDRFAVETQNFHLVARDDVCI

>Locus\_20402\_Transcript\_1/1\_Confidence\_1.000\_Length\_262|. |sp|Q9V5N8| STAN\_DROME Protocadherin-like wing polarity protein stan

OS=Drosophila melanogaster GN=stan PE=1 SV=4|e=1.34839E-16|from=63|to=254|frame=3|Fragment\_1  
NKLYGADVLISEGILQYLIAYELSQTGLNLSHSQDKDYIQNIVSVASNILDVRYEKEWNQ  
IAKL

>Locus\_6927\_Transcript\_1/1\_Confidence\_1.000\_Length\_676|UNIGENE  
REPRESENTATIVE TRANSCRIPT|sp|Q9V668|S61G1\_DROME Protein transport  
protein Sec61 gamma-1 subunit OS=Drosophila melanogaster GN=SEC61G1  
PE=3 SV=1|e=2.31513E-15|from=264|to=437|frame=3|Fragment\_1  
MDHVTKFIEPGRQFAKDSIRLVKRCTKPDRKEFQKIAIATA

>Locus\_6927\_Transcript\_1/1\_Confidence\_1.000\_Length\_676|UNIGENE  
REPRESENTATIVE TRANSCRIPT|sp|Q9V668|S61G1\_DROME Protein transport  
protein Sec61 gamma-1 subunit OS=Drosophila melanogaster GN=SEC61G1  
PE=3 SV=1|e=2.31513E-15|from=264|to=437|frame=3|Fragment\_2  
VKLIH

>Locus\_3215\_Transcript\_1/4\_Confidence\_0.700\_Length\_2763|UNIGENE  
REPRESENTATIVE TRANSCRIPT|sp|Q9V730|EXT1\_DROME Exostosin-1  
OS=Drosophila melanogaster GN=ttv PE=1 SV=1|e=0|from=217|to=2418|  
frame=-1|Fragment\_1  
MRAKKRYLLLIVSCAFLAYCYFGGYRLK

>Locus\_3215\_Transcript\_1/4\_Confidence\_0.700\_Length\_2763|UNIGENE  
REPRESENTATIVE TRANSCRIPT|sp|Q9V730|EXT1\_DROME Exostosin-1  
OS=Drosophila melanogaster GN=ttv PE=1 SV=1|e=0|from=217|to=2418|  
frame=-1|Fragment\_2  
SISKTLPYETLPSFVSV

>Locus\_3215\_Transcript\_1/4\_Confidence\_0.700\_Length\_2763|UNIGENE  
REPRESENTATIVE TRANSCRIPT|sp|Q9V730|EXT1\_DROME Exostosin-1  
OS=Drosophila melanogaster GN=ttv PE=1 SV=1|e=0|from=217|to=2418|  
frame=-1|Fragment\_3  
S

>Locus\_3215\_Transcript\_1/4\_Confidence\_0.700\_Length\_2763|UNIGENE  
REPRESENTATIVE TRANSCRIPT|sp|Q9V730|EXT1\_DROME Exostosin-1  
OS=Drosophila melanogaster GN=ttv PE=1 SV=1|e=0|from=217|to=2418|  
frame=-1|Fragment\_4  
PQAGSRPCRMETCFDFSRRCGEFRVYVYPQQDINE

>Locus\_3215\_Transcript\_1/4\_Confidence\_0.700\_Length\_2763|UNIGENE  
REPRESENTATIVE TRANSCRIPT|sp|Q9V730|EXT1\_DROME Exostosin-1  
OS=Drosophila melanogaster GN=ttv PE=1 SV=1|e=0|from=217|to=2418|  
frame=-1|Fragment\_5

ASTPISSSYMKVLSVIRE\$RYYPDPSRACLFILALDRTLDRDKLSSDFVRGMPGRLARLP  
YWNNGRNHLIFNLYSGSWPDYAERDLGFDPGYALLAQASMSVAHFRHGFDVSLPLFHRGH  
PERGGAPGNAQSNNFPANKKYLLAFKKGKRYVHGIGSETRNSLWHLHNENDMVLVTTCRHG  
KSWKDLKDERCEDNAEYDRYDYDVLLANSTFCLVPRGRRLLGSYRFLEALQAGCVPVLLS  
NAWALPFQQVIDWSQAVLWADERLLLQVPDLVRSVSADRVLALRQQTQVLWERYFSSIEK  
IVFTTLEIIRERLPGEPVRSGLVWNTNPGALLTLTRFSDSWARYPFYLDALGASPSAGFT  
AVIYCQLGAVTGGAPASVLQRLIRNVARSKSVQRIIIVWANEKSPARNRWPTPTSPL  
NILQAPVTLIY

>Locus\_3215\_Transcript\_1/4\_Confidence\_0.700\_Length\_2763|UNIGENE  
REPRESENTATIVE TRANSCRIPT|sp|Q9V730|EXT1\_DROME Exostosin-1  
OS=Drosophila melanogaster GN=ttv PE=1 SV=1|e=0|from=217|to=2418|  
frame=-1|Fragment\_6  
SR

>Locus\_3215\_Transcript\_1/4\_Confidence\_0.700\_Length\_2763|UNIGENE  
REPRESENTATIVE TRANSCRIPT|sp|Q9V730|EXT1\_DROME Exostosin-1  
OS=Drosophila melanogaster GN=ttv PE=1 SV=1|e=0|from=217|to=2418|

frame=-1|Fragment\_7  
RFLPHPLITTDAILSLDEDALLTTDEVDFAFSVWRNFPDRIVGYPARAHYWDDAKSTWGY  
TSKWTNEYSIVLTGAAFYHRYNELYTRWLSPLLHKTVEQSDNCEDILMNFLVAHVTRRP  
PIKVTQRKQYKEAPAGGARSPWNDPDHFIQRQSCLNNTFAAVFGYMPLLRSSLRLDPVLFK  
DPVSNLRKKYRQIELVGS  
>Locus\_3215\_Transcript\_2/4\_Confidence\_0.700\_Length\_2763|. |sp|Q9V730|  
EXT1\_DROME Exostosin-1 OS=Drosophila melanogaster GN=ttv PE=1 SV=1|  
e=0|from=217|to=2418|frame=-1|Fragment\_1  
MRAKKRYLLLIVSCAFLAYCYFGGYRLK  
>Locus\_3215\_Transcript\_2/4\_Confidence\_0.700\_Length\_2763|. |sp|Q9V730|  
EXT1\_DROME Exostosin-1 OS=Drosophila melanogaster GN=ttv PE=1 SV=1|  
e=0|from=217|to=2418|frame=-1|Fragment\_2  
SISKTLPTYETLPSFVSV  
>Locus\_3215\_Transcript\_2/4\_Confidence\_0.700\_Length\_2763|. |sp|Q9V730|  
EXT1\_DROME Exostosin-1 OS=Drosophila melanogaster GN=ttv PE=1 SV=1|  
e=0|from=217|to=2418|frame=-1|Fragment\_3  
S  
>Locus\_3215\_Transcript\_2/4\_Confidence\_0.700\_Length\_2763|. |sp|Q9V730|  
EXT1\_DROME Exostosin-1 OS=Drosophila melanogaster GN=ttv PE=1 SV=1|  
e=0|from=217|to=2418|frame=-1|Fragment\_4  
PQAGSRPCRMETCFDFSRGRGFRVYVYPQQDINE  
>Locus\_3215\_Transcript\_2/4\_Confidence\_0.700\_Length\_2763|. |sp|Q9V730|  
EXT1\_DROME Exostosin-1 OS=Drosophila melanogaster GN=ttv PE=1 SV=1|  
e=0|from=217|to=2418|frame=-1|Fragment\_5  
ASTPISSSYMKVLSVIRESTRYTPDPSRACLFILALDLDLDRDKLSSDFVRGMPGRLARLP  
YWNNGRNHLIFNLYSGSWPDYAERDLGFDPGYALLAQASMSVAHFRHGFVSLPLFHRGH  
PERGGAPGNAQSNFPANKKYLLAFKKGKRYVHGIGSETRNSLWHLHNENDMVLVTTCRHG  
KSWKDLKDERCEDNAEYDRYDYDVLLANSTFCLVPRGRRLGSYRFLEALQAGCVPVLLS  
NAWALPFQQVIDWSQAVLWADERLLLQVPDLVRSVSADRVLALRQQTQVLWERYFSSIEK  
IVFTTLEIIRERLPGEPVRSGLVWNTNPGALLTLTRFSDSWARYPFYLDALGASPSAGFT  
AVIYCQLGAVTGGAPASVLQRLIRNVARSKSVQRIIIVWANEKSPPARNRWPPTPTSVPL  
NILQAPVTLIY  
>Locus\_3215\_Transcript\_2/4\_Confidence\_0.700\_Length\_2763|. |sp|Q9V730|  
EXT1\_DROME Exostosin-1 OS=Drosophila melanogaster GN=ttv PE=1 SV=1|  
e=0|from=217|to=2418|frame=-1|Fragment\_6  
SR  
>Locus\_3215\_Transcript\_2/4\_Confidence\_0.700\_Length\_2763|. |sp|Q9V730|  
EXT1\_DROME Exostosin-1 OS=Drosophila melanogaster GN=ttv PE=1 SV=1|  
e=0|from=217|to=2418|frame=-1|Fragment\_7  
RFLPHPLITTDAILSLDEDALLTTDEVDFAFSVWRNFPDRIVGYPARAHYWDDAKSTWGY  
TSKWTNEYSIVLTGAAFYHRYNELYTRWLSPLLHKTVEQSDNCEDILMNFLVAHVTRRP  
PIKVTQRKQYKEAPAGGARSPWNDPDHFIQRQSCLNNTFAAVFGYMPLLRSSLRLDPVLFK  
DPVSNLRKKYRQIELVGS  
>Locus\_3215\_Transcript\_3/4\_Confidence\_0.700\_Length\_2763|. |sp|Q9V730|  
EXT1\_DROME Exostosin-1 OS=Drosophila melanogaster GN=ttv PE=1 SV=1|  
e=0|from=217|to=2418|frame=-1|Fragment\_1  
MRAKKRYLLLIVSCAFLAYCYFGGYRLK  
>Locus\_3215\_Transcript\_3/4\_Confidence\_0.700\_Length\_2763|. |sp|Q9V730|  
EXT1\_DROME Exostosin-1 OS=Drosophila melanogaster GN=ttv PE=1 SV=1|  
e=0|from=217|to=2418|frame=-1|Fragment\_2  
SISKTLPTYETLPSFVSV  
>Locus\_3215\_Transcript\_3/4\_Confidence\_0.700\_Length\_2763|. |sp|Q9V730|  
EXT1\_DROME Exostosin-1 OS=Drosophila melanogaster GN=ttv PE=1 SV=1|  
e=0|from=217|to=2418|frame=-1|Fragment\_3

S

>Locus\_3215\_Transcript\_3/4\_Confidence\_0.700\_Length\_2763|. |sp|Q9V730|  
EXT1\_DROME Exostosin-1 OS=Drosophila melanogaster GN=ttv PE=1 SV=1|  
e=0|from=217|to=2418|frame=-1|Fragment\_4  
PQAGSRPCRMETCFDFSRRCGEFRVYVYPQQDINE

>Locus\_3215\_Transcript\_3/4\_Confidence\_0.700\_Length\_2763|. |sp|Q9V730|  
EXT1\_DROME Exostosin-1 OS=Drosophila melanogaster GN=ttv PE=1 SV=1|  
e=0|from=217|to=2418|frame=-1|Fragment\_5

ASTPISSSYMKVLSVIRESTRYYTPDPSRACLFILALDTLDRDKLSSDFVRGMPGRLARLP  
YWNNGRNHLIFNLYSGSWPDYAERDLGFDPGYALLAQASMSVAHFRHGFDVSLPLFHRGH  
PERGGAPGNAQSNNFPANKKYLLAFKKGKRYVHGIGSETRNSLWHLHNENDMVLVTTCRHG  
KSWKDLKDERCEDNAEYDRYDYDVLLANSTFCLVPRGRRLGSYRFLEALQAGCVPVLLS  
NAWALPFQQVIDWSQAVLWADERLLLQVPDLVRSVSADRVLALRQQTQVLWERYFSSIEK  
IVFTTLEIIRERLPGEVRSGLVWNTNPGALLTLTRFSDSWARYPFYLDALGASPSAGFT  
AVIYCQLGAVTGGAPASVLQRLIRNVARSKSVQRIIIVWANEKSPPARNRWPPTPTSVPL  
NILQAPVTLIY

>Locus\_3215\_Transcript\_3/4\_Confidence\_0.700\_Length\_2763|. |sp|Q9V730|  
EXT1\_DROME Exostosin-1 OS=Drosophila melanogaster GN=ttv PE=1 SV=1|  
e=0|from=217|to=2418|frame=-1|Fragment\_6

SR

>Locus\_3215\_Transcript\_3/4\_Confidence\_0.700\_Length\_2763|. |sp|Q9V730|  
EXT1\_DROME Exostosin-1 OS=Drosophila melanogaster GN=ttv PE=1 SV=1|  
e=0|from=217|to=2418|frame=-1|Fragment\_7

RFLPHPLITTDAILSLDEDALLTTDEVDFAFSVWRNFPDRIVGYPARAHYWDDAKSTWGY  
TSKWTNEYSIVLTGAAFYHRYNELYTRWLSPLLHKTVEQSDNCEDILMNFLVAHVTRRP  
PIKVTQRKQYKEAPAGGARSPWNDPDHFIQRQSCLNTFAAVFGYMPLLRSSLRLDPVLFK  
DPVSNLRKKYRQIELVGS

>Locus\_3215\_Transcript\_4/4\_Confidence\_0.700\_Length\_2763|. |sp|Q9V730|  
EXT1\_DROME Exostosin-1 OS=Drosophila melanogaster GN=ttv PE=1 SV=1|  
e=0|from=217|to=2418|frame=-1|Fragment\_1

MRAKKRYLLLIVSCAFLAYCYFGGYRLK

>Locus\_3215\_Transcript\_4/4\_Confidence\_0.700\_Length\_2763|. |sp|Q9V730|  
EXT1\_DROME Exostosin-1 OS=Drosophila melanogaster GN=ttv PE=1 SV=1|  
e=0|from=217|to=2418|frame=-1|Fragment\_2

SISKTLPYETLPSFVSV

>Locus\_3215\_Transcript\_4/4\_Confidence\_0.700\_Length\_2763|. |sp|Q9V730|  
EXT1\_DROME Exostosin-1 OS=Drosophila melanogaster GN=ttv PE=1 SV=1|  
e=0|from=217|to=2418|frame=-1|Fragment\_3

S

>Locus\_3215\_Transcript\_4/4\_Confidence\_0.700\_Length\_2763|. |sp|Q9V730|  
EXT1\_DROME Exostosin-1 OS=Drosophila melanogaster GN=ttv PE=1 SV=1|  
e=0|from=217|to=2418|frame=-1|Fragment\_4

PQAGSRPCRMETCFDFSRRCGEFRVYVYPQQDINE

>Locus\_3215\_Transcript\_4/4\_Confidence\_0.700\_Length\_2763|. |sp|Q9V730|  
EXT1\_DROME Exostosin-1 OS=Drosophila melanogaster GN=ttv PE=1 SV=1|  
e=0|from=217|to=2418|frame=-1|Fragment\_5

ASTPISSSYMKVLSVIRESTRYYTPDPSRACLFILALDTLDRDKLSSDFVRGMPGRLARLP  
YWNNGRNHLIFNLYSGSWPDYAERDLGFDPGYALLAQASMSVAHFRHGFDVSLPLFHRGH  
PERGGAPGNAQSNNFPANKKYLLAFKKGKRYVHGIGSETRNSLWHLHNENDMVLVTTCRHG  
KSWKDLKDERCEDNAEYDRYDYDVLLANSTFCLVPRGRRLGSYRFLEALQAGCVPVLLS  
NAWALPFQQVIDWSQAVLWADERLLLQVPDLVRSVSADRVLALRQQTQVLWERYFSSIEK  
IVFTTLEIIRERLPGEVRSGLVWNTNPGALLTLTRFSDSWARYPFYLDALGASPSAGFT  
AVIYCQLGAVTGGAPASVLQRLIRNVARSKSVQRIIIVWANEKSPPARNRWPPTPTSVPL  
NILQAPVTLIY

>Locus\_3215\_Transcript\_4/4\_Confidence\_0.700\_Length\_2763|. |sp|Q9V730|  
EXT1\_DROME Exostosin-1 OS=Drosophila melanogaster GN=ttv PE=1 SV=1|  
e=0|from=217|to=2418|frame=-1|Fragment\_6  
SR

>Locus\_3215\_Transcript\_4/4\_Confidence\_0.700\_Length\_2763|. |sp|Q9V730|  
EXT1\_DROME Exostosin-1 OS=Drosophila melanogaster GN=ttv PE=1 SV=1|  
e=0|from=217|to=2418|frame=-1|Fragment\_7  
RFLPHPLITTDAILSLDEDALLTTDEVDFAFSVWRNFPDRIVGYPARAHYWDDAKSTWGY  
TSKWTNEYSIVLTGAAFYHRYYNELYTRWLSPLLHKTVEQSDNCEDILMNFLVAHVTRRP  
PIKVTQRKQYKEAPAGGARSPWNDPDHFIQRQSCLNFFAAVFGYMPLLRSSLRLDPVLFK  
DPVSNLRKKYRQIELVGS

>Locus\_1200\_Transcript\_3/8\_Confidence\_0.556\_Length\_1274|UNIGENE  
REPRESENTATIVE TRANSCRIPT|sp|Q9V7S5|PICO\_DROME Putative inorganic  
phosphate cotransporter OS=Drosophila melanogaster GN=Picot PE=1  
SV=1|e=3.263E-154|from=229|to=1272|frame=1|Fragment\_1  
RPEGWWGTRHFVTFMLFLGMANAYVMRTNMSVAIVAMVNHTAVGVGH

>Locus\_1200\_Transcript\_3/8\_Confidence\_0.556\_Length\_1274|UNIGENE  
REPRESENTATIVE TRANSCRIPT|sp|Q9V7S5|PICO\_DROME Putative inorganic  
phosphate cotransporter OS=Drosophila melanogaster GN=Picot PE=1  
SV=1|e=3.263E-154|from=229|to=1272|frame=1|Fragment\_2  
EIVDDECPDPTYGNHTSTVQDGEFIWSTLSQILSSFFWGYVITQIPFGILSKRYGAKW  
FLGVGMMINSLFGLLVPAAREGGSGWLI AVRFIQGLGEGPIVPCTHAMLAKWIPPNERS  
RMGAAVYAGA QFGTVVSMPLSGLLSEYGFDDGGWPSIFYVFGLVGAIWSAAFLLWVHEDPE  
VHPTIDQREKKYIVSSLWGTAGTSTPPIPFKKILLSLPFWAIMFAHMGQNYGYETLMTL  
PTYMKQVLRFSIKDNGILSALPYLAMWLFMSFISVIADWLLTSERLTHTSRKIINGIGQ  
F

>Locus\_1200\_Transcript\_4/8\_Confidence\_0.500\_Length\_1079|. |sp|Q9V7S5|  
PICO\_DROME Putative inorganic phosphate cotransporter OS=Drosophila  
melanogaster GN=Picot PE=1 SV=1|e=2.0042E-154|from=31|to=1077|  
frame=1|Fragment\_1  
KKPEGWWGTRHFVTFMLFLGMANAYVMRTNMSVAIVAMVNHTAVGVGH

>Locus\_1200\_Transcript\_4/8\_Confidence\_0.500\_Length\_1079|. |sp|Q9V7S5|  
PICO\_DROME Putative inorganic phosphate cotransporter OS=Drosophila  
melanogaster GN=Picot PE=1 SV=1|e=2.0042E-154|from=31|to=1077|  
frame=1|Fragment\_2  
EIVDDECPDPTYGNHTSTVQDGEFIWSTLSQILSSFFWGYVITQIPFGILSKRYGAKW  
FLGVGMMINSLFGLLVPAAREGGSGWLI AVRFIQGLGEGPIVPCTHAMLAKWIPPNERS  
RMGAAVYAGA QFGTVVSMPLSGLLSEYGFDDGGWPSIFYVFGLVGAIWSAAFLLWVHEDPE  
VHPTIDQREKKYIVSSLWGTAGTSTPPIPFKKILLSLPFWAIMFAHMGQNYGYETLMTL  
PTYMKQVLRFSIKDNGILSALPYLAMWLFMSFISVIADWLLTSERLTHTSRKIINGIGQ  
F

>Locus\_1200\_Transcript\_5/8\_Confidence\_0.556\_Length\_1079|. |sp|Q9V7S5|  
PICO\_DROME Putative inorganic phosphate cotransporter OS=Drosophila  
melanogaster GN=Picot PE=1 SV=1|e=2.0042E-154|from=31|to=1077|  
frame=1|Fragment\_1  
KKPEGWWGTRHFVTFMLFLGMANAYVMRTNMSVAIVAMVNHTAVGVGH

>Locus\_1200\_Transcript\_5/8\_Confidence\_0.556\_Length\_1079|. |sp|Q9V7S5|  
PICO\_DROME Putative inorganic phosphate cotransporter OS=Drosophila  
melanogaster GN=Picot PE=1 SV=1|e=2.0042E-154|from=31|to=1077|  
frame=1|Fragment\_2  
EIVDDECPDPTYGNHTSTVQDGEFIWSTLSQILSSFFWGYVITQIPFGILSKRYGAKW  
FLGVGMMINSLFGLLVPAAREGGSGWLI AVRFIQGLGEGPIVPCTHAMLAKWIPPNERS  
RMGAAVYAGA QFGTVVSMPLSGLLSEYGFDDGGWPSIFYVFGLVGAIWSAAFLLWVHEDPE  
VHPTIDQREKKYIVSSLWGTAGTSTPPIPFKKILLSLPFWAIMFAHMGQNYGYETLMTL

PTYMKQVLRFSIKDNGILSALPYLAMWLFMSFISVIADWLLTSERLTHTSLRKIINGIGQ  
F  
>Locus\_1200\_Transcript\_6/8\_Confidence\_0.611\_Length\_1079|. |sp|Q9V7S5|  
PICO\_DROME Putative inorganic phosphate cotransporter OS=Drosophila  
melanogaster GN=Picot PE=1 SV=1|e=2.0042E-154|from=31|to=1077|  
frame=1|Fragment\_1  
KKPEGWWGTRHFVTFMLFLGMANAYVMRTNMSVAIVAMVNHTAVGVGH  
>Locus\_1200\_Transcript\_6/8\_Confidence\_0.611\_Length\_1079|. |sp|Q9V7S5|  
PICO\_DROME Putative inorganic phosphate cotransporter OS=Drosophila  
melanogaster GN=Picot PE=1 SV=1|e=2.0042E-154|from=31|to=1077|  
frame=1|Fragment\_2  
EIVDDECPDPTDYGNGHTSTVQDGEFIWSTSLQSQILSSFFWGYVITQIPFGILSKRYGAKW  
FLGVGMMINSLFGLLVPVAAREGGSGWLIAVRFIQGLGEGPIVPCTHAMLAKWIPPNERS  
RMGAAVYAGAQFGTVVSMPLSGLLSEYGFDDGGWPSIFYVFGLVGAIWSAAFLLWVHEDPE  
VHPTIDQREKKYIVSSLWGTAGTSTPPIPFFKILLSLPFWAIMFAHMGQNYGYETLMTEL  
PTYMKQVLRFSIKDNGILSALPYLAMWLFMSFISVIADWLLTSERLTHTSLRKIINGIGQ  
F  
>Locus\_1200\_Transcript\_8/8\_Confidence\_0.556\_Length\_1079|. |sp|Q9V7S5|  
PICO\_DROME Putative inorganic phosphate cotransporter OS=Drosophila  
melanogaster GN=Picot PE=1 SV=1|e=2.0042E-154|from=31|to=1077|  
frame=1|Fragment\_1  
KKPEGWWGTRHFVTFMLFLGMANAYVMRTNMSVAIVAMVNHTAVGVGH  
>Locus\_1200\_Transcript\_8/8\_Confidence\_0.556\_Length\_1079|. |sp|Q9V7S5|  
PICO\_DROME Putative inorganic phosphate cotransporter OS=Drosophila  
melanogaster GN=Picot PE=1 SV=1|e=2.0042E-154|from=31|to=1077|  
frame=1|Fragment\_2  
EIVDDECPDPTDYGNGHTSTVQDGEFIWSTSLQSQILSSFFWGYVITQIPFGILSKRYGAKW  
FLGVGMMINSLFGLLVPVAAREGGSGWLIAVRFIQGLGEGPIVPCTHAMLAKWIPPNERS  
RMGAAVYAGAQFGTVVSMPLSGLLSEYGFDDGGWPSIFYVFGLVGAIWSAAFLLWVHEDPE  
VHPTIDQREKKYIVSSLWGTAGTSTPPIPFFKILLSLPFWAIMFAHMGQNYGYETLMTEL  
PTYMKQVLRFSIKDNGILSALPYLAMWLFMSFISVIADWLLTSERLTHTSLRKIINGIGQ  
F  
>Locus\_1200\_Transcript\_2/8\_Confidence\_0.500\_Length\_1079|. |sp|Q9V7S5|  
PICO\_DROME Putative inorganic phosphate cotransporter OS=Drosophila  
melanogaster GN=Picot PE=1 SV=1|e=1.2991E-153|from=49|to=1077|  
frame=1|Fragment\_1  
WGTRHFVTFMLFLGMANAYVMRTNMSVAIVAMVNHTAVGVGH  
>Locus\_1200\_Transcript\_2/8\_Confidence\_0.500\_Length\_1079|. |sp|Q9V7S5|  
PICO\_DROME Putative inorganic phosphate cotransporter OS=Drosophila  
melanogaster GN=Picot PE=1 SV=1|e=1.2991E-153|from=49|to=1077|  
frame=1|Fragment\_2  
EIVDDECPDPTDYGNGHTSTVQDGEFIWSTSLQSQILSSFFWGYVITQIPFGILSKRYGAKW  
FLGVGMMINSLFGLLVPVAAREGGSGWLIAVRFIQGLGEGPIVPCTHAMLAKWIPPNERS  
RMGAAVYAGAQFGTVVSMPLSGLLSEYGFDDGGWPSIFYVFGLVGAIWSAAFLLWVHEDPE  
VHPTIDQREKKYIVSSLWGTAGTSTPPIPFFKILLSLPFWAIMFAHMGQNYGYETLMTEL  
PTYMKQVLRFSIKDNGILSALPYLAMWLFMSFISVIADWLLTSERLTHTSLRKIINGIGQ  
F  
>Locus\_1200\_Transcript\_1/8\_Confidence\_0.167\_Length\_272|. |sp|Q9V7S5|  
PICO\_DROME Putative inorganic phosphate cotransporter OS=Drosophila  
melanogaster GN=Picot PE=1 SV=1|e=2.33668E-37|from=4|to=270|frame=1|  
Fragment\_1  
ILLSLPFWAIMFAHMGQNYGYETLMTELPTYMKQVLRFSIKDNGILSALPYLAMWLFMSF  
ISVIADWLLTSERLTHTSLRKIINGIGQF  
>Locus\_1695\_Transcript\_1/7\_Confidence\_0.667\_Length\_2073|UNIGENE

REPRESENTATIVE TRANSCRIPT|sp|Q9V7Y2|SGPL\_DROME Sphingosine-1-phosphate lyase OS=Drosophila melanogaster GN=Sply PE=2 SV=1|e=0|from=172|to=1755|frame=1|Fragment\_1

INARLASKEPWQIIAITATSVISFLWLHDLLTADEGIKTRLLKSLFKWAKKIPYVKKRID  
DELNKISAQFDKDIQKRMQDVPYITTLPEQGLSDEEIVKMAKSYLNLGTYKWKKEGRVSGA  
VYYYDPELIELNTKIYGMTSYTNPLHPDVFPVSKMEAEVVRITAKLFHGGPNACGTMTT  
GGTESIIMACKAYRDYARE

>Locus\_1695\_Transcript\_1/7\_Confidence\_0.667\_Length\_2073|UNIGENE

REPRESENTATIVE TRANSCRIPT|sp|Q9V7Y2|SGPL\_DROME Sphingosine-1-phosphate lyase OS=Drosophila melanogaster GN=Sply PE=2 SV=1|e=0|from=172|to=1755|frame=1|Fragment\_2

RGITKPNIVMPVTAHSGFDKAAQYLGLGVRTVRVDPETTLVLDKAMKRAINGNTCMLVAS  
APNFPYGTMDVQVQVAELGLKYNIPVHVDACLGGFVIAFMRKAGFELPPDFEVEGVTSI  
SADTHKYGFAPKGSSVILYSDKKYRDHQFVTTDWPGGVYGSPTVNGSRTGGIIACWST  
LLRFGETGYIDATKKIIDTTKYVEKEIRKIDEVFIFGKPATTVVALGSKVFDIYHLADKL  
GGMGWLSLNLQFPSGIHICITHVHTQNGVADQFLDDMKSCIAEIMKNPSAPVEGKMAIYG  
MAQSVPRSTVTAFTKCYINSMYYTPADK

>Locus\_1695\_Transcript\_2/7\_Confidence\_0.611\_Length\_2073|. |sp|Q9V7Y2|

SGPL\_DROME Sphingosine-1-phosphate lyase OS=Drosophila melanogaster GN=Sply PE=2 SV=1|e=0|from=172|to=1755|frame=1|Fragment\_1

INARLASKEPWQIIAITATSVISFLWLHDLLTADEGIKTRLLKSLFKWAKKIPYVKKRID  
DELNKISAQFDKDIQKRMQDVPYITTLPEQGLSDEEIVKMAKSYLNLGTYKWKKEGRVSGA  
VYYYDPELIELNTKIYGMTSYTNPLHPDVFPVSKMEAEVVRITAKLFHGGPNACGTMTT  
GGTESIIMACKAYRDYARE

>Locus\_1695\_Transcript\_2/7\_Confidence\_0.611\_Length\_2073|. |sp|Q9V7Y2|

SGPL\_DROME Sphingosine-1-phosphate lyase OS=Drosophila melanogaster GN=Sply PE=2 SV=1|e=0|from=172|to=1755|frame=1|Fragment\_2

RGITKPNIVMPVTAHSGFDKAAQYLGLGVRTVRVDPETTLVLDKAMKRAINGNTCMLVAS  
APNFPYGTMDVQVQVAKLGLKYNIPVHVDACLGGFVIAFMRKAGFELPPDFEVEGVTSI  
SADTHKYGFAPKGSSVILYSDKKYRDHQFVTTDWPGGVYGSPTVNGSRTGGIIACWST  
LLRFGETGYIDATKKIIDTTKYVEKEIRKIDEVFIFGKPATTVVALGSKVFDIYHLADKL  
GGMGWLSLNLQFPSGIHICITHVHTQNGVADQFLDDMKSCIAEIMKNPSAPVEGKMAIYG  
MAQSVPRSTVTAFTKCYINSMYYTPADK

>Locus\_1695\_Transcript\_3/7\_Confidence\_0.667\_Length\_2073|. |sp|Q9V7Y2|

SGPL\_DROME Sphingosine-1-phosphate lyase OS=Drosophila melanogaster GN=Sply PE=2 SV=1|e=0|from=172|to=1755|frame=1|Fragment\_1

INARLASKEPWQIIAITATSVISFLWLHDLLTADEGIKTRLLKSLFKWAKKIPYVKKRID  
DELNKISAQFDKDIQKRMQDVPYITTLPEQGLSDEEIVKMAKSYLNLGTYKWKKEGRVSGA  
VYYYDPELIELNTKIYGMTSYTNPLHPDVFPVSKMEAEVVRITAKLFHGGPNACGTMTT  
GGTESIIMACKAYRDYARE

>Locus\_1695\_Transcript\_3/7\_Confidence\_0.667\_Length\_2073|. |sp|Q9V7Y2|

SGPL\_DROME Sphingosine-1-phosphate lyase OS=Drosophila melanogaster GN=Sply PE=2 SV=1|e=0|from=172|to=1755|frame=1|Fragment\_2

RGITKPNIVMPVTAHSGFDKAAQYLGLGVRTVRVDPETTLVLDKAMKRAINGNTCMLVAS  
APNFPYGTMDVQVQVAELGLKYNIPVHVDACLGGFVIAFMRKAGFELPPDFEVEGVTSI  
SADTHKYGFAPKGSSVILYSDKKYRDHQFVTTDWPGGVYGSPTVNGSRTGGIIACWST  
LLRFGETGYIDATKKIIDTTKYVEKEIRKIDEVFIFGKPATTVVALGSKVFDIYHLADKL  
GGMGWLSLNLQFPSGIHICITHVHTQNGVADQFLDDMKSCIAEIMKNPSAPVEGKMAIYG  
MAQSVPRSTVTAFTKCYINSMYYTPADK

>Locus\_1695\_Transcript\_5/7\_Confidence\_0.611\_Length\_2073|. |sp|Q9V7Y2|

SGPL\_DROME Sphingosine-1-phosphate lyase OS=Drosophila melanogaster GN=Sply PE=2 SV=1|e=0|from=172|to=1755|frame=1|Fragment\_1

INARLASKEPWQIIAITATSVISFLWLHDLLTADEGIKTRLLKSLFKWAKKIPYVKKRID  
DELNKISAQFDKDIQKRMQDVPYITTLPEQGLSDEEIVKMAKSYLNLGTYKWKKEGRVSGA

VYYYDPELIELNTKIYGMTSYTNPLHPDVFPVSKMEAEVVRITAKLFHGPNACGTMTT  
GGTESIIMACKAYRDYARE  
>Locus\_1695\_Transcript\_5/7\_Confidence\_0.611\_Length\_2073|. |sp|Q9V7Y2|  
SGPL\_DROME Sphingosine-1-phosphate lyase OS=Drosophila melanogaster  
GN=Sply PE=2 SV=1|e=0|from=172|to=1755|frame=1|Fragment\_2  
RGITKPNIVMPVTAHSGFDKAAQYLGLGVRTVRVDPETTLVLDLKAMKRAINGNTCMLVAS  
APNFPYGTMDVQVAELGLKYNIPVHVDACLGGFVIAFMRKAGFELPPDFEVEGVTSI  
SADTHKYGFAPKGSSVILYSDKKYRDHQFVVTTDWPGGVYGSPTVNGSRTGGIIACWST  
LLRFGETGYIDATKKIIDTTKYVEKEIRKIDEVFIFGKPATTVVALGSKVFDIYHLADKL  
GGMGWLSLNLQFPSGIHICITHVHTQNGVADQFLDDMKSCIAEIMKNPSAPVEGKMAIYG  
MAQSVDPDRSTVTAFTKCYINSMYYTPADK  
>Locus\_1695\_Transcript\_6/7\_Confidence\_0.556\_Length\_2073|. |sp|Q9V7Y2|  
SGPL\_DROME Sphingosine-1-phosphate lyase OS=Drosophila melanogaster  
GN=Sply PE=2 SV=1|e=0|from=172|to=1755|frame=1|Fragment\_1  
INARLASKEPWQIIAITATSVISFLWLHDLLTADEGIKTRLLKSLFKWAKKIPYVKKCIN  
DELNKISAQFDKDIQKRMQDVPYITTLPEQGLSDEEIVKMAKSYLNLGTYKWKKEGRVSGA  
VYYYDPELIELNTKIYGMTSYTNPLHPDVFPVSKMEAEVVRITAKLFHGPNACGTMTT  
GGTESIIMACKAYRDYARE  
>Locus\_1695\_Transcript\_6/7\_Confidence\_0.556\_Length\_2073|. |sp|Q9V7Y2|  
SGPL\_DROME Sphingosine-1-phosphate lyase OS=Drosophila melanogaster  
GN=Sply PE=2 SV=1|e=0|from=172|to=1755|frame=1|Fragment\_2  
RGITKPNIVMPVTAHSGFDKAAQYLGLGVRTVRVDPETTLVLDLKAMKRAINGNTCMLVAS  
APNFPYGTMDVQVAELGLKYNIPVHVDACLGGFVIAFMRKAGFELPPDFEVEGVTSI  
SADTHKYGFAPKGSSVILYSDKKYRDHQFVVTTDWPGGVYGSPTVNGSRTGGIIACWST  
LLRFGETGYIDATKKIIDTTKYVEKEIRKIDEVFIFGKPATTVVALGSKVFDIYHLADKL  
GGMGWLSLNLQFPSGIHICITHVHTQNGVADQFLDDMKSCIAEIMKNPSAPVEGKMAIYG  
MAQSVDPDRSTVTAFTKCYINSMYYTPADK  
>Locus\_1695\_Transcript\_7/7\_Confidence\_0.667\_Length\_2073|. |sp|Q9V7Y2|  
SGPL\_DROME Sphingosine-1-phosphate lyase OS=Drosophila melanogaster  
GN=Sply PE=2 SV=1|e=0|from=172|to=1755|frame=1|Fragment\_1  
INARLASKEPWQIIAITATSVISFLWLHDLLTADEGIKTRLLKSLFKWAKKIPYVKKRID  
DELNKISAQFDKDIQKRMQDVPYITTLPEQGLSDEEIVKMAKSYLNLGTYKWKKEGRVSGA  
VYYYDPELIELNTKIYGMTSYTNPLHPDVFPVSKMEAEVVRITAKLFHGPNACGTMTT  
GGTESIIMACKAYRDYARE  
>Locus\_1695\_Transcript\_7/7\_Confidence\_0.667\_Length\_2073|. |sp|Q9V7Y2|  
SGPL\_DROME Sphingosine-1-phosphate lyase OS=Drosophila melanogaster  
GN=Sply PE=2 SV=1|e=0|from=172|to=1755|frame=1|Fragment\_2  
RGITKPNIVMPVTAHSGFDKAAQYLGLGVRTVRVDPETTLVLDLKAMKRAINGNTCMLVAS  
APNFPYGTMDVQVAELGLKYNIPVHVDACLGGFVIAFMRKAGFELPPDFEVEGVTSI  
SADTHKYGFAPKGSSVILYSDKKYRDHQFVVTTDWPGGVYGSPTVNGSRTGGIIACWST  
LLRFGETGYIDATKKIIDTTKYVEKEIRKIDEVFIFGKPATTVVALGSKVFDIYHLADKL  
GGMGWLSLNLQFPSGIHICITHVHTQNGVADQFLDDMKSCIAEIMKNPSAPVEGKMAIYG  
MAQSVDPDRSTVTAFTKCYINSMYYTPADK  
>Locus\_1695\_Transcript\_4/7\_Confidence\_0.667\_Length\_1894|. |sp|Q9V7Y2|  
SGPL\_DROME Sphingosine-1-phosphate lyase OS=Drosophila melanogaster  
GN=Sply PE=2 SV=1|e=0|from=172|to=1755|frame=1|Fragment\_1  
INARLASKEPWQIIAITATSVISFLWLHDLLTADEGIKTRLLKSLFKWAKKIPYVKKRID  
DELNKISAQFDKDIQKRMQDVPYITTLPEQGLSDEEIVKMAKSYLNLGTYKWKKEGRVSGA  
VYYYDPELIELNTKIYGMTSYTNPLHPDVFPVSKMEAEVVRITAKLFHGPNACGTMTT  
GGTESIIMACKAYRDYARE  
>Locus\_1695\_Transcript\_4/7\_Confidence\_0.667\_Length\_1894|. |sp|Q9V7Y2|  
SGPL\_DROME Sphingosine-1-phosphate lyase OS=Drosophila melanogaster  
GN=Sply PE=2 SV=1|e=0|from=172|to=1755|frame=1|Fragment\_2  
RGITKPNIVMPVTAHSGFDKAAQYLGLGVRTVRVDPETTLVLDLKAMKRAINGNTCMLVAS

APNFPYGTMDVQVAELGLKYNIPVHVDACLGGFVIAFMRKAGFELPPFD FEVEGVTSI  
SADTHKYGFAPKGSSVILYSDKKYRDHQFVVTDDWPGGVYGSPTVNGSRTGGIIACWST  
LLRFGETGYIDATKKIIDTTKYVEKEIRKIDEVFIFGKPATTVVALGSKVFDIYHLADKL  
GGMGWLSNLVQFPSGIHICITHVHTQNGVADQFLDDMKSCIAEIMKNPSAPVEGKMAIYG  
MAQSVPRSTVTAFTKCYINSMYYTPADK

>Locus\_4149\_Transcript\_2/4\_Confidence\_0.700\_Length\_2043|UNIGENE  
REPRESENTATIVE TRANSCRIPT|sp|Q9VAF0|Y816\_DROME Uncharacterized  
protein CG7816 OS=Drosophila melanogaster GN=CG7816 PE=2 SV=1|  
e=5.38886E-83|from=290|to=1429|frame=-3|Fragment\_1  
NSSIWESDSAFRFIYTDLVMEYIPEYFKDWQYHPWIF

>Locus\_4149\_Transcript\_2/4\_Confidence\_0.700\_Length\_2043|UNIGENE  
REPRESENTATIVE TRANSCRIPT|sp|Q9VAF0|Y816\_DROME Uncharacterized  
protein CG7816 OS=Drosophila melanogaster GN=CG7816 PE=2 SV=1|  
e=5.38886E-83|from=290|to=1429|frame=-3|Fragment\_2

L

>Locus\_4149\_Transcript\_2/4\_Confidence\_0.700\_Length\_2043|UNIGENE  
REPRESENTATIVE TRANSCRIPT|sp|Q9VAF0|Y816\_DROME Uncharacterized  
protein CG7816 OS=Drosophila melanogaster GN=CG7816 PE=2 SV=1|  
e=5.38886E-83|from=290|to=1429|frame=-3|Fragment\_3

K

>Locus\_4149\_Transcript\_2/4\_Confidence\_0.700\_Length\_2043|UNIGENE  
REPRESENTATIVE TRANSCRIPT|sp|Q9VAF0|Y816\_DROME Uncharacterized  
protein CG7816 OS=Drosophila melanogaster GN=CG7816 PE=2 SV=1|  
e=5.38886E-83|from=290|to=1429|frame=-3|Fragment\_4

LLRVLLSFAVGGLLGDVFLHLLPEAWENYSNKGRLVVMYEFVDSGGGSPSMTCGCWVLA  
GLLLFTMVEKLFAGYMEDDDVSEEKTERKRKMSKINCLIKNNNVLRARNENGRFSTSKC  
SGGQNGKMCIDIEVINGAIKNGCCMVEELEKEAVSNKS

>Locus\_4149\_Transcript\_2/4\_Confidence\_0.700\_Length\_2043|UNIGENE  
REPRESENTATIVE TRANSCRIPT|sp|Q9VAF0|Y816\_DROME Uncharacterized  
protein CG7816 OS=Drosophila melanogaster GN=CG7816 PE=2 SV=1|  
e=5.38886E-83|from=290|to=1429|frame=-3|Fragment\_5

KHVSGLNLMANSIDNFTHGLAVGGSFIVSFKLGILTTFAILVHEIPHEVGDFAILLRSG  
FSRWDAAR

>Locus\_4149\_Transcript\_2/4\_Confidence\_0.700\_Length\_2043|UNIGENE  
REPRESENTATIVE TRANSCRIPT|sp|Q9VAF0|Y816\_DROME Uncharacterized  
protein CG7816 OS=Drosophila melanogaster GN=CG7816 PE=2 SV=1|  
e=5.38886E-83|from=290|to=1429|frame=-3|Fragment\_6

GSRATSAMEARTCWIMPFTAGGFLHISLVTVLPDLLQERDPKESIKQFGALIGGIVLMAS  
LTTLLE

>Locus\_4149\_Transcript\_4/4\_Confidence\_0.600\_Length\_1962|. |sp|Q9VAF0|  
Y816\_DROME Uncharacterized protein CG7816 OS=Drosophila melanogaster  
GN=CG7816 PE=2 SV=1|e=5.12996E-83|from=290|to=1429|frame=-3|  
Fragment\_1

NSSIWESDSAFRFIYTDLVMEYIPEYFKDWQYHPWIF

>Locus\_4149\_Transcript\_4/4\_Confidence\_0.600\_Length\_1962|. |sp|Q9VAF0|  
Y816\_DROME Uncharacterized protein CG7816 OS=Drosophila melanogaster  
GN=CG7816 PE=2 SV=1|e=5.12996E-83|from=290|to=1429|frame=-3|  
Fragment\_2

L

>Locus\_4149\_Transcript\_4/4\_Confidence\_0.600\_Length\_1962|. |sp|Q9VAF0|  
Y816\_DROME Uncharacterized protein CG7816 OS=Drosophila melanogaster  
GN=CG7816 PE=2 SV=1|e=5.12996E-83|from=290|to=1429|frame=-3|  
Fragment\_3

K

>Locus\_4149\_Transcript\_4/4\_Confidence\_0.600\_Length\_1962|. |sp|Q9VAF0|  
Y816\_DROME Uncharacterized protein CG7816 OS=Drosophila melanogaster  
GN=CG7816 PE=2 SV=1|e=5.12996E-83|from=290|to=1429|frame=-3|

Fragment\_4

LLRVLLSFAVGGLLDVFLHLLPEAWENYSNKGERLVVMYEFVDSGGGSPSMTCGCWVLA  
GLLLFTMVEKLFAGYMEDDDVSEEKTERKRKMSKINCLIKNNNVLRARNENGRFSTSKC  
SGGQNGKMCIDIEVINGAIKNGCCMVEELEKEAVSNKS

>Locus\_4149\_Transcript\_4/4\_Confidence\_0.600\_Length\_1962|. |sp|Q9VAF0|  
Y816\_DROME Uncharacterized protein CG7816 OS=Drosophila melanogaster  
GN=CG7816 PE=2 SV=1|e=5.12996E-83|from=290|to=1429|frame=-3|

Fragment\_5

KHVSGLNLMANSIDNFTHGLAVGGSFIVSFKLGILTTFAILVHEIPHEVGDFAILLRSG  
FSRWDAAR

>Locus\_4149\_Transcript\_4/4\_Confidence\_0.600\_Length\_1962|. |sp|Q9VAF0|  
Y816\_DROME Uncharacterized protein CG7816 OS=Drosophila melanogaster  
GN=CG7816 PE=2 SV=1|e=5.12996E-83|from=290|to=1429|frame=-3|

Fragment\_6

GSRATSAMEARTCWIMPFTAGGFLHISLVTVLPDLLQERDPKESIKQFGALIGGIVLMAS  
LTTLLE

>Locus\_4149\_Transcript\_3/4\_Confidence\_0.600\_Length\_1932|. |sp|Q9VAF0|  
Y816\_DROME Uncharacterized protein CG7816 OS=Drosophila melanogaster  
GN=CG7816 PE=2 SV=1|e=1.57328E-84|from=290|to=1399|frame=-3|

Fragment\_1

NSSIWESDSAFRFIYTDLVMEYIPEYFKDWQYHPWIF

>Locus\_4149\_Transcript\_3/4\_Confidence\_0.600\_Length\_1932|. |sp|Q9VAF0|  
Y816\_DROME Uncharacterized protein CG7816 OS=Drosophila melanogaster  
GN=CG7816 PE=2 SV=1|e=1.57328E-84|from=290|to=1399|frame=-3|

Fragment\_2

L

>Locus\_4149\_Transcript\_3/4\_Confidence\_0.600\_Length\_1932|. |sp|Q9VAF0|  
Y816\_DROME Uncharacterized protein CG7816 OS=Drosophila melanogaster  
GN=CG7816 PE=2 SV=1|e=1.57328E-84|from=290|to=1399|frame=-3|

Fragment\_3

K

>Locus\_4149\_Transcript\_3/4\_Confidence\_0.600\_Length\_1932|. |sp|Q9VAF0|  
Y816\_DROME Uncharacterized protein CG7816 OS=Drosophila melanogaster  
GN=CG7816 PE=2 SV=1|e=1.57328E-84|from=290|to=1399|frame=-3|

Fragment\_4

LLRVLLSFAVGGLLDVFLHLLPEAWENYSNKGDSSGGGSPSMTCGCWVLAGLLLFTMVEK  
LFAGYMEDDDVSEEKTERKRKMSKINCLIKNNNVLRARNENGRFSTSKCSGGQNGKMCID  
IEVINGAIKNGCCMVEELEKEAVSNKS

>Locus\_4149\_Transcript\_3/4\_Confidence\_0.600\_Length\_1932|. |sp|Q9VAF0|  
Y816\_DROME Uncharacterized protein CG7816 OS=Drosophila melanogaster  
GN=CG7816 PE=2 SV=1|e=1.57328E-84|from=290|to=1399|frame=-3|

Fragment\_5

KHVSGLNLMANSIDNFTHGLAVGGSFIVSFKLGILTTFAILVHEIPHEVGDFAILLRSG  
FSRWDAAR

>Locus\_4149\_Transcript\_3/4\_Confidence\_0.600\_Length\_1932|. |sp|Q9VAF0|  
Y816\_DROME Uncharacterized protein CG7816 OS=Drosophila melanogaster  
GN=CG7816 PE=2 SV=1|e=1.57328E-84|from=290|to=1399|frame=-3|

Fragment\_6

GSRATSAMEARTCWIMPFTAGGFLHISLVTVLPDLLQERDPKESIKQFGALIGGIVLMAS  
LTTLLE

>Locus\_4149\_Transcript\_1/4\_Confidence\_0.600\_Length\_1883|. |sp|Q9VAF0|

Y816\_DROME Uncharacterized protein CG7816 OS=Drosophila melanogaster  
GN=CG7816 PE=2 SV=1|e=4.90712E-83|from=290|to=1429|frame=-2|

Fragment\_1

NSSIWESDSAFRFIYTDLVMEYIPEYFKDWQYHPWIF

>Locus\_4149\_Transcript\_1/4\_Confidence\_0.600\_Length\_1883|. |sp|Q9VAF0|

Y816\_DROME Uncharacterized protein CG7816 OS=Drosophila melanogaster  
GN=CG7816 PE=2 SV=1|e=4.90712E-83|from=290|to=1429|frame=-2|

Fragment\_2

L

>Locus\_4149\_Transcript\_1/4\_Confidence\_0.600\_Length\_1883|. |sp|Q9VAF0|

Y816\_DROME Uncharacterized protein CG7816 OS=Drosophila melanogaster  
GN=CG7816 PE=2 SV=1|e=4.90712E-83|from=290|to=1429|frame=-2|

Fragment\_3

K

>Locus\_4149\_Transcript\_1/4\_Confidence\_0.600\_Length\_1883|. |sp|Q9VAF0|

Y816\_DROME Uncharacterized protein CG7816 OS=Drosophila melanogaster  
GN=CG7816 PE=2 SV=1|e=4.90712E-83|from=290|to=1429|frame=-2|

Fragment\_4

LLRVLLSFAVGGLLGDVFLHLLPEAWENYSNKGERLVVMYEFVDSGGGSPSMTCGCWVLA

GLLLFTMVEKLFAGYMEDDDVSEEKTERKRKKMSKINCLIKNNNVLRARNENGRFSTSKC

SGGQNGKMCIDIEVINGAIKNGCCMVEELEKEAVSNKS

>Locus\_4149\_Transcript\_1/4\_Confidence\_0.600\_Length\_1883|. |sp|Q9VAF0|

Y816\_DROME Uncharacterized protein CG7816 OS=Drosophila melanogaster  
GN=CG7816 PE=2 SV=1|e=4.90712E-83|from=290|to=1429|frame=-2|

Fragment\_5

KHVSGLNLMANSIDNFTHGLAVGGSFIVSFKLGILTTFAILVHEIPHEVGDFAILLRSG

FSRWDAAR

>Locus\_4149\_Transcript\_1/4\_Confidence\_0.600\_Length\_1883|. |sp|Q9VAF0|

Y816\_DROME Uncharacterized protein CG7816 OS=Drosophila melanogaster  
GN=CG7816 PE=2 SV=1|e=4.90712E-83|from=290|to=1429|frame=-2|

Fragment\_6

GSRATSAMEARTCWIMPFTAGGFLHISLVTVLPDLLQERDPKESIKQFGALIGGIVLMAS

LTTLLE

>Locus\_21525\_Transcript\_1/1\_Confidence\_1.000\_Length\_388|UNIGENE

REPRESENTATIVE TRANSCRIPT|sp|Q9VAP3|CTLH2\_DROME CTL-like protein 2

OS=Drosophila melanogaster GN=CG11880 PE=3 SV=1|e=4.52959E-20|

from=4|to=189|frame=1|Fragment\_1

PVILVVIGTFFITCVFFGVYDMAVDLLLLCFLEDSEKNDGSPERPYMSKELMKILGRN

KV

>Locus\_22736\_Transcript\_1/1\_Confidence\_1.000\_Length\_662|UNIGENE

REPRESENTATIVE TRANSCRIPT|sp|Q9VB11|UNC80\_DROME Protein unc-80

homolog OS=Drosophila melanogaster GN=CG18437 PE=3 SV=4|

e=2.69553E-61|from=2|to=523|frame=2|Fragment\_1

GRG

>Locus\_22736\_Transcript\_1/1\_Confidence\_1.000\_Length\_662|UNIGENE

REPRESENTATIVE TRANSCRIPT|sp|Q9VB11|UNC80\_DROME Protein unc-80

homolog OS=Drosophila melanogaster GN=CG18437 PE=3 SV=4|

e=2.69553E-61|from=2|to=523|frame=2|Fragment\_2

DVAELHQNDISFLVTVVLNAMSP

>Locus\_22736\_Transcript\_1/1\_Confidence\_1.000\_Length\_662|UNIGENE

REPRESENTATIVE TRANSCRIPT|sp|Q9VB11|UNC80\_DROME Protein unc-80

homolog OS=Drosophila melanogaster GN=CG18437 PE=3 SV=4|

e=2.69553E-61|from=2|to=523|frame=2|Fragment\_3

SLTFTGSRETKRPARVRSTLYQAAFLALRVLCVCFEQLSRDWSRIARVMRDLGRNEAA

PELWSFLEFVVTHRTPLYIVLQPFLHKKISQPPIGDHERHMQLIRERMRGTPPSASPR  
RG  
>Locus\_1706\_Transcript\_5/6\_Confidence\_0.583\_Length\_2041|UNIGENE  
REPRESENTATIVE TRANSCRIPT|sp|Q9VC27|NICA\_DROME Nicastrin  
OS=Drosophila melanogaster GN=nct PE=1 SV=3|e=4.9653E-129|from=6|  
to=1931|frame=-3|Fragment\_1  
INNIYVFIIILVISFIYFCHGERTRDKMYVPITGASCIRRLNATHQTGCTSARQGSVGALH  
AIHSESDFEFVLNSGTSPPYAVLMPPIFFNDHNMMQLKESA  
>Locus\_1706\_Transcript\_5/6\_Confidence\_0.583\_Length\_2041|UNIGENE  
REPRESENTATIVE TRANSCRIPT|sp|Q9VC27|NICA\_DROME Nicastrin  
OS=Drosophila melanogaster GN=nct PE=1 SV=3|e=4.9653E-129|from=6|  
to=1931|frame=-3|Fragment\_2  
RVTAVIVTNNTESLNAFSTESKCPNQFIGKHD  
>Locus\_1706\_Transcript\_5/6\_Confidence\_0.583\_Length\_2041|UNIGENE  
REPRESENTATIVE TRANSCRIPT|sp|Q9VC27|NICA\_DROME Nicastrin  
OS=Drosophila melanogaster GN=nct PE=1 SV=3|e=4.9653E-129|from=6|  
to=1931|frame=-3|Fragment\_3  
EYCDASDPLKSWNQYGSNLMHQDFPFILFISDEEQINLLYKCFEKFNNFDIEKQFQRSL  
CSVELSSFMAAAANSKVCHRRSELSKNLSPVKFCDPLGDKNIFATLFPYPYV  
>Locus\_1706\_Transcript\_5/6\_Confidence\_0.583\_Length\_2041|UNIGENE  
REPRESENTATIVE TRANSCRIPT|sp|Q9VC27|NICA\_DROME Nicastrin  
OS=Drosophila melanogaster GN=nct PE=1 SV=3|e=4.9653E-129|from=6|  
to=1931|frame=-3|Fragment\_4  
NTVFEYKTELNGMKHYTDDNSVVDKFTKIKIQLTKTEEREKLILLMARIDTTSMFDGI  
APGAMDSLLSFVTLSTANMLNYLLVRNNIKKSYD  
>Locus\_1706\_Transcript\_5/6\_Confidence\_0.583\_Length\_2041|UNIGENE  
REPRESENTATIVE TRANSCRIPT|sp|Q9VC27|NICA\_DROME Nicastrin  
OS=Drosophila melanogaster GN=nct PE=1 SV=3|e=4.9653E-129|from=6|  
to=1931|frame=-3|Fragment\_5  
KNIFYLLNGESYDYIGSQRLLYDIEKGSFPPKQDN  
>Locus\_1706\_Transcript\_5/6\_Confidence\_0.583\_Length\_2041|UNIGENE  
REPRESENTATIVE TRANSCRIPT|sp|Q9VC27|NICA\_DROME Nicastrin  
OS=Drosophila melanogaster GN=nct PE=1 SV=3|e=4.9653E-129|from=6|  
to=1931|frame=-3|Fragment\_6  
IVFEDFDMIIEIGSLGGKPNYLSSHYAQNNPKIDNFLQNMKTYSEKNKFG  
>Locus\_1706\_Transcript\_5/6\_Confidence\_0.583\_Length\_2041|UNIGENE  
REPRESENTATIVE TRANSCRIPT|sp|Q9VC27|NICA\_DROME Nicastrin  
OS=Drosophila melanogaster GN=nct PE=1 SV=3|e=4.9653E-129|from=6|  
to=1931|frame=-3|Fragment\_7  
ITFHSSQRLPPSSIRTFYSNDNIKAPAMVLTDFDDKFNPNYYHSVYDSASNIKYQYINAS  
EAADDLSKLMNLSNFGDFNPDSVQILVRNISTTLGMALYQEITNMSLTGELGTNPYLIDE  
LLHCYLESADCFRAVSPPNKNNVSPTPPYRYVGVAGYINDATIWTARVLAFLTGSSSN  
RTEED  
>Locus\_1706\_Transcript\_5/6\_Confidence\_0.583\_Length\_2041|UNIGENE  
REPRESENTATIVE TRANSCRIPT|sp|Q9VC27|NICA\_DROME Nicastrin  
OS=Drosophila melanogaster GN=nct PE=1 SV=3|e=4.9653E-129|from=6|  
to=1931|frame=-3|Fragment\_8  
CDFLPYSWVAGFNGLG  
>Locus\_1706\_Transcript\_1/6\_Confidence\_0.583\_Length\_2033|. |sp|Q9VC27|  
NICA\_DROME Nicastrin OS=Drosophila melanogaster GN=nct PE=1 SV=3|  
e=6.4617E-129|from=1|to=1923|frame=-3|Fragment\_1  
INNIYVFIIILVISFIYFCHGERTRDKMYVPITGASCIRRLNATHQTGCTSARQGSVGALH  
AIHSESDFEFVLNSGTSPPYAVLMPPIFFNDHNMMQLKESA  
>Locus\_1706\_Transcript\_1/6\_Confidence\_0.583\_Length\_2033|. |sp|Q9VC27|

NICA\_DROME Nicastrin OS=Drosophila melanogaster GN=nct PE=1 SV=3|  
e=6.4617E-129|from=1|to=1923|frame=-3|Fragment\_2  
RVTAVIVTNNTESLNAFSTESKCPNQFIGKHD  
>Locus\_1706\_Transcript\_1/6\_Confidence\_0.583\_Length\_2033|. |sp|Q9VC27|  
NICA\_DROME Nicastrin OS=Drosophila melanogaster GN=nct PE=1 SV=3|  
e=6.4617E-129|from=1|to=1923|frame=-3|Fragment\_3  
EYCDASDPLKSWNQYGSNLMHQDFPFILFISDEEQINLLYKCFEKFNNFDIEKQFQRSL  
CSVELSSFMAAAANSKVCHRRSELSKNLSPVKFCDPLGDKNIFATLFPYPYV  
>Locus\_1706\_Transcript\_1/6\_Confidence\_0.583\_Length\_2033|. |sp|Q9VC27|  
NICA\_DROME Nicastrin OS=Drosophila melanogaster GN=nct PE=1 SV=3|  
e=6.4617E-129|from=1|to=1923|frame=-3|Fragment\_4  
NTVFEYKTELNGMKHYTDDNSVVDKFTTEKKIQKSLTKTEEREKLILLMARIDTTSMFDGI  
APGAMDSLLSFVTLSTANMLNYLLVRNNIKKSYD  
>Locus\_1706\_Transcript\_1/6\_Confidence\_0.583\_Length\_2033|. |sp|Q9VC27|  
NICA\_DROME Nicastrin OS=Drosophila melanogaster GN=nct PE=1 SV=3|  
e=6.4617E-129|from=1|to=1923|frame=-3|Fragment\_5  
KNIFYLLNGESYDIYSQRLLYDIEKGSFPPKQDN  
>Locus\_1706\_Transcript\_1/6\_Confidence\_0.583\_Length\_2033|. |sp|Q9VC27|  
NICA\_DROME Nicastrin OS=Drosophila melanogaster GN=nct PE=1 SV=3|  
e=6.4617E-129|from=1|to=1923|frame=-3|Fragment\_6  
IVFEDFDMIIEIGSLGGKPNYLSSHYAQNNPKIDNFLQNMKTYSEKNKFG  
>Locus\_1706\_Transcript\_1/6\_Confidence\_0.583\_Length\_2033|. |sp|Q9VC27|  
NICA\_DROME Nicastrin OS=Drosophila melanogaster GN=nct PE=1 SV=3|  
e=6.4617E-129|from=1|to=1923|frame=-3|Fragment\_7  
ITFHSSQRLPPSSIRTFYSNDNIKAPAMVLTDFDDKFNVPYHVSVDASASNIKYQYINAS  
EAADDLSKLMNLNNFVDFNPDSVQILVRNISTTLGMALYQEITNMSLTGELGTNPYLIDE  
LLHCYLESADCIAFRAVSPPNKNNVSPTPPYRYVGVAGYINDATIWTARVLAFLTGSSSN  
RTEED  
>Locus\_1706\_Transcript\_1/6\_Confidence\_0.583\_Length\_2033|. |sp|Q9VC27|  
NICA\_DROME Nicastrin OS=Drosophila melanogaster GN=nct PE=1 SV=3|  
e=6.4617E-129|from=1|to=1923|frame=-3|Fragment\_8  
CDFLPYSWVAGFNGL  
>Locus\_1706\_Transcript\_6/6\_Confidence\_0.583\_Length\_2033|. |sp|Q9VC27|  
NICA\_DROME Nicastrin OS=Drosophila melanogaster GN=nct PE=1 SV=3|  
e=2.4555E-128|from=1|to=1923|frame=-3|Fragment\_1  
INNIYVFIIILVISFIYFCHGERTRDKMYVPITGASCIRRLNATHQTGCTSARQGSVGLH  
AIHSESDFEFVLNSGTSPPYAVLMPPIFFNDHNMQLKESA  
>Locus\_1706\_Transcript\_6/6\_Confidence\_0.583\_Length\_2033|. |sp|Q9VC27|  
NICA\_DROME Nicastrin OS=Drosophila melanogaster GN=nct PE=1 SV=3|  
e=2.4555E-128|from=1|to=1923|frame=-3|Fragment\_2  
RVTAVIVTNNTESLNAFSTESKCPNQFIGKHD  
>Locus\_1706\_Transcript\_6/6\_Confidence\_0.583\_Length\_2033|. |sp|Q9VC27|  
NICA\_DROME Nicastrin OS=Drosophila melanogaster GN=nct PE=1 SV=3|  
e=2.4555E-128|from=1|to=1923|frame=-3|Fragment\_3  
EYCDASDPLKSWNQYGSNLMHQDFPFILFISDEEQINLLYKCFEKFNNFDIEKQFQRSL  
CSVELSSFMAAAANSKVCHRRSELSKNLSPVKFCDPLGDKNIFATLFPYPYV  
>Locus\_1706\_Transcript\_6/6\_Confidence\_0.583\_Length\_2033|. |sp|Q9VC27|  
NICA\_DROME Nicastrin OS=Drosophila melanogaster GN=nct PE=1 SV=3|  
e=2.4555E-128|from=1|to=1923|frame=-3|Fragment\_4  
NTVFEYKTELNGMKHYTDDNSVVDKFTTEKKIQKSLTKTEEREKLILLMARIDTTSMFDGI  
APGAMDSLLSFVTLSTANMLNYLLVRNNIKKSYD  
>Locus\_1706\_Transcript\_6/6\_Confidence\_0.583\_Length\_2033|. |sp|Q9VC27|  
NICA\_DROME Nicastrin OS=Drosophila melanogaster GN=nct PE=1 SV=3|  
e=2.4555E-128|from=1|to=1923|frame=-3|Fragment\_5

KNIFYLLNGESYDYIGSQRLLYDIEKGSFPPKQDN  
>Locus\_1706\_Transcript\_6/6\_Confidence\_0.583\_Length\_2033|. |sp|Q9VC27|  
NICA\_DROME Nicastrin OS=Drosophila melanogaster GN=nct PE=1 SV=3|  
e=2.4555E-128|from=1|to=1923|frame=-3|Fragment\_6  
IVFEDFDMIEIGSLGGKPNYLSSHYAQNNPKIDNFLQNMKTYSEKNKFG  
>Locus\_1706\_Transcript\_6/6\_Confidence\_0.583\_Length\_2033|. |sp|Q9VC27|  
NICA\_DROME Nicastrin OS=Drosophila melanogaster GN=nct PE=1 SV=3|  
e=2.4555E-128|from=1|to=1923|frame=-3|Fragment\_7  
ITFHSSQRLPPSSIRTFYSNDNIKAPAMVLTDFDDKFNVPYYHSVYDSASNIKYQYINAS  
EAADDLSKLMNLSNFGDFNPDSVQILVRNISTTLGMALYQEITNMSLTGELGTNPYLIDE  
LLHCYLESADCFRAVSPPNKNNVSPTPPYRYVGVAGYINDATIWTARVLAFLTGSSSN  
RTEED  
>Locus\_1706\_Transcript\_6/6\_Confidence\_0.583\_Length\_2033|. |sp|Q9VC27|  
NICA\_DROME Nicastrin OS=Drosophila melanogaster GN=nct PE=1 SV=3|  
e=2.4555E-128|from=1|to=1923|frame=-3|Fragment\_8  
CDFLPYSWVAGFNGL  
>Locus\_1706\_Transcript\_4/6\_Confidence\_0.583\_Length\_1794|. |sp|Q9VC27|  
NICA\_DROME Nicastrin OS=Drosophila melanogaster GN=nct PE=1 SV=3|  
e=7.0742E-116|from=1|to=1794|frame=-1|Fragment\_1  
HQTGCTSARQGSVGLHAIHSESDFEFVLNSGTSPPYAVLMPPIFFNDHMMQLKESA  
>Locus\_1706\_Transcript\_4/6\_Confidence\_0.583\_Length\_1794|. |sp|Q9VC27|  
NICA\_DROME Nicastrin OS=Drosophila melanogaster GN=nct PE=1 SV=3|  
e=7.0742E-116|from=1|to=1794|frame=-1|Fragment\_2  
RVTAVIVTNNTESLNAFSTESKCPNQFIGKHD  
>Locus\_1706\_Transcript\_4/6\_Confidence\_0.583\_Length\_1794|. |sp|Q9VC27|  
NICA\_DROME Nicastrin OS=Drosophila melanogaster GN=nct PE=1 SV=3|  
e=7.0742E-116|from=1|to=1794|frame=-1|Fragment\_3  
EYCDASDPLKSWNQYGSNLMHQDFPFPIILFISDEEQINLLYKCFEKFNNFDIEKQFQRSL  
CSVELSSFMAAANSKVCHRRELSKNSLPVKFCDPDGLGDKNIFATLFPYPYV  
>Locus\_1706\_Transcript\_4/6\_Confidence\_0.583\_Length\_1794|. |sp|Q9VC27|  
NICA\_DROME Nicastrin OS=Drosophila melanogaster GN=nct PE=1 SV=3|  
e=7.0742E-116|from=1|to=1794|frame=-1|Fragment\_4  
NTVFEYKTELNGMKHYTDDNSVVDKFTTEKKIQKSLTKTEEREKLILLMARIDTTSMTDGI  
APGAMDSLLSFVTLLSTANMLNYLLVRNNIKSYD  
>Locus\_1706\_Transcript\_4/6\_Confidence\_0.583\_Length\_1794|. |sp|Q9VC27|  
NICA\_DROME Nicastrin OS=Drosophila melanogaster GN=nct PE=1 SV=3|  
e=7.0742E-116|from=1|to=1794|frame=-1|Fragment\_5  
KNIFYLLNGESYDYIGSQRLLYDIEKGSFPPKQDN  
>Locus\_1706\_Transcript\_4/6\_Confidence\_0.583\_Length\_1794|. |sp|Q9VC27|  
NICA\_DROME Nicastrin OS=Drosophila melanogaster GN=nct PE=1 SV=3|  
e=7.0742E-116|from=1|to=1794|frame=-1|Fragment\_6  
IVFEDFDMIEIGSLGGKPNYLSSHYAQNNPKIDNFLQNMKTYSEKNKFGITFH  
>Locus\_1706\_Transcript\_4/6\_Confidence\_0.583\_Length\_1794|. |sp|Q9VC27|  
NICA\_DROME Nicastrin OS=Drosophila melanogaster GN=nct PE=1 SV=3|  
e=7.0742E-116|from=1|to=1794|frame=-1|Fragment\_7  
SSQRLPPSSIRTFYSNDNIKAPAMVLTDFDDKFNVPYYHSVYDSASNIKYQYINASEAAD  
DLSKLMNLSNFGDFNPDSVQILVRNISTTLGMALYQEITNMSLTGELGTNPYLIDELLHC  
YLESADCFRAVSPPNKNNVSPTPPYRYVGVAGYINDATIWTARVLAFLTGSSSNRTEE  
D  
>Locus\_1706\_Transcript\_4/6\_Confidence\_0.583\_Length\_1794|. |sp|Q9VC27|  
NICA\_DROME Nicastrin OS=Drosophila melanogaster GN=nct PE=1 SV=3|  
e=7.0742E-116|from=1|to=1794|frame=-1|Fragment\_8  
CDFLPYSWVAGFNGL  
>Locus\_1706\_Transcript\_2/6\_Confidence\_0.500\_Length\_1353|. |sp|Q9VC27|

NICA\_DROME Nicastrin OS=Drosophila melanogaster GN=nct PE=1 SV=3|  
e=2.20251E-71|from=1|to=1353|frame=-1|Fragment\_1  
RSLCSVELSSFMAAAANSEVCHRRSELSKNLSPVKFCDPLGDKNIFATLFP RPYPVNASDN  
NIDDSLNASNNTVF EYKTELNGMKHYTDDNSVVDKFTEKKIQKSLTKTEEREKLILLMAR  
IDTTSMFDGIAPGAMDSLLSFVTLLSTANMLNYLLVRNNIKKSYD  
>Locus\_1706\_Transcript\_2/6\_Confidence\_0.500\_Length\_1353|. |sp|Q9VC27|  
NICA\_DROME Nicastrin OS=Drosophila melanogaster GN=nct PE=1 SV=3|  
e=2.20251E-71|from=1|to=1353|frame=-1|Fragment\_2  
KNIFYLLNGESYDYIGSQRLLYDIEKGSFPPKQDN  
>Locus\_1706\_Transcript\_2/6\_Confidence\_0.500\_Length\_1353|. |sp|Q9VC27|  
NICA\_DROME Nicastrin OS=Drosophila melanogaster GN=nct PE=1 SV=3|  
e=2.20251E-71|from=1|to=1353|frame=-1|Fragment\_3  
IVFEDFDMIIEIGSLGGKPNYLSSHYAQNNPKIDNFLQNMKTYSEKNKFGITFH  
>Locus\_1706\_Transcript\_2/6\_Confidence\_0.500\_Length\_1353|. |sp|Q9VC27|  
NICA\_DROME Nicastrin OS=Drosophila melanogaster GN=nct PE=1 SV=3|  
e=2.20251E-71|from=1|to=1353|frame=-1|Fragment\_4  
SSQRLPPSSIRTFYSNDNIKAPAMVLTDFDDKFVNPYYHSVYDSASNIKYQYINASEAAD  
DLSKLMNLSNFGDFNPDSVQILVRNISTTLGMALYQEITNMSLTGELGTNPYLIDELLHC  
YLESADCIAFRAVSPPNKNNVSPTPPYRYVGVAGYINDATIWTARVLAFLTGSSSNRTEE  
D  
>Locus\_1706\_Transcript\_2/6\_Confidence\_0.500\_Length\_1353|. |sp|Q9VC27|  
NICA\_DROME Nicastrin OS=Drosophila melanogaster GN=nct PE=1 SV=3|  
e=2.20251E-71|from=1|to=1353|frame=-1|Fragment\_5  
CDFLPYSWVAGFNGL  
>Locus\_1706\_Transcript\_3/6\_Confidence\_0.417\_Length\_873|. |sp|Q9VC27|  
NICA\_DROME Nicastrin OS=Drosophila melanogaster GN=nct PE=1 SV=3|  
e=4.58821E-47|from=1|to=855|frame=-1|Fragment\_1  
NIFYLLNGESYDYIGSQRLLYDIEKGSFPPKQEN  
>Locus\_1706\_Transcript\_3/6\_Confidence\_0.417\_Length\_873|. |sp|Q9VC27|  
NICA\_DROME Nicastrin OS=Drosophila melanogaster GN=nct PE=1 SV=3|  
e=4.58821E-47|from=1|to=855|frame=-1|Fragment\_2  
IVFEDFDMIIEIGSLGGKPNFLSSHYAQNNPKIDNFLQNMKTYSEKNKFGITFH  
>Locus\_1706\_Transcript\_3/6\_Confidence\_0.417\_Length\_873|. |sp|Q9VC27|  
NICA\_DROME Nicastrin OS=Drosophila melanogaster GN=nct PE=1 SV=3|  
e=4.58821E-47|from=1|to=855|frame=-1|Fragment\_3  
SSQRLPPSSIRTFYSNDNIKAPAMVLTDFDDKFVNPYYHSVYDSASNIKYQYINASEAAD  
DLSKLMNLSNFGDFNPDSVQILVRNISTTLGMALYQEITNMSLTGELGTNPYLIDELLHC  
YLESADCIAFRAVSPPNKNNVSPTPPYRYVGVAGYINDATIWTARVLAFLTGSSSNRTEE  
D  
>Locus\_1706\_Transcript\_3/6\_Confidence\_0.417\_Length\_873|. |sp|Q9VC27|  
NICA\_DROME Nicastrin OS=Drosophila melanogaster GN=nct PE=1 SV=3|  
e=4.58821E-47|from=1|to=855|frame=-1|Fragment\_4  
CDFLPYSWVAGFNGL

>Locus\_5652\_Transcript\_1/9\_Confidence\_0.481\_Length\_2048|UNIGENE  
REPRESENTATIVE TRANSCRIPT|sp|Q9VC57|ATLAS\_DROME Atlastin  
OS=Drosophila melanogaster GN=atl PE=1 SV=1|e=0|from=123|to=1721|  
frame=-1|Fragment\_1  
GHPVQIVRTLSDHTFELDEAALSEILNRPELKDRAAVVVSVAGAFRKGKSFLLDFFFLRYM  
NSKYVNRESSGDWLGAEADPLSGFSWRGGSERDTTGILMWSEPF L HESANGQKLAVLLLD  
TQGTDFDSESTVKDCATVFALSTMLSSVQIYNLTQNIQEDDLQHLHLFTEYGR LALADSGQ  
KPFQRLQFLVRDWSFPYEEQYGAVGGQNLQRRMKISERQHPELQSLRKHIASCFT EVAC  
FLMHPGLTVATNPNFDGRLTDITPEFKDSLKVFIPMLLAPENLIAKRINGVPVKCRDLV  
QYFKAYMSIYKGNELPEPKSMLVATAEANNLSAVAEAKDMYTQLMEDICGGSKPYLSTAH

LESEHLRIRDKAVGTFIQKRKMGGSAFSENYRIKLEADLDEAFEQFKGHNSKNIFKAAR  
TPAVFFALLILMYVLSGVFGLVGLYAISNICNFAMGVALLTLVLWAYIRYSGELTDIGVT  
IDEIANMIWINAMKPIYESCMEKSIQHV  
>Locus\_5652\_Transcript\_1/9\_Confidence\_0.481\_Length\_2048|UNIGENE  
REPRESENTATIVE TRANSCRIPT|sp|Q9VC57|ATLAS\_DROME Atlastin  
OS=Drosophila melanogaster GN=atl PE=1 SV=1|e=0|from=123|to=1721|  
frame=-1|Fragment\_2  
TNQAFTAGATTALNSTH  
>Locus\_5652\_Transcript\_1/9\_Confidence\_0.481\_Length\_2048|UNIGENE  
REPRESENTATIVE TRANSCRIPT|sp|Q9VC57|ATLAS\_DROME Atlastin  
OS=Drosophila melanogaster GN=atl PE=1 SV=1|e=0|from=123|to=1721|  
frame=-1|Fragment\_3  
ANGKVKQS  
>Locus\_5652\_Transcript\_2/9\_Confidence\_0.556\_Length\_2048|. |sp|Q9VC57|  
ATLAS\_DROME Atlastin OS=Drosophila melanogaster GN=atl PE=1 SV=1|  
e=0|from=123|to=1721|frame=-1|Fragment\_1  
GHPVQIVRTLSDHTFELDEAALSEILNRPELKDRAAVVSVAGAFRKGKSFLLDFFFLRYM  
NSKYVNRETAGDWLGAEDAPLSGFSWRGGSERDTTGILMWSEPFLHESANGQKLAVLLLD  
TQGTFDSESTVKDCATVFALSTMLSSVQIYNLTQNIQEDDLQHLHLFTEYGRLLALADSGQ  
KPFQRLQFLVRDWSFPYEEQYGAVGGQNLQRRMKISERQHPELQSLRKHIASCFTVAC  
FLMPHPGLTVATNPNFDGRLTDITPEFKDSLKVFIPMLLAPENLIAKRINGVPVKCRDLV  
QYFKAYMSIYKGNELPEPKSMLVATAEANNLSAVAEAKDMYTQLMEDICGGSKPYLSTAH  
LESEHLRIRDKAVGTFIQKRKMGGSAFSENYRIKLEADLDEAFEQFKGHNSKNIFKAAR  
TPAVFFALLILMYVLSGVFGLVGLYAISNICNFAMGVALLTLVLWAYIRYSGELTDIGVT  
IDEIANMIWINAMKPIYESCMEKSIQHV  
>Locus\_5652\_Transcript\_2/9\_Confidence\_0.556\_Length\_2048|. |sp|Q9VC57|  
ATLAS\_DROME Atlastin OS=Drosophila melanogaster GN=atl PE=1 SV=1|  
e=0|from=123|to=1721|frame=-1|Fragment\_2  
TNQAFTAGATTALNSTH  
>Locus\_5652\_Transcript\_2/9\_Confidence\_0.556\_Length\_2048|. |sp|Q9VC57|  
ATLAS\_DROME Atlastin OS=Drosophila melanogaster GN=atl PE=1 SV=1|  
e=0|from=123|to=1721|frame=-1|Fragment\_3  
ANGKVKQS  
>Locus\_5652\_Transcript\_3/9\_Confidence\_0.593\_Length\_2048|. |sp|Q9VC57|  
ATLAS\_DROME Atlastin OS=Drosophila melanogaster GN=atl PE=1 SV=1|  
e=0|from=123|to=1721|frame=-1|Fragment\_1  
GHPVQIVRTLSDHTFELDEAALSEILNRPELKDRAAVVSVAGAFRKGKSFLLDFFFLRYM  
NSKYVNRETAGDWLGAEDAPLSGFSWRGGSERDTTGILMWSEPFLHESANGQKLAVLLLD  
TQGTFDSESTVKDCATVFALSTMLSSVQIYNLTQNIQEDDLQHLHLFTEYGRLLALADSGQ  
KPFQRLQFLVRDWSFPYEEQYGAVGGQNLQRRMKISERQHPELQSLRKHIASCFTVAC  
FLMPHPGLTVATNPNFDGRLTDITPEFKDSLKVFIPMLLAPENLIAKRINGVPVKCRDLV  
QYFKAYMSIYKGNELPEPKSMLVATAEANNLSAVAEAKDMYTQLMEDICGGSKPYLSTAH  
LESEHLRIRDKAVGTFIQKRKMGGSAFSENYRIKLEADLDEAFEQFKGHNSKNIFKAAR  
TPAVFFALLILMYVLSGVFGLVGLYAISNICNFAMGVALLTLVLWAYIRYSGELTDIGVT  
IDEIANMIWINAMKPIYESCMEKSIQHV  
>Locus\_5652\_Transcript\_3/9\_Confidence\_0.593\_Length\_2048|. |sp|Q9VC57|  
ATLAS\_DROME Atlastin OS=Drosophila melanogaster GN=atl PE=1 SV=1|  
e=0|from=123|to=1721|frame=-1|Fragment\_2  
TNQAFTAGATTALNSTH  
>Locus\_5652\_Transcript\_3/9\_Confidence\_0.593\_Length\_2048|. |sp|Q9VC57|  
ATLAS\_DROME Atlastin OS=Drosophila melanogaster GN=atl PE=1 SV=1|  
e=0|from=123|to=1721|frame=-1|Fragment\_3  
ANGKVKQS  
>Locus\_5652\_Transcript\_5/9\_Confidence\_0.593\_Length\_2048|. |sp|Q9VC57|

ATLAS\_DROME Atlastin OS=Drosophila melanogaster GN=atl PE=1 SV=1|  
e=0|from=123|to=1721|frame=-1|Fragment\_1  
GHPVQIVRTLSDHTFELDEAALSEILNRPELKDRAAVVSVAGAFRKGKSFLLDFFFLRYM  
NSKYVNRESSGDWLGAEADPLSGFSWRGGSERDTTGILMWSEPFLHESANGQKLAVLLLD  
TQGTFDSESTVKDCATVFALSTMLSSVQIYNLTQNIQEDDLQHLHLFTEYGRALADSGQ  
KPFQRLQFLVRDWSFPYEEQYGAVGGQNLQRRMKISERQHPELQSLRKHIASCFTVAC  
FLMPPHGLTVATNPNFDGRLTDITPEFKDSLKVFIPMLLAPENLIAKRINGVPVKCRDLV  
QYFKAYMSIYKGNELPEPKSMLVATAEANNLSAVAEAKDMYTQLMEDICGGSKPYLSTAH  
LESEHLRIRDKAVGTFTIQKRKMGGSAFSENYRIKLEADLDEAFEQFKGHNSKNIFKAAR  
TPAVFFALLILMYVLSGVFGLVGLYAISNICNFAMGVALLTLVLWAYIRYSGELTDIGVT  
IDEIANMIWINAMKPIYESCMEKSIQHV  
>Locus\_5652\_Transcript\_5/9\_Confidence\_0.593\_Length\_2048|. |sp|Q9VC57|  
ATLAS\_DROME Atlastin OS=Drosophila melanogaster GN=atl PE=1 SV=1|  
e=0|from=123|to=1721|frame=-1|Fragment\_2  
TNQAFTAGATTALNSTH  
>Locus\_5652\_Transcript\_5/9\_Confidence\_0.593\_Length\_2048|. |sp|Q9VC57|  
ATLAS\_DROME Atlastin OS=Drosophila melanogaster GN=atl PE=1 SV=1|  
e=0|from=123|to=1721|frame=-1|Fragment\_3  
ANGKVKQS  
>Locus\_5652\_Transcript\_7/9\_Confidence\_0.556\_Length\_2048|. |sp|Q9VC57|  
ATLAS\_DROME Atlastin OS=Drosophila melanogaster GN=atl PE=1 SV=1|  
e=0|from=123|to=1721|frame=-1|Fragment\_1  
GHPVQIVRTLSDHTFELDEAALSEILNRPELKDRAAVVSVAGAFRKGKSFLLDFFFLRYM  
NSKYVNRESSGDWLGAEADPLSGFSWRGGSERDTTGILMWSEPFLHESANGQKLAVLLLD  
TQGTFDSESTVKDCATVFALSTMLSSVQIYNLTQNIQEDDLQHLHLFTEYGRALADSGQ  
KPFQRLQFLVRDWSFPYEEQYGAVGGQNLQRRMKISERQHPELQSLRKHIASCFTVAC  
FLMPPHGLTVATNPNFDGRLTDITPEFKDSLKVFIPMLLAPENLIAKRINGVPVKCRDLV  
QYFKAYMSIYKGNELPEPKSMLVATAEANNLSAVAEAKDMYTQLMEDICGGSKPYLSTAH  
LESEHLRIRDKAVGTFTIQKRKMGGSAFSENYRIKLEADLDEAFEQFKGHNSKNIFKAAR  
TPAVFFALLILMYVLSGVFGLVGLYAISNICNFAMGVALLTLVLWAYIRYSGELTDIGVT  
IDEIANMIWINAMKPIYESCMEKSIQHV  
>Locus\_5652\_Transcript\_7/9\_Confidence\_0.556\_Length\_2048|. |sp|Q9VC57|  
ATLAS\_DROME Atlastin OS=Drosophila melanogaster GN=atl PE=1 SV=1|  
e=0|from=123|to=1721|frame=-1|Fragment\_2  
TNQAFTAGATTALNSTH  
>Locus\_5652\_Transcript\_7/9\_Confidence\_0.556\_Length\_2048|. |sp|Q9VC57|  
ATLAS\_DROME Atlastin OS=Drosophila melanogaster GN=atl PE=1 SV=1|  
e=0|from=123|to=1721|frame=-1|Fragment\_3  
ANGKVKQS  
>Locus\_5652\_Transcript\_8/9\_Confidence\_0.556\_Length\_2048|. |sp|Q9VC57|  
ATLAS\_DROME Atlastin OS=Drosophila melanogaster GN=atl PE=1 SV=1|  
e=0|from=123|to=1721|frame=-1|Fragment\_1  
GHPVQIVRTLSDHTFELDEAALSEILNRPELKDRAAVVSVAGAFRKGKSFLLDFFFLRYM  
NSKYVNRESSGDWLGAEADPLSGFSWRGGSERDTTGILMWSEPFLHESANGQKLAVLLLD  
TQGTFDSESTVKDCATVFALSTMLSSVQIYNLTQNIQEDDLQHLHLFTEYGRALADSGQ  
KPFQRLQFLVRDWSFPYEEQYGAVGGQNLQRRMKISERQHPELQSLRKHIASCFTVAC  
FLMPPHGLTVATNPNFDGRLTDITPEFKDSLKVFIPMLLAPENLIAKRINGVPVKCRDLV  
QYFKAYMSIYKGNELPEPKSMLVATAEANNLSAVAEAKDMYTQLMEDICGGSKPYLSTAH  
LESEHLRIRDKAVGTFTIQKRKMGGSAFSENYRIKLEADLDEAFEQFKGHNSKNIFKAAR  
TPAVFFALLILMYVLSGVFGLVGLYAISNICNFAMGVALLTLVLWAYIRYSGELTDIGVT  
IDEIANMIWINAMKPIYESCMEKSIQHV  
>Locus\_5652\_Transcript\_8/9\_Confidence\_0.556\_Length\_2048|. |sp|Q9VC57|  
ATLAS\_DROME Atlastin OS=Drosophila melanogaster GN=atl PE=1 SV=1|  
e=0|from=123|to=1721|frame=-1|Fragment\_2

TNQAFTAGATTALNSTH

>Locus\_5652\_Transcript\_8/9\_Confidence\_0.556\_Length\_2048|. |sp|Q9VC57|  
ATLAS\_DROME Atlastin OS=Drosophila melanogaster GN=atl PE=1 SV=1|  
e=0|from=123|to=1721|frame=-1|Fragment\_3

ANGKVKQS

>Locus\_5652\_Transcript\_9/9\_Confidence\_0.556\_Length\_2048|. |sp|Q9VC57|  
ATLAS\_DROME Atlastin OS=Drosophila melanogaster GN=atl PE=1 SV=1|  
e=0|from=123|to=1721|frame=-1|Fragment\_1

GHPVQIVRTLSDHTFELDEAALSEILNRPELKDRAAVVSVAGAFRKGKSFLLDFFFLRYM  
NSKYVNRESSGDWLGAEADAPLSGFSWRGGSERDTTGILMWSEPFHESANGQKLAVLLLD  
TQGTFDSESTVKDCATVFALSTMLSSVQIYNLTQNIQEDDLQHLHLFTEYGRALADSGQ  
KPFQRLQFLVRDWSFPYEEQYGAVGGQNLQRRMKISERQHPELQSLRKHIASCFTVAC  
FLMPPHGLTVATNPNFDGRLTDITPEFKDSLKVFIPMLLAPENLIAKRINGVPVKCRDLV  
QYFKAYMSIYKGNELPEPKSMLVATAEANNLSAVAEAKDMYTQLMEDICGGSKPYLSTAH  
LESEHLRIRDKAVGTFIQKRKMGGSAFSENYRIKLEADLDEAFEQFKGHNSKNIKFAAR  
TPAVFFALLILMYVLSGVFGLVGLYAISNICNFAMGVALLTLVLWAYIRYSGELTDIGVT  
IDEIANMIWINAMKPIYESCMEKSIQHV

>Locus\_5652\_Transcript\_9/9\_Confidence\_0.556\_Length\_2048|. |sp|Q9VC57|  
ATLAS\_DROME Atlastin OS=Drosophila melanogaster GN=atl PE=1 SV=1|  
e=0|from=123|to=1721|frame=-1|Fragment\_2

TNQAFTAGATTALNSTH

>Locus\_5652\_Transcript\_9/9\_Confidence\_0.556\_Length\_2048|. |sp|Q9VC57|  
ATLAS\_DROME Atlastin OS=Drosophila melanogaster GN=atl PE=1 SV=1|  
e=0|from=123|to=1721|frame=-1|Fragment\_3

ANGKVKQS

>Locus\_5652\_Transcript\_4/9\_Confidence\_0.519\_Length\_1850|. |sp|Q9VC57|  
ATLAS\_DROME Atlastin OS=Drosophila melanogaster GN=atl PE=1 SV=1|  
e=0|from=3|to=1523|frame=-1|Fragment\_1

GHPVQIVRTLSDHTFELDEAALSEILNRPELKDRAAVVSVAGAFRKGKSFLLDFFFLRYM  
NSKYVNRESSGDWLGAEADAPLSGFSWRGGSERDTTGILMWSEPFHESANGQKLAVLLLD  
TQGTFDSESTVKDCATVFALSTMLSSVQIYNLTQNIQEDDLQHLHLFTEYGRALADSGQ  
KPFQRLQFLVRDWSFPYEEQYGAVGGQNLQRRMKISERQHPELQSLRKHIASCFTVAC  
FLMPPHGLTVATNPNFDGRLTDITPEFKDSLKVFIPMLLAPENLIAKRINGVPVKCRDLV  
QYFKAYMSIYKGNELPEPKSMLVATAEANNLSAVAEAKDMYTQLMEDICGGSKPYLSTAH  
LESEHLRIRDKAVGTFIQKRKMGGSAFSENYRIKLEADLDEAFEQFKGHNSKNIKFAAR  
TPAVFFALLILMYVLSGVFGLVGLYAISNICNFAMGVALLTLVLWAYIRYSGELTDIGVT  
IDEIANMIWINAMKPVYESCMEKSIQH

>Locus\_5652\_Transcript\_6/9\_Confidence\_0.556\_Length\_1850|. |sp|Q9VC57|  
ATLAS\_DROME Atlastin OS=Drosophila melanogaster GN=atl PE=1 SV=1|  
e=0|from=3|to=1523|frame=-1|Fragment\_1

GHPVQIVRTLSDHTFELDEAALSEILNRPELKDRAAVVSVAGAFRKGKSFLLDFFFLRYM  
NSKYVNRESSGDWLGAEADAPLSGFSWRGGSERDTTGILMWSEPFHESANGQKLAVLLLD  
TQGTFDSESTVKDCATVFALSTMLSSVQIYNLTQNIQEDDLQHLHLFTEYGRALADSGQ  
KPFQRLQFLVRDWSFPYEEQYGAVGGQNLQRRMKISERQHPELQSLRKHIASCFTVAC  
FLMPPHGLTVATNPNFDGRLTDITPEFKDSLKVFIPMLLAPENLIAKRINGVPVKCRDLV  
QYFKAYMSIYKGNELPEPKSMLVATAEANNLSAVAEAKDMYTQLMEDICGGSKPYLSTAH  
LESEHLRIRDKAVGTFIQKRKMGGSAFSENYRIKLEADLDEAFEQFKGHNSKNIKFAAR  
TPAVFFALLILMYVLSGVFGLVGLYAISNICNFAMGVALLTLVLWAYIRYSGELTDIGVT  
IDEIANMIWINAMKPVYESCMEKSIQH

>Locus\_2946\_Transcript\_5/6\_Confidence\_0.308\_Length\_890|UNIGENE  
REPRESENTATIVE TRANSCRIPT|sp|Q9VDD7|S35B1\_DROME Solute carrier  
family 35 member B1 homolog OS=Drosophila melanogaster GN=CG5802  
PE=1 SV=1|e=7.2237E-72|from=1|to=846|frame=1|Fragment\_1

ETFKFALTLVFIQCVVNYIFAKFILFVTPREDRTPDSLYAGASLTYLGAMVTSTMALQW

VSYPTQVIGKAAKPIPVMLLGVLIGR  
>Locus\_2946\_Transcript\_5/6\_Confidence\_0.308\_Length\_890|UNIGENE  
REPRESENTATIVE TRANSCRIPT|sp|Q9VDD7|S35B1\_DROME Solute carrier  
family 35 member B1 homolog OS=Drosophila melanogaster GN=CG5802  
PE=1 SV=1|e=7.2237E-72|from=1|to=846|frame=1|Fragment\_2  
CVVLIVAGIALFMYKDNESNSSTNKFGEIILLFSLMDGILGALQDLIRDYKPPNV  
LKTSTEEHTPPSGLNMMLAINGWSANYLALILLFISEGKDFIRFSVCYPYILQQLAILAV  
TGAVGQLFIYIIIISKFGPLSCSIVTTTRKFFTVLFSVIFFANPINTRQWVGAAVFTGLF  
LDIIYGK  
>Locus\_2946\_Transcript\_3/6\_Confidence\_0.385\_Length\_838|. |sp|Q9VDD7|  
S35B1\_DROME Solute carrier family 35 member B1 homolog OS=Drosophila  
melanogaster GN=CG5802 PE=1 SV=1|e=1.31772E-64|from=258|to=827|  
frame=3|Fragment\_1  
ENSKFLFYAAGIFVCYFYFGILQEKITRGKYGDEVNEKGEKGEKFKCALALVQVQCVVNY  
VFAKGILYFKPQDEDRTPKVYYASSALTYLLAMVSSNMALQWVPYPTQVVGKAAKPIPVM  
LLGVLIGHKSYPMFRYFCVLLIVIGVVLVFMKDNKSSVNVDSFSGIGELLLVMSLSMDGL  
TGAIQDRMRA  
>Locus\_2946\_Transcript\_1/6\_Confidence\_0.308\_Length\_838|. |sp|Q9VDD7|  
S35B1\_DROME Solute carrier family 35 member B1 homolog OS=Drosophila  
melanogaster GN=CG5802 PE=1 SV=1|e=1.843E-58|from=258|to=827|  
frame=3|Fragment\_1  
ENSKFLFYAAGIFVCYFYFGILQEKITRGKYGDEVNEKGEKGEKFKCALALVQVQCVVNY  
VFAKGILYFKPQDEDRTPKVYYASSALTYLLAMVSSNMALQWVPYPTQVVGKAAKPIPVM  
LLGVLIGHKSYPMFRY  
>Locus\_2946\_Transcript\_1/6\_Confidence\_0.308\_Length\_838|. |sp|Q9VDD7|  
S35B1\_DROME Solute carrier family 35 member B1 homolog OS=Drosophila  
melanogaster GN=CG5802 PE=1 SV=1|e=1.843E-58|from=258|to=827|  
frame=3|Fragment\_2  
FMYKDNKSSVNVDSFSGIGELLLVMSLSMDGLTGAIQDRMRA  
>Locus\_14123\_Transcript\_1/1\_Confidence\_1.000\_Length\_663|. |sp|Q9VDD7|  
S35B1\_DROME Solute carrier family 35 member B1 homolog OS=Drosophila  
melanogaster GN=CG5802 PE=1 SV=1|e=6.08631E-45|from=16|to=483|  
frame=1|Fragment\_1  
IGELLLVMSLSMDGLTGAIQDRMRAHKPSTSTAQSHKPPSAEKMMVATNGWSATYLSVAL  
LLSGEGREFLSFAVRYPIGTQLAALAITGALGQLFIFMMVSKFGPLACSVVTTTRKFFT  
VLFSVIFLANPLIARQWFGAVLVFTGLFLDMIYGKK  
>Locus\_7682\_Transcript\_1/1\_Confidence\_1.000\_Length\_429|. |sp|Q9VDD7|  
S35B1\_DROME Solute carrier family 35 member B1 homolog OS=Drosophila  
melanogaster GN=CG5802 PE=1 SV=1|e=3.40001E-36|from=4|to=414|  
frame=-1|Fragment\_1  
IGELLLVMSLSMDGLTGAIQDRMRAHKPSSSTAQFHKPPSAEKMMVATNGWSATYISVAL  
LLSGEGRDFLSFAVRYPIGTQLAALAVTGALGQLFIFMMVSKFGPLACSVVTTTRKFFT  
VLFSVIFLANPLIARQW  
>Locus\_2768\_Transcript\_4/7\_Confidence\_0.320\_Length\_1304|UNIGENE  
REPRESENTATIVE TRANSCRIPT|sp|Q9VE50|GOSR1\_DROME Golgi SNAP receptor  
complex member 1 OS=Drosophila melanogaster GN=Gos28 PE=2 SV=1|  
e=9.24175E-11|from=2|to=178|frame=2|Fragment\_1  
LRKQARHLENHVDLKLVAFSKMGISSPGCLSS  
>Locus\_2768\_Transcript\_4/7\_Confidence\_0.320\_Length\_1304|UNIGENE  
REPRESENTATIVE TRANSCRIPT|sp|Q9VE50|GOSR1\_DROME Golgi SNAP receptor  
complex member 1 OS=Drosophila melanogaster GN=Gos28 PE=2 SV=1|  
e=9.24175E-11|from=2|to=178|frame=2|Fragment\_2  
GGSDKSPLLVEHICDNMAMEIDGMLDK  
>Locus\_1401\_Transcript\_1/1\_Confidence\_1.000\_Length\_879|. |sp|Q9VE50|

GOSR1\_DROME Golgi SNAP receptor complex member 1 OS=Drosophila melanogaster GN=Gos28 PE=2 SV=1|e=1.86874E-56|from=336|to=878|frame=-2|Fragment\_1  
GEHICDNMAMEIDGMLEKLSTLNEKMSSELPASGAAMLHTIQRHREILQGYKQEFRKIQSN  
HNS  
>Locus\_1401\_Transcript\_1/1\_Confidence\_1.000\_Length\_879|. |sp|Q9VE50|  
GOSR1\_DROME Golgi SNAP receptor complex member 1 OS=Drosophila melanogaster GN=Gos28 PE=2 SV=1|e=1.86874E-56|from=336|to=878|frame=-2|Fragment\_2  
RDNDSSMDKMNSVNAGLNRRDLFLKESHSINSSHNLVNDQISIAVETRDNLLSQRQTFKR  
MKTRFNDINNKFVINNLMQRIRIRKRSDSLILGFVIAVCTILLFLYAFH  
>Locus\_19876\_Transcript\_1/1\_Confidence\_1.000\_Length\_871|UNIGENE REPRESENTATIVE TRANSCRIPT|sp|Q9VEG9|NRM\_DROME Nurim homolog  
OS=Drosophila melanogaster GN=nrm PE=1 SV=1|e=3.99726E-43|from=13|to=723|frame=1|Fragment\_1  
AALLSFLCSFYSAVCLLLFL  
>Locus\_19876\_Transcript\_1/1\_Confidence\_1.000\_Length\_871|UNIGENE REPRESENTATIVE TRANSCRIPT|sp|Q9VEG9|NRM\_DROME Nurim homolog  
OS=Drosophila melanogaster GN=nrm PE=1 SV=1|e=3.99726E-43|from=13|to=723|frame=1|Fragment\_2  
TAHLEH  
>Locus\_19876\_Transcript\_1/1\_Confidence\_1.000\_Length\_871|UNIGENE REPRESENTATIVE TRANSCRIPT|sp|Q9VEG9|NRM\_DROME Nurim homolog  
OS=Drosophila melanogaster GN=nrm PE=1 SV=1|e=3.99726E-43|from=13|to=723|frame=1|Fragment\_3  
DLLEAVYS  
>Locus\_19876\_Transcript\_1/1\_Confidence\_1.000\_Length\_871|UNIGENE REPRESENTATIVE TRANSCRIPT|sp|Q9VEG9|NRM\_DROME Nurim homolog  
OS=Drosophila melanogaster GN=nrm PE=1 SV=1|e=3.99726E-43|from=13|to=723|frame=1|Fragment\_4  
LIKDYALLALFIIQHSCMASSTYKKFIERINLGVIERSIYNFATSLCILLINQWKYVNT  
YKLWDLPTESYPIINSGIFIFHLISWSVIYGGSLMDTPEIFGIKQVIYDVKGLSCPIAY  
KSRELRRLYQHMRHPSFIALFVIFWCTPVMSLDRLLLASMWSLYMLLGWRTDSFDVDYQK  
DQLDRKRHEL  
>Locus\_2718\_Transcript\_3/6\_Confidence\_0.667\_Length\_3396|UNIGENE REPRESENTATIVE TRANSCRIPT|sp|Q9VEI3|S35B2\_DROME Adenosine 3'-phospho 5'-phosphosulfate transporter 1 OS=Drosophila melanogaster GN=sll  
PE=1 SV=1|e=1.6013E-138|from=666|to=2009|frame=-2|Fragment\_1  
IPEIICLLIAGCVGTVFLFSQIIHNAV  
>Locus\_2718\_Transcript\_3/6\_Confidence\_0.667\_Length\_3396|UNIGENE REPRESENTATIVE TRANSCRIPT|sp|Q9VEI3|S35B2\_DROME Adenosine 3'-phospho 5'-phosphosulfate transporter 1 OS=Drosophila melanogaster GN=sll  
PE=1 SV=1|e=1.6013E-138|from=666|to=2009|frame=-2|Fragment\_2  
SSEISLSQIINNQPKEYSWLLRLGLNCIGYVSIFGLYIINKYVHKTNYLDRAGSGYVSC  
LTRMCLSEQELG  
>Locus\_2718\_Transcript\_3/6\_Confidence\_0.667\_Length\_3396|UNIGENE REPRESENTATIVE TRANSCRIPT|sp|Q9VEI3|S35B2\_DROME Adenosine 3'-phospho 5'-phosphosulfate transporter 1 OS=Drosophila melanogaster GN=sll  
PE=1 SV=1|e=1.6013E-138|from=666|to=2009|frame=-2|Fragment\_3  
DTQSQTLSK  
>Locus\_2718\_Transcript\_3/6\_Confidence\_0.667\_Length\_3396|UNIGENE REPRESENTATIVE TRANSCRIPT|sp|Q9VEI3|S35B2\_DROME Adenosine 3'-phospho 5'-phosphosulfate transporter 1 OS=Drosophila melanogaster GN=sll  
PE=1 SV=1|e=1.6013E-138|from=666|to=2009|frame=-2|Fragment\_4

ADLNTKKSFLEECSELLTVCLTGLMGSYLTWGLYQEEIMTHEYINSEGKKTTFNDSQFLVF  
INRSLSFILALIYISIRKQP  
>Locus\_2718\_Transcript\_3/6\_Confidence\_0.667\_Length\_3396|UNIGENE  
REPRESENTATIVE TRANSCRIPT|sp|Q9VEI3|S35B2\_DROME Adenosine 3'-phospho  
5'-phosphosulfate transporter 1 OS=Drosophila melanogaster GN=sll  
PE=1 SV=1|e=1.6013E-138|from=666|to=2009|frame=-2|Fragment\_5  
RHRAPLYKYSFCSFSNIMSAWSQYEALKYVSFPTQVLAKSCKILPVMAMGKIISRVKYEN  
YEYITAALICIGMVFFLFGSTSDHKGNSATTMSGVILLSLYMLFDSFTSNWQGALFKKYS  
MSSIQMMCGVNLFSALFTLISLLQQGGFMESIMFMTQHOKFIGDCILLSISSASGQLFVY  
FTIATFGPVVFTIIMTLRQAIAILLSCIVYGHSITALGIFGVLLVFCAIFLRVYCNQRLK  
SINQKRLNLENKPKVVI  
>Locus\_2718\_Transcript\_4/6\_Confidence\_0.667\_Length\_3396|. |sp|Q9VEI3|  
S35B2\_DROME Adenosine 3'-phospho 5'-phosphosulfate transporter 1  
OS=Drosophila melanogaster GN=sll PE=1 SV=1|e=1.6013E-138|from=666|  
to=2009|frame=-2|Fragment\_1  
IPEIIICLLIAGCVGTVFLFSQIIHNAVG  
>Locus\_2718\_Transcript\_4/6\_Confidence\_0.667\_Length\_3396|. |sp|Q9VEI3|  
S35B2\_DROME Adenosine 3'-phospho 5'-phosphosulfate transporter 1  
OS=Drosophila melanogaster GN=sll PE=1 SV=1|e=1.6013E-138|from=666|  
to=2009|frame=-2|Fragment\_2  
SSEISLSQIINNQPKEYSWLLRLGLNCIGYVSIFGLYIINKYVHKTNYLDRAGSGYVSC  
LTRMCLSEQEKLK  
>Locus\_2718\_Transcript\_4/6\_Confidence\_0.667\_Length\_3396|. |sp|Q9VEI3|  
S35B2\_DROME Adenosine 3'-phospho 5'-phosphosulfate transporter 1  
OS=Drosophila melanogaster GN=sll PE=1 SV=1|e=1.6013E-138|from=666|  
to=2009|frame=-2|Fragment\_3  
DTQSQTLSK  
>Locus\_2718\_Transcript\_4/6\_Confidence\_0.667\_Length\_3396|. |sp|Q9VEI3|  
S35B2\_DROME Adenosine 3'-phospho 5'-phosphosulfate transporter 1  
OS=Drosophila melanogaster GN=sll PE=1 SV=1|e=1.6013E-138|from=666|  
to=2009|frame=-2|Fragment\_4  
ADLNTKKSFLEECSELLTVCLTGLMGSYLTWGLYQEEIMTHEYINSEGKKTTFNDSQFLVF  
INRSLSFILALIYISIRKQP  
>Locus\_2718\_Transcript\_4/6\_Confidence\_0.667\_Length\_3396|. |sp|Q9VEI3|  
S35B2\_DROME Adenosine 3'-phospho 5'-phosphosulfate transporter 1  
OS=Drosophila melanogaster GN=sll PE=1 SV=1|e=1.6013E-138|from=666|  
to=2009|frame=-2|Fragment\_5  
RHRAPLYKYSFCSFSNIMSAWSQYEALKYVSFPTQVLAKSCKILPVMAMGKIISRVKYEN  
YEYITAALICIGMVFFLFGSTSDHKGNSATTMSGVILLSLYMLFDSFTSNWQGALFKKYS  
MSSIQMMCGVNLFSALFTLISLLQQGGFMESIMFMTQHOKFIGDCILLSISSASGQLFVY  
FTIATFGPVVFTIIMTLRQAIAILLSCIVYGHSITALGIFGVLLVFCAIFLRVYCNQRLK  
SINQKRLNLENKPKVVI  
>Locus\_2718\_Transcript\_6/6\_Confidence\_0.667\_Length\_3396|. |sp|Q9VEI3|  
S35B2\_DROME Adenosine 3'-phospho 5'-phosphosulfate transporter 1  
OS=Drosophila melanogaster GN=sll PE=1 SV=1|e=1.6013E-138|from=666|  
to=2009|frame=-2|Fragment\_1  
IPEIIICLLIAGCVGTVFLFSQIIHNAVG  
>Locus\_2718\_Transcript\_6/6\_Confidence\_0.667\_Length\_3396|. |sp|Q9VEI3|  
S35B2\_DROME Adenosine 3'-phospho 5'-phosphosulfate transporter 1  
OS=Drosophila melanogaster GN=sll PE=1 SV=1|e=1.6013E-138|from=666|  
to=2009|frame=-2|Fragment\_2  
SSEISLSQIINNQPKEYSWLLRLGLNCIGYVSIFGLYIINKYVHKTNYLDRAGSGYVSC  
LTRMCLSEQEKLK  
>Locus\_2718\_Transcript\_6/6\_Confidence\_0.667\_Length\_3396|. |sp|Q9VEI3|

S35B2\_DROME Adenosine 3'-phospho 5'-phosphosulfate transporter 1  
OS=Drosophila melanogaster GN=sll PE=1 SV=1|e=1.6013E-138|from=666|  
to=2009|frame=-2|Fragment\_3  
DTQSQTLSK

>Locus\_2718\_Transcript\_6/6\_Confidence\_0.667\_Length\_3396|. |sp|Q9VEI3|  
S35B2\_DROME Adenosine 3'-phospho 5'-phosphosulfate transporter 1  
OS=Drosophila melanogaster GN=sll PE=1 SV=1|e=1.6013E-138|from=666|  
to=2009|frame=-2|Fragment\_4  
ADLNTKKSFLLECSLLTVCLTGLMGSYLTWGLYQEEIMTHEYINSEGKKTTFNDSQFLVF  
INRSLSFILALIYISIRKQP

>Locus\_2718\_Transcript\_6/6\_Confidence\_0.667\_Length\_3396|. |sp|Q9VEI3|  
S35B2\_DROME Adenosine 3'-phospho 5'-phosphosulfate transporter 1  
OS=Drosophila melanogaster GN=sll PE=1 SV=1|e=1.6013E-138|from=666|  
to=2009|frame=-2|Fragment\_5  
RHRAPLYKYSFCSFSNIMSAWSQYEALKYVSFPTQVLAKSCKILPVMAMGKIISRVKYEN  
YEYITAALICIGMVFFLFGSTSDHKGN SATTMSGVILLSLYMLFDSFTSNWQGALFKKYS  
MSSIQMMCGVNLFSALFTLISLLQGGFMESIMFMTQHOKFIGDCILLSISSASGQLFVY  
FTIATFGPVVFTIIMTLRQAI AILLSCIVYGHSITALGIFGVLLVFC AIFLRVYCNQRLK  
SINQKRLNLENKPKVVI

>Locus\_2718\_Transcript\_2/6\_Confidence\_0.667\_Length\_3288|. |sp|Q9VEI3|  
S35B2\_DROME Adenosine 3'-phospho 5'-phosphosulfate transporter 1  
OS=Drosophila melanogaster GN=sll PE=1 SV=1|e=1.5442E-138|from=558|  
to=1901|frame=-2|Fragment\_1  
IPEIIICLLIAGCVGTVFLFSQIIHNAVG

>Locus\_2718\_Transcript\_2/6\_Confidence\_0.667\_Length\_3288|. |sp|Q9VEI3|  
S35B2\_DROME Adenosine 3'-phospho 5'-phosphosulfate transporter 1  
OS=Drosophila melanogaster GN=sll PE=1 SV=1|e=1.5442E-138|from=558|  
to=1901|frame=-2|Fragment\_2  
SSEISLSQIINNQPKEYSWLLRLGLNCIGYVSIFGPLYIINKYVHKTNYLDRAGSGYVSC  
LTRMCLSEQEKLK

>Locus\_2718\_Transcript\_2/6\_Confidence\_0.667\_Length\_3288|. |sp|Q9VEI3|  
S35B2\_DROME Adenosine 3'-phospho 5'-phosphosulfate transporter 1  
OS=Drosophila melanogaster GN=sll PE=1 SV=1|e=1.5442E-138|from=558|  
to=1901|frame=-2|Fragment\_3  
DTQSQTLSK

>Locus\_2718\_Transcript\_2/6\_Confidence\_0.667\_Length\_3288|. |sp|Q9VEI3|  
S35B2\_DROME Adenosine 3'-phospho 5'-phosphosulfate transporter 1  
OS=Drosophila melanogaster GN=sll PE=1 SV=1|e=1.5442E-138|from=558|  
to=1901|frame=-2|Fragment\_4  
ADLNTKKSFLLECSLLTVCLTGLMGSYLTWGLYQEEIMTHEYINSEGKKTTFNDSQFLVF  
INRSLSFILALIYISIRKQP

>Locus\_2718\_Transcript\_2/6\_Confidence\_0.667\_Length\_3288|. |sp|Q9VEI3|  
S35B2\_DROME Adenosine 3'-phospho 5'-phosphosulfate transporter 1  
OS=Drosophila melanogaster GN=sll PE=1 SV=1|e=1.5442E-138|from=558|  
to=1901|frame=-2|Fragment\_5  
RHRAPLYKYSFCSFSNIMSAWSQYEALKYVSFPTQVLAKSCKILPVMAMGKIISRVKYEN  
YEYITAALICIGMVFFLFGSTSDHKGN SATTMSGVILLSLYMLFDSFTSNWQGALFKKYS  
MSSIQMMCGVNLFSALFTLISLLQGGFMESIMFMTQHOKFIGDCILLSISSASGQLFVY  
FTIATFGPVVFTIIMTLRQAI AILLSCIVYGHSITALGIFGVLLVFC AIFLRVYCNQRLK  
SINQKRLNLENKPKVVI

>Locus\_2718\_Transcript\_1/6\_Confidence\_0.667\_Length\_3253|. |sp|Q9VEI3|  
S35B2\_DROME Adenosine 3'-phospho 5'-phosphosulfate transporter 1  
OS=Drosophila melanogaster GN=sll PE=1 SV=1|e=1.5251E-138|from=666|  
to=2009|frame=-3|Fragment\_1

IPEIIICLLIAGCVGTVFLFSQIIHNAV

>Locus\_2718\_Transcript\_1/6\_Confidence\_0.667\_Length\_3253|. |sp|Q9VEI3|  
S35B2\_DROME Adenosine 3'-phospho 5'-phosphosulfate transporter 1  
OS=Drosophila melanogaster GN=sll PE=1 SV=1|e=1.5251E-138|from=666|  
to=2009|frame=-3|Fragment\_2

SSEISLSQIINNQPKEYSWLLRLGLNCIGYVSIFGLYIINKYVHKTNYLDRAGSGYVSC  
LTRMCLSEQEKL

>Locus\_2718\_Transcript\_1/6\_Confidence\_0.667\_Length\_3253|. |sp|Q9VEI3|  
S35B2\_DROME Adenosine 3'-phospho 5'-phosphosulfate transporter 1  
OS=Drosophila melanogaster GN=sll PE=1 SV=1|e=1.5251E-138|from=666|  
to=2009|frame=-3|Fragment\_3

DTQSQTLSK

>Locus\_2718\_Transcript\_1/6\_Confidence\_0.667\_Length\_3253|. |sp|Q9VEI3|  
S35B2\_DROME Adenosine 3'-phospho 5'-phosphosulfate transporter 1  
OS=Drosophila melanogaster GN=sll PE=1 SV=1|e=1.5251E-138|from=666|  
to=2009|frame=-3|Fragment\_4

ADLNTKKSFLLECSLLTVCLTGLMGSYLTWGLYQEEIMTHEYINSEGKKTTFNDSQFLVF  
INRSLSFILALIYISIRKQP

>Locus\_2718\_Transcript\_1/6\_Confidence\_0.667\_Length\_3253|. |sp|Q9VEI3|  
S35B2\_DROME Adenosine 3'-phospho 5'-phosphosulfate transporter 1  
OS=Drosophila melanogaster GN=sll PE=1 SV=1|e=1.5251E-138|from=666|  
to=2009|frame=-3|Fragment\_5

RHRAPLYKYSFCSFSNIMSAWSQYEALKYVSFPTQVLAKSCKILPVMAMGKIISRVKYEN  
YEYITAALICIGMVFFLFGSTSDHKNSATTMSGVILLSLYMLFDSFTSNWQALFKKYS  
MSSIQMMCGVNLFSALFTLISLLQGGFMESIMFMTQHOKFIGDCILLSISSASGQLFVY  
FTIATFGPVVFTIIMTLRQAIALLSCIVYGHISITLGIIFGVLLVFCIFLRVYCNQRLK  
SINQKRLNLENKPKVVI

>Locus\_14167\_Transcript\_1/3\_Confidence\_0.600\_Length\_1039|. |sp|  
Q9VEI3|S35B2\_DROME Adenosine 3'-phospho 5'-phosphosulfate  
transporter 1 OS=Drosophila melanogaster GN=sll PE=1 SV=1|  
e=6.1936E-105|from=146|to=1039|frame=-1|Fragment\_1

LTWGLYQEEIMTHEYINNKGNKTTFNDSQFLVFINRSLSFILALIYITITKQP

>Locus\_14167\_Transcript\_1/3\_Confidence\_0.600\_Length\_1039|. |sp|  
Q9VEI3|S35B2\_DROME Adenosine 3'-phospho 5'-phosphosulfate  
transporter 1 OS=Drosophila melanogaster GN=sll PE=1 SV=1|  
e=6.1936E-105|from=146|to=1039|frame=-1|Fragment\_2

RHRAPLYKYSFCSFSNIMSAWSQYEALKYVSFPTQVLAKSCKILPVMAMGKIISRNKYEN  
YEYITAALICIGMVFLFGSTSDHTDTPATTMSGVIILLSLYMLFDSFTSNWQALFKRYS  
MTSIQMMCGVN

>Locus\_14167\_Transcript\_1/3\_Confidence\_0.600\_Length\_1039|. |sp|  
Q9VEI3|S35B2\_DROME Adenosine 3'-phospho 5'-phosphosulfate  
transporter 1 OS=Drosophila melanogaster GN=sll PE=1 SV=1|  
e=6.1936E-105|from=146|to=1039|frame=-1|Fragment\_3

QGGFMESMIFMTQHOKFIGDCILLSISSASGQLFVYFTIATFGPVVFTIIMTMRQAVAI  
LSCIVYGHNITAIGIFGVLLVFSAILLRVYCNQRLKSINQK

>Locus\_19552\_Transcript\_1/1\_Confidence\_1.000\_Length\_474|UNIGENE  
REPRESENTATIVE TRANSCRIPT|sp|Q9VGG8|MTH5\_DROME Probable G-protein  
coupled receptor Mth-like 5 OS=Drosophila melanogaster GN=mthl5 PE=2  
SV=2|e=1.29188E-56|from=3|to=473|frame=-2|Fragment\_1

INPALHILCIAILLTVAVIYFVLPTRLRDLVGNIIITMSMCLIIITQAADLVRIYTEFSSHV  
SFMVADSVLYVSLQATFFWLSGLGYIWFSTFRSRNVFLRVTDGRKYCWYSGYVWSCTTIM  
AALALFAHYTLDNVKTNNNAVKDTNQPTVGWLGIAVFF

>Locus\_20137\_Transcript\_1/1\_Confidence\_1.000\_Length\_425|. |sp|Q9VGG8|  
MTH5\_DROME Probable G-protein coupled receptor Mth-like 5

OS=Drosophila melanogaster GN=mthl5 PE=2 SV=2|e=5.5555E-20|from=1|to=216|frame=1|Fragment\_1  
WMSMLLSWLNFPLLFYTHVIINALHAPAILYVCVLSQKHVTFLLRKSCCYGQEAVPQNEW  
GDEMTMNGFDY  
>Locus\_10361\_Transcript\_1/1\_Confidence\_1.000\_Length\_410|. |sp|Q9VGG8|MTH5\_DROME Probable G-protein coupled receptor Mth-like 5  
OS=Drosophila melanogaster GN=mthl5 PE=2 SV=2|e=4.2481E-27|from=4|to=378|frame=1|Fragment\_1  
NYVRVNCCEINELKVEDRCTHVNETSAELWQPIFTGLNGEQKVQVKFKFVTGIPQCGST  
EQRHIYHYAASSDKLVLLSNGNLRH  
>Locus\_10361\_Transcript\_1/1\_Confidence\_1.000\_Length\_410|. |sp|Q9VGG8|MTH5\_DROME Probable G-protein coupled receptor Mth-like 5  
OS=Drosophila melanogaster GN=mthl5 PE=2 SV=2|e=4.2481E-27|from=4|to=378|frame=1|Fragment\_2  
GSSEPTYDYIPGLYCMDKIISN  
>Locus\_10556\_Transcript\_2/6\_Confidence\_0.133\_Length\_494|UNIGENE REPRESENTATIVE TRANSCRIPT|sp|Q9VGH7|CLCN2\_DROME Chloride channel protein 2 OS=Drosophila melanogaster GN=Clc-a PE=2 SV=3|e=1.43809E-32|from=29|to=382|frame=2|Fragment\_1  
HVDPAFQLVERTSLLKVHSLFSMVGVDHAYVTTIGKLIGVVALKELRKAIEDANSGNLP  
SSQAPSVPAKSTDCEALKSADTPLLVNSHSQDHHNQNTVTSMDSALSSCENCSDIEMD  
>Locus\_19114\_Transcript\_1/1\_Confidence\_1.000\_Length\_1347|UNIGENE REPRESENTATIVE TRANSCRIPT|sp|Q9VGW1|CAD86\_DROME Cadherin-86C  
OS=Drosophila melanogaster GN=Cad86C PE=2 SV=3|e=6.0527E-122|from=2|to=1201|frame=2|Fragment\_1  
YVIRLDENSPQGTTLFF  
>Locus\_19114\_Transcript\_1/1\_Confidence\_1.000\_Length\_1347|UNIGENE REPRESENTATIVE TRANSCRIPT|sp|Q9VGW1|CAD86\_DROME Cadherin-86C  
OS=Drosophila melanogaster GN=Cad86C PE=2 SV=3|e=6.0527E-122|from=2|to=1201|frame=2|Fragment\_2  
KGVFSLQLIGNNGTFFEISPSVGDVDVTFILRVRDPAMLDYEKMPVLSFQIVAQELGPTTN  
LSAIANVTIFLNDVNDNPPVFLQPEYRADLAENATAGTRVIQVQAKDEDTGPGGRLRYTR  
ILGYRNTSLKLDSETGWITVATNNHGFDSSEEMPEYSFLVEARDADGEGNAATTSVLVSIT  
DVNDNAPHFERDVYEFMLSSGLNFTVPAFLHATDADATSPNNQVRYEIVHGNVDEKFRLL  
DEITGELTVN  
>Locus\_19114\_Transcript\_1/1\_Confidence\_1.000\_Length\_1347|UNIGENE REPRESENTATIVE TRANSCRIPT|sp|Q9VGW1|CAD86\_DROME Cadherin-86C  
OS=Drosophila melanogaster GN=Cad86C PE=2 SV=3|e=6.0527E-122|from=2|to=1201|frame=2|Fragment\_3  
NIKTSRDTSNKQGNGLKPE  
>Locus\_19114\_Transcript\_1/1\_Confidence\_1.000\_Length\_1347|UNIGENE REPRESENTATIVE TRANSCRIPT|sp|Q9VGW1|CAD86\_DROME Cadherin-86C  
OS=Drosophila melanogaster GN=Cad86C PE=2 SV=3|e=6.0527E-122|from=2|to=1201|frame=2|Fragment\_4  
VYAMTVRAYDLGVPHMAATTSVRVYPPESTRARSLMFVVPKPKDLKATADTIRALTGAAV  
TIEDVRPHDTD  
>Locus\_19114\_Transcript\_1/1\_Confidence\_1.000\_Length\_1347|UNIGENE REPRESENTATIVE TRANSCRIPT|sp|Q9VGW1|CAD86\_DROME Cadherin-86C  
OS=Drosophila melanogaster GN=Cad86C PE=2 SV=3|e=6.0527E-122|from=2|to=1201|frame=2|Fragment\_5  
PDKSIVLASLHYTSNSVVDVDQIQRRLL  
>Locus\_30916\_Transcript\_1/1\_Confidence\_1.000\_Length\_419|. |sp|Q9VGW1|CAD86\_DROME Cadherin-86C OS=Drosophila melanogaster GN=Cad86C PE=2 SV=3|e=6.79928E-55|from=3|to=419|frame=-1|Fragment\_1

IMVPEDAKRGTELEFIIARKNPLSQKPVYLELWGSPLFAIRQRLTTPDTTEGVIFLLGPL  
DFETQSMHHLTILANDAFPNPRYDSRNIFELRVAVAVQDVQDTPPVFSSAPPVTSAPLPTL  
LPGDVVARVKAEDGDRGKP  
>Locus\_30094\_Transcript\_1/1\_Confidence\_1.000\_Length\_261|. |sp|Q9VGW1|  
CAD86\_DROME Cadherin-86C OS=Drosophila melanogaster GN=Cad86C PE=2  
SV=3|e=6.03862E-25|from=2|to=259|frame=2|Fragment\_1  
DYPLHFELLEGASSSAFVSLSLPCSTRYNSVCQANVVLRRRLERGRYYDFRVRVADTAGDS  
TTLDCAVSATNGTTPIQDTFPKAPGL  
>Locus\_12723\_Transcript\_1/1\_Confidence\_1.000\_Length\_1179|UNIGENE  
REPRESENTATIVE TRANSCRIPT|sp|Q9VHN5|UNC50\_DROME Protein unc-50  
homolog OS=Drosophila melanogaster GN=CG9773 PE=1 SV=1|  
e=2.22109E-93|from=203|to=1009|frame=2|Fragment\_1  
LLKFKIMKQPRSPSASLFS  
>Locus\_12723\_Transcript\_1/1\_Confidence\_1.000\_Length\_1179|UNIGENE  
REPRESENTATIVE TRANSCRIPT|sp|Q9VHN5|UNC50\_DROME Protein unc-50  
homolog OS=Drosophila melanogaster GN=CG9773 PE=1 SV=1|  
e=2.22109E-93|from=203|to=1009|frame=2|Fragment\_2  
YSRSTSPLPAPINHRHDCMSAFSKIHRVRRLLFKFQQMDFEFAVWQMVYLFIAPOKQVYRN  
FNRYKQTKSQFARDDPAFLVLFVFTGMLCVTSLGFGWVFNLQFSQTLTYFLLYVIFVDCIFMG  
VLVATMFVFTNRYLRINP  
>Locus\_12723\_Transcript\_1/1\_Confidence\_1.000\_Length\_1179|UNIGENE  
REPRESENTATIVE TRANSCRIPT|sp|Q9VHN5|UNC50\_DROME Protein unc-50  
homolog OS=Drosophila melanogaster GN=CG9773 PE=1 SV=1|  
e=2.22109E-93|from=203|to=1009|frame=2|Fragment\_3  
NADVEWGYAFDVHLNAFVPLIILHFLQLFFYYGVISHDLFISRLIGNSFWMMVAVSYYIY  
ITFLGYSCIP  
>Locus\_12723\_Transcript\_1/1\_Confidence\_1.000\_Length\_1179|UNIGENE  
REPRESENTATIVE TRANSCRIPT|sp|Q9VHN5|UNC50\_DROME Protein unc-50  
homolog OS=Drosophila melanogaster GN=CG9773 PE=1 SV=1|  
e=2.22109E-93|from=203|to=1009|frame=2|Fragment\_4  
FVVYLISLAVGWNVSETLINFYLGRV  
>Locus\_21424\_Transcript\_1/1\_Confidence\_1.000\_Length\_743|UNIGENE  
REPRESENTATIVE TRANSCRIPT|sp|Q9VL32|SUR\_DROME ATP-binding cassette  
sub-family C member Sur OS=Drosophila melanogaster GN=Sur PE=1 SV=4|  
e=9.74999E-13|from=12|to=680|frame=-1|Fragment\_1  
SEKPNGHEDIRSKRHTI  
>Locus\_21424\_Transcript\_1/1\_Confidence\_1.000\_Length\_743|UNIGENE  
REPRESENTATIVE TRANSCRIPT|sp|Q9VL32|SUR\_DROME ATP-binding cassette  
sub-family C member Sur OS=Drosophila melanogaster GN=Sur PE=1 SV=4|  
e=9.74999E-13|from=12|to=680|frame=-1|Fragment\_2  
DSPHASNILRQILSKTQNVNKTLSDNKSGEQRNIFRRLA  
>Locus\_21424\_Transcript\_1/1\_Confidence\_1.000\_Length\_743|UNIGENE  
REPRESENTATIVE TRANSCRIPT|sp|Q9VL32|SUR\_DROME ATP-binding cassette  
sub-family C member Sur OS=Drosophila melanogaster GN=Sur PE=1 SV=4|  
e=9.74999E-13|from=12|to=680|frame=-1|Fragment\_3  
DRLSFRRSNRSKEINRHKIIISRLMSDASDITVDLNDLASCETHQISSLSEYNYNQRTAEN  
QERIYGTIPLNIYLYYIKCCGIKICTLYIFLAFWLQGLRFLFADMSLGNWSR  
>Locus\_21424\_Transcript\_1/1\_Confidence\_1.000\_Length\_743|UNIGENE  
REPRESENTATIVE TRANSCRIPT|sp|Q9VL32|SUR\_DROME ATP-binding cassette  
sub-family C member Sur OS=Drosophila melanogaster GN=Sur PE=1 SV=4|  
e=9.74999E-13|from=12|to=680|frame=-1|Fragment\_4  
ENMESYEGF  
>Locus\_21424\_Transcript\_1/1\_Confidence\_1.000\_Length\_743|UNIGENE  
REPRESENTATIVE TRANSCRIPT|sp|Q9VL32|SUR\_DROME ATP-binding cassette

sub-family C member Sur OS=Drosophila melanogaster GN=Sur PE=1 SV=4|  
e=9.74999E-13|from=12|to=680|frame=-1|Fragment\_5  
DQSHEKAFSLLSTYCYQSAICALVSLLCAFSGQWAGLVARSNIHEYL  
>Locus\_26063\_Transcript\_1/1\_Confidence\_1.000\_Length\_355|. |sp|Q9VL32|  
SUR\_DROME ATP-binding cassette sub-family C member Sur OS=Drosophila  
melanogaster GN=Sur PE=1 SV=4|e=6.32552E-22|from=2|to=355|frame=2|  
Fragment\_1  
LHVAYLEIPKGLTLIVGNTGSGKTSFMSAILSEMFLIQSMKWASDTRIAYCAQKPFM  
NASIQENITMFGQHLCDKNCKRYKKVLKLCALDKELTEIQSNLQTIGENGNTLSGG  
>Locus\_15616\_Transcript\_3/3\_Confidence\_0.667\_Length\_785|UNIGENE  
REPRESENTATIVE TRANSCRIPT|sp|Q9VM08|GR28B\_DROME Putative gustatory  
receptor 28b OS=Drosophila melanogaster GN=Gr28b PE=1 SV=2|  
e=1.0971E-17|from=27|to=755|frame=3|Fragment\_1  
IFTTQIIVRLYG  
>Locus\_15616\_Transcript\_3/3\_Confidence\_0.667\_Length\_785|UNIGENE  
REPRESENTATIVE TRANSCRIPT|sp|Q9VM08|GR28B\_DROME Putative gustatory  
receptor 28b OS=Drosophila melanogaster GN=Gr28b PE=1 SV=2|  
e=1.0971E-17|from=27|to=755|frame=3|Fragment\_2  
IYPRASLWFSFVFPNIVSTMIILQFSFYVYILTLRMGLIKTLINNLEIISTSAWLDGDEK  
THNMKQKKY  
>Locus\_15616\_Transcript\_3/3\_Confidence\_0.667\_Length\_785|UNIGENE  
REPRESENTATIVE TRANSCRIPT|sp|Q9VM08|GR28B\_DROME Putative gustatory  
receptor 28b OS=Drosophila melanogaster GN=Gr28b PE=1 SV=2|  
e=1.0971E-17|from=27|to=755|frame=3|Fragment\_3  
ATIIDVIGKLHEKLCEIVDHINAYFNNQMLVLCLDAFVMIVFFAYYSLISIMDYADLAK  
Y  
>Locus\_15616\_Transcript\_3/3\_Confidence\_0.667\_Length\_785|UNIGENE  
REPRESENTATIVE TRANSCRIPT|sp|Q9VM08|GR28B\_DROME Putative gustatory  
receptor 28b OS=Drosophila melanogaster GN=Gr28b PE=1 SV=2|  
e=1.0971E-17|from=27|to=755|frame=3|Fragment\_4  
IGVMAFFLCPFIANICQMIYLVVFCQFYNEITKCYKLLVLINESEKRCTKLRLNQLSI  
QIIIRSPKFSAGGVFILKPTLLRSMVASSSIYLIILFQFSN  
>Locus\_15616\_Transcript\_2/3\_Confidence\_0.667\_Length\_785|. |sp|Q9VM08|  
GR28B\_DROME Putative gustatory receptor 28b OS=Drosophila  
melanogaster GN=Gr28b PE=1 SV=2|e=3.19208E-17|from=27|to=755|  
frame=3|Fragment\_1  
IFTTQIIVRLYG  
>Locus\_15616\_Transcript\_2/3\_Confidence\_0.667\_Length\_785|. |sp|Q9VM08|  
GR28B\_DROME Putative gustatory receptor 28b OS=Drosophila  
melanogaster GN=Gr28b PE=1 SV=2|e=3.19208E-17|from=27|to=755|  
frame=3|Fragment\_2  
IYPRASLWFSFVFPNIVSTMIILQFSFYVYILTLRMGLIKTLINNLEIISTSAWLDGDEK  
R  
>Locus\_15616\_Transcript\_2/3\_Confidence\_0.667\_Length\_785|. |sp|Q9VM08|  
GR28B\_DROME Putative gustatory receptor 28b OS=Drosophila  
melanogaster GN=Gr28b PE=1 SV=2|e=3.19208E-17|from=27|to=755|  
frame=3|Fragment\_3  
HTMKQKKYATIIDVIGKLHEKLCEIVDHINAYFNNQMLVLCLDAFVMIVFFAYYSLISIM  
DYADLAKY  
>Locus\_15616\_Transcript\_2/3\_Confidence\_0.667\_Length\_785|. |sp|Q9VM08|  
GR28B\_DROME Putative gustatory receptor 28b OS=Drosophila  
melanogaster GN=Gr28b PE=1 SV=2|e=3.19208E-17|from=27|to=755|  
frame=3|Fragment\_4  
IGVMAFFLCPFIANICQMIYLVVFCQFYNEITKCYKLLVLINESEKRCTKLRLNQLSI

QIIIRSPKFSAGGVFILKPTLLRSMVASSSIYLILFQFSN  
>Locus\_15616\_Transcript\_1/3\_Confidence\_0.667\_Length\_708|. |sp|Q9VM08|  
GR28B\_DROME Putative gustatory receptor 28b OS=Drosophila  
melanogaster GN=Gr28b PE=1 SV=2|e=6.38409E-11|from=27|to=695|  
frame=3|Fragment\_1  
IFTTQIIVRLYG  
>Locus\_15616\_Transcript\_1/3\_Confidence\_0.667\_Length\_708|. |sp|Q9VM08|  
GR28B\_DROME Putative gustatory receptor 28b OS=Drosophila  
melanogaster GN=Gr28b PE=1 SV=2|e=6.38409E-11|from=27|to=695|  
frame=3|Fragment\_2  
IYPRASLWFSFVFPNIVSTMIIILQFSFYVYILTLRMGLIKTLINNLEIISTSAWLDGDEK  
THNMKQKKY  
>Locus\_15616\_Transcript\_1/3\_Confidence\_0.667\_Length\_708|. |sp|Q9VM08|  
GR28B\_DROME Putative gustatory receptor 28b OS=Drosophila  
melanogaster GN=Gr28b PE=1 SV=2|e=6.38409E-11|from=27|to=695|  
frame=3|Fragment\_3  
ATIIDVIGKLHEKLCEIVDHINAYFNNQMLVLCDAFVMIVFFAYYSLISIMDYEADLAK  
Y  
>Locus\_15616\_Transcript\_1/3\_Confidence\_0.667\_Length\_708|. |sp|Q9VM08|  
GR28B\_DROME Putative gustatory receptor 28b OS=Drosophila  
melanogaster GN=Gr28b PE=1 SV=2|e=6.38409E-11|from=27|to=695|  
frame=3|Fragment\_4  
IGVMTFFLCPFIANICQMICLVVFCQFYNEITNCHKLLVLINESEKRCTK  
>Locus\_15616\_Transcript\_1/3\_Confidence\_0.667\_Length\_708|. |sp|Q9VM08|  
GR28B\_DROME Putative gustatory receptor 28b OS=Drosophila  
melanogaster GN=Gr28b PE=1 SV=2|e=6.38409E-11|from=27|to=695|  
frame=3|Fragment\_5  
PKFSAGGVFILKPTL  
TRANSCRIPT|sp|Q9VMA7|TG01\_DROME Transport and Golgi organization  
protein 1 OS=Drosophila melanogaster GN=Tango1 PE=1 SV=2|  
e=9.84324E-66|from=16|to=1332|frame=1|Fragment\_1  
QDGSLLRKVNTLEQALMVSSKECEILREKLDSTQTKLTSIKEGAFGSNEEVISLQEEKK  
LEATILDK  
>Locus\_2188\_Transcript\_3/6\_Confidence\_0.529\_Length\_1584|UNIGENE  
REPRESENTATIVE TRANSCRIPT|sp|Q9VMA7|TG01\_DROME Transport and Golgi  
organization protein 1 OS=Drosophila melanogaster GN=Tango1 PE=1  
SV=2|e=9.84324E-66|from=16|to=1332|frame=1|Fragment\_2  
ERQLMDLQKEFEAATETGLELNKMLQDMMMTAQKGDIAESMEHAQLQLNEQKETINSMS  
AALATRNKENNDLQSKLNEYEKIETAQKLLNQEKSS  
>Locus\_2188\_Transcript\_3/6\_Confidence\_0.529\_Length\_1584|UNIGENE  
REPRESENTATIVE TRANSCRIPT|sp|Q9VMA7|TG01\_DROME Transport and Golgi  
organization protein 1 OS=Drosophila melanogaster GN=Tango1 PE=1  
SV=2|e=9.84324E-66|from=16|to=1332|frame=1|Fragment\_3  
N  
>Locus\_2188\_Transcript\_3/6\_Confidence\_0.529\_Length\_1584|UNIGENE  
REPRESENTATIVE TRANSCRIPT|sp|Q9VMA7|TG01\_DROME Transport and Golgi  
organization protein 1 OS=Drosophila melanogaster GN=Tango1 PE=1  
SV=2|e=9.84324E-66|from=16|to=1332|frame=1|Fragment\_4  
KIREENAYEIQQVRSVLTET  
>Locus\_2188\_Transcript\_3/6\_Confidence\_0.529\_Length\_1584|UNIGENE  
REPRESENTATIVE TRANSCRIPT|sp|Q9VMA7|TG01\_DROME Transport and Golgi  
organization protein 1 OS=Drosophila melanogaster GN=Tango1 PE=1  
SV=2|e=9.84324E-66|from=16|to=1332|frame=1|Fragment\_5  
QRDLYTKTNQVQLLEDICIKLKSQSGLDVTTELADIAGLRSDLQRTTTELQILKEHDAQES

LLKKKLEENVKTLMN

>Locus\_2188\_Transcript\_3/6\_Confidence\_0.529\_Length\_1584|UNIGENE REPRESENTATIVE TRANSCRIPT|sp|Q9VMA7|TG01\_DROME Transport and Golgi organization protein 1 OS=Drosophila melanogaster GN=Tango1 PE=1 SV=2|e=9.84324E-66|from=16|to=1332|frame=1|Fragment\_6  
QTRLEVLSGYFKEKETQLQKELGIQEALWQQKQGEATSTVERLHSMQDEIQSLKSQNQSL  
HSEIEQQAHAHRSQVTALESRIHEAWLNSRQTQRKLEESRQEASSLRRKLTSLVE

>Locus\_2188\_Transcript\_3/6\_Confidence\_0.529\_Length\_1584|UNIGENE REPRESENTATIVE TRANSCRIPT|sp|Q9VMA7|TG01\_DROME Transport and Golgi organization protein 1 OS=Drosophila melanogaster GN=Tango1 PE=1 SV=2|e=9.84324E-66|from=16|to=1332|frame=1|Fragment\_7  
QENMQKRGSSPLEVQL

>Locus\_2188\_Transcript\_3/6\_Confidence\_0.529\_Length\_1584|UNIGENE REPRESENTATIVE TRANSCRIPT|sp|Q9VMA7|TG01\_DROME Transport and Golgi organization protein 1 OS=Drosophila melanogaster GN=Tango1 PE=1 SV=2|e=9.84324E-66|from=16|to=1332|frame=1|Fragment\_8  
SAQSPI

>Locus\_2188\_Transcript\_1/6\_Confidence\_0.588\_Length\_1584|. |sp|Q9VMA7|TG01\_DROME Transport and Golgi organization protein 1 OS=Drosophila melanogaster GN=Tango1 PE=1 SV=2|e=1.28557E-65|from=16|to=1332|frame=1|Fragment\_1  
QDGSLLRKVNTLEQALMVSSKECEILREKLDSTQTKLTSIKEGAFGSNEEVISLQEEKKK  
LEATILDK

>Locus\_2188\_Transcript\_1/6\_Confidence\_0.588\_Length\_1584|. |sp|Q9VMA7|TG01\_DROME Transport and Golgi organization protein 1 OS=Drosophila melanogaster GN=Tango1 PE=1 SV=2|e=1.28557E-65|from=16|to=1332|frame=1|Fragment\_2  
ERQLMDLQKEFEAATETGLELNKMLQDMMMTAQKGDITAESEHAQLQLNEQKETINSMS  
AALATRNKENNDLQSKLNEYEKQIETVQKLLNQEKSS

>Locus\_2188\_Transcript\_1/6\_Confidence\_0.588\_Length\_1584|. |sp|Q9VMA7|TG01\_DROME Transport and Golgi organization protein 1 OS=Drosophila melanogaster GN=Tango1 PE=1 SV=2|e=1.28557E-65|from=16|to=1332|frame=1|Fragment\_3  
N

>Locus\_2188\_Transcript\_1/6\_Confidence\_0.588\_Length\_1584|. |sp|Q9VMA7|TG01\_DROME Transport and Golgi organization protein 1 OS=Drosophila melanogaster GN=Tango1 PE=1 SV=2|e=1.28557E-65|from=16|to=1332|frame=1|Fragment\_4  
KIREENAYEIQQVRSVLTET

>Locus\_2188\_Transcript\_1/6\_Confidence\_0.588\_Length\_1584|. |sp|Q9VMA7|TG01\_DROME Transport and Golgi organization protein 1 OS=Drosophila melanogaster GN=Tango1 PE=1 SV=2|e=1.28557E-65|from=16|to=1332|frame=1|Fragment\_5  
QRDLYTKTNQVQLLEDCKIKLKSQSOLDVTELADIAGLRSDLQRTTTELQILKEHDAQES  
LLKKKLEENVKTLMN

>Locus\_2188\_Transcript\_1/6\_Confidence\_0.588\_Length\_1584|. |sp|Q9VMA7|TG01\_DROME Transport and Golgi organization protein 1 OS=Drosophila melanogaster GN=Tango1 PE=1 SV=2|e=1.28557E-65|from=16|to=1332|frame=1|Fragment\_6  
QTRLEVLSGYFKEKETQLQKELGIQEALWQQKQGEATSTVERLHSMQDEIQSLKSQNQSL  
HSEIEQQAHAHRSQVTALESRIHEAWLNSRQTQRKLEESRQEASSLRRKLTSLVE

>Locus\_2188\_Transcript\_1/6\_Confidence\_0.588\_Length\_1584|. |sp|Q9VMA7|TG01\_DROME Transport and Golgi organization protein 1 OS=Drosophila melanogaster GN=Tango1 PE=1 SV=2|e=1.28557E-65|from=16|to=1332|

frame=1|Fragment\_7  
QENMQKRGSSPLEVQL  
>Locus\_2188\_Transcript\_1/6\_Confidence\_0.588\_Length\_1584|. |sp|Q9VMA7|  
TG01\_DROME Transport and Golgi organization protein 1 OS=Drosophila  
melanogaster GN=Tango1 PE=1 SV=2|e=1.28557E-65|from=16|to=1332|  
frame=1|Fragment\_8  
SAQSPI  
>Locus\_2188\_Transcript\_2/6\_Confidence\_0.647\_Length\_1584|. |sp|Q9VMA7|  
TG01\_DROME Transport and Golgi organization protein 1 OS=Drosophila  
melanogaster GN=Tango1 PE=1 SV=2|e=1.28557E-65|from=16|to=1332|  
frame=1|Fragment\_1  
QDGSLLRKVNTLEQALMVSSKECEILREKLDSTQTKLTSIKEGAFGSNEEVISLQEEKKK  
LEATILDK  
>Locus\_2188\_Transcript\_2/6\_Confidence\_0.647\_Length\_1584|. |sp|Q9VMA7|  
TG01\_DROME Transport and Golgi organization protein 1 OS=Drosophila  
melanogaster GN=Tango1 PE=1 SV=2|e=1.28557E-65|from=16|to=1332|  
frame=1|Fragment\_2  
ERQLMDLQKEFEAATETGLELNKMLQDMMMTAQKGDITAESEHAQLQLNEQKETINSMS  
AALATRNKENNDLQSKLNEYEQIETVQKLLNQEKSS  
>Locus\_2188\_Transcript\_2/6\_Confidence\_0.647\_Length\_1584|. |sp|Q9VMA7|  
TG01\_DROME Transport and Golgi organization protein 1 OS=Drosophila  
melanogaster GN=Tango1 PE=1 SV=2|e=1.28557E-65|from=16|to=1332|  
frame=1|Fragment\_3  
N  
>Locus\_2188\_Transcript\_2/6\_Confidence\_0.647\_Length\_1584|. |sp|Q9VMA7|  
TG01\_DROME Transport and Golgi organization protein 1 OS=Drosophila  
melanogaster GN=Tango1 PE=1 SV=2|e=1.28557E-65|from=16|to=1332|  
frame=1|Fragment\_4  
KIREENAYEIQVRSVLTET  
>Locus\_2188\_Transcript\_2/6\_Confidence\_0.647\_Length\_1584|. |sp|Q9VMA7|  
TG01\_DROME Transport and Golgi organization protein 1 OS=Drosophila  
melanogaster GN=Tango1 PE=1 SV=2|e=1.28557E-65|from=16|to=1332|  
frame=1|Fragment\_5  
QRDLYTKTNQVQLLEDICIKKLKSGSQLDVTELADIAGLRSDLQRTTTELQILKEHDAQES  
LLKKKLEENVKTLMN  
>Locus\_2188\_Transcript\_2/6\_Confidence\_0.647\_Length\_1584|. |sp|Q9VMA7|  
TG01\_DROME Transport and Golgi organization protein 1 OS=Drosophila  
melanogaster GN=Tango1 PE=1 SV=2|e=1.28557E-65|from=16|to=1332|  
frame=1|Fragment\_6  
QTRLEVLSGYFKEKETQLQKELGIQEALWQQKQGEATSTVERLHSMQDEIQSLKSNQSL  
HSEIEQQAHRSQVTALESRIHEAWLNSRQTQRKLEESRQEASSLRKLTSLVE  
>Locus\_2188\_Transcript\_2/6\_Confidence\_0.647\_Length\_1584|. |sp|Q9VMA7|  
TG01\_DROME Transport and Golgi organization protein 1 OS=Drosophila  
melanogaster GN=Tango1 PE=1 SV=2|e=1.28557E-65|from=16|to=1332|  
frame=1|Fragment\_7  
QENMQKRGSSPLEVQL  
>Locus\_2188\_Transcript\_2/6\_Confidence\_0.647\_Length\_1584|. |sp|Q9VMA7|  
TG01\_DROME Transport and Golgi organization protein 1 OS=Drosophila  
melanogaster GN=Tango1 PE=1 SV=2|e=1.28557E-65|from=16|to=1332|  
frame=1|Fragment\_8  
SAQSPI  
>Locus\_2188\_Transcript\_4/6\_Confidence\_0.706\_Length\_1584|. |sp|Q9VMA7|  
TG01\_DROME Transport and Golgi organization protein 1 OS=Drosophila  
melanogaster GN=Tango1 PE=1 SV=2|e=1.28557E-65|from=16|to=1332|

frame=1|Fragment\_1  
QDGSLLRKVNTLEQALMVSSKECEILREKLDSTQTKLTSIKEGAFGSNEEVISLQEEKKK  
LEATILDK  
>Locus\_2188\_Transcript\_4/6\_Confidence\_0.706\_Length\_1584|. |sp|Q9VMA7|  
TG01\_DROME Transport and Golgi organization protein 1 OS=Drosophila  
melanogaster GN=Tango1 PE=1 SV=2|e=1.28557E-65|from=16|to=1332|  
frame=1|Fragment\_2  
ERQLMDLQKEFEAAATETGLELNKMLQDMMMTAQKGDITIAESMEHAQLQLNEQKETINSMS  
AALATRNKENNDLQSKLNEYEKIETVQKLLNQEKSS  
>Locus\_2188\_Transcript\_4/6\_Confidence\_0.706\_Length\_1584|. |sp|Q9VMA7|  
TG01\_DROME Transport and Golgi organization protein 1 OS=Drosophila  
melanogaster GN=Tango1 PE=1 SV=2|e=1.28557E-65|from=16|to=1332|  
frame=1|Fragment\_3  
N  
>Locus\_2188\_Transcript\_4/6\_Confidence\_0.706\_Length\_1584|. |sp|Q9VMA7|  
TG01\_DROME Transport and Golgi organization protein 1 OS=Drosophila  
melanogaster GN=Tango1 PE=1 SV=2|e=1.28557E-65|from=16|to=1332|  
frame=1|Fragment\_4  
KIREENAYEIQVRSVLTET  
>Locus\_2188\_Transcript\_4/6\_Confidence\_0.706\_Length\_1584|. |sp|Q9VMA7|  
TG01\_DROME Transport and Golgi organization protein 1 OS=Drosophila  
melanogaster GN=Tango1 PE=1 SV=2|e=1.28557E-65|from=16|to=1332|  
frame=1|Fragment\_5  
QRDLYTKTNQVQLLEDICIKKLSGSQLDVTELAADIAGLRSDLQRTTTELQILKEHDAQES  
LLKKKLEENVKTLMN  
>Locus\_2188\_Transcript\_4/6\_Confidence\_0.706\_Length\_1584|. |sp|Q9VMA7|  
TG01\_DROME Transport and Golgi organization protein 1 OS=Drosophila  
melanogaster GN=Tango1 PE=1 SV=2|e=1.28557E-65|from=16|to=1332|  
frame=1|Fragment\_6  
QTRLEVLSGYFKEKETQLQKELGIQEALWQQKQGEATSTVERLHSMQDEIQSLKSQNQSL  
HSEIEQQAHAHRSQVTALESRIHEAWLNSRQTRKLEESRQEASSLRKLTSLVE  
>Locus\_2188\_Transcript\_4/6\_Confidence\_0.706\_Length\_1584|. |sp|Q9VMA7|  
TG01\_DROME Transport and Golgi organization protein 1 OS=Drosophila  
melanogaster GN=Tango1 PE=1 SV=2|e=1.28557E-65|from=16|to=1332|  
frame=1|Fragment\_7  
QENMQKRGSSPLEVQL  
>Locus\_2188\_Transcript\_4/6\_Confidence\_0.706\_Length\_1584|. |sp|Q9VMA7|  
TG01\_DROME Transport and Golgi organization protein 1 OS=Drosophila  
melanogaster GN=Tango1 PE=1 SV=2|e=1.28557E-65|from=16|to=1332|  
frame=1|Fragment\_8  
SAQSPI  
>Locus\_2188\_Transcript\_5/6\_Confidence\_0.647\_Length\_1584|. |sp|Q9VMA7|  
TG01\_DROME Transport and Golgi organization protein 1 OS=Drosophila  
melanogaster GN=Tango1 PE=1 SV=2|e=1.28557E-65|from=16|to=1332|  
frame=1|Fragment\_1  
QDGSLLRKVNTLEQALMVSSKECEILREKLDSTQTKLTSIKEGAFGSNEEVISLQEEKKK  
LEATILDK  
>Locus\_2188\_Transcript\_5/6\_Confidence\_0.647\_Length\_1584|. |sp|Q9VMA7|  
TG01\_DROME Transport and Golgi organization protein 1 OS=Drosophila  
melanogaster GN=Tango1 PE=1 SV=2|e=1.28557E-65|from=16|to=1332|  
frame=1|Fragment\_2  
ERQLMDLQKEFEAAATETGLELNKMLQDMMMTAQKGDITIAESMEHAQLQLNEQKETINSMS  
AALATRNKENNDLQSKLNEYEKIETVQKLLNQEKSS  
>Locus\_2188\_Transcript\_5/6\_Confidence\_0.647\_Length\_1584|. |sp|Q9VMA7|

TG01\_DROME Transport and Golgi organization protein 1 OS=Drosophila melanogaster GN=Tango1 PE=1 SV=2|e=1.28557E-65|from=16|to=1332|frame=1|Fragment\_3

N

>Locus\_2188\_Transcript\_5/6\_Confidence\_0.647\_Length\_1584|. |sp|Q9VMA7|TG01\_DROME Transport and Golgi organization protein 1 OS=Drosophila melanogaster GN=Tango1 PE=1 SV=2|e=1.28557E-65|from=16|to=1332|frame=1|Fragment\_4

KIREENAYEIQVRSVLTET

>Locus\_2188\_Transcript\_5/6\_Confidence\_0.647\_Length\_1584|. |sp|Q9VMA7|TG01\_DROME Transport and Golgi organization protein 1 OS=Drosophila melanogaster GN=Tango1 PE=1 SV=2|e=1.28557E-65|from=16|to=1332|frame=1|Fragment\_5

QRDLYTKTNQVQLLEDCKIKLKSQSLDVTELDIAGLRSDLQRTTTELQILKEHDAQES  
LLKKKLEENVKTLMN

>Locus\_2188\_Transcript\_5/6\_Confidence\_0.647\_Length\_1584|. |sp|Q9VMA7|TG01\_DROME Transport and Golgi organization protein 1 OS=Drosophila melanogaster GN=Tango1 PE=1 SV=2|e=1.28557E-65|from=16|to=1332|frame=1|Fragment\_6

QTRLEVLSGYFKEKETQLQKELGIQEALWQQKQGEATSTVERLHSMQDEIQSLKSQNQSL  
HSEIEQAAAHRVQVTALESRIHEAWLNSRQTQRKLEESRQEASSLRKLTSLVE

>Locus\_2188\_Transcript\_5/6\_Confidence\_0.647\_Length\_1584|. |sp|Q9VMA7|TG01\_DROME Transport and Golgi organization protein 1 OS=Drosophila melanogaster GN=Tango1 PE=1 SV=2|e=1.28557E-65|from=16|to=1332|frame=1|Fragment\_7

QENMQKRGSSPLEVQL

>Locus\_2188\_Transcript\_5/6\_Confidence\_0.647\_Length\_1584|. |sp|Q9VMA7|TG01\_DROME Transport and Golgi organization protein 1 OS=Drosophila melanogaster GN=Tango1 PE=1 SV=2|e=1.28557E-65|from=16|to=1332|frame=1|Fragment\_8

SAQSPI

>Locus\_2188\_Transcript\_6/6\_Confidence\_0.647\_Length\_1584|. |sp|Q9VMA7|TG01\_DROME Transport and Golgi organization protein 1 OS=Drosophila melanogaster GN=Tango1 PE=1 SV=2|e=1.28557E-65|from=16|to=1332|frame=1|Fragment\_1

QDGSLLRKVNTLEQALMVSSKECEILREKLDSTQTKLTSIKEGAFGSNEEVISLQEEKKK  
LEATILDK

>Locus\_2188\_Transcript\_6/6\_Confidence\_0.647\_Length\_1584|. |sp|Q9VMA7|TG01\_DROME Transport and Golgi organization protein 1 OS=Drosophila melanogaster GN=Tango1 PE=1 SV=2|e=1.28557E-65|from=16|to=1332|frame=1|Fragment\_2

ERQLMDLQKEFEAATETGLELNKMLQDMMMTAQKGDITAESEMEHAQLQLNEQKETINSMS  
AALATRNKENNDLQSKLNEYEKQIETVQKLLNQEKSS

>Locus\_2188\_Transcript\_6/6\_Confidence\_0.647\_Length\_1584|. |sp|Q9VMA7|TG01\_DROME Transport and Golgi organization protein 1 OS=Drosophila melanogaster GN=Tango1 PE=1 SV=2|e=1.28557E-65|from=16|to=1332|frame=1|Fragment\_3

N

>Locus\_2188\_Transcript\_6/6\_Confidence\_0.647\_Length\_1584|. |sp|Q9VMA7|TG01\_DROME Transport and Golgi organization protein 1 OS=Drosophila melanogaster GN=Tango1 PE=1 SV=2|e=1.28557E-65|from=16|to=1332|frame=1|Fragment\_4

KIREENAYEIQVRSVLTET

>Locus\_2188\_Transcript\_6/6\_Confidence\_0.647\_Length\_1584|. |sp|Q9VMA7|

TG01\_DROME Transport and Golgi organization protein 1 OS=Drosophila melanogaster GN=Tango1 PE=1 SV=2|e=1.28557E-65|from=16|to=1332|frame=1|Fragment\_5  
QRDLYTKTNQVQLLEDICIKLKSQSLDVTELDIAGLRSDLQRTTTELQILKEHDAQES  
LLKKKLEENVKTLMN  
>Locus\_2188\_Transcript\_6/6\_Confidence\_0.647\_Length\_1584|. |sp|Q9VMA7|  
TG01\_DROME Transport and Golgi organization protein 1 OS=Drosophila melanogaster GN=Tango1 PE=1 SV=2|e=1.28557E-65|from=16|to=1332|frame=1|Fragment\_6  
QTRLEVLSGYFKEKETQLQKELGIQEALWQQKQGEATSTVERLHSMQDEIQSLKSQNQSL  
HSEIEQQAHAHRSQVTALESRIHEAWLNSRQTQRKLEESRQEASSLRKLTSLVE  
>Locus\_2188\_Transcript\_6/6\_Confidence\_0.647\_Length\_1584|. |sp|Q9VMA7|  
TG01\_DROME Transport and Golgi organization protein 1 OS=Drosophila melanogaster GN=Tango1 PE=1 SV=2|e=1.28557E-65|from=16|to=1332|frame=1|Fragment\_7  
QENMQKRGSSPLEVQL  
>Locus\_2188\_Transcript\_6/6\_Confidence\_0.647\_Length\_1584|. |sp|Q9VMA7|  
TG01\_DROME Transport and Golgi organization protein 1 OS=Drosophila melanogaster GN=Tango1 PE=1 SV=2|e=1.28557E-65|from=16|to=1332|frame=1|Fragment\_8  
SAQSPI  
>Locus\_7633\_Transcript\_1/1\_Confidence\_1.000\_Length\_383|UNIGENE REPRESENTATIVE TRANSCRIPT|sp|Q9VMW8|MPU1\_DROME Mannose-P-dolichol utilization defect 1 protein homolog OS=Drosophila melanogaster GN=CG3792 PE=1 SV=2|e=1.16228E-12|from=3|to=200|frame=-1|Fragment\_1  
CYHNYFEDFNFLDVPCFKAT  
>Locus\_7633\_Transcript\_1/1\_Confidence\_1.000\_Length\_383|UNIGENE REPRESENTATIVE TRANSCRIPT|sp|Q9VMW8|MPU1\_DROME Mannose-P-dolichol utilization defect 1 protein homolog OS=Drosophila melanogaster GN=CG3792 PE=1 SV=2|e=1.16228E-12|from=3|to=200|frame=-1|Fragment\_2  
LVKVPQILKISSNKSQGINILSVLLDLFVIT  
>Locus\_13968\_Transcript\_1/1\_Confidence\_1.000\_Length\_383|. |sp|Q9VMW8|MPU1\_DROME Mannose-P-dolichol utilization defect 1 protein homolog OS=Drosophila melanogaster GN=CG3792 PE=1 SV=2|e=1.16228E-12|from=3|to=200|frame=-1|Fragment\_1  
CYHNYFEDFNFLDVPCFKAT  
>Locus\_13968\_Transcript\_1/1\_Confidence\_1.000\_Length\_383|. |sp|Q9VMW8|MPU1\_DROME Mannose-P-dolichol utilization defect 1 protein homolog OS=Drosophila melanogaster GN=CG3792 PE=1 SV=2|e=1.16228E-12|from=3|to=200|frame=-1|Fragment\_2  
LVKVPQILKISSNKSQGINILSVLLDLFVIT  
>Locus\_1489\_Transcript\_1/3\_Confidence\_0.714\_Length\_2216|UNIGENE REPRESENTATIVE TRANSCRIPT|sp|Q9VNB5|OR83B\_DROME Odorant receptor coreceptor OS=Drosophila melanogaster GN=Orco PE=1 SV=2|e=6.5818E-175|from=953|to=2215|frame=-2|Fragment\_1  
QYGSLFANLATHTGDVAELTANTITVLFHPITKNIYFAVNSASFYRTWGIWNQSNQSHPLFAESNARYHSIALAKMRLLVAVVITSLLSVAWTTLTFFGDSTRVMDMETNETMTEPVPRLMLRAWYPWPSMSGPMYMFGLQLYYLTFSLQSNLLDVLFCSWLIFACEQLQHLK  
GIMRPLMELSSVLDYRPSAALFRITTSANSQTELPNDNDV  
>Locus\_1489\_Transcript\_1/3\_Confidence\_0.714\_Length\_2216|UNIGENE REPRESENTATIVE TRANSCRIPT|sp|Q9VNB5|OR83B\_DROME Odorant receptor coreceptor OS=Drosophila melanogaster GN=Orco PE=1 SV=2|e=6.5818E-175|from=953|to=2215|frame=-2|Fragment\_2  
KDIDAAAIYNSKADWGAHYRGPVSLQNFNQ

>Locus\_1489\_Transcript\_1/3\_Confidence\_0.714\_Length\_2216|UNIGENE REPRESENTATIVE TRANSCRIPT|sp|Q9VNB5|OR83B\_DROME Odorant receptor coreceptor OS=Drosophila melanogaster GN=Orco PE=1 SV=2|e=6.5818E-175|from=953|to=2215|frame=-2|Fragment\_3  
GAN

>Locus\_1489\_Transcript\_1/3\_Confidence\_0.714\_Length\_2216|UNIGENE REPRESENTATIVE TRANSCRIPT|sp|Q9VNB5|OR83B\_DROME Odorant receptor coreceptor OS=Drosophila melanogaster GN=Orco PE=1 SV=2|e=6.5818E-175|from=953|to=2215|frame=-2|Fragment\_4  
NPNGLTKKQEMMVRSAIKYWVERHKHVRLVAGIGDYGALLHMLTSTITLTLAYQA  
TKIDRLNVFAFGVIGYLVYSLAQVFLFCVFGNRLIEESSVMEEAAYSCHWYDGSSEAKTF  
VQIVCQQCQKAMTISGAKFFTVSLDLFASVLGAVVTYFMVLVQLK

>Locus\_1489\_Transcript\_2/3\_Confidence\_0.714\_Length\_2216|. |sp|Q9VNB5|OR83B\_DROME Odorant receptor coreceptor OS=Drosophila melanogaster GN=Orco PE=1 SV=2|e=6.5818E-175|from=953|to=2215|frame=-2|Fragment\_1  
QYGSFLANLATHTGDVAELTANTITVLFHPITKNIYFAVNSASFYRTWGIWNQSNHP  
LFAESNARYHSIALAKMRLLVAVVITSLLSVAAWTTLTFFGDSTRVMDMETNETMTEP  
VPRLMLRAWYPWPSMSGPMYISFGLQLYYLTFSLQSNLLDVLFCSWLIFACEQLQHLK  
GIMRPLMELSSVLDYRPSAALFRITTSANSQTELIPNDDNDV

>Locus\_1489\_Transcript\_2/3\_Confidence\_0.714\_Length\_2216|. |sp|Q9VNB5|OR83B\_DROME Odorant receptor coreceptor OS=Drosophila melanogaster GN=Orco PE=1 SV=2|e=6.5818E-175|from=953|to=2215|frame=-2|Fragment\_2  
KDIDAAAIYNSKADWGAHYRGPVSLQNFNQ

>Locus\_1489\_Transcript\_2/3\_Confidence\_0.714\_Length\_2216|. |sp|Q9VNB5|OR83B\_DROME Odorant receptor coreceptor OS=Drosophila melanogaster GN=Orco PE=1 SV=2|e=6.5818E-175|from=953|to=2215|frame=-2|Fragment\_3  
GAN

>Locus\_1489\_Transcript\_2/3\_Confidence\_0.714\_Length\_2216|. |sp|Q9VNB5|OR83B\_DROME Odorant receptor coreceptor OS=Drosophila melanogaster GN=Orco PE=1 SV=2|e=6.5818E-175|from=953|to=2215|frame=-2|Fragment\_4  
NPNGLTKKQEMMVRSAIKYWVERHKHVRLVAGIGDYGALLHMLTSTITLTLAYQA  
TKIDRLNVFAFGVIGYLVYSLAQVFLFCVFGNRLIEESSVMEEAAYSCHWYDGSSEAKTF  
VQIVCQQCQKAMTISGAKFFTVSLDLFASVLGAVVTYFMVLVQLK

>Locus\_1489\_Transcript\_3/3\_Confidence\_0.714\_Length\_2216|. |sp|Q9VNB5|OR83B\_DROME Odorant receptor coreceptor OS=Drosophila melanogaster GN=Orco PE=1 SV=2|e=6.5818E-175|from=953|to=2215|frame=-2|Fragment\_1  
QYGSFLANLATHTGDVAELTANTITVLFHPITKNIYFAVNSASFYRTWGIWNQSNHP  
LFAESNARYHSIALAKMRLLVAVVITSLLSVAAWTTLTFFGDSTRVMDMETNETMTEP  
VPRLMLRAWYPWPSMSGPMYISFGLQLYYLTFSLQSNLLDVLFCSWLIFACEQLQHLK  
GIMRPLMELSSVLDYRPSAALFRITTSANSQTELIPNDDNDV

>Locus\_1489\_Transcript\_3/3\_Confidence\_0.714\_Length\_2216|. |sp|Q9VNB5|OR83B\_DROME Odorant receptor coreceptor OS=Drosophila melanogaster GN=Orco PE=1 SV=2|e=6.5818E-175|from=953|to=2215|frame=-2|Fragment\_2  
KDIDAAAIYNSKADWGAHYRGPVSLQNFNQ

>Locus\_1489\_Transcript\_3/3\_Confidence\_0.714\_Length\_2216|. |sp|Q9VNB5|OR83B\_DROME Odorant receptor coreceptor OS=Drosophila melanogaster GN=Orco PE=1 SV=2|e=6.5818E-175|from=953|to=2215|frame=-2|Fragment\_3  
GAN

>Locus\_1489\_Transcript\_3/3\_Confidence\_0.714\_Length\_2216|. |sp|Q9VNB5|OR83B\_DROME Odorant receptor coreceptor OS=Drosophila melanogaster GN=Orco PE=1 SV=2|e=6.5818E-175|from=953|to=2215|frame=-2|Fragment\_4  
NPNGLTKKQEMMVRSAIKYWVERHKHVRLVAGIGDYGALLHMLTSTITLTLAYQA  
TKIDRLNVFAFGVIGYLVYSLAQVFLFCVFGNRLIEESSVMEEAAYSCHWYDGSSEAKTF  
VQIVCQQCQKAMTISGAKFFTVSLDLFASVLGAVVTYFMVLVQLK

>Locus\_6731\_Transcript\_3/3\_Confidence\_0.667\_Length\_2064|UNIGENE  
REPRESENTATIVE TRANSCRIPT|sp|Q9VPF8|TM104\_DROME Transmembrane  
protein 104 homolog OS=Drosophila melanogaster GN=CG5262 PE=2 SV=2|  
e=1.155E-149|from=442|to=1860|frame=-1|Fragment\_1  
YSSWMGLVYVFNLIIVGTGALTLPAVAFARAGWGLGLAAIIVLAFISFVTVTFVIETMSCAN  
ALMHWKRLGLLKREKCITD

>Locus\_6731\_Transcript\_3/3\_Confidence\_0.667\_Length\_2064|UNIGENE  
REPRESENTATIVE TRANSCRIPT|sp|Q9VPF8|TM104\_DROME Transmembrane  
protein 104 homolog OS=Drosophila melanogaster GN=CG5262 PE=2 SV=2|  
e=1.155E-149|from=442|to=1860|frame=-1|Fragment\_2  
EDCADEIS

>Locus\_6731\_Transcript\_3/3\_Confidence\_0.667\_Length\_2064|UNIGENE  
REPRESENTATIVE TRANSCRIPT|sp|Q9VPF8|TM104\_DROME Transmembrane  
protein 104 homolog OS=Drosophila melanogaster GN=CG5262 PE=2 SV=2|  
e=1.155E-149|from=442|to=1860|frame=-1|Fragment\_3  
EDSFEIDNLERHPL

>Locus\_6731\_Transcript\_3/3\_Confidence\_0.667\_Length\_2064|UNIGENE  
REPRESENTATIVE TRANSCRIPT|sp|Q9VPF8|TM104\_DROME Transmembrane  
protein 104 homolog OS=Drosophila melanogaster GN=CG5262 PE=2 SV=2|  
e=1.155E-149|from=442|to=1860|frame=-1|Fragment\_4  
MSRMPRFYEIDHQVELGEMASMFNTAGRSVLYLCLCIYLYGDLSIYCAAVSESLVDITC

>Locus\_6731\_Transcript\_3/3\_Confidence\_0.667\_Length\_2064|UNIGENE  
REPRESENTATIVE TRANSCRIPT|sp|Q9VPF8|TM104\_DROME Transmembrane  
protein 104 homolog OS=Drosophila melanogaster GN=CG5262 PE=2 SV=2|  
e=1.155E-149|from=442|to=1860|frame=-1|Fragment\_5  
YIPANNTNNTILPCFPSEENSISRITVYNLCLSAFFCLMGPFVAFVQKTKYLQMITSL  
RWLAFSIMIGIASWRLATQGPQSQPSVAQVSGVPLFGACVYSFMCHHSIPSLVAPIRNL  
SSLKLLSCDYFLICVFYIVLAVTGTFAFANLEDLYTLNFLPSPD

>Locus\_6731\_Transcript\_3/3\_Confidence\_0.667\_Length\_2064|UNIGENE  
REPRESENTATIVE TRANSCRIPT|sp|Q9VPF8|TM104\_DROME Transmembrane  
protein 104 homolog OS=Drosophila melanogaster GN=CG5262 PE=2 SV=2|  
e=1.155E-149|from=442|to=1860|frame=-1|Fragment\_6  
SVMMLAHYFLALFPVFTLSASFPIIAITLRLNLQTLFLDNSRIESYNFFVRKMCFPPLA  
IVPPFLVAIGARSLGLVGFVTSYAGTGVQYLVIPLVYSARRQCNTIPALRHENQFKSP  
FKSNLWLIIFILLWSIACVVLVSVNLFA

>Locus\_6731\_Transcript\_2/3\_Confidence\_0.667\_Length\_2064|. |sp|Q9VPF8|  
TM104\_DROME Transmembrane protein 104 homolog OS=Drosophila  
melanogaster GN=CG5262 PE=2 SV=2|e=2.573E-149|from=442|to=1860|  
frame=-1|Fragment\_1  
YSSWMGLVYVFNLIIVGTGALTLPAVFSRAGWGLGLAAIIVLAFISFVTVTFVIETMSCAN  
ALMHWKRLGLLKREKCITD

>Locus\_6731\_Transcript\_2/3\_Confidence\_0.667\_Length\_2064|. |sp|Q9VPF8|  
TM104\_DROME Transmembrane protein 104 homolog OS=Drosophila  
melanogaster GN=CG5262 PE=2 SV=2|e=2.573E-149|from=442|to=1860|  
frame=-1|Fragment\_2  
EDCADEIS

>Locus\_6731\_Transcript\_2/3\_Confidence\_0.667\_Length\_2064|. |sp|Q9VPF8|  
TM104\_DROME Transmembrane protein 104 homolog OS=Drosophila  
melanogaster GN=CG5262 PE=2 SV=2|e=2.573E-149|from=442|to=1860|  
frame=-1|Fragment\_3  
EDSFEIDNLERHPL

>Locus\_6731\_Transcript\_2/3\_Confidence\_0.667\_Length\_2064|. |sp|Q9VPF8|  
TM104\_DROME Transmembrane protein 104 homolog OS=Drosophila  
melanogaster GN=CG5262 PE=2 SV=2|e=2.573E-149|from=442|to=1860|

frame=-1|Fragment\_4  
MSRMPRFYEIDHQVELGEMASFFNTAGRSVFYLCLCIYLYGDLSIYCAAVSESLVDITC  
>Locus\_6731\_Transcript\_2/3\_Confidence\_0.667\_Length\_2064|. |sp|Q9VPF8|  
TM104\_DROME Transmembrane protein 104 homolog OS=Drosophila  
melanogaster GN=CG5262 PE=2 SV=2|e=2.573E-149|from=442|to=1860|  
frame=-1|Fragment\_5  
YIPANNTNNTILPCFPSEENSISRITVYNLCLSAFFCLMGPF AFFNVQKTKYLQMIT SFL  
RWLAFSIMIGIASWRLATQGPQSQPSVAQVSGVPGLFGACVYSFMCHHSIPSLVAPIR NK  
SSLKLLSCDYFLICVFYIVLAVTGTFAFANLEDLYTLNFLPSPD  
>Locus\_6731\_Transcript\_2/3\_Confidence\_0.667\_Length\_2064|. |sp|Q9VPF8|  
TM104\_DROME Transmembrane protein 104 homolog OS=Drosophila  
melanogaster GN=CG5262 PE=2 SV=2|e=2.573E-149|from=442|to=1860|  
frame=-1|Fragment\_6  
SVMMLAHYFLALFPVFTLSASFPIIAITLRNNLQTLFLDNSRIESYNFFVRKMCFP LLA  
IVPPFLVAIGARSLSGLVGFTGSYAGTGVQYLVIPLVYSARRQCNTIPALRHENQFKSP  
FKSNLWLI FILLWSIACVVLVSVNLFA  
>Locus\_6731\_Transcript\_1/3\_Confidence\_0.667\_Length\_1984|. |sp|Q9VPF8|  
TM104\_DROME Transmembrane protein 104 homolog OS=Drosophila  
melanogaster GN=CG5262 PE=2 SV=2|e=1.1003E-149|from=362|to=1780|  
frame=-1|Fragment\_1  
YSSWMGLVYVFNLI VGTGALTLPVAFARAGWGLGLAAIIVLAFISFVTVTFVIETMSCAN  
ALMHWKRLG LLLKREKCITD  
>Locus\_6731\_Transcript\_1/3\_Confidence\_0.667\_Length\_1984|. |sp|Q9VPF8|  
TM104\_DROME Transmembrane protein 104 homolog OS=Drosophila  
melanogaster GN=CG5262 PE=2 SV=2|e=1.1003E-149|from=362|to=1780|  
frame=-1|Fragment\_2  
EDCADEIS  
>Locus\_6731\_Transcript\_1/3\_Confidence\_0.667\_Length\_1984|. |sp|Q9VPF8|  
TM104\_DROME Transmembrane protein 104 homolog OS=Drosophila  
melanogaster GN=CG5262 PE=2 SV=2|e=1.1003E-149|from=362|to=1780|  
frame=-1|Fragment\_3  
EDSFEIDNLERHPL  
>Locus\_6731\_Transcript\_1/3\_Confidence\_0.667\_Length\_1984|. |sp|Q9VPF8|  
TM104\_DROME Transmembrane protein 104 homolog OS=Drosophila  
melanogaster GN=CG5262 PE=2 SV=2|e=1.1003E-149|from=362|to=1780|  
frame=-1|Fragment\_4  
MSRMPRFYEIDHQVELGEMASFFNTAGRSVFYLCLCIYLYGDLSIYCAAVSESLVDITC  
>Locus\_6731\_Transcript\_1/3\_Confidence\_0.667\_Length\_1984|. |sp|Q9VPF8|  
TM104\_DROME Transmembrane protein 104 homolog OS=Drosophila  
melanogaster GN=CG5262 PE=2 SV=2|e=1.1003E-149|from=362|to=1780|  
frame=-1|Fragment\_5  
YIPANNTNNTILPCFPSEENSISRITVYNLCLSAFFCLMGPF AFFNVQKTKYLQMIT SFL  
RWLAFSIMIGIASWRLATQGPQSQPSVAQVSGVPGLFGACVYSFMCHHSIPSLVAPIR NK  
SSLKLLSCDYFLICVFYIVLAVTGTFAFANLEDLYTLNFLPSPD  
>Locus\_6731\_Transcript\_1/3\_Confidence\_0.667\_Length\_1984|. |sp|Q9VPF8|  
TM104\_DROME Transmembrane protein 104 homolog OS=Drosophila  
melanogaster GN=CG5262 PE=2 SV=2|e=1.1003E-149|from=362|to=1780|  
frame=-1|Fragment\_6  
SVMMLAHYFLALFPVFTLSASFPIIAITLRNNLQTLFLDNSRIESYNFFVRKMCFP LLA  
IVPPFLVAIGARSLSGLVGFTGSYAGTGVQYLVIPLVYSARRQCNTIPALRHENQFKSP  
FKSNLWLI FILLWSIACVVLVSVNLFA  
>Locus\_1834\_Transcript\_6/13\_Confidence\_0.583\_Length\_4374|UNIGENE  
REPRESENTATIVE TRANSCRIPT|sp|Q9VQH2|DUOX\_DROME Dual oxidase  
OS=Drosophila melanogaster GN=Duox PE=1 SV=2|e=0|from=677|to=4372|

frame=2|Fragment\_1  
LFVGLLTYCSCLGS  
>Locus\_1834\_Transcript\_6/13\_Confidence\_0.583\_Length\_4374|UNIGENE  
REPRESENTATIVE TRANSCRIPT|sp|Q9VQH2|DUOX\_DROME Dual oxidase  
OS=Drosophila melanogaster GN=Duox PE=1 SV=2|e=0|from=677|to=4372|

frame=2|Fragment\_2  
EKILSNTEKQRYDGYNNLAHPDWGSGVSHLTRKTPPAYADGVYALAGQGRPSRRLSRL  
FMKGQDGLASKMNRALLAFFGQVVTSEIVMASESGCPIEMHRIEIDRCDEMYDPECRGD  
RYIPFHRAAYDRRTGMSPNMPREQINQMTSWIDGSFIYSSSEPWLNAMRSFHNGTLLGEE  
TSHGTMPIRNTMRVPLFNNPVPHVMRMLSPERLFLLDGPRSNQNPALLAFGILFFRWHNV  
IAGRVQRQHPTWPDEEVFQRARRIVVASLQNIAYEYLP AFLGEELPEYTGYPDPVHPGV  
SHVFQSAAFRFGHTMIPPGMYRRDGKCNKRTAAGHQAIRLCATWWSNDV  
>Locus\_1834\_Transcript\_6/13\_Confidence\_0.583\_Length\_4374|UNIGENE  
REPRESENTATIVE TRANSCRIPT|sp|Q9VQH2|DUOX\_DROME Dual oxidase  
OS=Drosophila melanogaster GN=Duox PE=1 SV=2|e=0|from=677|to=4372|

frame=2|Fragment\_3  
GMASQIAEREDSLLCSDVRDKLFGPMEFTRRDLGALNIMRGRDNGLPDYNTARSYFRLPK  
VNDWTEINPELFAARPELLGLLVAAYNNRLDNVDVYVGGMLESDGKPGELFTAVIREQFV  
RIRDADRFWFENE  
>Locus\_1834\_Transcript\_6/13\_Confidence\_0.583\_Length\_4374|UNIGENE  
REPRESENTATIVE TRANSCRIPT|sp|Q9VQH2|DUOX\_DROME Dual oxidase  
OS=Drosophila melanogaster GN=Duox PE=1 SV=2|e=0|from=677|to=4372|

frame=2|Fragment\_4  
NGIFTKEEIEDIKKITLWDIIVNSTSIEPHEIQKDVFRFAEGDPCPQPAQLNASLLEPCK  
YLRGYDYFEGSELAYIYVCVLLGFVPILCAAAGYGV

>Locus\_1834\_Transcript\_6/13\_Confidence\_0.583\_Length\_4374|UNIGENE  
REPRESENTATIVE TRANSCRIPT|sp|Q9VQH2|DUOX\_DROME Dual oxidase  
OS=Drosophila melanogaster GN=Duox PE=1 SV=2|e=0|from=677|to=4372|

frame=2|Fragment\_5  
EALKSKAEGKGGSDVMIVREWLHANHKRLVKVRFGEAALHTVDRKGEKLRVTSFKNVD  
SVTIEESQDNYHNKPLLLMRIPRDHDLVLELDSLGSRRKFVSKLESFLLSHKKHLICIQ  
QMRDMILAKAETRERRQKLEHFFREAYALTFGLRP

>Locus\_1834\_Transcript\_6/13\_Confidence\_0.583\_Length\_4374|UNIGENE  
REPRESENTATIVE TRANSCRIPT|sp|Q9VQH2|DUOX\_DROME Dual oxidase  
OS=Drosophila melanogaster GN=Duox PE=1 SV=2|e=0|from=677|to=4372|

frame=2|Fragment\_6  
VVTVMRTSLSKGEFASALGMKSDAVFVRKMFNIVDKDGDGRISFQEFLDTVVLF SRGKTE  
DKLRIIFDMCDNDRNGVIDKGELSEMLRSLVEIARTTSLSDDQVTELIDGMFQDAGLEHK  
DSLTYVDFKQMMKEYKGFVAIGLDCKGAKQNFLDTSTNVARMTSFHIEPAMEKRRPYLL  
RQWDCLTLLLEENRQNIIFYLFIFYVITIALFVERFIHYSFMAEHTDLRHIMGVIGIAITRG  
SAASLSFCYSLLLL TMSRNLITKQFAVQQYIPLDSHVQFHKIAACTALFFSLLHTVGH  
IVNFYHVSTQPEHLKCMTREHVFTSDYKPDISFWMFQTITGVTGVMFITMCIIFVFAH  
PTIRKKAYSFWRAHSYVLLYALCLVHGLARLTGAPRFFLFFIGPGIYALDKIVTLRT  
KYMALDVIETELLPSDVI

>Locus\_1834\_Transcript\_7/13\_Confidence\_0.583\_Length\_4374|. |sp|  
Q9VQH2|DUOX\_DROME Dual oxidase OS=Drosophila melanogaster GN=Duox  
PE=1 SV=2|e=0|from=677|to=4372|frame=2|Fragment\_1  
LFVGLLTYCSCLGS

>Locus\_1834\_Transcript\_7/13\_Confidence\_0.583\_Length\_4374|. |sp|  
Q9VQH2|DUOX\_DROME Dual oxidase OS=Drosophila melanogaster GN=Duox  
PE=1 SV=2|e=0|from=677|to=4372|frame=2|Fragment\_2

EKILSNTEKQRYDGYNNLAHPDWGSGVSHLTRKTPPAYADGVYALAGQGRPSRRLSRL  
FMKGQDGLASKMNRALLAFFGQVVTSEIVMASESGCPIEMHRIEIDRCDEMYDPECRGD  
RYIPFHRAAYDRRTGMSPNMPREQINQMTSWIDGSFIYSSSEPWLNAMRSFHNGTLLGEE

TSHGTMPIRNTMRVPLFNNPVPVHVMRMLSPERLFLLDGPRSNQNPALLAFGILFFRWHNV  
IAGRVQRQHPTWPDEEVFQRRARRIVVASLQNIAYEYLP AFLGEELPEYTGYPDVHPGV  
SHVFQSAAFRFGHTMIPPGMYRRDGKCNKRTAAGHQAIRLCATWWSNDV  
>Locus\_1834\_Transcript\_7/13\_Confidence\_0.583\_Length\_4374|. |sp|  
Q9VQH2|DUOX\_DROME Dual oxidase OS=Drosophila melanogaster GN=DuoX  
PE=1 SV=2|e=0|from=677|to=4372|frame=2|Fragment\_3  
GMASQIAEREDSLLCSDVRDKLFGPMEFTRRDLGALNIMRGRDNGLPDYNTARSYFRLPK  
VNDWTEINPELFAARPELLGLLVAAYNNRLDNVDVYVGGMLES DGKPGELFTAVIREQFV  
RIRDADRWFENE

>Locus\_1834\_Transcript\_7/13\_Confidence\_0.583\_Length\_4374|. |sp|  
Q9VQH2|DUOX\_DROME Dual oxidase OS=Drosophila melanogaster GN=DuoX  
PE=1 SV=2|e=0|from=677|to=4372|frame=2|Fragment\_4  
NGIFTKEEIEDIKKITLWDIIVNSTSIEPHEIQKDVFRFAEGDPCPQPAQLNASLLEPCK  
YLRGYDYFEGSELAYIYVCVLLGFVPI LCAAAGYGV

>Locus\_1834\_Transcript\_7/13\_Confidence\_0.583\_Length\_4374|. |sp|  
Q9VQH2|DUOX\_DROME Dual oxidase OS=Drosophila melanogaster GN=DuoX  
PE=1 SV=2|e=0|from=677|to=4372|frame=2|Fragment\_5  
EALKSKAEGKGGSDKMI VREWLHANHKRLVKVRF GPEAALHTVDRKGEKLRTVSFKNVD  
SVTIEESQDNYHNKPLLLMRIPRDHDLVLELDSLGSRRKFVSKLESFLLSHKKHLICIQ  
QMRDMILAKAETRERRQKLEHFFREAYALTFGLRP

>Locus\_1834\_Transcript\_7/13\_Confidence\_0.583\_Length\_4374|. |sp|  
Q9VQH2|DUOX\_DROME Dual oxidase OS=Drosophila melanogaster GN=DuoX  
PE=1 SV=2|e=0|from=677|to=4372|frame=2|Fragment\_6  
VVTVMRTSLSKGEFASALGMKSDAVFVRKMFNIVDKDGDGRISFQEF LDTVVLFSRGKTE  
DKLRIIFDMCDNDRNGVIDKGELSEMLRSLVEIARTTSLSDDQVTE LIDGMFQDAGLEHK  
DSLTYVDFKQMMKEYKGFVAIGLDCKGAKQNFLDTSTNVARMTSFHIEPAMEKRRPYLL  
RQWDCLTLLLEENRQNI FYLFIFYVITIALFVERFIHYSFMAEHTDLRHIMGVGIAITRG  
SAASLSFCYSLLLL TMSRNLITK LKQFAVQQYIPLDSHVQFHKIAACTALFFSLLHTVGH  
IVNFYHVSTQPV EHLKCM TREVVHFTSDYKPDISFWMFQTITGVTGVMLFITMCII FVFAH  
PTIRKKAYSFWRAHSLYVLLYALCLVHGLARLTGAPRFW LFFIGPGI IYALDKIVTLRT  
KYMALDVIETELLPSDVI

>Locus\_1834\_Transcript\_8/13\_Confidence\_0.528\_Length\_4374|. |sp|  
Q9VQH2|DUOX\_DROME Dual oxidase OS=Drosophila melanogaster GN=DuoX  
PE=1 SV=2|e=0|from=677|to=4372|frame=2|Fragment\_1  
LFVGLLTYCCLGS

>Locus\_1834\_Transcript\_8/13\_Confidence\_0.528\_Length\_4374|. |sp|  
Q9VQH2|DUOX\_DROME Dual oxidase OS=Drosophila melanogaster GN=DuoX  
PE=1 SV=2|e=0|from=677|to=4372|frame=2|Fragment\_2  
EKILSNTEKQRYDGWYNNLAHPDWGSV GSHLTRKTPPAYADGVYALAGQGRPSRRLSRL  
FMKGQDGLASKMNR TALLAFFGQVVTSEIVMAS ESGCPIEMHRIEIDRCDEMYDPECRGD  
RYIPFHRAAYDRRTGMSPNMPREQINQMTSWIDGSFIYSSSEPWLNAMRSFHNGTLLGEE  
TSHGTMPIRNTMRVPLFNNPVPVHVMRMLSPERLFLLDGPRSNQNPALLAFGILFFRWHNV  
IAGRVQRQHPTWPDEEVFQRRARRIVVASLQNIAYEYLP AFLGEELPEYTGYPDVHPGV  
SHVFQSAAFRFGHTMIPPGMYRRDGKCNKRTAAGHQAIRLCATWWSNDV

>Locus\_1834\_Transcript\_8/13\_Confidence\_0.528\_Length\_4374|. |sp|  
Q9VQH2|DUOX\_DROME Dual oxidase OS=Drosophila melanogaster GN=DuoX  
PE=1 SV=2|e=0|from=677|to=4372|frame=2|Fragment\_3  
GMASQIAEREDSLLCSDVRDKLFGPMEFTRRDLGALNIMRGRDNGLPDYNTARSYFRLPK  
VNDWTEINPELFAARPELLGLLVAAYNNRLDNVDVYVGGMLES DGKPGELFTAVIREQFV  
RIRDADRWFENE

>Locus\_1834\_Transcript\_8/13\_Confidence\_0.528\_Length\_4374|. |sp|  
Q9VQH2|DUOX\_DROME Dual oxidase OS=Drosophila melanogaster GN=DuoX  
PE=1 SV=2|e=0|from=677|to=4372|frame=2|Fragment\_4  
NGIFTKEEIEDIKKITLWDIIVNSTSIEPHEIQKDVFRFAEGDPCPQPAQLNASLLEPCK

YLRGYDYFEGSELAYIYVCVLLGFVPILCAAAGYGV

>Locus\_1834\_Transcript\_8/13\_Confidence\_0.528\_Length\_4374|. |sp|  
Q9VQH2|DUOX\_DROME Dual oxidase OS=Drosophila melanogaster GN=Duox  
PE=1 SV=2|e=0|from=677|to=4372|frame=2|Fragment\_5  
EALKSKAEGKGGSDVMIVREWLHANHKRLVKVRFGEAALHTVDRKGEKLRTVSFKNVD  
SVTIEESQDNYHNKKPLLLMRIPRDHDLVLELDSLGSRRKFVSKLESFLLSHKKHLICIQ  
QMRDMILAKAETRERRQKLEHFFREAYALTFGLRP

>Locus\_1834\_Transcript\_8/13\_Confidence\_0.528\_Length\_4374|. |sp|  
Q9VQH2|DUOX\_DROME Dual oxidase OS=Drosophila melanogaster GN=Duox  
PE=1 SV=2|e=0|from=677|to=4372|frame=2|Fragment\_6  
VVTVMRTSLSKGEFASALGMKSDAVFVRKMFNIVDKDGDGRISFQEFLDTVVLF SRGKTE  
DKLRIIFDMCDNDRNGVIDKGELSEMLRSLVEIARTTSLSDDQVTELDGMFQDAGLEHK  
DSLTYVDFKQMMKEYKGFVAIGLDCKGAKQNFLDTSTNVARMTSFHIEPAMEKRRPYLL  
RQWDCLTTLLEENRQNIIFYLFIFYVITIALFVERFIHYSFMAEHTDLRHIMGVGIATR  
SAASLSFCYSLLLLLTMSRNLITKQFAVQQYIPLDSHVQFHKIAACTALFFSLLHTVGH  
IVNFYHVSTQPEHLKCMTREHFTSDYKPDISFWMFQTITGVTGVMFITMCIIFVFAH  
PTIRKKAYSFWRAHSLYVLLYALCLVHGLARLTGAPRFLFFIGPGIYALDKIVTLRT  
KYMALDVIETELLPSDVI

>Locus\_1834\_Transcript\_9/13\_Confidence\_0.583\_Length\_4374|. |sp|  
Q9VQH2|DUOX\_DROME Dual oxidase OS=Drosophila melanogaster GN=Duox  
PE=1 SV=2|e=0|from=677|to=4372|frame=2|Fragment\_1  
LFVGLLTYCSCLGS

>Locus\_1834\_Transcript\_9/13\_Confidence\_0.583\_Length\_4374|. |sp|  
Q9VQH2|DUOX\_DROME Dual oxidase OS=Drosophila melanogaster GN=Duox  
PE=1 SV=2|e=0|from=677|to=4372|frame=2|Fragment\_2  
EKILSNTEKQRYDGWYNNLAHPDWGSGVSHLTRKTPPAYADGVYALAGQGRPSRRLSRL  
FMKGQDGLASKMNRALLAFFGQVVTSEIVMASSEGCPIEMHRIEIDRCDEMYDPECRGD  
RYIPFHRAAYDRRTGMSPNMPREQINQMTSWIDGSFIYSSSEPWLNAMRSFHNGTLLGEE  
TSHGTMPIRINTMRVPLFNNPVPVHVMRMLSPERLFLLDGPRSNQNPALLAFGILFFRWHNV  
IAGRVQRQHPTWPDEEVFQRARRIVVASLQNIAYEYLP AFLGEELPEYTGYPDPVHPGV  
SHVFQSAAFRFGHTMIPPGMYRRDGKCNKRTAAGHQAIRLCATWWSNDV

>Locus\_1834\_Transcript\_9/13\_Confidence\_0.583\_Length\_4374|. |sp|  
Q9VQH2|DUOX\_DROME Dual oxidase OS=Drosophila melanogaster GN=Duox  
PE=1 SV=2|e=0|from=677|to=4372|frame=2|Fragment\_3  
GMASQIAEREDSLLCSDVRDKLFGPMEFTRRD LGALNIMRGRDNGLPDYNTARSYFRLPK  
VNDWTEINPELFAARPELLGLLVAAYNNRLDNVDVYVGGMLES DGKPGELFTAVIREQFV  
RIRDADRWFENE

>Locus\_1834\_Transcript\_9/13\_Confidence\_0.583\_Length\_4374|. |sp|  
Q9VQH2|DUOX\_DROME Dual oxidase OS=Drosophila melanogaster GN=Duox  
PE=1 SV=2|e=0|from=677|to=4372|frame=2|Fragment\_4  
NGIFTKEEIEDIKKITLWDIIVNSTSIEPHEIQKDVFRFAEGDPCPQPAQLNASLLEPCK  
YLRGYDYFEGSELAYIYVCVLLGFVPILCAAAGYGV

>Locus\_1834\_Transcript\_9/13\_Confidence\_0.583\_Length\_4374|. |sp|  
Q9VQH2|DUOX\_DROME Dual oxidase OS=Drosophila melanogaster GN=Duox  
PE=1 SV=2|e=0|from=677|to=4372|frame=2|Fragment\_5  
EALKSKAEGKGGSDVMIVREWLHANHKRLVKVRFGEAALHTVDRKGEKLRTVSFKNVD  
SVTIEESQDNYHNKKPLLLMRIPRDHDLVLELDSLGSRRKFVSKLESFLLSHKKHLICIQ  
QMRDMILAKAETRERRQKLEHFFREAYALTFGLRP

>Locus\_1834\_Transcript\_9/13\_Confidence\_0.583\_Length\_4374|. |sp|  
Q9VQH2|DUOX\_DROME Dual oxidase OS=Drosophila melanogaster GN=Duox  
PE=1 SV=2|e=0|from=677|to=4372|frame=2|Fragment\_6  
VVTVMRTSLSKGEFASALGMKSDAVFVRKMFNIVDKDGDGRISFQEFLDTVVLF SRGKTE  
DKLRIIFDMCDNDRNGVIDKGELSEMLRSLVEIARTTSLSDDQVTELDGMFQDAGLEHK  
DSLTYVDFKQMMKEYKGFVAIGLDCKGAKQNFLDTSTNVARMTSFHIEPAMEKRRPYLL

RQWDCLTTLLEENRQNI FYLFIFYVITIALFVERFIHYSFMAEHTDLRHIMGVGIATRGS  
SAASLSFCYSLLLLLTMSRNLITKQFAVQQYIPLDSHVQFHKIAACTALFFSLLHTVGH  
IVNFYHVSTQPVEHLKCMTREVFHFTSDYKPDISFWMFQTITGVTGVMLFITMCIIFVFAH  
PTIRKKAYSFWRAHSLYVLLYALCLVHGLARLTGAPRFLFFIGPGIIYALDKIVTLRT  
KYMALDVIETELLPSDVI

>Locus\_1834\_Transcript\_10/13\_Confidence\_0.583\_Length\_4374|. |sp|  
Q9VQH2|DUOX\_DROME Dual oxidase OS=Drosophila melanogaster GN=Duox  
PE=1 SV=2|e=0|from=677|to=4372|frame=2|Fragment\_1  
LFVGLLTYCSCLGS

>Locus\_1834\_Transcript\_10/13\_Confidence\_0.583\_Length\_4374|. |sp|  
Q9VQH2|DUOX\_DROME Dual oxidase OS=Drosophila melanogaster GN=Duox  
PE=1 SV=2|e=0|from=677|to=4372|frame=2|Fragment\_2  
EKILSNTEKQRYDGYNNLAHPDWGSGVSHLTRKTPPAYADGVYALAGQGRPSRRLSRL  
FMKGQDGLASKMNRALLAFFGQVVTSEIVMASESGCPIEMHRIEIDRCDEMYDPECRGD  
RYIPFHRAAYDRRTGMSPNMPREQINQMTSWIDGSFIYSSSEPWLNAMRSFHNGTLLGEE  
TSHGTMPIRNTMRVPLFNNPVPVHMRMLSPERLFLLDGPRSNQNPALLAFGILFFRWHNV  
IAGRVQRQHPTWPDEEVFQARRIVVASLQNI IAYEYLP AFLGEELPEYTGYPDPVHPGV  
SHVFQSAAFRFGHTMIPPGMYRRDGKCNKRTAAGHQAIRLCATWWSNDV

>Locus\_1834\_Transcript\_10/13\_Confidence\_0.583\_Length\_4374|. |sp|  
Q9VQH2|DUOX\_DROME Dual oxidase OS=Drosophila melanogaster GN=Duox  
PE=1 SV=2|e=0|from=677|to=4372|frame=2|Fragment\_3  
GMASQIAEREDSLLCSDVRDKLFGPMEFTRRDLGALNIMRGRDNGLPDYNTARSYFRLPK  
VNDWTEINPELFAARPELLGLLVAAYNNRLDNVDVYVGGMLESDGKPGELFTAVIREQFV  
RIRDADRWFENE

>Locus\_1834\_Transcript\_10/13\_Confidence\_0.583\_Length\_4374|. |sp|  
Q9VQH2|DUOX\_DROME Dual oxidase OS=Drosophila melanogaster GN=Duox  
PE=1 SV=2|e=0|from=677|to=4372|frame=2|Fragment\_4  
NGIFTKEEIEDIKITLWDIIVNSTSIEPHEIQKDVFRFAEGDPCQPAQLNASLLEPCK  
YLRGYDYFEGSELAYIYVCVLLGFVPI LCAAAGYGV

>Locus\_1834\_Transcript\_10/13\_Confidence\_0.583\_Length\_4374|. |sp|  
Q9VQH2|DUOX\_DROME Dual oxidase OS=Drosophila melanogaster GN=Duox  
PE=1 SV=2|e=0|from=677|to=4372|frame=2|Fragment\_5  
EALKSKAEGKGSVDKMI VREWLHANHKRLVKVRFGEAALHTVDRKGEKLRTVSFKNVD  
SVTIEESQDNYHNKPLLLMRIPRDHDLVLELDSLGSRRKFVSKLESFLLSHKKHLICIQ  
QMRDMILAKAETRERRQKLEHFFREAYALTFGLRP

>Locus\_1834\_Transcript\_10/13\_Confidence\_0.583\_Length\_4374|. |sp|  
Q9VQH2|DUOX\_DROME Dual oxidase OS=Drosophila melanogaster GN=Duox  
PE=1 SV=2|e=0|from=677|to=4372|frame=2|Fragment\_6  
VVTVMRTSLSKGEFASALGMKSDAVFVRKMFNIVDKDGDGRISFQEFLDTVVLF SRGKTE  
DKLRIIFDMCDNDRNGVIDKGELSEMLRSLVEIARTTSLSDDQVTE LIDGMFQDAGLEHK  
DSLTYVDFKQMMKEYKGFVAIGLDCKGAKQNFLDTSTNVARMTSFHIEPAMEKRRPYLL  
RQWDCLTTLLEENRQNI FYLFIFYVITIALFVERFIHYSFMAEHTDLRHIMGVGIATRGS  
SAASLSFCYSLLLLLTMSRNLITKQFAVQQYIPLDSHVQFHKIAACTALFFSLLHTVGH  
IVNFYHVSTQPVEHLKCMTREVFHFTSDYKPDISFWMFQTITGVTGVMLFITMCIIFVFAH  
PTIRKKAYSFWRAHSLYVLLYALCLVHGLARLTGAPRFLFFIGPGIIYALDKIVTLRT  
KYMALDVIETELLPSDVI

>Locus\_1834\_Transcript\_11/13\_Confidence\_0.556\_Length\_4374|. |sp|  
Q9VQH2|DUOX\_DROME Dual oxidase OS=Drosophila melanogaster GN=Duox  
PE=1 SV=2|e=0|from=677|to=4372|frame=2|Fragment\_1  
LFVGLLTYCSCLGS

>Locus\_1834\_Transcript\_11/13\_Confidence\_0.556\_Length\_4374|. |sp|  
Q9VQH2|DUOX\_DROME Dual oxidase OS=Drosophila melanogaster GN=Duox  
PE=1 SV=2|e=0|from=677|to=4372|frame=2|Fragment\_2  
EKILSNTEKQRYDGYNNLAHPDWGSGVSHLTRKTPPAYADGVYALAGQGRPSRRLSRL

FMKGQDGLASKMNRRTALLAFFGQVVTSEIVMASESGCPIEMHRIEIDRCDEMYDPECRGD  
RYIPFHRAAYDRRTGMSPNMPREQINQMTSWIDGSFIYSSSEPWLNAMRSFHNGTLLGEE  
TSHGTMPIRNTMRVPLFNNPVPHVMRMLSPERLFLGDPNSQNPALLAFGILFFRWHNV  
IAGRVQRQHPTWPDEEVFQRARRIVVASLQNIAYEYLP AFLGEELPEYTGYPDPVHPGV  
SHVFQSAAFRFGHTMIPPGMYRRDGKCNKRRTAAGHQAIRLCATWWSNDV  
>Locus\_1834\_Transcript\_11/13\_Confidence\_0.556\_Length\_4374|. |sp|  
Q9VQH2|DUOX\_DROME Dual oxidase OS=Drosophila melanogaster GN=Duox  
PE=1 SV=2|e=0|from=677|to=4372|frame=2|Fragment\_3  
GMASQIAEREDSLLCSDVRDKLFGPMEFTRRD LGALNIMRGRDNGLPDYNTARSYFRLPK  
VNDWTEINPELFAARPELLG LLVAAYNNRLDNVDVYVGGMLES DGKPGELFTAVIREQFV  
RIRDADRWFENE  
>Locus\_1834\_Transcript\_11/13\_Confidence\_0.556\_Length\_4374|. |sp|  
Q9VQH2|DUOX\_DROME Dual oxidase OS=Drosophila melanogaster GN=Duox  
PE=1 SV=2|e=0|from=677|to=4372|frame=2|Fragment\_4  
NGIFTKEEIEDIKKITLWDIIVNSTSIEPHEIQKDVFRFAEGDPCPQPAQLNASLLEPCK  
YLRGYDYFEGSELAYIYVCVLLGFVPILCAAAGYGV  
>Locus\_1834\_Transcript\_11/13\_Confidence\_0.556\_Length\_4374|. |sp|  
Q9VQH2|DUOX\_DROME Dual oxidase OS=Drosophila melanogaster GN=Duox  
PE=1 SV=2|e=0|from=677|to=4372|frame=2|Fragment\_5  
EALKSKAEGKGGSDKMIWREWLHANHKRLVKVRFGEAALHTVDRKGEKLRVTSFKNVD  
SVTIEESQDNYHNKPLLLMRIPRDHDLVLELDSLGSRRKRVSKLESFLLSHKKHLICIQ  
QMRDMILAKAETRERRQKLEHFFREAYALTFGLRP  
>Locus\_1834\_Transcript\_11/13\_Confidence\_0.556\_Length\_4374|. |sp|  
Q9VQH2|DUOX\_DROME Dual oxidase OS=Drosophila melanogaster GN=Duox  
PE=1 SV=2|e=0|from=677|to=4372|frame=2|Fragment\_6  
VVTVMRTSLSKGEFASALGMKSDAVFVRKMFNIVDKDGDGRISFQEFLDTVVLF SRGKTE  
DKLRIIFDMCDNDRNGVIDKGELSEMLRSLVEIARTTSLSDDQVTELDGMFQDAGLEHK  
DSLTYVDFKQMMKEYKGFVAIGLDCKGAKQNFLDTSTNVARMTSFHIEPAMEKRRPYLL  
RQWDCLTLLLEENRQNI FYLFIFYVITIALFVERFIHYSFMAEHTDLRHIMGVGIATR  
SAASLSFCYSLLLL TMSRNLITK LKQFAVQYIPLDSHVQFHKIAACTALFFSLLHTVGH  
IVNFYHVSTQPV EHLKCM TREVHFTSDYKPDISFWMFQTITGVTGVMFITMCIIFVFAH  
PTIRKKAYSFWRAHSLYVLLYALCLVHGLARLTGAPRFFLFFIGPGIYALDKIVTLRT  
KYMALDVIETELLPSDVI  
>Locus\_1834\_Transcript\_13/13\_Confidence\_0.583\_Length\_4374|. |sp|  
Q9VQH2|DUOX\_DROME Dual oxidase OS=Drosophila melanogaster GN=Duox  
PE=1 SV=2|e=0|from=677|to=4372|frame=2|Fragment\_1  
LFVGLLTYCCLGS  
>Locus\_1834\_Transcript\_13/13\_Confidence\_0.583\_Length\_4374|. |sp|  
Q9VQH2|DUOX\_DROME Dual oxidase OS=Drosophila melanogaster GN=Duox  
PE=1 SV=2|e=0|from=677|to=4372|frame=2|Fragment\_2  
EKILSNTEKQRYDGWYNNLAHPDWGSGVSHLTRKTPPAYADGVYALAGQGRPSRRLSRL  
FMKGQDGLASKMNRRTALLAFFGQVVTSEIVMASESGCPIEMHRIEIDRCDEMYDPECRGD  
RYIPFHRAAYDRRTGMSPNMPREQINQMTSWIDGSFIYSSSEPWLNAMRSFHNGTLLGEE  
TSHGTMPIRNTMRVPLFNNPVPHVMRMLSPERLFLGDPNSQNPALLAFGILFFRWHNV  
IAGRVQRQHPTWPDEEVFQRARRIVVASLQNIAYEYLP AFLGEELPEYTGYPDPVHPGV  
SHVFQSAAFRFGHTMIPPGMYRRDGKCNKRRTAAGHQAIRLCATWWSNDV  
>Locus\_1834\_Transcript\_13/13\_Confidence\_0.583\_Length\_4374|. |sp|  
Q9VQH2|DUOX\_DROME Dual oxidase OS=Drosophila melanogaster GN=Duox  
PE=1 SV=2|e=0|from=677|to=4372|frame=2|Fragment\_3  
GMASQIAEREDSLLCSDVRDKLFGPMEFTRRD LGALNIMRGRDNGLPDYNTARSYFRLPK  
VNDWTEINPELFAARPELLG LLVAAYNNRLDNVDVYVGGMLES DGKPGELFTAVIREQFV  
RIRDADRWFENE  
>Locus\_1834\_Transcript\_13/13\_Confidence\_0.583\_Length\_4374|. |sp|  
Q9VQH2|DUOX\_DROME Dual oxidase OS=Drosophila melanogaster GN=Duox

PE=1 SV=2|e=0|from=677|to=4372|frame=2|Fragment\_4  
NGIFTKEEIEDIKKITLWDIIVNSTSIEPHEIQKDVFRFAEGDPCPQPAQLNASLLEPCK  
YLRGYDYFEGSELAYIYVCVLLGFVPILCAAAGYGV  
>Locus\_1834\_Transcript\_13/13\_Confidence\_0.583\_Length\_4374|. |sp|  
Q9VQH2|DUOX\_DROME Dual oxidase OS=Drosophila melanogaster GN=Duox  
PE=1 SV=2|e=0|from=677|to=4372|frame=2|Fragment\_5  
EALKSKAEGKGGSDKMIWREWLHANHKRLVKVRFGEAALHTVDRKGEKLRVTSFKNVD  
SVTIEESQDNYHNKKPLLLMRIPRDHDLVLELDSLGSRRKFVSKLESFLLSHKKHLICIQ  
QMRDMILAKAETRERRQKLEHFFREAYALTFGLRP  
>Locus\_1834\_Transcript\_13/13\_Confidence\_0.583\_Length\_4374|. |sp|  
Q9VQH2|DUOX\_DROME Dual oxidase OS=Drosophila melanogaster GN=Duox  
PE=1 SV=2|e=0|from=677|to=4372|frame=2|Fragment\_6  
VVTVMRTSLSKGEFASALGMKSDAVFVRKMFNIVDKDGDGRISFQEFLDTVVLF SRGKTE  
DKLRIIFDMCDNDRNGVIDKGELSEMLRSLVEIARTTSLSDDQVTELDGMFQDAGLEHK  
DSLTYVDFKQMMKEYKGFVAIGLDCKGAKQNFLDTSTNVARMTSFHIEPAMEKRRPYLL  
RQWDCLTTLLEENRQNI FYLFIFYVITIALFVERFIHYSFMAEHTDLRHIMGVGI AITRG  
SAASLSFCYSLLLL TMSRNLITK LKQFAVQQYIPLDSHVQFHKIAACTALFFSLLHTVGH  
IVNFYHVSTQPVHLKCM TREVHFTSDYKPDISFWMFQTITGVTGVMLFITMCIIFVFAH  
PTIRKKAYSFWRAHS LYVLLYALCLVHGLARLTGAPRFLFFIGPGI IYALDKIVTLRT  
KYMALDVIETELLPSDVI  
>Locus\_1834\_Transcript\_12/13\_Confidence\_0.278\_Length\_1991|. |sp|  
Q9VQH2|DUOX\_DROME Dual oxidase OS=Drosophila melanogaster GN=Duox  
PE=1 SV=2|e=0|from=1|to=1989|frame=1|Fragment\_1  
YLRGYDYFEGSELAYIYVCVLLGFVPILCAAAGYGV  
>Locus\_1834\_Transcript\_12/13\_Confidence\_0.278\_Length\_1991|. |sp|  
Q9VQH2|DUOX\_DROME Dual oxidase OS=Drosophila melanogaster GN=Duox  
PE=1 SV=2|e=0|from=1|to=1989|frame=1|Fragment\_2  
EALKSKAEGKGGSDKMIWREWLHANHKRLVKVRFGEAALHTVDRKGEKLRVTSFKNVD  
SVTIEESQDNYHNKKPLLLMRIPRDHDLVLELDSLGSRRKFVSKLESFLLSHKKHLICIQ  
QMRDMILAKAETRERRQKLEHFFREAYALTFGLRP  
>Locus\_1834\_Transcript\_12/13\_Confidence\_0.278\_Length\_1991|. |sp|  
Q9VQH2|DUOX\_DROME Dual oxidase OS=Drosophila melanogaster GN=Duox  
PE=1 SV=2|e=0|from=1|to=1989|frame=1|Fragment\_3  
VVTVMRTSLSKGEFASALGMKSDAVFVRKMFNIVDKDGDGRISFQEFLDTVVLF SRGKTE  
DKLRIIFDMCDNDRNGVIDKGELSEMLRSLVEIARTTSLSDDQVTELDGMFQDAGLEHK  
DSLTYVDFKQMMKEYKGFVAIGLDCKGAKQNFLDTSTNVARMTSFHIEPAMEKRRPYLL  
RQWDCLTTLLEENRQNI FYLFIFYVITIALFVERFIHYSFMAEHTDLRHIMGVGI AITRG  
SAASLSFCYSLLLL TMSRNLITK LKQFAVQQYIPLDSHVQFHKIAACTALFFSLLHTVGH  
IVNFYHVSTQPVHLKCM TREVHFTSDYKPDISFWMFQTITGVTGVMLFITMCIIFVFAH  
PTIRKKAYSFWRAHS LYVLLYALCLVHGLARLTGAPRFLFFIGPGI IYALDKIVTLRT  
KYMALDVIETELLPSDVI  
>Locus\_1834\_Transcript\_5/13\_Confidence\_0.139\_Length\_1409|. |sp|  
Q9VQH2|DUOX\_DROME Dual oxidase OS=Drosophila melanogaster GN=Duox  
PE=1 SV=2|e=1.0231E-111|from=677|to=1408|frame=2|Fragment\_1  
LFVGLLTYCCLGS  
>Locus\_1834\_Transcript\_5/13\_Confidence\_0.139\_Length\_1409|. |sp|  
Q9VQH2|DUOX\_DROME Dual oxidase OS=Drosophila melanogaster GN=Duox  
PE=1 SV=2|e=1.0231E-111|from=677|to=1408|frame=2|Fragment\_2  
EKILSNTEKQRYDGWYNNLAHPDWGSGVSHLTRKTPPAYADGVYALAGQGRPSRRLSRL  
FMKGQDGLASKMNR TALLAFFGQVVTSEIVMASSEGCPIEMHRIEIDRCDEMYDPECRGD  
RYIPFHRAAYDRRTGMSPNMPREQINQMTSWIDGSFIYSSSEPWLNAMRSFHNGTLLGEE  
TSHGTMPIRNTMRVPLFNNPVPHVMRMLSPERLFLLDGPRSNQNPALLAF  
>Locus\_14687\_Transcript\_1/2\_Confidence\_0.625\_Length\_578|. |sp|Q9VQH2|  
DUOX\_DROME Dual oxidase OS=Drosophila melanogaster GN=Duox PE=1

SV=2|e=1.5775E-109|from=1|to=576|frame=1|Fragment\_1  
GIIYALDKIVTLRRTKYMALDVIETELLPSDVIRIKFYRPPNLKYLSGQWVRVACTAFRSN  
EFHSFTLTSAPHENFLSCHIKAQGPWTWKL RNYFDPCNFNPEDQPKLRIEGPFGGGNQDW  
YKFEVAVMVG GIGVTPYASILNDLVFGTSTNRYSGVACKKVYFLWICPSHKHFEWFIDV  
LRDVEKKDVTNV  
>Locus\_14687\_Transcript\_2/2\_Confidence\_0.875\_Length\_578|. |sp|Q9VQH2|  
DUOX\_DROME Dual oxidase OS=Drosophila melanogaster GN=Duox PE=1  
SV=2|e=1.5775E-109|from=1|to=576|frame=1|Fragment\_1  
GIIYALDKIVTLRRTKYMALDVIETELLPSDVIRIKFYRPPNLKYLSGQWVRVACTAFRSN  
EFHSFTLTSAPHENFLSCHIKAQGPWTWKL RNYFDPCNFNPEDQPKLRIEGPFGGGNQDW  
YKFEVAVMVG GIGVTPYASILNDLVFGTSTNRYSGVACKKVYFLWICPSHKHFEWFIDV  
LRDVEKKDVTNV  
>Locus\_1834\_Transcript\_4/13\_Confidence\_0.056\_Length\_511|. |sp|Q9VQH2|  
DUOX\_DROME Dual oxidase OS=Drosophila melanogaster GN=Duox PE=1  
SV=2|e=1.55772E-80|from=1|to=510|frame=1|Fragment\_1  
FMKGQDGLASKMNR TALLAFFGQVVTSEIVMASSESGCIEMHRIEIDRCDEMYDPECRGD  
RYIPFHRAAYDRRTGMSPNMPREQINQMTSWIDGSFIYSSSEPWLNAMRSFHNGTLLGEE  
TSHGTMPIRNTMRVPLFNNPVPHVMRMLSPERL FLLGDPRSNQNPALLAF  
>Locus\_21100\_Transcript\_1/1\_Confidence\_1.000\_Length\_383|. |sp|Q9VQH2|  
DUOX\_DROME Dual oxidase OS=Drosophila melanogaster GN=Duox PE=1  
SV=2|e=3.107E-74|from=3|to=380|frame=-1|Fragment\_1  
NEFHSFTLTSAPHENFLSCHIKAQGPWTWKL RNYFDPCNFNPEDQPKLRIEGPFGGGNQD  
WYKFEVAVMVG GIGVTPYASILNDLVFGTSTNRYSGVACKKVYFLWICPSHKHFEWFID  
VLRDVE  
>Locus\_11826\_Transcript\_1/1\_Confidence\_1.000\_Length\_368|. |sp|Q9VQH2|  
DUOX\_DROME Dual oxidase OS=Drosophila melanogaster GN=Duox PE=1  
SV=2|e=1.32623E-72|from=3|to=368|frame=-1|Fragment\_1  
SFTLTSAPHENFLSCHIKAQGPWTWKL RNYFDPCNFNPEDQPKLRIEGPFGGGNQDWYKF  
EVAVMVG GIGVTPYASILNDLVFGTSTNRYSGVACKKVYFLWICPSHKHFEWFIDVLRD  
VE  
>Locus\_27287\_Transcript\_1/1\_Confidence\_1.000\_Length\_368|. |sp|Q9VQH2|  
DUOX\_DROME Dual oxidase OS=Drosophila melanogaster GN=Duox PE=1  
SV=2|e=2.68469E-57|from=1|to=366|frame=1|Fragment\_1  
CMTREHVHFTSDYKPDISFWMFQTITGVTGVMLFITMCIIFVFAHPTIRKKAYSFWRAHS  
LYVLLYALCLIHGLARLTGAPRFW LFFIGPGIIYALDKIVTLRRTKYMALDVIETELLPSD  
VI  
>Locus\_21056\_Transcript\_1/1\_Confidence\_1.000\_Length\_344|. |sp|Q9VQH2|  
DUOX\_DROME Dual oxidase OS=Drosophila melanogaster GN=Duox PE=1  
SV=2|e=4.39151E-52|from=3|to=341|frame=-1|Fragment\_1  
SDYKPDISFWMFQTITGVTGVMLFITMCIIFVFAHPTIRKKAYSFWRAHS LYVLLYALC  
LVHGLARLTGAPRFW LFFIGPGIIYALDKIVTLRRTKYMALDVIETELLPSDVI  
>Locus\_17924\_Transcript\_1/1\_Confidence\_1.000\_Length\_248|. |sp|Q9VQH2|  
DUOX\_DROME Dual oxidase OS=Drosophila melanogaster GN=Duox PE=1  
SV=2|e=4.49798E-44|from=1|to=246|frame=1|Fragment\_1  
KKVYFLWICPSHKHFEWFIDVLRDVEKKDVTNVLEIHFITQFFHKFDLRTTMLYICENH  
FQRLSKMSMFTGLKAVNHFGRP  
>Locus\_20864\_Transcript\_1/1\_Confidence\_1.000\_Length\_248|. |sp|Q9VQH2|  
DUOX\_DROME Dual oxidase OS=Drosophila melanogaster GN=Duox PE=1  
SV=2|e=4.49798E-44|from=1|to=246|frame=1|Fragment\_1  
KKVYFLWICPSHKHFEWFIDVLRDVEKKDVTNVLEIHFITQFFHKFDLRTTMLYICENH  
FQRLSKMSMFTGLKAVNHFGRP  
>Locus\_1834\_Transcript\_3/13\_Confidence\_1.000\_Length\_233|. |sp|Q9VQH2|  
DUOX\_DROME Dual oxidase OS=Drosophila melanogaster GN=Duox PE=1  
SV=2|e=1.05263E-21|from=31|to=231|frame=1|Fragment\_1

LFVGLLTYCSCLGS

>Locus\_1834\_Transcript\_3/13\_Confidence\_1.000\_Length\_233|. |sp|Q9VQH2|  
DUOX\_DROME Dual oxidase OS=Drosophila melanogaster GN=Duox PE=1  
SV=2|e=1.05263E-21|from=31|to=231|frame=1|Fragment\_2  
EKILSNTEKQRYDGWYNNLAHPDWGSGSHLTRKTPPAYADGVYALAGQGRPS

>Locus\_873\_Transcript\_1/2\_Confidence\_0.667\_Length\_1168|UNIGENE  
REPRESENTATIVE TRANSCRIPT|sp|Q9VRG7|CNEP1\_DROME CTD nuclear envelope  
phosphatase 1 homolog OS=Drosophila melanogaster GN=l(1)G0269 PE=2  
SV=1|e=9.7646E-107|from=152|to=796|frame=2|Fragment\_1  
KNILKWVQHQPVKYQLYPLSPISRHRLSIVKRKTLVLDLDELTIHSHHDAMQRSSVKPGT  
PPDFILKVTIDKHPVRFVHVKRPHVDFFLDIVSQWYDLVVFTASMEIYGAAVADKLDNGR  
GILRRRYRQHCTPDLGSYTKDLSAICADLNRVFIIDNSPGAYRGYPDNAIPIKSWFSDP  
MDTA

>Locus\_873\_Transcript\_1/2\_Confidence\_0.667\_Length\_1168|UNIGENE  
REPRESENTATIVE TRANSCRIPT|sp|Q9VRG7|CNEP1\_DROME CTD nuclear envelope  
phosphatase 1 homolog OS=Drosophila melanogaster GN=l(1)G0269 PE=2  
SV=1|e=9.7646E-107|from=152|to=796|frame=2|Fragment\_2  
RFTQDVRSVLSRNLHLHRLW

>Locus\_873\_Transcript\_1/2\_Confidence\_0.667\_Length\_1168|. |sp|Q9VRG7|  
CNEP1\_DROME CTD nuclear envelope phosphatase 1 homolog OS=Drosophila  
melanogaster GN=l(1)G0269 PE=2 SV=1|e=9.7646E-107|from=12|to=92|  
frame=3|Fragment\_1  
AFYVVASKVWTCLCFMFKKQVRAGLTY

>Locus\_873\_Transcript\_2/2\_Confidence\_0.667\_Length\_1132|. |sp|Q9VRG7|  
CNEP1\_DROME CTD nuclear envelope phosphatase 1 homolog OS=Drosophila  
melanogaster GN=l(1)G0269 PE=2 SV=1|e=6.98018E-97|from=2|to=760|  
frame=2|Fragment\_1  
QVRAWVQHQPVKYQLYPLSPISRHRNLFLPRKTLVLDLDELTVHAYVVVDHSTKSKSKIL  
RKKSPGIVKRKTLVLDLDELTIHSHHDAMQRSSVKPGTTPPDFILKVTIDKHPVRFVHVKR  
PHVDFFLDIVSQWYDLVVFTASMEIYGAAVADKLDNGRGILRRRYRQHCTPDLGSYTKD  
LSAICADLNRVFIIDNSPGAYRGYPDNAIPIKSWFSDPMDTA

>Locus\_873\_Transcript\_2/2\_Confidence\_0.667\_Length\_1132|. |sp|Q9VRG7|  
CNEP1\_DROME CTD nuclear envelope phosphatase 1 homolog OS=Drosophila  
melanogaster GN=l(1)G0269 PE=2 SV=1|e=6.98018E-97|from=2|to=760|  
frame=2|Fragment\_2  
RFTQDVRSVLSRNLHLHRLW

>Locus\_4883\_Transcript\_4/5\_Confidence\_0.692\_Length\_1710|UNIGENE  
REPRESENTATIVE TRANSCRIPT|sp|Q9VVT2|INDY1\_DROME Protein I'm not dead  
yet OS=Drosophila melanogaster GN=Indy PE=1 SV=2|e=3.4176E-128|  
from=377|to=1705|frame=2|Fragment\_1  
RPQHRGCCSKMLYFFKVYWRFSFVIVLAPIILLTPVFLVNNEPKFRCMYVVMLMSAYWVTEV  
LPLPVTAMLPMVLFPTMGILGTDRTCCMYMRETNVMFIGGLIIALAVEHCNLHKRLALKV  
ISIIIGCSHRRLNFGLVVVTMFVSMWISNTAAVAMMCPIMQAVLEELETQGLCEMYIKKKS  
TPESEERMLQSNEAT

>Locus\_4883\_Transcript\_4/5\_Confidence\_0.692\_Length\_1710|UNIGENE  
REPRESENTATIVE TRANSCRIPT|sp|Q9VVT2|INDY1\_DROME Protein I'm not dead  
yet OS=Drosophila melanogaster GN=Indy PE=1 SV=2|e=3.4176E-128|  
from=377|to=1705|frame=2|Fragment\_2  
DEPKRPSKTTLCYFMSAAYASTLGGVGSIVGSGTNLTFKGIYESRFPDA

>Locus\_4883\_Transcript\_4/5\_Confidence\_0.692\_Length\_1710|UNIGENE  
REPRESENTATIVE TRANSCRIPT|sp|Q9VVT2|INDY1\_DROME Protein I'm not dead  
yet OS=Drosophila melanogaster GN=Indy PE=1 SV=2|e=3.4176E-128|  
from=377|to=1705|frame=2|Fragment\_3  
PGIDFPKWMFYNVPGMLIFTFLTWVYLQWLYMGMFRPNVSVEAKQATLSKEGERVARSVIE

TKYKELGPMMSVHEKQVG

>Locus\_4883\_Transcript\_4/5\_Confidence\_0.692\_Length\_1710|UNIGENE REPRESENTATIVE TRANSCRIPT|sp|Q9VVT2|INDY1\_DROME Protein I'm not dead yet OS=Drosophila melanogaster GN=Indy PE=1 SV=2|e=3.4176E-128|from=377|to=1705|frame=2|Fragment\_4

RAPGFITGWAEAITDTKVKDATPAIFVVIILFMLPQNLDLFLKFCRSKKGKGEIEIPLPTK  
PAGALITWKYVLAKIPW

>Locus\_4883\_Transcript\_4/5\_Confidence\_0.692\_Length\_1710|UNIGENE REPRESENTATIVE TRANSCRIPT|sp|Q9VVT2|INDY1\_DROME Protein I'm not dead yet OS=Drosophila melanogaster GN=Indy PE=1 SV=2|e=3.4176E-128|from=377|to=1705|frame=2|Fragment\_5

EGSKESGMSEYLGQCLIGLK

>Locus\_5414\_Transcript\_1/3\_Confidence\_0.571\_Length\_658|. |sp|Q9VVT2|INDY1\_DROME Protein I'm not dead yet OS=Drosophila melanogaster GN=Indy PE=1 SV=2|e=7.56413E-40|from=37|to=459|frame=1|Fragment\_1

EGSKESGMSEYLGQ

>Locus\_5414\_Transcript\_1/3\_Confidence\_0.571\_Length\_658|. |sp|Q9VVT2|INDY1\_DROME Protein I'm not dead yet OS=Drosophila melanogaster GN=Indy PE=1 SV=2|e=7.56413E-40|from=37|to=459|frame=1|Fragment\_2

TAEFLTEFSSNVAIANIMLPVLAEMSVAIEMHPLYLMLPAALCCSMAFHMPVGTTPNAIA  
AGMCNISIGDMAKAGIGPSIVTLLVIWASFPTWGSVVYPELVTFPTWA

>Locus\_5414\_Transcript\_2/3\_Confidence\_0.571\_Length\_658|. |sp|Q9VVT2|INDY1\_DROME Protein I'm not dead yet OS=Drosophila melanogaster GN=Indy PE=1 SV=2|e=7.56413E-40|from=37|to=459|frame=1|Fragment\_1

EGSKESGMSEYLGQ

>Locus\_5414\_Transcript\_2/3\_Confidence\_0.571\_Length\_658|. |sp|Q9VVT2|INDY1\_DROME Protein I'm not dead yet OS=Drosophila melanogaster GN=Indy PE=1 SV=2|e=7.56413E-40|from=37|to=459|frame=1|Fragment\_2

TAEFLTEFSSNVAIANIMLPVLAEMSVAIEMHPLYLMLPAALCCSMAFHMPVGTTPNAIA  
AGMCNISIGDMAKAGIGPSIVTLLVIWASFPTWGSVVYPELVTFPTWA

>Locus\_5414\_Transcript\_3/3\_Confidence\_0.714\_Length\_658|. |sp|Q9VVT2|INDY1\_DROME Protein I'm not dead yet OS=Drosophila melanogaster GN=Indy PE=1 SV=2|e=7.56413E-40|from=37|to=459|frame=1|Fragment\_1

EGSKESGMSEYLGQ

>Locus\_5414\_Transcript\_3/3\_Confidence\_0.714\_Length\_658|. |sp|Q9VVT2|INDY1\_DROME Protein I'm not dead yet OS=Drosophila melanogaster GN=Indy PE=1 SV=2|e=7.56413E-40|from=37|to=459|frame=1|Fragment\_2

TAEFLTEFSSNVAIANIMLPVLAEMSVAIEMHPLYLMLPAALCCSMAFHMPVGTTPNAIA  
AGMCNISIGDMAKAGIGPSIVTLLVIWASFPTWGSVVYPELVTFPTWA

>Locus\_7301\_Transcript\_1/2\_Confidence\_0.800\_Length\_374|. |sp|Q9VVT2|INDY1\_DROME Protein I'm not dead yet OS=Drosophila melanogaster GN=Indy PE=1 SV=2|e=2.35889E-21|from=6|to=335|frame=-1|Fragment\_1

RAPGFITGWAEAITDTKVKDATPAIFVVIILFMLPQNLDLFLKFCRSKKGKGEIEIPLPTK  
PAGALITWKYVLAKIPW

>Locus\_7301\_Transcript\_1/2\_Confidence\_0.800\_Length\_374|. |sp|Q9VVT2|INDY1\_DROME Protein I'm not dead yet OS=Drosophila melanogaster GN=Indy PE=1 SV=2|e=2.35889E-21|from=6|to=335|frame=-1|Fragment\_2

AEGSKESGMSEYLGQCLIGLK

>Locus\_7301\_Transcript\_2/2\_Confidence\_0.800\_Length\_374|. |sp|Q9VVT2|INDY1\_DROME Protein I'm not dead yet OS=Drosophila melanogaster GN=Indy PE=1 SV=2|e=2.35889E-21|from=6|to=335|frame=-1|Fragment\_1

RAPGFITGWAEAITDTKVKDATPAIFVVIILFMLPQNLDLFLKFCRSKKGKGEIEIPLPTK  
PAGALITWKYVLAKIPW

>Locus\_7301\_Transcript\_2/2\_Confidence\_0.800\_Length\_374|. |sp|Q9VVT2|

INDY1\_DROME Protein I'm not dead yet OS=Drosophila melanogaster  
GN=Indy PE=1 SV=2|e=2.35889E-21|from=6|to=335|frame=-1|Fragment\_2  
AEGSKESGMSEYLGQCLIGLK  
>Locus\_11446\_Transcript\_1/1\_Confidence\_1.000\_Length\_380|UNIGENE  
REPRESENTATIVE TRANSCRIPT|sp|Q9VW12|U389\_DROME UPF0389 protein  
CG9231 OS=Drosophila melanogaster GN=CG9231 PE=1 SV=1|e=1.47157E-15|  
from=25|to=279|frame=1|Fragment\_1  
IKGATPSNFDKLLVYFKRYSSVEEIPKLVPHDTLHKVRGKARMYFATAFMVVTLLIGCYG  
MVKSGKHAAERGEFVQRQNIWHKQ  
>Locus\_14791\_Transcript\_1/2\_Confidence\_0.667\_Length\_592|UNIGENE  
REPRESENTATIVE TRANSCRIPT|sp|Q9VW60|ADCY2\_DROME Adenylate cyclase  
type 2 OS=Drosophila melanogaster GN=Ac76E PE=2 SV=3|e=2.30745E-26|  
from=80|to=448|frame=2|Fragment\_1  
SPSGLAVRSRPSSKMTKYVECWGADKPFANITDSSMAKNIGLASIAMIESNLEPSRM  
>Locus\_14791\_Transcript\_1/2\_Confidence\_0.667\_Length\_592|UNIGENE  
REPRESENTATIVE TRANSCRIPT|sp|Q9VW60|ADCY2\_DROME Adenylate cyclase  
type 2 OS=Drosophila melanogaster GN=Ac76E PE=2 SV=3|e=2.30745E-26|  
from=80|to=448|frame=2|Fragment\_2  
APRELKPCTLRVYRVERESMYATRRDDLFRRDVACAYGLFILMAAVLLL  
>Locus\_14791\_Transcript\_2/2\_Confidence\_0.667\_Length\_574|. |sp|Q9VW60|  
ADCY2\_DROME Adenylate cyclase type 2 OS=Drosophila melanogaster  
GN=Ac76E PE=2 SV=3|e=4.34613E-27|from=62|to=430|frame=2|Fragment\_1  
SYTGRLLRSRPSSKMTKYVECWGADKPFANITDSSMAKNIGLASIAMIESNLEPSRM  
>Locus\_14791\_Transcript\_2/2\_Confidence\_0.667\_Length\_574|. |sp|Q9VW60|  
ADCY2\_DROME Adenylate cyclase type 2 OS=Drosophila melanogaster  
GN=Ac76E PE=2 SV=3|e=4.34613E-27|from=62|to=430|frame=2|Fragment\_2  
APRELKPCTLRVYRVERESMYATRRDDLFRRDVACAYGLFILMAAVLLL  
>Locus\_16734\_Transcript\_1/1\_Confidence\_1.000\_Length\_505|. |sp|Q9VW60|  
ADCY2\_DROME Adenylate cyclase type 2 OS=Drosophila melanogaster  
GN=Ac76E PE=2 SV=3|e=2.62602E-16|from=79|to=504|frame=1|Fragment\_1  
GPADIVAASRFLRLAVFGLMTSLIACCAAIGLINF  
>Locus\_16734\_Transcript\_1/1\_Confidence\_1.000\_Length\_505|. |sp|Q9VW60|  
ADCY2\_DROME Adenylate cyclase type 2 OS=Drosophila melanogaster  
GN=Ac76E PE=2 SV=3|e=2.62602E-16|from=79|to=504|frame=1|Fragment\_2  
DNTIELVNNLNTTDIENNEWILTEMENFKNV  
>Locus\_16734\_Transcript\_1/1\_Confidence\_1.000\_Length\_505|. |sp|Q9VW60|  
ADCY2\_DROME Adenylate cyclase type 2 OS=Drosophila melanogaster  
GN=Ac76E PE=2 SV=3|e=2.62602E-16|from=79|to=504|frame=1|Fragment\_3  
PTYLHACAIISLTTVSVFLRSGFLLKLCVMIIIGLCQLAVIATSEFAQNYDGFYDTR  
>Locus\_16734\_Transcript\_1/1\_Confidence\_1.000\_Length\_505|. |sp|Q9VW60|  
ADCY2\_DROME Adenylate cyclase type 2 OS=Drosophila melanogaster  
GN=Ac76E PE=2 SV=3|e=2.62602E-16|from=79|to=504|frame=1|Fragment\_4  
VWLWALVMFIVLISILHTL  
>Locus\_2421\_Transcript\_1/1\_Confidence\_1.000\_Length\_2356|UNIGENE  
REPRESENTATIVE TRANSCRIPT|sp|Q9VXT2|DJC25\_DROME DnaJ homolog  
subfamily C member 25 homolog OS=Drosophila melanogaster GN=CG7872  
PE=2 SV=1|e=2.33342E-85|from=1521|to=2354|frame=-3|Fragment\_1  
QLARKFHPDLQKGEDKKAATEKFKAIATAYEILKDEEARSYDYMLDNPSE  
>Locus\_2421\_Transcript\_1/1\_Confidence\_1.000\_Length\_2356|UNIGENE  
REPRESENTATIVE TRANSCRIPT|sp|Q9VXT2|DJC25\_DROME DnaJ homolog  
subfamily C member 25 homolog OS=Drosophila melanogaster GN=CG7872  
PE=2 SV=1|e=2.33342E-85|from=1521|to=2354|frame=-3|Fragment\_2  
RVAPKVDIRIVLAVTITIIISVIQYYGAWQRYETAISYFMTVPKYRHKALELAK  
>Locus\_2421\_Transcript\_1/1\_Confidence\_1.000\_Length\_2356|UNIGENE

REPRESENTATIVE TRANSCRIPT|sp|Q9VXT2|DJC25\_DROME DnaJ homolog  
subfamily C member 25 homolog OS=Drosophila melanogaster GN=CG7872  
PE=2 SV=1|e=2.33342E-85|from=1521|to=2354|frame=-3|Fragment\_3  
VNDAAG

>Locus\_2421\_Transcript\_1/1\_Confidence\_1.000\_Length\_2356|UNIGENE  
REPRESENTATIVE TRANSCRIPT|sp|Q9VXT2|DJC25\_DROME DnaJ homolog  
subfamily C member 25 homolog OS=Drosophila melanogaster GN=CG7872  
PE=2 SV=1|e=2.33342E-85|from=1521|to=2354|frame=-3|Fragment\_4  
LIRMVIEDNMDIKGAYAKPDLWNILWVQLIISPYTITKYIIWYTSWIWKFDILKRPYGTE  
EKLYLIRKNLKLGEHQFNAI

>Locus\_2421\_Transcript\_1/1\_Confidence\_1.000\_Length\_2356|UNIGENE  
REPRESENTATIVE TRANSCRIPT|sp|Q9VXT2|DJC25\_DROME DnaJ homolog  
subfamily C member 25 homolog OS=Drosophila melanogaster GN=CG7872  
PE=2 SV=1|e=2.33342E-85|from=1521|to=2354|frame=-3|Fragment\_5  
ELWIKDKFIAWKIQQEEMKKNLAENARAKAYRRYMKNHGVSRTMFD

>Locus\_9997\_Transcript\_1/1\_Confidence\_1.000\_Length\_1151|UNIGENE  
REPRESENTATIVE TRANSCRIPT|sp|Q9VYB7|TPST\_DROME Protein-tyrosine  
sulfotransferase OS=Drosophila melanogaster GN=Tango13 PE=2 SV=2|  
e=9.8237E-147|from=69|to=989|frame=3|Fragment\_1  
REPLIFIGGVPRSGTTLMRAMLDAHPDVRCGQETRVIPRILQMRSHWLKSAKESVRL  
AGITKEVMDAAIAAFCLEVIVKHGEPKRLCNKDPLTLKMGTYVLDLFPNAKFLMVRD  
RATVHSIISRKVTITGFDLSSYRQCLQKWNKAIETMHGQCREAGKDRCMMPYEQVLV  
KLWMEKILQFLDVPWSDSVLHHEEFINKPNGVSLKVERSSDQVIKPNLEALTKWVGN  
PQDVVRDMADVAPMLSVLGYDPYANPPNYGQPDSSVKYNTYRIQKEESKWNRAEVL

>Locus\_9997\_Transcript\_1/1\_Confidence\_1.000\_Length\_1151|UNIGENE  
REPRESENTATIVE TRANSCRIPT|sp|Q9VYB7|TPST\_DROME Protein-tyrosine  
sulfotransferase OS=Drosophila melanogaster GN=Tango13 PE=2 SV=2|  
e=9.8237E-147|from=69|to=989|frame=3|Fragment\_2  
DNKQDDFPN

>Locus\_8222\_Transcript\_1/1\_Confidence\_1.000\_Length\_1565|UNIGENE  
REPRESENTATIVE TRANSCRIPT|sp|Q9VYF2|IMPA3\_DROME Putative inositol  
monophosphatase 3 OS=Drosophila melanogaster GN=CG15743 PE=2 SV=1|  
e=7.39149E-74|from=4|to=840|frame=1|Fragment\_1  
GGKEVVLISSETKNDLKSCKGTREGANDPVTNADLRSHCVMYGLNKMFPNIKIISEEKV  
SEAECVPKPLELDSTLLHSDVHKLLDENVSTEDITVWIDPLDATQEFTESLYHYVTTMV  
CVAVRGKPIVGIIHFPFTQKTYWAWIGNTASDSLLEIKNKPVTEKTENAAPTFFIVSR  
GGVSNITKTAFGAQTKVIPAGGAGYKAIQVAQGNATVYIHTTVIKKWDICAGNAILNYLD  
GDMTTLVGDKIDYSSTSNPKNEGGLLAALKDHKMYVEQL

>Locus\_22975\_Transcript\_1/2\_Confidence\_0.750\_Length\_1185|UNIGENE  
REPRESENTATIVE TRANSCRIPT|sp|Q9VYN8|TENA\_DROME Teneurin-a  
OS=Drosophila melanogaster GN=Ten-a PE=1 SV=2|e=9.9257E-134|from=20|  
to=1183|frame=2|Fragment\_1  
LRTMVLMDGSESSEATLHSNNSISLRTGRGLALDSSAWLRHPLLVRDVPILGEMMPLWSQ  
QRAS

>Locus\_22975\_Transcript\_1/2\_Confidence\_0.750\_Length\_1185|UNIGENE  
REPRESENTATIVE TRANSCRIPT|sp|Q9VYN8|TENA\_DROME Teneurin-a  
OS=Drosophila melanogaster GN=Ten-a PE=1 SV=2|e=9.9257E-134|from=20|  
to=1183|frame=2|Fragment\_2  
LGSLTNFMSQRYMLSGDERNPHRTLSREIWNNSRVFGVEFDQFTSKETFYDRDKKLLT  
TSFDPAGLPKFYQPSDGRAPLNITYDRFNRIEGWHWGPAEEHYTYDRRGFLAEVTSPODG  
TKSYTYNDWNLVSEITLASQRRFLFSYDGDGGLRHVTLPSGTHKSFSLQPSIGFLRFTYT  
PPGASRCYTRHYSHGALLQTVFPGDGARVLYRYHASGKLAELLHGDGRSEFSYSPVSGA  
PSSVLHRDTELEYRWDYRYAAGLLVEERLDFS AKTGLSNAKFTYEYDSNFRVSSIQGRIG  
GQTLPAHGLAWD

>Locus\_22975\_Transcript\_2/2\_Confidence\_0.500\_Length\_1143|. |sp| Q9VYN8|TENA\_DROME Teneurin-a OS=Drosophila melanogaster GN=Ten-a PE=1 SV=2|e=1.5582E-128|from=20|to=1141|frame=2|Fragment\_1  
LRTMVLMDGSESSEATLHSNNSISLRTGRGLALDSSAWLRHPLLVRDVPILGEMMPLWSQ  
QRAS

>Locus\_22975\_Transcript\_2/2\_Confidence\_0.500\_Length\_1143|. |sp| Q9VYN8|TENA\_DROME Teneurin-a OS=Drosophila melanogaster GN=Ten-a PE=1 SV=2|e=1.5582E-128|from=20|to=1141|frame=2|Fragment\_2  
LGSLTNFMSQRYMLSGDERNPHRTLSREIWNNSRVFGVEFDQFTSKETFYDRDKKTLT  
TSFDPAGLPKFYQPSDGRAPLNITYDRFNRIEGWHWGPAEEHYTYDRRGFLA EVTSPQDG  
TKSYTYNDWNLVSEITLASQRRFLFSYDGDGGLRHVTLPSGKHSFSLQPSIGFLRFTYT  
PPGASRCYTRHYSHSGALLQTVFPGDGARVLYRYHASGKLAELLHGDGRSEFSYSPVSGA  
PSSVLHRDTELEYRWDYRYAAGLLVEERLDFS AKTGLSNAKFTYEYDSNFRVSSIQR

>Locus\_17231\_Transcript\_1/1\_Confidence\_1.000\_Length\_545|. |sp|Q9VYN8|TENA\_DROME Teneurin-a OS=Drosophila melanogaster GN=Ten-a PE=1 SV=2|e=3.37294E-71|from=2|to=544|frame=2|Fragment\_1  
ENSVQSYAHMDEYSESRVSVMRGQVVTPOQLGIVGIRVSVDRDSRFGFTLTRQGGWFDVL  
VNGGGAVTLQFQRSPFRPLTRTVFVPWNQIVALPTVHMQ

>Locus\_17231\_Transcript\_1/1\_Confidence\_1.000\_Length\_545|. |sp|Q9VYN8|TENA\_DROME Teneurin-a OS=Drosophila melanogaster GN=Ten-a PE=1 SV=2|e=3.37294E-71|from=2|to=544|frame=2|Fragment\_2  
NEETPNGIPPTVPSPAFSFLSLPHY

>Locus\_17231\_Transcript\_1/1\_Confidence\_1.000\_Length\_545|. |sp|Q9VYN8|TENA\_DROME Teneurin-a OS=Drosophila melanogaster GN=Ten-a PE=1 SV=2|e=3.37294E-71|from=2|to=544|frame=2|Fragment\_3  
LPGQGQAS

>Locus\_17231\_Transcript\_1/1\_Confidence\_1.000\_Length\_545|. |sp|Q9VYN8|TENA\_DROME Teneurin-a OS=Drosophila melanogaster GN=Ten-a PE=1 SV=2|e=3.37294E-71|from=2|to=544|frame=2|Fragment\_4  
CAAHDHELLRPRIAATWMPHAVGGKPGKSLVFAETQIVQESIPIPGS

>Locus\_22876\_Transcript\_1/1\_Confidence\_1.000\_Length\_317|. |sp|Q9VYN8|TENA\_DROME Teneurin-a OS=Drosophila melanogaster GN=Ten-a PE=1 SV=2|e=6.93597E-58|from=2|to=316|frame=2|Fragment\_1  
CVCSQGWNGRHCTLPGCENACSRHGQCTLNNGEYSCMCIEGWAGKDCSIALEMDCNDNID  
NDHDGMTDCSDSECCSHPACAEHIMCLASNDPVDVLLRKQPPSVT

>Locus\_29787\_Transcript\_1/1\_Confidence\_1.000\_Length\_274|. |sp|Q9VYN8|TENA\_DROME Teneurin-a OS=Drosophila melanogaster GN=Ten-a PE=1 SV=2|e=1.15968E-36|from=3|to=272|frame=3|Fragment\_1  
TGQQRALVCNGRCDGAAIDAQLLTPVALTSGPDGSLYVGFNLRITPDGKVHTVLQLS  
ATQVAYQYYLVVSPADGHLYISDPERQQVL

>Locus\_18041\_Transcript\_1/1\_Confidence\_1.000\_Length\_1778|UNIGENE REPRESENTATIVE TRANSCRIPT|sp|Q9VZM5|PIGB\_DROME GPI  
mannosyltransferase 3 OS=Drosophila melanogaster GN=CG12006 PE=2 SV=2|e=2.1034E-112|from=44|to=1498|frame=-2|Fragment\_1  
LLILGVRVLSVFAVRTWYVPDEFWQSLEVAHYLTFGYGYLTWEWHERIRNFLYPLFISVL  
YKCLDILHLDSVYMLTTVPRIVQAIIFTGLAEYKLYRWSGHSKWTLFMCLSSWFVFIYSR  
TLLNTVEYGIACIAITQFPWRNCRSGDQCRFLYTIIGLTAMRPTFIIPWIPLCIYHLYNP  
KLIFLKEIIVRYVVITLIILFASVGIDSLVTQRFSTSWNFLKINIVQGVANFYGSHSFH  
WYLLIGLPTILSISIIPFALAAYSMMKNKFS DHISSLMLISITWNLVIYSMITHKEFRFL  
SGSLPMLVVTSKYLSFVCSLRAVPKLVLYFIVCAIMLFNLLPMYYFSWIHQSGTLLMP  
ALLKTVENYSRSNAVPPNLLFLMPCHSTPYSHIHQNL SMRFLTCEPDI

>Locus\_18041\_Transcript\_1/1\_Confidence\_1.000\_Length\_1778|UNIGENE REPRESENTATIVE TRANSCRIPT|sp|Q9VZM5|PIGB\_DROME GPI  
mannosyltransferase 3 OS=Drosophila melanogaster GN=CG12006 PE=2

SV=2|e=2.1034E-112|from=44|to=1498|frame=-2|Fragment\_2  
KYNGIEDEADVYFQNPQKWLIDINYFNVMDDECKSSSSICIGRQNIKDKLPHTLIMFEELQNR  
IHKSLKHYKEVLKLFH  
>Locus\_5299\_Transcript\_2/4\_Confidence\_0.667\_Length\_2193|UNIGENE  
REPRESENTATIVE TRANSCRIPT|"sp|Q9W3V8|ALG8\_DROME Probable dolichyl  
pyrophosphate Glc1Man9GlcNAc2 alpha-1,3-glucosyltransferase  
OS=Drosophila melanogaster GN=CG4542 PE=2 SV=1"|e=1.3305E-119|  
from=861|to=2123|frame=3|Fragment\_1  
TCVKFLFIPAYRSTDFEVHRNWLAIHISKPIYLWYFENTSEWTLDYPPFFAWFEFMLS  
HI  
AKYFDPNMLNVKLNLYASDMTVLFQRLSVMVTDLLLLFGTRECSNSLGKSNSQPKTFLA  
>Locus\_5299\_Transcript\_2/4\_Confidence\_0.667\_Length\_2193|UNIGENE  
REPRESENTATIVE TRANSCRIPT|"sp|Q9W3V8|ALG8\_DROME Probable dolichyl  
pyrophosphate Glc1Man9GlcNAc2 alpha-1,3-glucosyltransferase  
OS=Drosophila melanogaster GN=CG4542 PE=2 SV=1"|e=1.3305E-119|  
from=861|to=2123|frame=3|Fragment\_2  
VLILCNAGLFMVDHIHFQYNGMLYGILLLSISCIMKEQYLMASALWFSILLNLKHIFAYVA  
PAYVVYLLGSYCLQGNFDLSKTAKRISKLVLIGFITCTVSFGPFIRQISQVMARLFPFKR  
GLCHAYWAPNFWAIYNVADKAATITAKKLGYSVSNSTATMTGGLVEDVVHTTLPTITPSI  
TFYLTFITIVPALIKLWRIIRFNKTPIVISPLQFIRCLVICGACSFLLFGWHVHEKAILML  
IIPMSISAVLEKEDAKIFLMLSTIGHYS  
>Locus\_5299\_Transcript\_2/4\_Confidence\_0.667\_Length\_2193|UNIGENE  
REPRESENTATIVE TRANSCRIPT|"sp|Q9W3V8|ALG8\_DROME Probable dolichyl  
pyrophosphate Glc1Man9GlcNAc2 alpha-1,3-glucosyltransferase  
OS=Drosophila melanogaster GN=CG4542 PE=2 SV=1"|e=1.3305E-119|  
from=861|to=2123|frame=3|Fragment\_3  
KALIFISYSGIAFKFLSQLFP  
>Locus\_5299\_Transcript\_4/4\_Confidence\_0.667\_Length\_2193|.|"sp|  
Q9W3V8|ALG8\_DROME Probable dolichyl pyrophosphate Glc1Man9GlcNAc2  
alpha-1,3-glucosyltransferase OS=Drosophila melanogaster GN=CG4542  
PE=2 SV=1"|e=2.964E-119|from=861|to=2123|frame=3|Fragment\_1  
TCVKFLFIPAYRSTDFEVHRNWLAIHISKPIYLWYFENTSEWTLDYPPFFAWFEFMLS  
HI  
AKYFDPNMLNVKLNLYASDMTVLFQRLSVMVTDLLLLFGTRECSNSLGKSNSQPKTFLA  
>Locus\_5299\_Transcript\_4/4\_Confidence\_0.667\_Length\_2193|.|"sp|  
Q9W3V8|ALG8\_DROME Probable dolichyl pyrophosphate Glc1Man9GlcNAc2  
alpha-1,3-glucosyltransferase OS=Drosophila melanogaster GN=CG4542  
PE=2 SV=1"|e=2.964E-119|from=861|to=2123|frame=3|Fragment\_2  
VLILCNAGLFMVDHIHFQYNGMLYGILLLSISCIMKEQYLMASALWFSILLNLKHIFAYVA  
PAYVVYLLGSYCLQGNFDLSKTAKRISKLVLIGFITCTVSFGPFIRQISQVMARLFPFKR  
GLCHAYWAPNFWAIYNVADKASTITAKKLGYSVSNSTATMTGGLVEDVVHTTLPTITPSI  
TFYLTFITIVPALIKLWRIIRFNKTPIVISPLQFIRCLVICGACSFLLFGWHVHEKAILML  
IIPMSISAVLEKEDAKIFLMLSTIGHYS  
>Locus\_5299\_Transcript\_4/4\_Confidence\_0.667\_Length\_2193|.|"sp|  
Q9W3V8|ALG8\_DROME Probable dolichyl pyrophosphate Glc1Man9GlcNAc2  
alpha-1,3-glucosyltransferase OS=Drosophila melanogaster GN=CG4542  
PE=2 SV=1"|e=2.964E-119|from=861|to=2123|frame=3|Fragment\_3  
KALIFISYSGIAFKFLSQLFP  
>Locus\_5299\_Transcript\_3/4\_Confidence\_0.222\_Length\_1259|.|"sp|  
Q9W3V8|ALG8\_DROME Probable dolichyl pyrophosphate Glc1Man9GlcNAc2  
alpha-1,3-glucosyltransferase OS=Drosophila melanogaster GN=CG4542  
PE=2 SV=1"|e=4.33127E-42|from=861|to=1259|frame=3|Fragment\_1  
TCVKFLFIPAYRSTDFEVHRNWLAIHISKPIYLWYFENTSEWTLDYPPFFAWFEFMLS  
HI  
AKYFDPNMLNVKLNLYASDMTVLFQRLSVMVTDLLLLFGTRECCNSLGKSNSQPKTFLA  
>Locus\_5299\_Transcript\_3/4\_Confidence\_0.222\_Length\_1259|.|"sp|  
Q9W3V8|ALG8\_DROME Probable dolichyl pyrophosphate Glc1Man9GlcNAc2

alpha-1,3-glucosyltransferase OS=Drosophila melanogaster GN=CG4542  
PE=2 SV=1" |e=4.33127E-42 |from=861 |to=1259 |frame=3 |Fragment\_2  
FLILCNAGLFMVDH

>Locus\_5299\_Transcript\_1/4\_Confidence\_0.444\_Length\_1056|.|"sp|  
Q9W3V8|ALG8\_DROME Probable dolichyl pyrophosphate Glc1Man9GlcNAc2  
alpha-1,3-glucosyltransferase OS=Drosophila melanogaster GN=CG4542  
PE=2 SV=1" |e=8.60943E-78 |from=3 |to=986 |frame=3 |Fragment\_1  
LLLLFGTRECSNSLGKSNSQPKTFLA

>Locus\_5299\_Transcript\_1/4\_Confidence\_0.444\_Length\_1056|.|"sp|  
Q9W3V8|ALG8\_DROME Probable dolichyl pyrophosphate Glc1Man9GlcNAc2  
alpha-1,3-glucosyltransferase OS=Drosophila melanogaster GN=CG4542  
PE=2 SV=1" |e=8.60943E-78 |from=3 |to=986 |frame=3 |Fragment\_2  
FLILCNAGLFMVDHIHFQYNGMLYGILLLSISCIMKEQYLSALWFSILLNLKHIFAYVA  
PAYVVYLLGSYCLQGNFDLSKTAKRISKLVLIGFITCTVSFGPFIRQISQVMARLFPFKR  
GLCHAYWAPNFWAIYNVADKASTITAKKLGYSVSNSTATMTGGLVEDVVHTTLPTITPSI  
TFYLTFITIVPALIKLWRIIRFNKTPIVISPLQFIRCLVICGACSFLFGWHVHEKAILML  
IIPMSISAVLEKEDAKIFLMLSTIGHYS

>Locus\_5299\_Transcript\_1/4\_Confidence\_0.444\_Length\_1056|.|"sp|  
Q9W3V8|ALG8\_DROME Probable dolichyl pyrophosphate Glc1Man9GlcNAc2  
alpha-1,3-glucosyltransferase OS=Drosophila melanogaster GN=CG4542  
PE=2 SV=1" |e=8.60943E-78 |from=3 |to=986 |frame=3 |Fragment\_3  
KALIFISYSGIAFKFLSQLFP

>Locus\_10077\_Transcript\_1/1\_Confidence\_1.000\_Length\_1120|UNIGENE  
REPRESENTATIVE TRANSCRIPT|sp|Q9W4C5|NAAT1\_DROME Sodium-dependent  
nutrient amino acid transporter 1 OS=Drosophila melanogaster  
GN=NAAT1 PE=1 SV=2 |e=2.1927E-111 |from=3 |to=1118 |frame=-3 |Fragment\_1  
FVIGKPVYYLEMTLGQFTSKSSVKI WALCPILKGIGIGQIISTCCVVSYYCCLMALTLFY  
LYSSFASDLPWSYCKPEWEETINKICVDSAPS NSTTSTLQG

>Locus\_10077\_Transcript\_1/1\_Confidence\_1.000\_Length\_1120|UNIGENE  
REPRESENTATIVE TRANSCRIPT|sp|Q9W4C5|NAAT1\_DROME Sodium-dependent  
nutrient amino acid transporter 1 OS=Drosophila melanogaster  
GN=NAAT1 PE=1 SV=2 |e=2.1927E-111 |from=3 |to=1118 |frame=-3 |Fragment\_2  
NLTRGI

>Locus\_10077\_Transcript\_1/1\_Confidence\_1.000\_Length\_1120|UNIGENE  
REPRESENTATIVE TRANSCRIPT|sp|Q9W4C5|NAAT1\_DROME Sodium-dependent  
nutrient amino acid transporter 1 OS=Drosophila melanogaster  
GN=NAAT1 PE=1 SV=2 |e=2.1927E-111 |from=3 |to=1118 |frame=-3 |Fragment\_3  
SSELFFVKEVLKENKLISSSLGLPDVNL TIC

>Locus\_10077\_Transcript\_1/1\_Confidence\_1.000\_Length\_1120|UNIGENE  
REPRESENTATIVE TRANSCRIPT|sp|Q9W4C5|NAAT1\_DROME Sodium-dependent  
nutrient amino acid transporter 1 OS=Drosophila melanogaster  
GN=NAAT1 PE=1 SV=2 |e=2.1927E-111 |from=3 |to=1118 |frame=-3 |Fragment\_4  
SYFLAIFPYVVMIAL LIRAATLEGAGKGILFFIEPQWGELLPKVKWEAVNQCFSLAIS  
FGPILIFSSYNNFDRNIHRDVLIVTTLDTFTSLLAGTTIFGILGNLAHNLNIDDIGQVIQ  
SGTGLAFISYPDAISKFDMVPQ

>Locus\_10077\_Transcript\_1/1\_Confidence\_1.000\_Length\_1120|UNIGENE  
REPRESENTATIVE TRANSCRIPT|sp|Q9W4C5|NAAT1\_DROME Sodium-dependent  
nutrient amino acid transporter 1 OS=Drosophila melanogaster  
GN=NAAT1 PE=1 SV=2 |e=2.1927E-111 |from=3 |to=1118 |frame=-3 |Fragment\_5  
SAVALHGAIITVISDQF

>Locus\_10077\_Transcript\_1/1\_Confidence\_1.000\_Length\_1120|UNIGENE  
REPRESENTATIVE TRANSCRIPT|sp|Q9W4C5|NAAT1\_DROME Sodium-dependent  
nutrient amino acid transporter 1 OS=Drosophila melanogaster  
GN=NAAT1 PE=1 SV=2 |e=2.1927E-111 |from=3 |to=1118 |frame=-3 |Fragment\_6

GIRYWKVALAASTVGFLIGLVYVTPEGQWLLNLVDY  
>Locus\_13104\_Transcript\_1/2\_Confidence\_0.750\_Length\_1001|. |sp|  
Q9W4C5|NAAT1\_DROME Sodium-dependent nutrient amino acid transporter  
1 OS=Drosophila melanogaster GN=NAAT1 PE=1 SV=2|e=2.96707E-56|  
from=1|to=600|frame=1|Fragment\_1  
YWKVALAASTVGFLIGLVYVTPEGQWLLNLVDYFGATFLIFALAIQNIQVFWIYGL  
CLDVEFMVGVVRVGPYWRICWGFVTPVLMTIIFIYSLAVMKPLKYSELFYPDSY  
AAGWTMLAVGILQVPLWAIWIYLNKRKHSINDTLKNVFTPNEKWPKSNKIRKEWIK  
FKTSAKERR  
>Locus\_13104\_Transcript\_1/2\_Confidence\_0.750\_Length\_1001|. |sp|  
Q9W4C5|NAAT1\_DROME Sodium-dependent nutrient amino acid transporter  
1 OS=Drosophila melanogaster GN=NAAT1 PE=1 SV=2|e=2.96707E-56|  
from=1|to=600|frame=1|Fragment\_2  
EAMNLNLFQHVMYSFLGKYK  
>Locus\_13104\_Transcript\_2/2\_Confidence\_0.750\_Length\_1001|. |sp|  
Q9W4C5|NAAT1\_DROME Sodium-dependent nutrient amino acid transporter  
1 OS=Drosophila melanogaster GN=NAAT1 PE=1 SV=2|e=2.96707E-56|  
from=1|to=600|frame=1|Fragment\_1  
YWKVALAASTVGFLIGLVYVTPEGQWLLNLVDYFGATFLIFALAIQNIQVFWIYGL  
CLDVEFMVGVVRVGPYWRICWGFVTPVLMTIIFIYSLAVMKPLKYSELFYPDSY  
AAGWTMLAVGILQVPLWAIWIYLNKRKHSINDTLKNVFTPNEKWPKSNKIRKEWIK  
FKTSAKERR  
>Locus\_13104\_Transcript\_2/2\_Confidence\_0.750\_Length\_1001|. |sp|  
Q9W4C5|NAAT1\_DROME Sodium-dependent nutrient amino acid transporter  
1 OS=Drosophila melanogaster GN=NAAT1 PE=1 SV=2|e=2.96707E-56|  
from=1|to=600|frame=1|Fragment\_2  
EAMNLNLFQHVMYSFLGKYK  
>Locus\_29275\_Transcript\_1/1\_Confidence\_1.000\_Length\_209|. |sp|Q9W4C5|  
NAAT1\_DROME Sodium-dependent nutrient amino acid transporter 1  
OS=Drosophila melanogaster GN=NAAT1 PE=1 SV=2|e=4.09864E-13|  
from=3|to=155|frame=-1|Fragment\_1  
VALHGAIITVISDQF  
>Locus\_29275\_Transcript\_1/1\_Confidence\_1.000\_Length\_209|. |sp|Q9W4C5|  
NAAT1\_DROME Sodium-dependent nutrient amino acid transporter 1  
OS=Drosophila melanogaster GN=NAAT1 PE=1 SV=2|e=4.09864E-13|  
from=3|to=155|frame=-1|Fragment\_2  
GIRYWKVALAASTVGFLIGLVYVTPEGQWLLNLVDY  
>Locus\_3907\_Transcript\_7/7\_Confidence\_0.438\_Length\_2688|UNIGENE  
REPRESENTATIVE TRANSCRIPT|sp|Q9W534|M00DY\_DROME G-protein coupled  
receptor moody OS=Drosophila melanogaster GN=moody PE=2 SV=2|  
e=1.6289E-114|from=1040|to=2167|frame=-3|Fragment\_1  
FSRPLLT  
>Locus\_3907\_Transcript\_7/7\_Confidence\_0.438\_Length\_2688|UNIGENE  
REPRESENTATIVE TRANSCRIPT|sp|Q9W534|M00DY\_DROME G-protein coupled  
receptor moody OS=Drosophila melanogaster GN=moody PE=2 SV=2|  
e=1.6289E-114|from=1040|to=2167|frame=-3|Fragment\_2  
IVGILGNSLTVALLRCPKVRNVAAAFIISLCFADLVFCSIVLPFSAARFVQ  
>Locus\_3907\_Transcript\_7/7\_Confidence\_0.438\_Length\_2688|UNIGENE  
REPRESENTATIVE TRANSCRIPT|sp|Q9W534|M00DY\_DROME G-protein coupled  
receptor moody OS=Drosophila melanogaster GN=moody PE=2 SV=2|  
e=1.6289E-114|from=1040|to=2167|frame=-3|Fragment\_3  
SLISSENEGVMGNVTLCKLVPFMRYGSVGSLLSIAMITVNRVIMITHSGIYARVYR  
KRYIAAMLIGAWIFS YGFQVPTLLGVWGAFA YDPR LGTCSVTKDSRGASSKTALFV  
VGFVTPCIVIIACYARIFWVVHSSEVRMRQHAANKPKQN  
>Locus\_3907\_Transcript\_7/7\_Confidence\_0.438\_Length\_2688|UNIGENE  
REPRESENTATIVE TRANSCRIPT|sp|Q9W534|M00DY\_DROME G-protein coupled

receptor moody OS=Drosophila melanogaster GN=moody PE=2 SV=2|  
e=1.6289E-114|from=1040|to=2167|frame=-3|Fragment\_4  
NGNSATPA  
>Locus\_3907\_Transcript\_7/7\_Confidence\_0.438\_Length\_2688|UNIGENE  
REPRESENTATIVE TRANSCRIPT|sp|Q9W534|MOODY\_DROME G-protein coupled  
receptor moody OS=Drosophila melanogaster GN=moody PE=2 SV=2|  
e=1.6289E-114|from=1040|to=2167|frame=-3|Fragment\_5  
KNGPQIARTPESSGARMKRNEWKITKMLAIFLSFVVCYLPITIAKVADPEVKYPGLHIM  
GYILLYLSACINPIIYVIMNKQYRQAYKTVLLCERPRIL  
>Locus\_3907\_Transcript\_7/7\_Confidence\_0.438\_Length\_2688|UNIGENE  
REPRESENTATIVE TRANSCRIPT|sp|Q9W534|MOODY\_DROME G-protein coupled  
receptor moody OS=Drosophila melanogaster GN=moody PE=2 SV=2|  
e=1.6289E-114|from=1040|to=2167|frame=-3|Fragment\_6  
NFTAGGNSSAQEKSKERLACSYNHSRTFLSIVS  
>Locus\_3907\_Transcript\_6/7\_Confidence\_0.438\_Length\_2123|. |sp|Q9W534|  
MOODY\_DROME G-protein coupled receptor moody OS=Drosophila  
melanogaster GN=moody PE=2 SV=2|e=1.2466E-114|from=475|to=1602|  
frame=-3|Fragment\_1  
FSRPLLT  
>Locus\_3907\_Transcript\_6/7\_Confidence\_0.438\_Length\_2123|. |sp|Q9W534|  
MOODY\_DROME G-protein coupled receptor moody OS=Drosophila  
melanogaster GN=moody PE=2 SV=2|e=1.2466E-114|from=475|to=1602|  
frame=-3|Fragment\_2  
IVGILGNSLTVVALLRCPKVRNVAAAFIISLCFADLVFCSIVLPFSAARFVQ  
>Locus\_3907\_Transcript\_6/7\_Confidence\_0.438\_Length\_2123|. |sp|Q9W534|  
MOODY\_DROME G-protein coupled receptor moody OS=Drosophila  
melanogaster GN=moody PE=2 SV=2|e=1.2466E-114|from=475|to=1602|  
frame=-3|Fragment\_3  
SLISSENEGVMGNVTLCKLVPMRYGSGVSVLLSIAMITVNRVIMITHSGIYARVYRKRY  
IAAMLIGAWIFS YGFQVPTLLGVWGAFA YDPR LGTCSVTKDSRGASSKTALFVVGFTPC  
IVIIACYARIFWVVSSEVRMRQHAANKPQN  
>Locus\_3907\_Transcript\_6/7\_Confidence\_0.438\_Length\_2123|. |sp|Q9W534|  
MOODY\_DROME G-protein coupled receptor moody OS=Drosophila  
melanogaster GN=moody PE=2 SV=2|e=1.2466E-114|from=475|to=1602|  
frame=-3|Fragment\_4  
NGNSATPA  
>Locus\_3907\_Transcript\_6/7\_Confidence\_0.438\_Length\_2123|. |sp|Q9W534|  
MOODY\_DROME G-protein coupled receptor moody OS=Drosophila  
melanogaster GN=moody PE=2 SV=2|e=1.2466E-114|from=475|to=1602|  
frame=-3|Fragment\_5  
KNGPQIARTPESSGARMKRNEWKITKMLAIFLSFVVCYLPITIAKVADPEVKYPGLHIM  
GYILLYLSACINPIIYVIMNKQYRQAYKTVLLCERPRIL  
>Locus\_3907\_Transcript\_6/7\_Confidence\_0.438\_Length\_2123|. |sp|Q9W534|  
MOODY\_DROME G-protein coupled receptor moody OS=Drosophila  
melanogaster GN=moody PE=2 SV=2|e=1.2466E-114|from=475|to=1602|  
frame=-3|Fragment\_6  
NFTAGGNSSAQEKSKERLACSYNHSRTFLSIVS  
>Locus\_3907\_Transcript\_3/7\_Confidence\_0.375\_Length\_2017|. |sp|Q9W534|  
MOODY\_DROME G-protein coupled receptor moody OS=Drosophila  
melanogaster GN=moody PE=2 SV=2|e=1.43994E-96|from=1040|to=2017|  
frame=-1|Fragment\_1  
ADLVFCSIVLPFSAARFVQ  
>Locus\_3907\_Transcript\_3/7\_Confidence\_0.375\_Length\_2017|. |sp|Q9W534|  
MOODY\_DROME G-protein coupled receptor moody OS=Drosophila

melanogaster GN=moody PE=2 SV=2|e=1.43994E-96|from=1040|to=2017|  
frame=-1|Fragment\_2  
SLISSDNEGVMGNVTLCKLVPMRYGSVGVSLLSIAMITVNRYIMITHSGIYARVYRKRY  
IAAMLIGAWIFSYPQVPTLLGVWGAFAFDPRGLTCSVTKDSRGASSKTALFVVGFTPC  
IVIIACYARIFWVVSSEVRMRQHAANKPNQ  
>Locus\_3907\_Transcript\_3/7\_Confidence\_0.375\_Length\_2017|. |sp|Q9W534|  
MOODY\_DROME G-protein coupled receptor moody OS=Drosophila  
melanogaster GN=moody PE=2 SV=2|e=1.43994E-96|from=1040|to=2017|  
frame=-1|Fragment\_3  
NGNSATPA  
>Locus\_3907\_Transcript\_3/7\_Confidence\_0.375\_Length\_2017|. |sp|Q9W534|  
MOODY\_DROME G-protein coupled receptor moody OS=Drosophila  
melanogaster GN=moody PE=2 SV=2|e=1.43994E-96|from=1040|to=2017|  
frame=-1|Fragment\_4  
KNGPQIARTPESSGARMKRNEWRIKMLAIFLSFVVCYLPITIAKVADPEVKYPGLHIM  
GYILLYLSACINPIIYVIMNKQYRQAYKTVLLCERPRIL  
>Locus\_3907\_Transcript\_3/7\_Confidence\_0.375\_Length\_2017|. |sp|Q9W534|  
MOODY\_DROME G-protein coupled receptor moody OS=Drosophila  
melanogaster GN=moody PE=2 SV=2|e=1.43994E-96|from=1040|to=2017|  
frame=-1|Fragment\_5  
NFTAGGNSSAQEKSKERLACSYNHSRTFLSIVS  
>Locus\_3907\_Transcript\_2/7\_Confidence\_0.438\_Length\_1327|. |sp|Q9W534|  
MOODY\_DROME G-protein coupled receptor moody OS=Drosophila  
melanogaster GN=moody PE=2 SV=2|e=2.43956E-75|from=3|to=806|  
frame=-3|Fragment\_1  
FSRPLLT  
>Locus\_3907\_Transcript\_2/7\_Confidence\_0.438\_Length\_1327|. |sp|Q9W534|  
MOODY\_DROME G-protein coupled receptor moody OS=Drosophila  
melanogaster GN=moody PE=2 SV=2|e=2.43956E-75|from=3|to=806|  
frame=-3|Fragment\_2  
IVGILGNSLTVVALLRCPKVRNVAAFIISLCFADLVFCSIVLPFSAARFVQ  
>Locus\_3907\_Transcript\_2/7\_Confidence\_0.438\_Length\_1327|. |sp|Q9W534|  
MOODY\_DROME G-protein coupled receptor moody OS=Drosophila  
melanogaster GN=moody PE=2 SV=2|e=2.43956E-75|from=3|to=806|  
frame=-3|Fragment\_3  
SLISSENEGVMGNVTLCKLVPMRYGSVGVSLLSIAMITVNRYIMITHSGIYARVYRKRY  
IAAMLIGAWIFSYPQVPTLLGVWGAFAFDPRGLTCSVTKDSRGASSKTALFVVGFTPC  
IVIIACYARIFWVVSSEVRMRQHAANKPNQ  
>Locus\_3907\_Transcript\_2/7\_Confidence\_0.438\_Length\_1327|. |sp|Q9W534|  
MOODY\_DROME G-protein coupled receptor moody OS=Drosophila  
melanogaster GN=moody PE=2 SV=2|e=2.43956E-75|from=3|to=806|  
frame=-3|Fragment\_4  
NGNSATP  
>Locus\_3907\_Transcript\_2/7\_Confidence\_0.438\_Length\_1327|. |sp|Q9W534|  
MOODY\_DROME G-protein coupled receptor moody OS=Drosophila  
melanogaster GN=moody PE=2 SV=2|e=2.43956E-75|from=3|to=806|  
frame=-3|Fragment\_5  
AKSG  
>Locus\_3907\_Transcript\_2/7\_Confidence\_0.438\_Length\_1327|. |sp|Q9W534|  
MOODY\_DROME G-protein coupled receptor moody OS=Drosophila  
melanogaster GN=moody PE=2 SV=2|e=2.43956E-75|from=3|to=806|  
frame=-3|Fragment\_6  
PQIARTPESSGARMKRNEWRI  
>Locus\_3907\_Transcript\_4/7\_Confidence\_0.438\_Length\_1327|. |sp|Q9W534|

MOODY\_DROME G-protein coupled receptor moody OS=Drosophila melanogaster GN=moody PE=2 SV=2|e=2.43956E-75|from=3|to=806|frame=-3|Fragment\_1  
FSRPLLTf  
>Locus\_3907\_Transcript\_4/7\_Confidence\_0.438\_Length\_1327|. |sp|Q9W534|  
MOODY\_DROME G-protein coupled receptor moody OS=Drosophila melanogaster GN=moody PE=2 SV=2|e=2.43956E-75|from=3|to=806|frame=-3|Fragment\_2  
IVGILGNSLTVVALLRCPKVRNVAAAFIISLCFADLVFCSIVLPFSAARFVQ  
>Locus\_3907\_Transcript\_4/7\_Confidence\_0.438\_Length\_1327|. |sp|Q9W534|  
MOODY\_DROME G-protein coupled receptor moody OS=Drosophila melanogaster GN=moody PE=2 SV=2|e=2.43956E-75|from=3|to=806|frame=-3|Fragment\_3  
SLISSENEGVMGNVTLCKLVPFMRYGSVGVSLLSIAMITVNRVIMITHSGIYARVYRKRY  
IAAMLIGAWIFS YGFQVPTLLGVWGAFAYDPRLGTCSVTKDSRGASSKTALFVVGFTPC  
IVIIACYARIFWVVSSEVRMRQHAANKPQN  
>Locus\_3907\_Transcript\_4/7\_Confidence\_0.438\_Length\_1327|. |sp|Q9W534|  
MOODY\_DROME G-protein coupled receptor moody OS=Drosophila melanogaster GN=moody PE=2 SV=2|e=2.43956E-75|from=3|to=806|frame=-3|Fragment\_4  
NGNSATP  
>Locus\_3907\_Transcript\_4/7\_Confidence\_0.438\_Length\_1327|. |sp|Q9W534|  
MOODY\_DROME G-protein coupled receptor moody OS=Drosophila melanogaster GN=moody PE=2 SV=2|e=2.43956E-75|from=3|to=806|frame=-3|Fragment\_5  
AKSG  
>Locus\_3907\_Transcript\_4/7\_Confidence\_0.438\_Length\_1327|. |sp|Q9W534|  
MOODY\_DROME G-protein coupled receptor moody OS=Drosophila melanogaster GN=moody PE=2 SV=2|e=2.43956E-75|from=3|to=806|frame=-3|Fragment\_6  
PQIARTPESSGARMKRNEWRI  
>Locus\_3907\_Transcript\_5/7\_Confidence\_0.375\_Length\_1327|. |sp|Q9W534|  
MOODY\_DROME G-protein coupled receptor moody OS=Drosophila melanogaster GN=moody PE=2 SV=2|e=2.43956E-75|from=3|to=806|frame=-3|Fragment\_1  
FSRPLLTf  
>Locus\_3907\_Transcript\_5/7\_Confidence\_0.375\_Length\_1327|. |sp|Q9W534|  
MOODY\_DROME G-protein coupled receptor moody OS=Drosophila melanogaster GN=moody PE=2 SV=2|e=2.43956E-75|from=3|to=806|frame=-3|Fragment\_2  
IVGILGNSLTVVALLRCPKVRNVAAAFIISLCFADLVFCSIVLPFSAARFVQ  
>Locus\_3907\_Transcript\_5/7\_Confidence\_0.375\_Length\_1327|. |sp|Q9W534|  
MOODY\_DROME G-protein coupled receptor moody OS=Drosophila melanogaster GN=moody PE=2 SV=2|e=2.43956E-75|from=3|to=806|frame=-3|Fragment\_3  
SLISSENEGVMGNVTLCKLVPFMRYGSVGVSLLSIAMITVNRVIMITHSGIYARVYRKRY  
IAAMLIGAWIFS YGFQVPTLLGVWGAFAYDPRLGTCSVTKDSRGASSKTALFVVGFTPC  
IVIIACYARIFWVVSSEVRMRQHAANKPQN  
>Locus\_3907\_Transcript\_5/7\_Confidence\_0.375\_Length\_1327|. |sp|Q9W534|  
MOODY\_DROME G-protein coupled receptor moody OS=Drosophila melanogaster GN=moody PE=2 SV=2|e=2.43956E-75|from=3|to=806|frame=-3|Fragment\_4  
NGNSATP  
>Locus\_3907\_Transcript\_5/7\_Confidence\_0.375\_Length\_1327|. |sp|Q9W534|

MOODY\_DROME G-protein coupled receptor moody OS=Drosophila melanogaster GN=moody PE=2 SV=2|e=2.43956E-75|from=3|to=806|frame=-3|Fragment\_5  
AKSG  
>Locus\_3907\_Transcript\_5/7\_Confidence\_0.375\_Length\_1327|. |sp|Q9W534|  
MOODY\_DROME G-protein coupled receptor moody OS=Drosophila melanogaster GN=moody PE=2 SV=2|e=2.43956E-75|from=3|to=806|frame=-3|Fragment\_6  
PQIARTPESSGARMKRNEWRI  
>Locus\_3907\_Transcript\_1/7\_Confidence\_0.188\_Length\_1245|. |sp|Q9W534|  
MOODY\_DROME G-protein coupled receptor moody OS=Drosophila melanogaster GN=moody PE=2 SV=2|e=4.15521E-13|from=1040|to=1243|frame=-3|Fragment\_1  
LYLSACINPIIYVIMNKQYRQAYKTVLLCERPRIL  
>Locus\_3907\_Transcript\_1/7\_Confidence\_0.188\_Length\_1245|. |sp|Q9W534|  
MOODY\_DROME G-protein coupled receptor moody OS=Drosophila melanogaster GN=moody PE=2 SV=2|e=4.15521E-13|from=1040|to=1243|frame=-3|Fragment\_2  
NFTAGGNSSAQEKSKERLACSYNHSRTFLSIVS  
>Locus\_14715\_Transcript\_1/1\_Confidence\_1.000\_Length\_320|. |sp|Q9W534|  
MOODY\_DROME G-protein coupled receptor moody OS=Drosophila melanogaster GN=moody PE=2 SV=2|e=2.39329E-34|from=37|to=318|frame=1|Fragment\_1  
QIARTPESSGARMKRNEWRIKTMVLAIFLSFVVCYLPITIAKVADPEVKYPGLHIMGYIL  
LYLSACINPIIYVIMNKQYRQAYKTVLLCERPRI  
>Locus\_23513\_Transcript\_1/1\_Confidence\_1.000\_Length\_320|. |sp|Q9W534|  
MOODY\_DROME G-protein coupled receptor moody OS=Drosophila melanogaster GN=moody PE=2 SV=2|e=2.39329E-34|from=37|to=318|frame=1|Fragment\_1  
QIARTPESSGARMKRNEWRIKTMVLAIFLSFVVCYLPITIAKVADPEVKYPGLHIMGYIL  
LYLSACINPIIYVIMNKQYRQAYKTVLLCERPRI  
  
>Locus\_24585\_Transcript\_1/1\_Confidence\_1.000\_Length\_292|UNIGENE  
REPRESENTATIVE TRANSCRIPT|sp|Q9W5D4|POMT2\_DROME Protein O-mannosyl-transferase 2 OS=Drosophila melanogaster GN=tw PE=2 SV=1|e=2.00627E-44|from=2|to=289|frame=2|Fragment\_1  
VFGVITLLTFCTRFYKVTEPDHVCWDETHFGKMASWYINRTFFFVDVHPPLGKMLIALSGT  
LTGYDGTYPFEKPGDKYNGTRYEGMRIFCTAVGAAI
