# Supplementary material for: A reverse vaccinology approach to the identification and characterization of Ctenocephalides felis candidate protective antigens for the control of cat flea infestations
Source: PubMed Central journal article supplement (PMC5774092; doi:10.1186/s13071-018-2618-x), 2018-01-18
Supplement: 13071_2018_2618_MOESM2_ESM.pdf [file 13071_2018_2618_MOESM2_ESM.pdf]

## Additional file 2. Dataset 2. Coding sequences for selected candidate protective antigens.

### Sequence ID: F1

>gi|241896700|emb|FN421429.1| Ctenocephalides felis argk1 gene for arginine kinase 1  
ATGGTTGACGCAGCCGTCTTGGACAAATTGGAATCTGGCTACGCCAAATTGGCAGCCTCAGATTCCAAAT  
CCCTTTTGAAGAAACATTTAACAAGGAAATCTTTGACAACCTCAAACCAAGAAGACTTCCTTTGGCTC  
TACCTTGCTTGACTGCATCCAGTCTGGTAAGATCTAGGAACTAACAATAATTTTCATTGATATTATGAT  
ATTATAATAAGCTCATGTCTCATTTTTGTATTATTTAGGTTTGGAAAACCATGATTACAGGTGTAGGTATC  
TATGCCCCAGATGCTGAAGCTTACTCCGTTTTTGTGATCTGTTTCGACCCGATCATTGAAGAATATCACT  
TCGGTTTTCAAGAAAACCTGACAAGCACCCCCCAAGAAGTGGGGTGATGTAGATACTTTGGGCAACTTGG  
CCCCACTGGTGAATTTGTTGTATCCACCCGTGTCCGTTGTGGACGTTCCATGGAAGGCTATCCATTCAAC  
CCTTGCTTGACTGAAGCCCAATACAAGGAAATGGAAGAAAAAGTATCCAGCACACTTTCTGGATTGGAAG  
GAGAATTGAAAGGAAAATTCACCCATTGACTGGTATGCCAAAAGATGTTTCAGCAACAGCTCATTGATGA  
TCACTTCTTATTCAAGGAGGGCGATCGTTTTCTTGCAATCTGCTAATGCTTGCCGTTTTCTGGCCAACCTGGA  
CGTGGTATCTACAAATGATAACAAAACCTTTCTCGTCTGGTGAATGAGGAAGATCACTTGAGAATCA  
TCTCCATGCAAAATGGGAGGAGATTTAGGCTGTGTGTACCGTCTGTTGAAATGCTGTGAATGATATTGA  
GAAGCGTATTCTTTCTCTCACCACGATAGATTAGGTTTCTCACTTTCTGTCCCACTAACTTGGGAACT  
ACTGTCCGTGCCTCTGTGCACATCAAGGTCCTAAGTTGGCTGCTAACCGCGCCAAGTTGGAAGAAGTTG  
CTGGACGTTACAATCTCCAAGTTCGTGGAACCTCGTGGTGAACACACTGAAGCTGAAGGTGGTGTCTACGA  
TATCTCCAACAAGAGGCGCATGGGCCTGACTGAATACCAAGCTGTCAAGGAGATGCACGATGGCATTGCT  
GAACTCATTAAGATGGAGAAAGAAATGTAA

Sequence of the primers used for cloning coding regions by RT-PCR:  
Forward: 5'-CACCATGGTTGACGCAGCCGTCTT-3'  
Reverse: 5'-TTACATTTCTTTCTCCATCTTA-3'

### Sequence ID: F2

>gb|S66043.1|:122-3235 sodium pump alpha subunit [Ctenocephalides felis=cat fleas, mRNA, 3369 nt]  
ATGGATGATAAGCATGGGCGTTCCGATTTCGTATCGCGTGGCTACAGTACCTACCATAGATGACAATTTGA  
CAGCAGACGGTCAATACAAGTCGCGACGTAACGCAACGAAAAAGCAAAGGAAGGAGAGCTTGA  
TGACTTGAACAAGAATTAGATATCGATTTTACAAAAGTATCACCCGAAGAATTATCAACGATTTAAT  
ACTCACCCCGAAAATGGTCTTAGTACAGCCAAAGCGAAAAGAAAACCTAGAAAGAGATGGACCGAATGCTT  
TGACCCCGCCGAAAACAAACACCAGAATGGGTCAAATTTTGAAGAACTTGTTTGGAGGATTGCGCTTGTT  
GTTGTGGATCGGTGCCATTTTATGTTTTGTGCGATACTCCATCCAAGCTAGTACTGTGGAAGAACCAGCA  
GATGATAATTTGTATCTTGGTATTGTATTGGCGGCTGTAGTTATAGTTACTGGTATATTTTCGTATTACC  
AAGAATCCAAGAGTTCCAAAATTATGGAAAGTTTCAAAAACATGGTTCCACAGTTTGCAACAGTATTACG  
TGAAGGTGAAAAATTAACCTTACGAGCGGAAGATTTAGTACTCGGAGATGTCGTAGAAGTGAATTCGGC  
AGCAGGATACCTGCAGATATCCGTATTATTGAAAGCCGAGGATTCAAGGTAGACAAGTCTTCCTTGACTG  
GTGAATCAGAACCTCAATCTCGAGGTCCCAGTTTTACAAATGAAAAGCCTTTAGAAACGAAGAAGTGGC  
GTTCTTCTCTATCAACGCCGTGCAAGGTACTGCCAAAGGTGTGCTTATCAGCTGTGGAGACAACACTGTC  
ATGGGTGCTATTGCCGGCTTGGCTTCAGGCTTGGACACTGGGGAGACTCCAATCGCTAAAGAAATTCATC  
ACTTCATTCATCTCATCACTGGAGTCGCTGATTTTTAGGTGTAACATTCTTTGTTATTGCAATATTTTT  
GAACTACCATTGGTTAGACGCTGTATCTTTGATTGGTATCATCGTCGCTAATGTCCCTGAAGGTTTA  
TTGGCTACTGTAACCGTATGTCTAACCTTACTGCTAAGCGTATGGCATCCAAGAATTGTCTTGTCAAGA  
ATCTTGAAGCTGTAGAACTCTTGGTTCTACCTCAACTATCTGCTCAGACAAAACCTGGCACACTGACCCA  
GAACAGAATGACTGTAGCCACATGTGGTTTGAACAACAGATTATTGAAGCCGACACCACTGAAGATCAA  
TCTGGAGTCGTATATGACAGAACCAGCCCTGGTTTTCAAAGCTTTGGCGCGCATTGCAACTTTGTGCAACA  
GAGCAGAATTAAGGGAGGTGAGGAAGGTGATCCCATCTTGAAGAAAGTCAAGTGGTGTATGCATCTGA  
AGCTGCTCTTCTCAAATGTATGGAAGTGGCTTTAGGAGATGTTATGTCTATTGAAAACGAAATAAGAAA  
GTCTGTGAAATTCATTTAACTCCACAAAACAAATACCAGGTTTTCCATTACGAAAACCTGAAGATGCGTCA  
ACCCCGTCATGTAATGGTTATGAAAGGAGCTCCTGAAAGAATCTTAGAAAATGTTCCACCATCTTCAT

TGGAGGAAAGGAAAACTACTGGACGAAGAGATGAAAGAAGCTTTCAATAATGCATATCTGGAATTGGGC  
GGTCTTGGAGAGCGTGTATTGGGCTTTTGTGATCTCATGTTGCCTACAGACAAATTCCCCTTAGGTTTCA  
AATTGCAGACGCGATGATCCCAACTTCCCAATTGAAAACCTTAGATTTGTTGGACTCATGTCTATGATTGA  
TCCTCCTAGAGCTGCCGTACCTGACGCTGTTGCCAAGTGCCGATCTGCTGGTATCAAGGTTATCATGGTT  
ACAGGAGATCATCCAATCACTGCAAAAGCCATTGCTAAATCAGTGGGTATCATCTCAGAGGGTAATGAAA  
CTGTAGAAGATATCGCGCAAAGATTGAATATTCCTGTATCAGAGGTAAATCCACGAGAAGCCAAGGCAGC  
TGTTGTACATGGAAGCTGAGCTTAGGGAAGCTCAACTCTGATCAGCTCGATGAAATTTCTTAGGTATCACACT  
GAAATTGTATTTGCTCGGACATCTCCTCAACAAAAGCTGATTATTGTTGAAGGATGCCAACGTATGGGTG  
CTATTGTCGCCGTAAGTGGTGTGATGGTGTGAATGACTCACCTGCTTTGAAAAAGGCTGATATTGGTGTTC  
CATGGGTATTGCCGGATCTGATGTATCAAAACAGGCTGCTGACATGATTTTATTAGATGACAACCTTTGCA  
TCTATTGTCACTGGTGTGGAAGAGGGTCTGTTGATATTCGACAATCTGAAGAAATCTATTGCTTACACAT  
TGACTTCAAATATCCAGAAATTTACCATTCTTGGCATTTCATCTTATGTGATATCCCGCTACCTTTGGG  
AACTGTAACAATCTTGTGCATTGACTTGGGAAGTACATGGTGCCTGCCATCTCATTGGCCTACGAACAT  
GCTGAAGCTGATATCATGAAGAGGCCGCTAGAGATCCAGTCAATGACAAACTTGTAATTTCCAGACTTA  
TCTCTATGGCTTATGGGCAAATCGGAATGATTCAAGCAGCTGCTGGATTCTTTGTATACTTTGTAATCAT  
GGCTGAAAATGGATTCTTACCCATGAAATTTGTTTGGAAATTAGAAAACAATGGGACTCGAAAGCTGTCAAT  
GATCTAACAGATTCTTATGGACAAGAATGGACATACAGAGATCGCAAGACTCTTGAATATACCTGCCACA  
CTGCCTTCTTCGTCTCTATTGTCGTTGTACAATGGGCTGATTTGATTGTCTGCAAAACGCGCCGTAATTC  
CTTGTACACCAGGGAATGAGAAATTTGGGCTCTCAACTTTGGTCTAGTTTTTGAAGTGCCTTAGCAGCA  
TTCTGTATACACACCAGGAATGGACAAGGGACTGAGGATGTTCCCACTGAAGTTTTGTTTGGTGGCTGC  
CTGCTCTGCCATTCATGATTTCCATCTTCATCTATGATGAGACTAGAAGATTTTACCTACGTGCAACCC  
TGGTGGTTGGTTAGAACAAGAAACATATTATTA

Sequence of the primers used for cloning coding regions by RT-PCR:

Forward: 5'-CACCATGGATGATAAGCATGGGCGTT-3'

Reverse: 5'-TTAATAATATGTTTCTTGTCTAACC-3'

**Sequence ID: F3**

>gi|25527510|gb|AY150533.1| Ctenocephalides felis serpin 4 mRNA,  
partial cds

ATGGCGGATCCCCAGGAATTGTCTACAAGTATTAACCAGTTTGGCTGGAAGCCTGTACAATACGGTTGCTTC  
TGGCAACAAAGACAATCTCATCATGTCCCCATTGTCTGTACAACTGTTCTATCCCTGGTGTCAATGGGAG  
CTGGTGGTAATACTGCCACACAAATAGCTGCTGGTTTACGTGAGCCTCAATCAAAAGAAAAAATTCAGAT  
GACTACCATGCATTGATGAACACTCTTAATACACAAAAAGGTGTAAGTCTGGAAATTGCCAACAAAGTTTA  
CGTTATGGAAGGCTATACATTGAAACCCACCTTCAAAGAAGTTGCCACCAACAAATTCCTTAGCTGGAGCAG  
AAAACCTGAACTTTGCCAAAATGCTGAAAGCGCTAAAGTTATCAACACTTGGGTTGAAGAAAAAATCAT  
GACAAAATTCATGATTTGATCAAAGCCGGTGTCTAGACCAGGATTCAAGAATGGTTCTTGTCAATGCATT  
GTACTTCAAGGGTCTTTGGGAGAAACAATTCAAGAAGGAAAACTCAAGACAAACCTTTCTATGTTACTG  
AAACAGAGACAAAGAATGTACGAATGATGCACATTAAGGATAAATTCGGTTATGGAGAATTTGAAGAATTA  
GATGCCAAGGCTGTAGAATTGCCCTACAGGAAGTCAAGATTTGGCCATGTTAATCATTTTTGCCAAACAGCAA  
AACTGGTCTCCCCGCTCTTGAAGAAAAATTACAAAATGTTGACTTGCAAAACTTGACTCAACGCATGTACT  
CTGTTGAAGTTATTTGGATCTGCCTAAATTCAGATTGAATCTGAAATTAATTTGAATGATCCTCTGAAA  
AAGTTGGGTATGTCTGATATGTTTGTTCCTGGAAAAGCTGATTTCAAAGGATTGCTTGAAGGATCTGATGA  
GATGTTATATATTTCTAAAGTAATTCAAAAAGCTTTCATTGAAGTAAATGAAGAAGGTGCTGAAGCTGCAG  
CTGCCACAGGCGTGTATGTTAATGATGCGTTGTATGCCAATGATGCCAATGGCCTTCAATGCTGAGCATCCA  
TTCCTGTACTTCTTACACAGCAAAAATTCGTTCTATTCAATGGTTCGTCTTGTAAACCAACAACCTGAATA  
A

Sequence of the primers used for cloning coding regions by RT-PCR:

Forward: 5'-CACCATGGCGGATCCCCAGGAATTGT-3'

Reverse: 5'-TTATTCAGTTGTTGGTTTAACT-3'

**Sequence ID: F4**

>gi|20502971|gb|AF503908.1| Ctenocephalides felis juvenile hormone  
epoxide hydrolase mRNA, complete cds

ATGGGTAAATGTTGTCGTATGCTCATTGCTGCAATAGCTGGTATAGCAGTGTGATTACCAAATTAC  
GAAAGAAGCTTCCAAAACCAAATATACCTCTCGACACTTGGTGGGGTCCAGGAAAGCCACAAAATGTTGACA  
TATCAATAAGACCGTTTTAAATTAATATTAATAACAAAGTGATTGAAAATCTGAAACTAAAACCAATGAT  
GTTCAATATACTTTACCTTTAGAGGGCATCAATTTTGAATATGGTTTTCAATACAGATTCCCTGAAAAAGAT  
TGTAGATTTTTGGCGAACTCAATATAATTGGCGTGAACGTGAAGCATTATTAATAAATATCCACACTTCA  
AAACAAATATTCAAGGCCTGGATATTCATTATGTCCACATAAAAACCACAGGTCTCTAAAAATATTGAAGTT  
TTGCCTTTGGTAATGATCCATGGTTGGCCAGGATCTTTTGTGGAATTCTACAAGATCATACTATGTTGAC  
AACTCCAAGAGCAGGTTACAATTTTCGTATTTCGAATTGATATTGCCTAGTATTCCCTGGATACGGCTTTTAC  
AGGCTGCAGCTAAACCTGGTCTTGGATCGACTCAGGTCGCCGTTATAATGCGCAATTTGATGGAGCGCATT  
GGATCAAAAAATATTATGTACAAGGAGGCGACTGGGGTTCTATGATCATAAGCGCGATGTCAACATTATT  
TCCAGAAAATGTCCTGGGACAGCACTCAAACATGTGTTTTGTCAATACTCCATCATCAAATATCAAGGCTA  
TAATTGGAAGCTTTTTCCCGGAATCGTTTTGCTGGCAGCGGAAATGCGCATAAAAATGTATCCCATGAGTGAA  
CACTTTTTTACACTTTTTGGAAGAAATGGGTTATTTGCATCTACAAGCTACCAAACCAGATACAGTGGGCGT  
TGCTTTAAGAGATTACCCAGCTGGTTTTAGCAGCTTATATTTTGGAGAAAATTTTCAACATGGACTAACAGAT  
CTTGGAGGTCAGTTAAAGATGGAACTTGCTGTTAAAATACAATATTCCTGAACTTTTAGACAATGTCATG  
ATATACTACGTTACTGATTCCATTACTACTTCAATGAGATTATATGCAGAATCATTACAAAAGCACACCT  
TGCTTTGAACTTAGATAGGGTGCACAATCATGTCCCAGCAGCCTGCGCAAAAATTTCCAAACGAGTTGGCTT  
ATGTGACCGATTGCCAATTTGCTGAGAAAATATAAACTTTATTGCAGTCCAATGACATGCCAAGTGGTGGC  
CATTTTGCAGCATTTGAGGAACCTGGTCTTTTAGCAGAAGACATTTTCACTGCGGTGAAAAAGTTTAAAGA  
ATTTTATTCCAAAAAGCTGAAAGCCAAAAGAAAGCTGATTTGTGA

Sequence of the primers used for cloning coding regions by RT-PCR:

Forward: 5'-CACCATGGGTAAATGTTGTCGTATGC-3'

Reverse: 5'-TCACAAATCAGCTTTCTTTTGG-3'

**Sequence ID: F5**

>De\_novo\_sequence\_assembly\_of\_Locus\_4025\_Transcript\_2/7|Locus\_18073\_Tra  
nscript\_1/1|Locus\_26648\_Transcript\_1/1|Q7KVA1|Xylosyltransferase\_oxt  
ATGAAATGTCCTGGAGATCCCAAAGAAATTTGTGGTGGCTTTTTTAAATGAACATATATGAAACAGGAAT  
TTCAAATTTCTCACCTCAAACGAGTAACTTTAACAACAAATGATACAGAACCTAAAGTACGCATTGTAT  
ATTTGCTGACTTTAAATGGACGAGCAGTACGTCAAGTTTACAGATTAATTAAGCTCTATTTTCATGTAGAT  
CATTATTTTTATATTACGTAGACTCTCGCCAAGATTACATGTTTCGTCAACTTTTGCAATTAGAAAATAA  
CTTTCCAAATATACGTCTTTCTCGCAATCGTTTTTCTACTATTTGGGGAGGTGCATCTTTACTCCAAATGT  
TGCTAGCTTCTATGAATGAACTGTTAAAATCTGATTGGAAGTGGGATTTTATTATAAATTTAAGTGAAGT  
GATTTTCCAATTAATCAAATGAAAGACTTGTGCAATTTTAAACAGCAAATAAAAAATAAAACTTTGTGAA  
ATCACATGGGCGAGAAGTACAAAGATTTATTACAGAAGCAAGGCTTAGACAAAACCTTTCATTGAATGTGATA  
CGCATATGTGGAGAAGTGGTATAGAACCTTGCCATGGGGTATTCAAATTTGATGGCGGTAGTGATTGGATA  
ACTCTGACTAGAGACTTTGTGAAATATATCACACAAGAACAAGATGCCCTTGTCAAGGGCCTAATGACTGT  
TTTTAGGCATACTTTATTACCTGCTGAATCATTTTTCCATACAGTTTTACGCAACTC

**Sequence ID: F6**

>De\_novo\_sequence\_assembly\_of\_Locus\_4149\_Transcript\_2/4\_Confidence\_0.70  
0\_Length\_2043|Q9VAF0|  
ATGAATTCCTCAATTTGGGAGTCAGACTCAGCCTTCAGATTTATTTACACTGATTTAGTTATGGAATACAT  
ACCAGAATATTTCAAAGACTGGCAATATCATCCATGGATTTTTTTCGGTCTTAGGTTCTATTTTAAATTGGAT  
TAAGTGGTGTGTTGCCTTTACTTATAATTCCATTGGAAGGAGGAGAACATTTTTAAAGTGGAGGAGGGGGC  
AAACTTTTTGCGCGTATTGCTCAGTTTTGTCAGTAGGAGGCTGCTCGGAGATGTGTTTTTGCATTTGTTGCC  
AGAAGCATGGGAGAAGTACAGTAACAAAGGAGAGCGACTCGTAGTCATGTACGAATTCGTAGATTCCAGGAG  
GAGGTAGTCCATCAATGACATGCGGGTGTGGGATTAGCTGGCCTCTTGTATTTCACGATGGTTCGAGAAG  
TTATTTGCTGGTTACATGGAAGATGATGACGTTTCCGAGGAAAAGACCGAACGAAAGCGCAAGAAAATGTC  
TAAAATTAATTTGTTTATAAAGAACAACAATGTCTTGAGGGCTAGAAAACGAAAATGGACGATTCTCGACCA  
GCAAATGCTCAGGCGGACAAAATGGAAAATGTGTGACATTGAAGTTATAAATGGAGCTATCAAAAACGGC  
TGTTGTATGGTTCGAGGAGCTAGAGAAAAGAGGCTGTGAGCAACAAGTCTAAGCATGTTTCTGGATACTTAAA  
TCTCATGGCAAACCAATTGATAATTTACACACGGTCTTGCTGTTGGTGGTCTTTTCATTGTTTCATTCA  
AACTAGGAATTTTAAACAACATTTCGAATTTCTAGTGCATGAGATTCCACACGAAGTGGGCGATTTTGCATTT

TTGTTGCGGTCAGGTTTCTCGCGGTGGGACGCGGCTCGAGCGCAACTCATGACCGCTGGCGCCGGCCTGCT  
TGGAGCTATGACCGCAATCGGCGGAAGTCGGGCTACGAGTGCAATGGAAGCTAGAACATGCTGGATAATGC  
CCTTCACAGCCGGCGGATTTCTCCACATAAGTTTAGTTACAGTGCTACCTGACTTGCTGCAAGAAAGGGAT  
CCAAAAGAGTCGATTAAACAATTTGGAGCATTGATTGGTGGTATAGTTCTAATGGCATCATTGACCACATT  
ATTGGAGTGA

**Additional file 2. Dataset 3. De novo sequence assembly process for sequences F5 and F6.**

**De novo sequence assembly for sequence F5: *Drosophila melanogaster* Xylosyltransferase (oxt) Q7KVA1.**

1. Protein oriented transcripts for Q7KVA1.

>Locus\_167\_Transcript\_1/1\_Confidence\_1.000\_Length\_302|Q7KVA1|Xylosyltransferase\_oxt

TTAACAGCAAATAAAAAATAAAAACTTTGTGAAATCACATGGGCGAGAAGTACAAAGATTT  
ATTCAGAAGCAAGGCTTAGACAAAACCTTCATTGAATGTGATACGCATATGTGGAGAACA  
GGTGATAGAACATTGCCATGGGGTATTCAAATTGATGGCGGTAGTGATTGGATAACTCTG  
ACTAGAGAGTTTGTGAAATATATCACACAAGAACAAGATGCCCTTGTCAAGGGCCTAATG  
ACTGTTTTTAGGCATACTTTATTACCTGCTGAATCATTTTTCCATACAGTTTTACGCAAC  
TC

>Locus\_4025\_Transcript\_1/7\_Confidence\_0.188\_Length\_245|Q7KVA1|Xylosyltransferase\_oxt

GAACCTAAAGTGCGCATTGTATATTTGCTAACTTTAAATGGGCGAGCAGTACGTCAAGTT  
TACAGATTAATTAAGCTCTATTTTCATGTAGATCATTATTTTTATATTCACGTAGACTCT  
CGCCAAGATTACATGTTTCGTCAACTTTTGCAATTAGAAAATAACTTTCCAAATATACGT  
CTTTCTCGCAATCGTTTTTCTACTATTTGGGGAGGTGCATCTTTACTCCAAATGTTGCTA  
GCTTC

>Locus\_4025\_Transcript\_2/7\_Confidence\_0.312\_Length\_368|Q7KVA1|Xylosyltransferase\_oxt

AATATGAAATGTCCTGGAGATCCCAAAGAAATTTGTGGTGGCTTTTTTAAAATGAACATA  
TATGAAACAGGAATTTCAAATTTCTCACCTCAAACCTGCAGTAACTTTAACAACAAATGAT  
ACAGAACCTAAAGTACGCATTGTATATTTGCTGACTTTAAATGGACGAGCAGTACGTCAA  
GTTTACAGATTAATTAAGCTCTATTTTCATGTAGATCATTATTTTTATATTCACGTAGAC  
TCTCGCCAAGATTACATGTTTCGTCAACTTTTGCAATTAGAAAATAACTTTCCAAATATA  
CGTCTTTCTCGCAATCGTTTTTCTACTATTTGGGGAGGTGCATCTTTACTCCAAATGTTG  
CTAGCTTC

>Locus\_8527\_Transcript\_1/1\_Confidence\_1.000\_Length\_299|Q7KVA1|Xylosyltransferase\_oxt

TTTCCAAATATACGTCTTTCTCGCAATCGTTTTTCTACTATTTGGGGAGGTGCATCTTTA  
CTCCAAATGTTGCTAGCTTCTATGAATGAACTGTTAAAATCTGATTGGAAATGGGATTTT  
ATTATAAATTTAAGTGAAAGTGATTTTCCAATTAATCAAATGAAAGACTTGTGCAATTT  
TTAACAGCAAATAAAAAATAAAAACTTTGTGAAATCACATGGGCGAGAAGTACAAAGATTT  
ATTCAGAAGCAAGGCTTAGACAAAACCTTCATTGAATGTGATACGCATATGTGGAGAAC

>Locus\_18073\_Transcript\_1/1\_Confidence\_1.000\_Length\_299|Q7KVA1|Xylosyltransferase\_oxt

TTTCCAAATATACGTCTTTCTCGCAATCGTTTTTCTACTATTTGGGGAGGTGCATCTTTA  
CTCCAAATGTTGCTAGCTTCTATGAATGAACTGTTAAAATCTGATTGGAAGTGGGATTTT  
ATTATAAATTTAAGTGAAAGTGATTTTCCAATTAATCAAATGAAAGACTTGTGCAATTC  
TTAACAGCAAATAAAAAATAAAAACTTTGTGAAATCACATGGGCGAGAAGTACAAAGATTT  
ATTCAGAAGCAAGGCTTAGACAAAACCTTCATTGAATGTGATACGCATATGTGGAGAAC

>Locus\_26648\_Transcript\_1/1\_Confidence\_1.000\_Length\_302|Q7KVA1|Xylosyltransferase\_oxt

TTAACAGCAAATAAAAAATAAAAACTTTGTGAAATCACATGGGCGAGAAGTACAAAGATTT  
ATTCAGAAGCAAGGCTTAGACAAAACCTTCATTGAATGTGATACGCATATGTGGAGAAC  
GGTGATAGAACCTTGCCATGGGGTATTCAAATTGATGGCGGTAGTGATTGGATAACTCTG  
ACTAGAGACTTTGTGAAATATATCACACAAGAACAAGATGCCCTTGTCAAGGGCCTAATG

ACTGTTTTTAGGCATACTTTATTACCTGCTGAATCATTTTTCCATACAGTTTTACGCAAC  
TC

## 2. Assembly of the transcripts clustered by Q7KVA1.

### - Reference protein Q7KVA1:

```
>sp|Q7KVA1|XYLT_DROME Xylosyltransferase oxt OS=Drosophila melanogaster  
GN=oxt PE=2 SV=1  
MEQSVSARWLKRYRAFFLILLIVAIQLFLAYKSLDIVGGGSGSGFDAAEAPASPPPPHA  
QARVQPPARTKLTAAQLGFQPECDILAREAISALQRAKTKDCREHIAQIACAIQAGRFYA  
PQLRSSCPAGNHTANVSLGCFKDEKDRLLAGYYSSSKTSNSPAKCVLCLQSGYPYAGV  
QYGRECFCGYDPPPKASKLPDSSCNTKCLGNAKEICGGFYAMNIYETGIAKFTAQLAATT  
PSEETKRVRIAFLLTLNLRALRQVHRLKALYAPEHVYIYHVDERQDYLYRKLLELESKF  
PNIRLARKRFSTIWGASLLTMLLQCMEDLLQSNWHWDFVINLSESDFPVKTLDKLVDL  
SANPGRNFVKGHGRETQKFIQKQGLDKTFVECDTHMWRIGDRKLPAGIQVDGGSWDVALS  
RPFVGYVTHPREDELQALLKLFRTLLPAESFFHTVLRNTHKCHTSYVDNNLHVTNWKR  
KQGCKCQYKHVVWDWCGCSPNDFKPEDWPRLQATEQKSLFFARKFEPVINQAVLLQLEEWL  
YGPYTSEYANLHGYSLYHHEDVHSGDDLARSIGDSVMRLSARQAKLYPLELIELTHY  
LHRDQYKGFVRYRARGSTGKPLHLETRVRPTQQGKLARNARFSKRLRNFEVSTDFDQKE  
QIARNFGKLLGPDLLSYTLQANADSGAASHSYNLTLWIDPLGRLQDFNELHVEDST  
SDVINHSKTLKHPITPGIWTAKLIGRNSIYAQLKFLIAPLAYYKGYPLAKSSDAEALNA  
GLTVALPEDFEMPVEWQQHLQTDDEQFTMREESLAKGKMLGQELHSWIDGLVGGFFQLRE  
SCVVEADSEVSLPLCSDAPWSSLAPDPKSDVDALLK
```

### - Transcripts to be assembled (protein Q7KVA1):

```
>Locus_4025_Transcript_2/7_Confidence_0.312_Length_368|Q7KVA1|Xylosylt  
ransferase_oxt  
AATATGAAATGTCCTGGAGATCCCAAAGAAATTTGTGGTGGCTTTTTTAAAATGAACATA  
TATGAAACAGGAATTTCAAATTTCTCACCTCAAAGTGCAGTAACCTTTAACAACAAATGAT  
ACAGAACCTAAAGTACGCATTGTATATTTGCTGACTTTAAATGGACGAGCAGTACGTCAA  
GTTTACAGATTAATTAAGCTCTATTTTCATGTAGATCATTATTTTTATATTACGTAGAC  
TCTCGCCAAGATTACATGTTTCGTCAACTTTTGCAATTAGAAAATAACTTTCCAAATATA  
CGTCTTTCTCGCAATCGTTTTTCTACTATTTGGGGAGGTGCATCTTTACTCCAAATGTTG  
CTAGCTTC
```

```
>Locus_18073_Transcript_1/1_Confidence_1.000_Length_299|Q7KVA1|Xylosylt  
ransferase_oxt  
TTTCCAAATATACGTCTTTCTCGCAATCGTTTTTCTACTATTTGGGGAGGTGCATCTTTA  
CTCCAAATGTTGCTAGCTTCTATGAATGAACTGTTAAAATCTGATTGGAAGTGGGATTTT  
ATTATAAATTTAAGTGAAAGTGATTTTCCAATTAATCAAATGAAAGACTTGTGCAATTC  
TTAACAGCAAATAAAAAATAAAAACTTTGTGAAATCACATGGGCGAGAAGTACAAAGATTT  
ATTCAGAAGCAAGGCTTAGACAAAACCTTTCATTGAATGTGATACGCATATGTGGAGAAC
```

```
>Locus_26648_Transcript_1/1_Confidence_1.000_Length_302|Q7KVA1|Xylosylt  
ransferase_oxt  
TTAACAGCAAATAAAAAATAAAAACTTTGTGAAATCACATGGGCGAGAAGTACAAAGATTT  
ATTCAGAAGCAAGGCTTAGACAAAACCTTTCATTGAATGTGATACGCATATGTGGAGA  
GGTGATAGAACCTTGCCATGGGGTATTCAAATTTGATGGCGGTAGTGATTGGATAACTCTG  
ACTAGAGACTTTGTGAAATATATCACACAAGAACAAGATGCCCTTGTCAAGGGCCTAATG  
ACTGTTTTTAGGCATACTTTATTACCTGCTGAATCATTTTTCCATACAGTTTTACGCAAC  
TC
```

- Assembly of the three transcripts:

```
>Locus_4025_Transcript_2/7|Locus_18073_Transcript_1/1|Locus_26648_Transcript_1/1|Q7KVA1|Xylosyltransferase_oxt
AATATGAAATGTCCTGGAGATCCCAAAGAAATTTGTGGTGGCTTTTTTAAAATGAACATA
TATGAAACAGGAATTTCAAATTTCTCACCTCAAAGTGCAGTAACTTTAACAACAAATGAT
ACAGAACCTAAAGTACGCATTGTATATTTGCTGACTTTAAATGGACGAGCAGTACGTCAA
GTTTACAGATTAATTAAGCTCTATTTTCATGTAGATCATTATTTTTTATATTCACGTAGAC
TCTCGCCAAGATTACATGTTTCGTCAACTTTTGCAATTAGAAAATAACTTTCCAAATATA
CGTCTTTTCTCGCAATCGTTTTTCTACTATTTGGGGAGGTGCATCTTTACTCCAAATGTTG
CTAGCTTCTATGAATGAACTGTTAAAATCTGATTGGAAGTGGGATTTTATTATAAATTTA
AGTGAAGTGAATTTTCCAAATTAATCAAATGAAAGACTTGTGCAATTTTAAACAGCAAAT
AAAAATAAAAACTTTGTGAAATCACATGGGCGAGAAGTACAAAGATTTTATTCAGAAGCAA
GGCTTAGACAAAACCTTTCATTGAATGTGATACGCATATGTGGAGAACTGGTGATAGAACC
TTGCCATGGGGTATTCAAATTTGATGGCGGTAGTGATTGGATAACTCTGACTAGAGACTTT
GTGAAATATATCACACAAGAACAAGATGCCCTTGTCAAGGGCCTAATGACTGTTTTTAGG
CATACTTTATTACCTGCTGAATCATTTTTTCCATACAGTTTTTACGCAACTC
```

- Alignment of the protein encoded by assembled transcript to the reference protein Q7KVA1:

```
Query 205 NTKCLGNAKEICGGFYAMNIYETGIAKFTAQLAATTPSEETK-RVRI AFLLLTLNGRALRQ 263
      N KC G+ KEICGGF+ MNIYETGI+KF+ Q A T + +T+ +VRI +LLTLNGRA+RQ
Sbjct 1 NMKCPGDPKEICGGFFKMNIYETGISKFSQPQAVTLTTNDTEPKVRIVYLLTLNGRAVRQ 180

Query 264 VHRLLKALYAPEHVYIYHVDERQDYLYRKLLELESKFPNIRLARKRFSTIWGGASLLTML 323
      V+RL+KAL+ +H +YIHVD RQDY++R+LL+LE+ FPNIRL+R RFSTIWGGASLL ML
Sbjct 181 VYRLIKALFHDHYFYIHVDSRQDYMFRQLLQLENNFPNIRLSRNRFSSTIWGGASLLQML 360

Query 324 LQCMEDLLQSNWHWDFVINLSESDFPVKTLDKLVDFLSANPGRNFVKHGRETQKFIQKQ 383
      L M +LL+S+W WDF+INLSESDFP+K+ ++LV FL+AN +NFVK HGRE Q+FIQKQ
Sbjct 361 LASMNELLKSDWKWDFIINLSESDFPIKSNERLVQFLTANKKNFVKSHGREVQRFIQKQ 540

Query 384 GLDKTFVECDTHMWRIGDRKLPAGIQVDGGSWVALSRPFVGYVTHPREDELQALLKL 443
      GLDKTF+ECDTHMWR GDR LP GIQ+DGGSDW+ L+R FV Y+T +E D L++ L+ +
Sbjct 541 GLDKTFIECDTHMWRIGDRKLPAGIQVDGGSWVALSRPFVGYVTHPREDELQALLKL 714

Query 444 FRHTLLPAESFFHTVLRN 461
      FRHTLLPAESFFHTVLRN
Sbjct 715 FRHTLLPAESFFHTVLRN 768
```

- Translated assembled transcript for protein Q7KVA1:

```
NMKCPGDPKEICGGFFKMNIYETGISKFSQPQAVTLTTNDTEPKVRIVYLLTLNGRAVRQ
VYRLIKALFHDHYFYIHVDSRQDYMFRQLLQLENNFPNIRLSRNRFSSTIWGGASLLQML
```

LASMNELLKSDWKWDFIINLSEDFPIKSNERLVQFLTANKNKNFVKSHGREVQRFIQKQ  
GLDKTFIECDTHMWRRTGDRTLPWGIQIDGGSDWITLTRDFVKYITQEQLVKGMLMTVFR  
HTLLPAESFFHTVLRN

### 3. Sequence used for synthesis and expression.

ATGAAATGTCCTGGAGATCCCAAAGAAATTTGTGGTGGCTTTTTTAAAATGAACATATATGAAACAGG  
AATTTCAAATTTCTCACCTCAAACCTGCAGTAACTTTAACAACAAATGATACAGAACCTAAAGTACGCA  
TTGTATATTTGCTGACTTTAAATGGACGAGCAGTACGTCAGTTTACAGATTAATTAAGCTCTATTT  
CATGTAGATCATTATTTTTATATTACGTAGACTCTCGCCAAGATTACATGTTTCGTCAACTTTTGCA  
ATTAGAAAATAACTTTCCAAATATACGTCTTTCTCGCAATCGTTTTTCTACTATTTGGGGAGGTGCAT  
CTTTACTCCAAATGTTGCTAGCTTCTATGAATGAACTGTTAAAATCTGATTGGAAGTGGGATTTTATT  
ATAAATTTAAGTGAAAGTGATTTTCCAATTAATCAAATGAAAGACTTGTGCAATTCTTAACAGCAAA  
TAAAAATAAAACTTTGTGAAATCACATGGGCGAGAAGTACAAAGATTTATTTCAGAAGCAAGGCTTAG  
ACAAAACCTTTCATTGAATGTGATACGCATATGTGGAGAAGTGGTGATAGAACCTTGCCATGGGGTATT  
CAAATTTGATGGCGGTAGTGATTGGATAACTCTGACTAGAGACTTTGTGAAATATATCACACAAGAACA  
AGATGCCCTTGTCAAGGGCCTAATGACTGTTTTTAGGCATACTTTATTACCTGCTGAATCATTTTTCC  
ATACAGTTTTACGCAACTC

### **De novo sequence assembly for sequence F5: *Drosophila melanogaster* Metal ion transporter Q9VAF0.**

#### 1. Protein oriented transcripts for Q9VAF0.

>Locus\_4149\_Transcript\_1/4\_Confidence\_0.600\_Length\_1883|Q9VAF0|  
CTTTCCTTCCCGTGTCTATGATAGACTAACTCCGACTTCGTATGCGCAGGCTCGACACGA  
CGGACGTATTTCGCATTTCGCACGATCTACGAACCAACTGACATAGTAGTACAGCGGGTGAC  
AGTCGTCGTAACCGTAGAATAATGCGTTACAATTTTCGATCTGAAGTGGACAATGACTTC  
AATAATTTATAACATCAAAGCTTCTGCACGACCATAAATTGATTTTAAATCTTTTTAAATGA  
TTTTCGTTAACGCTAGCTCAATCTCAGTGCAGATTAGCTAGTCGAACGTCGAATCTTCCCA  
AGAAAAACGGCTTGTGTTTCTATTGGATTCAATTTGTTTTATGGATTTTGATGCAACATAA  
ACGGTGTATTGTAAAAACCTGATGATAAAACAAGTATTTTTAAATAATAATTACGTTACG  
TTATTTGTGATAGAGAGTGAAAGTAGTGGCAATGAATTCCTCAATTTGGGAGTCAGACTC  
AGCCTTCAGATTTATTTACTGATTTAGTTATGGAATACATACCAGAATATTTCAAAGA  
CTGGCAATATCATCCATGGATTTTTTCGGTCTTAGGTTCTATTTTAAATTGGATTAAGTGG  
TGTGTTGCCCTTTACTTATAATTCATTGGAAGGAGGAGAACATTTTAAAAGTGGAGGAGG  
GGGCAAACCTTTGCGCGTATTGCTCAGTTTTGCAGTAGGAGGTCTGCTCGGAGATGTGTT  
TTTGCATTTGTTGCCAGAAGCATGGGAGAAGTACAGTAACAAAGGAGAGCGACTCGTAGT  
CATGTACGAATTCGTAGATTTCAGGAGGAGGTAGTCCATCAATGACATGCGGGTGCTGGGT  
ATTAGCTGGCCTCTTGTTATTCACGATGGTCGAGAAGTTATTTGCTGGTTACATGGAAGA  
TGATGACGTTTCCGAGGAAAAGACCGAAGCAAGAAAGCGCAAGAAAATGTCTAAAATTAATTG  
TTTGATAAAGAACAACAATGTCTTGAGGGCTAGAAAACGAAAATGGACGATTCTCGACCAG  
CAAATGCTCAGGCGCAAAAATGGAAAATGTGTGACATTGAAGTTATAAATGGAGCTAT  
CAAAAACGGCTGTTGTATGGTTCGAGGAGCTAGAGAAAAGAGGCTGTGAGCAACAAGTCTAA  
GCATGTTTCTGGATACTTAAATCTCATGGCAAACCTCAATTGATAATTTACACACGGTCT  
TGCTGTTGGTGGTTCTTTTCATTGTTTCATTCAAACCTAGGAATTTTAAACAACATTTCGCAAT  
TCTAGTGCATGAGATTCCACACGAAGTGGGCGATTTTGCAATTTTGTGCGGTGAGGTTT  
CTCGCGGTGGGACGCGGCTCGAGCGCAACTCATGACCGCTGGCGCCGGCCTGCTTGGAGC  
TATGACCGCAATCGGCGGAAGTGGGCTACGAGTGCAATGGAAGCTAGAACATGCTGGAT  
AATGCCCTTCACAGCCGGCGGATTTCTCCACATAAGTTTAGTTACAGTGCTACCTGACTT  
GCTGCAAGAAAGGGATCCAAAAGAGTCGATTAACAATTTGGAGCATTGATTGGTGGTAT  
AGTTCTAATGGCATCATTGACCACATTATTGGAGTGAGGCATATATTTTTCTATTTCTAA



TTAGATTTTACATATCGGTGCCATCATCACATTAAGTCACTGTGATTTGACTAATATGAT  
ACAGACTTGGATGAAATAAAGTAAAAATAGGGAACCTATTTTACAAAGAAAACCTTATTGACA  
TAATTAGATTAATCTATTTTGTCTGTCCGGGAGAATTACTTACTTACTTACATATTATGG  
TTTTGAAAAGTAATTTCTCAAATAATGATATTTGTGCATGTAAATAGTTATATTTTTTAATA  
CTTGTTATATATATATATATATA

>Locus\_4149\_Transcript\_2/4\_Confidence\_0.700\_Length\_2043|Q9VAF0|

CTTTCCTTCCCGTGTCTATGATAGACTAACTCCGACTTCGTATGCGCAGGCTCGACACGA  
CGGACGTATTTCGCATTTCGCACGATCTACGAACCAACTGACATAGTAGTACAGCGGGTGC  
AGTCGTGCGTAAAACGTAGAATAATGCGTTACAATTTTCGATCTGAAGTGGACAATGACTTC  
AATAATTTATAACATCAAAGCTTCTGCACGACCATAAAATGATTTTAAATCTTTTAAATGA  
TTTTCGTTAACGCTAGCTCAATCTCAGTGCAGATTAGCTAGTCGAACGTCGAATCTTTCCCA  
AGAAAAACGGTGCAGACTATACGACGTTTTGATTTTTTTGTTTACTGCGCGTTCTATTGGTCC  
TTAAGTGACATTCTCAGATGTTTTTAATGTGATTTTTCTTGTGATATAAATGCGTGCTCAT  
ATCATTTGTGTTAATTTTTGAAATTAACGATTTTTTATTTTTCCGTTCCAGGCTTGTGTTTT  
TATTGGATTCAATTTGTTTTATGGATTTTTGATGCAACATAAACGGTGTATTGTA AAAACCT  
GATGATAAAAACAAGTATTTTTAAATAATAATTACGTTACGTTATTTGTGATAGAGAGTGA  
AAGTAGTGGCAATGAATTCCTCAATTTGGGAGTCAGACTCAGCCTTCAGATTTATTTACA  
CTGATTTAGTTATGGAATACATAACCAGAATATTTCAAAGACTGGCAATATCATCCATGGA  
TTTTTTCCGTTCTTAGGTTCTATTTTTAATTGGATTAAGTGGTGTGTTGCCTTTACTTATAA  
TTCCATTGGAAGGAGGAGAACATTTTTAAAAGTGGAGGAGGGGGCAAACCTTTTGCAGTAT  
TGCTCAGTTTTGCAGTAGGAGGTCTGCTCGGAGATGTGTTTTTGCATTTGTTGCCAGAAG  
CATGGGAGAACTACAGTAACAAAGGAGAGCGACTCGTAGTCATGTACGAATTCGTAGATT  
CAGGAGGAGGTAGTCCATCAATGACATGCGGGTGTGGGTATTAGCTGGCCTCTTGTTAT  
TCACGATGGTTCGAGAAGTTATTTGCTGGTTACATGGAAGATGATGACGTTTCCGAGGAAA  
AGACCGAACGAAAGCGCAAGAAAATGTCTAAAATTAATTGTTTGATAAAGAACAACAATG  
TCTTGAGGGCTAGAAAACGAAAATGGACGATTCTCGACCAGCAAATGCTCAGGCGGACAAA  
ATGGAAAAATGTGTGACATTGAAGTTATAAATGGAGCTATCAAAAACGGCTGTTGTATGG  
TCGAGGAGCTAGAGAAAAGAGGCTGTGAGCAACAAGTCTAAGCATGTTTCTGGATACTTAA  
ATCTCATGGCAAATCAATTTGATAAATTTACACACAGGTCTTGTCTGTTGGTGGTTCTTTCA  
TTGTTTTCAATCAAACCTAGGAATTTTTAAACAACATTCGCAATTCATAGTCATGAGATTCCAC  
ACGAAGTGGGCGATTTTTGCAATTTTTGTTGCGGTGAGTTTTCTCGCGGTGGGACGCGGCTC  
GAGCGCAACTCATGACCGCTGGCGCCGGCCTGCTTGGAGCTATGACCGCAATCGGCGGAA  
GTCGGGCTACGAGTGCAATGGAAGCTAGAACATGCTGGATAATGCCCTTCACAGCCGGCG  
GATTTCTCCACATAAGTTTAGTTACAGTGCTACCTGACTTGCTGCAAGAAAGGGATCCAA  
AAGAGTCGATTAACAATTTGGAGCATTGATTGGTGGTATAGTTCTAATGGCATCATTGA  
CCACATTATTGGAGTGAGGCATATATTTTTCTATTTCTAATTAGATTTACATATCGGTG  
CCATCATCACATTAAGTCACTGTGATTTGACTAATATGATACAGACTTGTGAAATAAAG  
TAAAAATAGGGAACCTATTTTACAAAGAAAACCTTATTGACATAATTAGATTAATCTATTTG  
ATCTGTCCGGGAGAATTACTTACTTACTTACATATTATGGTTTTGAAAAGTAATTTCTCAA  
ATAATGATATTTGTGCATGTAAATAGTTATATTTTTTAATACTTGTATATATATATATAT  
ATA

>Locus\_4149\_Transcript\_3/4\_Confidence\_0.600\_Length\_1932|Q9VAF0|

CTTTCCTTCCCGTGTCTATGATAGACTAACTCCGACTTCGTATGCGCAGGCTCGACACGA  
CGGACGTATTTCGCATTTCGCACGATCTACGAACCAACTGACATAGTAGTACAGCGGGTGC  
AGTCGTGCGTAAAACGTAGAATAATGCGTTACAATTTTCGATCTGAAGTGGACAATGACTTC  
AATAATTTATAACATCAAAGCTTCTGCACGACCATAAAATGATTTTAAATCTTTTAAATGA  
TTTTCGTTAACGCTAGCTCAATCTCAGTGCAGATTAGCTAGTCGAACGTCGAATCTTTCCCA  
AGAAAAACGGTGCAGACTATACGACGTTTTGATTTTTTTGTTTACTGCGCGTTCTATTGGTCC  
TTAAGTGACATTCTCAGATGTTTTTAATGCTTGTGTTTCTATTGGATTCATTTGTTTTAT  
GGATTTTTGATGCAACATAAACGGTGTATTGTA AAAACCTGATGATAAAAACAAGTATTTTT  
AAATAATAATTACGTTACGTTATTTGTGATAGAGAGTGAAGTAGTGGCAATGAATTCCT  
CAATTTGGGAGTCAGACTCAGCCTTCAGATTTATTTACACTGATTTAGTTATGGAATACA  
TACCAGAATATTTCAAAGACTGGCAATATCATCCATGGATTTTTTCCGTTCTTAGGTTCTA  
TTTTAATTGGATTAAGTGGTGTGTTGCCTTTACTTATAATTCCATTGGAAGGAGGAGAAC  
ATTTTAAAAGTGGAGGAGGGGGCAAACCTTTTGCAGTATTGCTCAGTTTTGCAGTAGGAG  
GTCTGCTCGGAGATGTGTTTTTGCATTTGTTGCCAGAAGCATGGGAGAACTACAGTAACA  
AAGGAGATTCAGGAGGAGGTAGTCCATCAATGACATGCGGGTGTGGGTATTAGCTGGCC

TCTTGTATTACGATGGTCGAGAAGTTATTTGCTGGTTACATGGAAGATGATGACGTTT  
CCGAGGAAAAGACCGAACGAAAGCGCAAGAAAATGTCTAAAATTAATTGTTTGATAAAGA  
ACAACAATGTCTTGAGGGCTAGAAACGAAAATGGACGATTCTCGACCAGCAAATGCTCAG  
GCGGACAAAATGGAAAATGTGTGACATTGAAGTTATAAATGGAGCTATCAAAAACGGCT  
GTTGTATGGTCGAGGAGCTAGAGAAAAGAGGCTGTGAGCAACAAGTCTAAGCATGTTTCTG  
GATACTTAAATCTCATGGCAAACCTCAATTGATAATTTACACACCGGTCTTGCTGTTGGTG  
GTTCTTTTCATTGTTTCATTCAAACCTAGGAATTTTAAACAACATTCGCAATTCTAGTGCATG  
AGATTCCACACGAAGTGGGCGATTTTGCAATTTTGTGCGGTGAGGTTTCTCGCGGTGGG  
ACGCGGCTCGAGCGCAACTCATGACCGCTGGCGCCGGCCTGCTTGGAGCTATGACCGCAA  
TCGGCGGAGTCGGGCTACGAGTGAATGGAAGCTAGAACATGCTGGATAATGCCCTTCA  
CAGCCGGCGGATTTCTCCACATAAGTTTAGTTACAGTGCTACCTGACTTGCTGCAAGAAA  
GGGATCCAAAAGAGTCGATTAACAATTTGGAGCATTGATTGGTGGTATAGTTCTAATGG  
CATCATTGACCACATTATTGGAGTGAGGCATATATTTTTCTATTTCTAATTAGATTTAC  
ATATCGGTGCCATCATCACATTAAGTCACTGTGATTTGACTAATATGATACAGACTTGAT  
GAAATAAAGTAAAAATAGGGAACATTTTTACAAAGAAAACCTTATTGACATAATTAGATTA  
ATCTATTTGATCTGTCCGGGAGAATTACTTACTTACTTACATATTATGGTTTTGAAAAGT  
AATTCTCAAATAATGATATTTGTGCATGTAAATAGTTATATTTTTAATACTTGTTATATA  
TATATATATATA

>Locus\_4149\_Transcript\_4/4\_Confidence\_0.600\_Length\_1962|Q9VAF0|  
CTTTCCTTCCCCTGTCTATGATAGACTAACTCCGACTTCGTATGCGCAGGCTCGACACGA  
CGGACGTATTCGCATTTCGCACGATCTACGAACCAACTGACATAGTAGTACAGCGGGTGAC  
AGTCGTCGTA AACGTTAGAATAATGCGTTACAATTTTCGATCTGAAGTGGACAATGACTTC  
AATAATTTATAACATCAAAGCTTCTGCACGACCATAAATTTGATTTTTAATCTTTTTAAATGA  
TTTTCGTTAACGCTAGCTCAATCTCAGTGCAGATTAGCTAGTTCGAACGTCGAATCTTCCCA  
AGAAAACGGTGCAGACTATACGACGTTTGTATTTTTGTTTACTGCGCGTTCTATTGGTCC  
TTAAGTGACATTCTCAGATGTTTTAATGCTTGTGTTTCTATTGGATTCAATTTGTTTTAT  
GGATTTTGATGCAACATAAACGGTGTATTGTA AAAACCTGATGATAAAAACAAGTATTTTT  
AAATAATAATTACGTTACGTTATTTGTGATAGAGAGTAAAAGTAGTGGCAATGAATTCCT  
CAATTTGGGAGTCAGACTCAGCCTTCAGATTTTATTACACTGATTTAGTTATGGAATACA  
TACCAGAATATTTCAAAGACTGGCAATATCATCCATGGATTTTTTCGGTCTTAGGTTCTA  
TTTTAATTGGATTAAGTGGTGTGTTGCCTTTACTTATAAATCCATTGGAAGGAGGAGAAC  
ATTTTTAAAAGTGGAGGAGGGGGCAAACTTTTGCGCGTATTGCTCAGTTTTGCAGTAGGAG  
GTCTGCTCGGAGATGTGTTTTTGCATTTGTTGCCAGAAGCATGGGAGA ACTACAGTAACA  
AAGGAGAGCGACTCGTAGTCATGTACGAATTCGTAGATTTCAGGAGGAGGTAGTCCATCAA  
TGACATGCGGGTGTGGGTATTAGCTGGCCTCTTGTATTACGATGGTCGAGAAGTTAT  
TTGCTGGTTACATGGAAGATGATGACGTTTCCGAGGAAAAGACCGAACGAAAGCGCAAGA  
AAATGTCTAAAATTAATTGTTTGATAAAGAACAACAATGTCTTGAGGGCTAGAAACGAAA  
ATGGACGATTCTCGACCAGCAAATGCTCAGGCGGACAAAATGGAAAATGTGTGACATTG  
AAGTTATAAATGGAGCTATCAAAAACGGCTGTTGTATGGTCGAGGAGCTAGAGAAAAGAGG  
CTGTGAGCAACAAGTCTAAGCATGTTTCTGGATACTTAAATCTCATGGCAAACCTCAATTG  
ATAATTTACACACCGGTCTTGCTGTTGGTGGTTCTTTTCATTGTTTCATTCAAACCTAGGAA  
TTTTAACAACATTCGCAATTCTAGTGCATGAGATTCCACACGAAGTGGGCGATTTTGCAA  
TTTTGTTGCGGTGAGGTTTCTCGCGGTGGGACGCGGCTCGAGCGCAACTCATGACCGCTG  
GCGCCGGCCTGCTTGGAGCTATGACCGCAATCGGCGGAAGTCCGGGCTACGAGTGAATGG  
AAGCTAGAACATGCTGGATAATGCCCTTCACAGCCGGCGGATTTCTCCACATAAGTTTAG  
TTACAGTGCTACCTGACTTGCTGCAAGAAAGGGATCCAAAAGAGTCGATTAACAATTTG  
GACATTGATTGGTGGTATAGTTCTAATGGCATCATTGACCACATTATTGGAGTGAGGCA  
TATATTTTTCTATTTCTAATTAGATTTTACATATCGGTGCCATCATCACATTAAGTCACT  
GTGATTTGACTAATATGATACAGACTTGATGAAATAAAGTAAAAATAGGGAACATTTTTA  
CAAAGAAAACCTTATTGACATAATTAGATTAATCTATTTGATCTGTCCGGGAGAATTACTT  
ACTTACTTACATATTATGGTTTTGAAAAGTAATTCTCAAATAATGATATTTGTGCATGTA  
AATAGTTATATTTTTAATACTTGTTATATATATATATATATA

2. Assembly of the transcripts clustered by Q9VAF0.

- Reference protein Q9VAF0:

```
>sp|Q9VAF0|Y816_DROME Uncharacterized protein CG7816 OS=Drosophila
melanogaster GN=CG7816 PE=2 SV=1
MTTNSFFDEHIAMIYNSLMDQYMPEYFKSFEYTPWVFSLLGSVIGLSGIFPLIIIPTE
EKMAKEGYKDPADSKLLRVLLSFAVGGLLDVFLHLLPEAWEGDNQDPSSHPSLRSLGWV
LSGILIFTIVEKIFSGYASADEENPQPKCVEIANCLLRRHGGQLPEGETSESCGGACDIE
DVGKVCFLREQEQKSKERKEQPKKVAGYLNLLANSIDNFTHGLAVAGSFLVSFRHGILAT
FAILLHEIPHEVGDFAILLRSGFSRWDAARAQLLTAGAGLLGALVAIGGSGVTSAMEART
SWIMPFTAGGFLHIALVTVLPDLLKEEERKESIKQLLLALVFGIALMAVMTMLFEH
```

- Transcripts to be assembled (protein Q9VAF0):

The four transcripts are very similar with some indels that could correspond to different isoforms. This is the alignment of all the transcripts clustered by the protein Q9VAF0:

CLUSTAL 2.1 multiple sequence alignment

```
Locus_4149_Transcript_3/4_Conf      CTTTCCTTCCCGTGTCTATGATAGACTAACTCCGACTTCGTATGCGCAGG
Locus_4149_Transcript_4/4_Conf      CTTTCCTTCCCGTGTCTATGATAGACTAACTCCGACTTCGTATGCGCAGG
Locus_4149_Transcript_1/4_Conf      CTTTCCTTCCCGTGTCTATGATAGACTAACTCCGACTTCGTATGCGCAGG
Locus_4149_Transcript_2/4_Conf      CTTTCCTTCCCGTGTCTATGATAGACTAACTCCGACTTCGTATGCGCAGG
*****
```

```
Locus_4149_Transcript_3/4_Conf      CTCGACACGACGGACGTATTCGCATTTCGCACGATCTACGAACCAACTGAC
Locus_4149_Transcript_4/4_Conf      CTCGACACGACGGACGTATTCGCATTTCGCACGATCTACGAACCAACTGAC
Locus_4149_Transcript_1/4_Conf      CTCGACACGACGGACGTATTCGCATTTCGCACGATCTACGAACCAACTGAC
Locus_4149_Transcript_2/4_Conf      CTCGACACGACGGACGTATTCGCATTTCGCACGATCTACGAACCAACTGAC
*****
```

```
Locus_4149_Transcript_3/4_Conf      ATAGTAGTACAGCGGGTGACAGTCGTCGTAAAACGTAGAATAATGCGTTA
Locus_4149_Transcript_4/4_Conf      ATAGTAGTACAGCGGGTGACAGTCGTCGTAAAACGTAGAATAATGCGTTA
Locus_4149_Transcript_1/4_Conf      ATAGTAGTACAGCGGGTGACAGTCGTCGTAAAACGTAGAATAATGCGTTA
Locus_4149_Transcript_2/4_Conf      ATAGTAGTACAGCGGGTGACAGTCGTCGTAAAACGTAGAATAATGCGTTA
*****
```

```
Locus_4149_Transcript_3/4_Conf      CAATTTTCGATCTGAAGTGGACAATGACTTCAATAATTTATAACATCAAAG
Locus_4149_Transcript_4/4_Conf      CAATTTTCGATCTGAAGTGGACAATGACTTCAATAATTTATAACATCAAAG
Locus_4149_Transcript_1/4_Conf      CAATTTTCGATCTGAAGTGGACAATGACTTCAATAATTTATAACATCAAAG
Locus_4149_Transcript_2/4_Conf      CAATTTTCGATCTGAAGTGGACAATGACTTCAATAATTTATAACATCAAAG
*****
```

```
Locus_4149_Transcript_3/4_Conf      CTTCTGCACGACCATAAATTGATTTTAAATCTTTTAAATGATTCGTTAAC
Locus_4149_Transcript_4/4_Conf      CTTCTGCACGACCATAAATTGATTTTAAATCTTTTAAATGATTCGTTAAC
Locus_4149_Transcript_1/4_Conf      CTTCTGCACGACCATAAATTGATTTTAAATCTTTTAAATGATTCGTTAAC
Locus_4149_Transcript_2/4_Conf      CTTCTGCACGACCATAAATTGATTTTAAATCTTTTAAATGATTCGTTAAC
*****
```

```
Locus_4149_Transcript_3/4_Conf      GCTAGCTCAATCTCAGTGCAGATTAGCTAGTCGAACGTCGAATCTTCCCA
Locus_4149_Transcript_4/4_Conf      GCTAGCTCAATCTCAGTGCAGATTAGCTAGTCGAACGTCGAATCTTCCCA
Locus_4149_Transcript_1/4_Conf      GCTAGCTCAATCTCAGTGCAGATTAGCTAGTCGAACGTCGAATCTTCCCA
Locus_4149_Transcript_2/4_Conf      GCTAGCTCAATCTCAGTGCAGATTAGCTAGTCGAACGTCGAATCTTCCCA
*****
```

```
Locus_4149_Transcript_3/4_Conf      AGAAAAACGGTGCAGCTATACGACGTTTGTATTTTTGTTTACTGCGGTT
Locus_4149_Transcript_4/4_Conf      AGAAAAACGGTGCAGCTATACGACGTTTGTATTTTTGTTTACTGCGGTT
Locus_4149_Transcript_1/4_Conf      AGAAAAACG-----
Locus_4149_Transcript_2/4_Conf      AGAAAAACGGTGCAGCTATACGACGTTTGTATTTTTGTTTACTGCGGTT
*****
```

```
Locus_4149_Transcript_3/4_Conf      CTATTGGTCCTTAAGTGCATTTCTCAGATGTTTTTAATG-----
Locus_4149_Transcript_4/4_Conf      CTATTGGTCCTTAAGTGCATTTCTCAGATGTTTTTAATG-----
```

```

Locus_4149_Transcript_1/4_Conf -----
Locus_4149_Transcript_2/4_Conf CTATTGGTCCTAAGTGACATTCTCAGATGTTTTTAATGTGATTTTCTTG

Locus_4149_Transcript_3/4_Conf -----
Locus_4149_Transcript_4/4_Conf -----
Locus_4149_Transcript_1/4_Conf -----
Locus_4149_Transcript_2/4_Conf TGATATAAATGCGTGCATATCATTGTGTAAATTTGAAATTAACGAT

Locus_4149_Transcript_3/4_Conf -----CTGTGTTTCTATTGGATTCAATTTGTTTTA
Locus_4149_Transcript_4/4_Conf -----CTGTGTTTCTATTGGATTCAATTTGTTTTA
Locus_4149_Transcript_1/4_Conf -----GCTGTGTTTCTATTGGATTCAATTTGTTTTA
Locus_4149_Transcript_2/4_Conf TTTTTATTTTCCGTTCCAGGCTTGTGTTTCTATTGGATTCAATTTGTTTTA
*****

Locus_4149_Transcript_3/4_Conf TGGATTTTGATGCAACATAAACGGTGTATTGTAAAAACCTGATGATAAAA
Locus_4149_Transcript_4/4_Conf TGGATTTTGATGCAACATAAACGGTGTATTGTAAAAACCTGATGATAAAA
Locus_4149_Transcript_1/4_Conf TGGATTTTGATGCAACATAAACGGTGTATTGTAAAAACCTGATGATAAAA
Locus_4149_Transcript_2/4_Conf TGGATTTTGATGCAACATAAACGGTGTATTGTAAAAACCTGATGATAAAA
*****

Locus_4149_Transcript_3/4_Conf CAAGTATTTTTAAATAATAATTACGTTACGTTATTTGTGATAGAGAGTGA
Locus_4149_Transcript_4/4_Conf CAAGTATTTTTAAATAATAATTACGTTACGTTATTTGTGATAGAGAGTGA
Locus_4149_Transcript_1/4_Conf CAAGTATTTTTAAATAATAATTACGTTACGTTATTTGTGATAGAGAGTGA
Locus_4149_Transcript_2/4_Conf CAAGTATTTTTAAATAATAATTACGTTACGTTATTTGTGATAGAGAGTGA
*****

Locus_4149_Transcript_3/4_Conf AAGTAGTGGCAATGAATTCCTCAATTTGGGAGTCAGACTCAGCCTTCAGA
Locus_4149_Transcript_4/4_Conf AAGTAGTGGCAATGAATTCCTCAATTTGGGAGTCAGACTCAGCCTTCAGA
Locus_4149_Transcript_1/4_Conf AAGTAGTGGCAATGAATTCCTCAATTTGGGAGTCAGACTCAGCCTTCAGA
Locus_4149_Transcript_2/4_Conf AAGTAGTGGCAATGAATTCCTCAATTTGGGAGTCAGACTCAGCCTTCAGA
*****

Locus_4149_Transcript_3/4_Conf TTTATTTACACIGATTTAGTTATGGAATACATACCAGAATATTTCAAAGA
Locus_4149_Transcript_4/4_Conf TTTATTTACACIGATTTAGTTATGGAATACATACCAGAATATTTCAAAGA
Locus_4149_Transcript_1/4_Conf TTTATTTACACIGATTTAGTTATGGAATACATACCAGAATATTTCAAAGA
Locus_4149_Transcript_2/4_Conf TTTATTTACACIGATTTAGTTATGGAATACATACCAGAATATTTCAAAGA
*****

Locus_4149_Transcript_3/4_Conf CTGGCAATATCATCCATGGATTTTTTCGGTCTTAGGTTCTATTTTAAATG
Locus_4149_Transcript_4/4_Conf CTGGCAATATCATCCATGGATTTTTTCGGTCTTAGGTTCTATTTTAAATG
Locus_4149_Transcript_1/4_Conf CTGGCAATATCATCCATGGATTTTTTCGGTCTTAGGTTCTATTTTAAATG
Locus_4149_Transcript_2/4_Conf CTGGCAATATCATCCATGGATTTTTTCGGTCTTAGGTTCTATTTTAAATG
*****

Locus_4149_Transcript_3/4_Conf GATTAAGTGGTGTGTTGCCTTTACTTATAATTCATTGGAAGGAGGAGAA
Locus_4149_Transcript_4/4_Conf GATTAAGTGGTGTGTTGCCTTTACTTATAATTCATTGGAAGGAGGAGAA
Locus_4149_Transcript_1/4_Conf GATTAAGTGGTGTGTTGCCTTTACTTATAATTCATTGGAAGGAGGAGAA
Locus_4149_Transcript_2/4_Conf GATTAAGTGGTGTGTTGCCTTTACTTATAATTCATTGGAAGGAGGAGAA
*****

Locus_4149_Transcript_3/4_Conf CATTTTAAAAGTGGAGGAGGGGGCAAACCTTTGCGCGTATTGCTCAGTTT
Locus_4149_Transcript_4/4_Conf CATTTTAAAAGTGGAGGAGGGGGCAAACCTTTGCGCGTATTGCTCAGTTT
Locus_4149_Transcript_1/4_Conf CATTTTAAAAGTGGAGGAGGGGGCAAACCTTTGCGCGTATTGCTCAGTTT
Locus_4149_Transcript_2/4_Conf CATTTTAAAAGTGGAGGAGGGGGCAAACCTTTGCGCGTATTGCTCAGTTT
*****

Locus_4149_Transcript_3/4_Conf TGCAGTAGGAGGTCTGCTCGGAGATGTGTTTTTGCATTTGTTGCCAGAAG
Locus_4149_Transcript_4/4_Conf TGCAGTAGGAGGTCTGCTCGGAGATGTGTTTTTGCATTTGTTGCCAGAAG
Locus_4149_Transcript_1/4_Conf TGCAGTAGGAGGTCTGCTCGGAGATGTGTTTTTGCATTTGTTGCCAGAAG
Locus_4149_Transcript_2/4_Conf TGCAGTAGGAGGTCTGCTCGGAGATGTGTTTTTGCATTTGTTGCCAGAAG
*****

Locus_4149_Transcript_3/4_Conf CATGGGAGAACACAGTAACAAAG-----
Locus_4149_Transcript_4/4_Conf CATGGGAGAACACAGTAACAAAGGAGAGCGACTCGTAGTCATGTACGAA
Locus_4149_Transcript_1/4_Conf CATGGGAGAACACAGTAACAAAGGAGAGCGACTCGTAGTCATGTACGAA
Locus_4149_Transcript_2/4_Conf CATGGGAGAACACAGTAACAAAGGAGAGCGACTCGTAGTCATGTACGAA
*****

Locus_4149_Transcript_3/4_Conf ----GAGATTCAGGAGGAGGTAGTCCATCAATGACATGCGGGTGTGGGT

```

|                                |                                                               |
|--------------------------------|---------------------------------------------------------------|
| Locus_4149_Transcript_4/4_Conf | TTCGTAGATTCAGGAGGAGGTAGTCCATCAATGACATGCGGGTGCTGGGT            |
| Locus_4149_Transcript_1/4_Conf | TTCGTAGATTCAGGAGGAGGTAGTCCATCAATGACATGCGGGTGCTGGGT            |
| Locus_4149_Transcript_2/4_Conf | TTCGTAGATTCAGGAGGAGGTAGTCCATCAATGACATGCGGGTGCTGGGT<br>*****   |
| Locus_4149_Transcript_3/4_Conf | ATTAGCTGGCCTCTTGTATTACGATGGTCGAGAAGTTATTTGCTGGTT              |
| Locus_4149_Transcript_4/4_Conf | ATTAGCTGGCCTCTTGTATTACGATGGTCGAGAAGTTATTTGCTGGTT              |
| Locus_4149_Transcript_1/4_Conf | ATTAGCTGGCCTCTTGTATTACGATGGTCGAGAAGTTATTTGCTGGTT              |
| Locus_4149_Transcript_2/4_Conf | ATTAGCTGGCCTCTTGTATTACGATGGTCGAGAAGTTATTTGCTGGTT<br>*****     |
| Locus_4149_Transcript_3/4_Conf | ACATGGAAGATGATGACGTTTCCGAGGAAAAGACCGAACGAAAGCGCAAG            |
| Locus_4149_Transcript_4/4_Conf | ACATGGAAGATGATGACGTTTCCGAGGAAAAGACCGAACGAAAGCGCAAG            |
| Locus_4149_Transcript_1/4_Conf | ACATGGAAGATGATGACGTTTCCGAGGAAAAGACCGAACGAAAGCGCAAG            |
| Locus_4149_Transcript_2/4_Conf | ACATGGAAGATGATGACGTTTCCGAGGAAAAGACCGAACGAAAGCGCAAG<br>*****   |
| Locus_4149_Transcript_3/4_Conf | AAAATGCTAAAAATTAATTGTTTGATAAAGAACAACAATGTCTTGAGGGC            |
| Locus_4149_Transcript_4/4_Conf | AAAATGCTAAAAATTAATTGTTTGATAAAGAACAACAATGTCTTGAGGGC            |
| Locus_4149_Transcript_1/4_Conf | AAAATGCTAAAAATTAATTGTTTGATAAAGAACAACAATGTCTTGAGGGC            |
| Locus_4149_Transcript_2/4_Conf | AAAATGCTAAAAATTAATTGTTTGATAAAGAACAACAATGTCTTGAGGGC<br>*****   |
| Locus_4149_Transcript_3/4_Conf | TAGAAACGAAAATGGACGATTCTCGACCAGCAAATGCTCAGCGGACAAA             |
| Locus_4149_Transcript_4/4_Conf | TAGAAACGAAAATGGACGATTCTCGACCAGCAAATGCTCAGCGGACAAA             |
| Locus_4149_Transcript_1/4_Conf | TAGAAACGAAAATGGACGATTCTCGACCAGCAAATGCTCAGCGGACAAA             |
| Locus_4149_Transcript_2/4_Conf | TAGAAACGAAAATGGACGATTCTCGACCAGCAAATGCTCAGCGGACAAA<br>*****    |
| Locus_4149_Transcript_3/4_Conf | ATGGAAAAATGTTGACATTGAAGTTATAAATGGAGCTATCAAAAACGGC             |
| Locus_4149_Transcript_4/4_Conf | ATGGAAAAATGTTGACATTGAAGTTATAAATGGAGCTATCAAAAACGGC             |
| Locus_4149_Transcript_1/4_Conf | ATGGAAAAATGTTGACATTGAAGTTATAAATGGAGCTATCAAAAACGGC             |
| Locus_4149_Transcript_2/4_Conf | ATGGAAAAATGTTGACATTGAAGTTATAAATGGAGCTATCAAAAACGGC<br>*****    |
| Locus_4149_Transcript_3/4_Conf | TGTTGTATGGTCGAGGAGCTAGAGAAAGAGGCTGTGAGCAACAAGTCTAA            |
| Locus_4149_Transcript_4/4_Conf | TGTTGTATGGTCGAGGAGCTAGAGAAAGAGGCTGTGAGCAACAAGTCTAA            |
| Locus_4149_Transcript_1/4_Conf | TGTTGTATGGTCGAGGAGCTAGAGAAAGAGGCTGTGAGCAACAAGTCTAA            |
| Locus_4149_Transcript_2/4_Conf | TGTTGTATGGTCGAGGAGCTAGAGAAAGAGGCTGTGAGCAACAAGTCTAA<br>*****   |
| Locus_4149_Transcript_3/4_Conf | GCATGTTTCTGGATACTTAAATCTCATGGCAAACCTCAATTGATAATTTCA           |
| Locus_4149_Transcript_4/4_Conf | GCATGTTTCTGGATACTTAAATCTCATGGCAAACCTCAATTGATAATTTCA           |
| Locus_4149_Transcript_1/4_Conf | GCATGTTTCTGGATACTTAAATCTCATGGCAAACCTCAATTGATAATTTCA           |
| Locus_4149_Transcript_2/4_Conf | GCATGTTTCTGGATACTTAAATCTCATGGCAAACCTCAATTGATAATTTCA<br>*****  |
| Locus_4149_Transcript_3/4_Conf | CACACGGTCTTGCTGTTGGTGGTTCTTTTCATTGTTTCATTCAAACCTAGGA          |
| Locus_4149_Transcript_4/4_Conf | CACACGGTCTTGCTGTTGGTGGTTCTTTTCATTGTTTCATTCAAACCTAGGA          |
| Locus_4149_Transcript_1/4_Conf | CACACGGTCTTGCTGTTGGTGGTTCTTTTCATTGTTTCATTCAAACCTAGGA          |
| Locus_4149_Transcript_2/4_Conf | CACACGGTCTTGCTGTTGGTGGTTCTTTTCATTGTTTCATTCAAACCTAGGA<br>***** |
| Locus_4149_Transcript_3/4_Conf | ATTTTAACAACATTCGCAATTCAGTGCATGAGATTCACACGAAAGTGGG             |
| Locus_4149_Transcript_4/4_Conf | ATTTTAACAACATTCGCAATTCAGTGCATGAGATTCACACGAAAGTGGG             |
| Locus_4149_Transcript_1/4_Conf | ATTTTAACAACATTCGCAATTCAGTGCATGAGATTCACACGAAAGTGGG             |
| Locus_4149_Transcript_2/4_Conf | ATTTTAACAACATTCGCAATTCAGTGCATGAGATTCACACGAAAGTGGG<br>*****    |
| Locus_4149_Transcript_3/4_Conf | CGATTTTGCAATTTTGTGCGGTCAGGTTTCTCGCGGTGGGACGCGGCTC             |
| Locus_4149_Transcript_4/4_Conf | CGATTTTGCAATTTTGTGCGGTCAGGTTTCTCGCGGTGGGACGCGGCTC             |
| Locus_4149_Transcript_1/4_Conf | CGATTTTGCAATTTTGTGCGGTCAGGTTTCTCGCGGTGGGACGCGGCTC             |
| Locus_4149_Transcript_2/4_Conf | CGATTTTGCAATTTTGTGCGGTCAGGTTTCTCGCGGTGGGACGCGGCTC<br>*****    |
| Locus_4149_Transcript_3/4_Conf | GAGCGCAACTCATGACCGCTGGCGCCGGCCTGCTTGAGACTATGACCGCA            |
| Locus_4149_Transcript_4/4_Conf | GAGCGCAACTCATGACCGCTGGCGCCGGCCTGCTTGAGACTATGACCGCA            |
| Locus_4149_Transcript_1/4_Conf | GAGCGCAACTCATGACCGCTGGCGCCGGCCTGCTTGAGACTATGACCGCA            |
| Locus_4149_Transcript_2/4_Conf | GAGCGCAACTCATGACCGCTGGCGCCGGCCTGCTTGAGACTATGACCGCA<br>*****   |

```

Locus_4149_Transcript_3/4_Conf      ATCGGGCGAAGTCGGGCTACGAGTGC AATGGAAGCTAGAACATGCTGGAT
Locus_4149_Transcript_4/4_Conf      ATCGGGCGAAGTCGGGCTACGAGTGC AATGGAAGCTAGAACATGCTGGAT
Locus_4149_Transcript_1/4_Conf      ATCGGGCGAAGTCGGGCTACGAGTGC AATGGAAGCTAGAACATGCTGGAT
Locus_4149_Transcript_2/4_Conf      ATCGGGCGAAGTCGGGCTACGAGTGC AATGGAAGCTAGAACATGCTGGAT
*****

Locus_4149_Transcript_3/4_Conf      AATGCCCTTACAGCCGGCGGATTTCTCCACATAAGTTTAGTTACAGTGC
Locus_4149_Transcript_4/4_Conf      AATGCCCTTACAGCCGGCGGATTTCTCCACATAAGTTTAGTTACAGTGC
Locus_4149_Transcript_1/4_Conf      AATGCCCTTACAGCCGGCGGATTTCTCCACATAAGTTTAGTTACAGTGC
Locus_4149_Transcript_2/4_Conf      AATGCCCTTACAGCCGGCGGATTTCTCCACATAAGTTTAGTTACAGTGC
*****

Locus_4149_Transcript_3/4_Conf      TACCTGACTTGCTGCAAGAAAGGGATCCAAAAGAGTCGATTAACAATTT
Locus_4149_Transcript_4/4_Conf      TACCTGACTTGCTGCAAGAAAGGGATCCAAAAGAGTCGATTAACAATTT
Locus_4149_Transcript_1/4_Conf      TACCTGACTTGCTGCAAGAAAGGGATCCAAAAGAGTCGATTAACAATTT
Locus_4149_Transcript_2/4_Conf      TACCTGACTTGCTGCAAGAAAGGGATCCAAAAGAGTCGATTAACAATTT
*****

Locus_4149_Transcript_3/4_Conf      GGAGCATTGATTGGTGGTATAGTTCTAATGGCATCATTGACCACATTATT
Locus_4149_Transcript_4/4_Conf      GGAGCATTGATTGGTGGTATAGTTCTAATGGCATCATTGACCACATTATT
Locus_4149_Transcript_1/4_Conf      GGAGCATTGATTGGTGGTATAGTTCTAATGGCATCATTGACCACATTATT
Locus_4149_Transcript_2/4_Conf      GGAGCATTGATTGGTGGTATAGTTCTAATGGCATCATTGACCACATTATT
*****

Locus_4149_Transcript_3/4_Conf      GGAGTGAGGCATATATTTTTCTATTTCTAATTAGATTTACATATCGGTG
Locus_4149_Transcript_4/4_Conf      GGAGTGAGGCATATATTTTTCTATTTCTAATTAGATTTACATATCGGTG
Locus_4149_Transcript_1/4_Conf      GGAGTGAGGCATATATTTTTCTATTTCTAATTAGATTTACATATCGGTG
Locus_4149_Transcript_2/4_Conf      GGAGTGAGGCATATATTTTTCTATTTCTAATTAGATTTACATATCGGTG
*****

Locus_4149_Transcript_3/4_Conf      CCATCATCACATTAAGTCACTGTGATTTGACTAATATGATACAGACTTGA
Locus_4149_Transcript_4/4_Conf      CCATCATCACATTAAGTCACTGTGATTTGACTAATATGATACAGACTTGA
Locus_4149_Transcript_1/4_Conf      CCATCATCACATTAAGTCACTGTGATTTGACTAATATGATACAGACTTGA
Locus_4149_Transcript_2/4_Conf      CCATCATCACATTAAGTCACTGTGATTTGACTAATATGATACAGACTTGA
*****

Locus_4149_Transcript_3/4_Conf      TGAAATAAAGTAAAAATAGGGAAC TATTTTACAAGAAAAC TATTGACA
Locus_4149_Transcript_4/4_Conf      TGAAATAAAGTAAAAATAGGGAAC TATTTTACAAGAAAAC TATTGACA
Locus_4149_Transcript_1/4_Conf      TGAAATAAAGTAAAAATAGGGAAC TATTTTACAAGAAAAC TATTGACA
Locus_4149_Transcript_2/4_Conf      TGAAATAAAGTAAAAATAGGGAAC TATTTTACAAGAAAAC TATTGACA
*****

Locus_4149_Transcript_3/4_Conf      TAATTAGATTAATCTATTTGATCTGTCCGGGAGAATTACTTACTTACTTA
Locus_4149_Transcript_4/4_Conf      TAATTAGATTAATCTATTTGATCTGTCCGGGAGAATTACTTACTTACTTA
Locus_4149_Transcript_1/4_Conf      TAATTAGATTAATCTATTTGATCTGTCCGGGAGAATTACTTACTTACTTA
Locus_4149_Transcript_2/4_Conf      TAATTAGATTAATCTATTTGATCTGTCCGGGAGAATTACTTACTTACTTA
*****

Locus_4149_Transcript_3/4_Conf      CATATTATGGTTTTGAAAAGTAATTC TCAAATAATGATATTTGTGCATGT
Locus_4149_Transcript_4/4_Conf      CATATTATGGTTTTGAAAAGTAATTC TCAAATAATGATATTTGTGCATGT
Locus_4149_Transcript_1/4_Conf      CATATTATGGTTTTGAAAAGTAATTC TCAAATAATGATATTTGTGCATGT
Locus_4149_Transcript_2/4_Conf      CATATTATGGTTTTGAAAAGTAATTC TCAAATAATGATATTTGTGCATGT
*****

Locus_4149_Transcript_3/4_Conf      AAATAGTTATATTTTTAATACTTGTTATATATATATATATATA
Locus_4149_Transcript_4/4_Conf      AAATAGTTATATTTTTAATACTTGTTATATATATATATATATA
Locus_4149_Transcript_1/4_Conf      AAATAGTTATATTTTTAATACTTGTTATATATATATATATATA
Locus_4149_Transcript_2/4_Conf      AAATAGTTATATTTTTAATACTTGTTATATATATATATATATA
*****

```

-Translation of the largest contig,  
Locus\_4149\_Transcript\_2/4\_Confidence\_0.700\_Length\_2043|Q9VA  
F0:

```

atgaattcctcaatttgggagtcagactcagccttcagattttatttacact
M N S S I W E S D S A F R F I Y T
gatttagttatggaatacataccagaatatttcaaagactggcaatatcatccatggat

```

t  
D L V M E Y I P E Y F K D W Q Y H P W I  
ttttcgggtcttaggttctatttttaattggattaagtgggtgtggtgcctttacttataat  
t  
F S V L G S I L I G L S G V L P L L I I  
ccattggaaggaggagaacatttttaaaagtggaggagggggcaaacttttgcgcggtatt  
g  
P L E G G E H F K S G G G G K L L R V L  
ctcagttttgacagtaggaggtctgctcggagatgtggtttttgcatttggtgccagaagc  
a  
L S F A V G G L L G D V F L H L L P E A  
tgggagaactacagtaacaaaggagagcgactcgtagtcacgtacgaattcgtagattc  
a  
W E N Y S N K G E R L V V M Y E F V D S  
ggaggaggtagtcacatcaatgacatgcgggtgctgggtattagctggcctcttggttatt  
c  
G G G S P S M T C G C W V L A G L L L F  
acgatgggtcgagaagttatttgctgggtacatggaagatgatgacgtttccgaggaaaa  
g  
T M V E K L F A G Y M E D D D V S E E K  
accgaacgaaagcgcaagaaaatgtctaaaattaattgtttgataaagaacaacaatgt  
c  
T E R K R K K M S K I N C L I K N N N V  
ttgagggctagaaacgaaaatggacgattctcgcaccagcaaattgctcaggcggacaaaa  
t  
L R A R N E N G R F S T S K C S G G Q N  
ggaaaaatgtgtgacattgaagttataaatggagctatcaaaaacggctggtgtatggt  
c  
G K M C D I E V I N G A I K N G C C M V  
gaggagctagagaaagaggctgtgagcaacaagtctaagcatgtttctggataacttaaa  
t  
E E L E K E A V S N K S K H V S G Y L N  
ctcatggcaactcaattgataatttcacacacgggtcttgctggttggtggttctttcat  
t  
L M A N S I D N F T H G L A V G G S F I  
gtttcattcaaactaggaatttttaacaacattcgcaattctagtgcatgagattccaca  
c  
V S F K L G I L T T F A I L V H E I P H  
gaagtgggagatttttgcaattttggtgcggtcagggtttctcgcgggtgggacgcggctcg  
a  
E V G D F A I L L R S G F S R W D A A R  
gcgcaactcatgaccgctggcgccggcctgcttgagctatgaccgcaatcggcgggaag  
t  
A Q L M T A G A G L L G A M T A I G G S  
cgggctacgagtgcaatggaagctagaacatgctggataatgcccttcacagccggcgg  
a  
R A T S A M E A R T C W I M P F T A G G

tttctccacataagtttagttacagtgctacctgacttgctgcaagaaagggatccaaa  
a

F L H I S L V T V L P D L L Q E R D P K  
gagtcgattaaacaatttggagcattgattgggtggtatagttctaattggcatcattgac  
c

E S I K Q F G A L I G G I V L M A S L T  
acattattggagtga  
T L L E -



- DNA sequence and protein for the largest open reading frame  
inLocus\_4149\_Transcript\_2/4\_Confidence\_0.700\_Length\_2043|Q9VAF0:

ATGAATTCCTCAATTTGGGAGTCAGACTCAGCCTTCAGATTTATTTACA  
CTGATTTAGTTATGGAATACATACCAGAATATTTCAAAGACTGGCAATATCATCCATGGA  
TTTTTTTCGGTCTTAGGTTCTATTTTAAATTGGATTAAGTGGTGTGTTGCCTTTACTTATAA  
TTCCATTGGAAGGAGGAGAACATTTTAAAAGTGGAGGAGGGGGCAAACCTTTGCGCGTAT  
TGCTCAGTTTTGCAGTAGGAGGTCTGCTCGGAGATGTGTTTTTGCATTTGTTGCCAGAAG  
CATGGGAGAACTACAGTAACAAAGGAGAGCGACTCGTAGTCATGTACGAATTCGTAGATT  
CAGGAGGAGGTAGTCCATCAATGACATGCGGGTCTGGGTATTAGCTGGCCTCTTGTTAT  
TCACGATGGTCGAGAAGTTATTTGCTGGTTACATGGAAGATGATGACGTTTCCGAGGAAA  
AGACCGAACGAAAGCGCAAGAAAATGTCTAAAATTAATTGTTTTGATAAAGAACAACAATG  
TCTTGAGGGCTAGAAACGAAAATGGACGATTCTCGACCAGCAAATGCTCAGGCGGACAAA  
ATGGAAAAATGTGTGACATTGAAGTTATAAATGGAGCTATCAAAAACGGCTGTTGTATGG  
TCGAGGAGCTAGAGAAAGAGGCTGTGAGCAACAAGTCTAAGCATGTTTCTGGATACTTAA  
ATCTCATGGCAAACCTCAATTGATAATTTACACACCGGTCTTGCTGTTGGTGGTTCTTTCA  
TTGTTTCATTCAAACCTAGGAATTTTAAACAACATTTCGCAATTCTAGTGCATGAGATTCCAC  
ACGAAGTGGGCGATTTTGCATTTTGTGCGGTGAGTTTCTCGCGGTGGGACGCGGCTC  
GAGCGCAACTCATGACCGCTGGCGCCGGCCTGCTTGGAGCTATGACCGCAATCGGCGGAA  
GTCGGGCTACGAGTGAATGGAAGCTAGAACATGCTGGATAATGCCCTTACAGCCGGCG  
GATTTCTCCACATAAAGTTTAGTTACAGTGTACCTGACTTGTGCAAGAAAGGGATCCAA  
AAGAGTCGATTAACAATTTGGAGCATTGATTGGTGGTATAGTTCTAATGGCATCATTGA  
CCACATTATTGGAGTGA

MNSSIWESDSAFRFIYTDLMVEYIPEYFKDWQYHPWIFSVLGSILIGLSGVLPLLIIPLE  
GGEHFKSGGGKLLRVLLSFAVGGLLDVFLHLLPEAWENYSNKGERLVVMYEFVDSGGG  
SPSMTCGCWVLAGLLLFTMVEKLFAGYMEDDDVSEEKTERKRKKMSKINCLIKNNNVLRA  
RNENGRFSTSKCSGGQNGKMCIEVINGAIKNGCCMVEELEKEAVSNKSKHVSGLNLMA  
NSIDNFTHGLAVGGSFIVSFKLGILTTFAILVHEIPHEVGDFAILLRSGFSRWDAARAQL  
MTAGAGLLGAMTAIGSRATSAMEARTCWIMPFTAGGFLHISLVTVLPDLLQERDPKESI  
KQFGALIGGIVLMASLTTLLE-

- Alignment to the reference protein Q9VAF0:

| Score              | Expect                                                        | Method                          | Identities    | Positives     | Gaps         |
|--------------------|---------------------------------------------------------------|---------------------------------|---------------|---------------|--------------|
| 402<br>bits (1033) | 8e-143                                                        | Compositional matrix<br>adjust. | 221/385 (57%) | 269/385 (69%) | 39/385 (10%) |
| Query 4            | NSSFF--DEHIAMIYSNLMDQYMPYFKSFEYTPWVFSLLGSVVIGLSGIFPLLIIPTEE   |                                 |               |               | 61           |
| Sbjct 2            | NSS + D IY++L+ +Y+PEYFK ++Y PW+FS+LGS++IGLSG+ PL+IIP E        |                                 |               |               | 60           |
| Query 62           | KMAKEGYKDPADSKLLRVLLSFAVGGLLDVFLHLLPEAWEGDNQ-----DP           |                                 |               |               | 108          |
| Sbjct 61           | E +K KLLRVLLSFAVGGLLDVFLHLLPEAWE +                            |                                 |               |               | 118          |
| Query 109          | SSHPSLRSLWVLSGILIFTIVEKIFSGYASAD---EENPQPKCVEIA--NCLLRRHGGQ   |                                 |               |               | 163          |
| Sbjct 119          | PS+ G WV L+G+L+FT+VEK+F+GY D EE + K +++ NCL++ +               |                                 |               |               | 178          |
| Query 164          | LPEGE-----TSESCGGA-----CDIEDVGK-----VCFLREQEQKSKERKEQPKKVAGYL |                                 |               |               | 209          |
| Sbjct 179          | E TS+ GG CDIE + C + E E+++ K K V+GYL                          |                                 |               |               | 236          |
| Query 210          | NLLANSIDNFTHGLAVAGSFLVSRFHGILATFAILLHEIPHEVGDFAILLRSGFSRWDA   |                                 |               |               | 269          |
| Sbjct 237          | NL+ANSIDNFTHGLAV GSF+VSF+ GIL TFAIL+HEIPHEVGDFAILLRSGFSRWDA   |                                 |               |               | 296          |

Query 270 RAQLLTAGAGLLGALVAIGGSGVTSAMEARTSWIMPFTAGGFLHIALVTVLPDLLKEEER 329  
 RAQL+TAGAGLLGA+ AIGGS TSAMEART WIMPFTAGGFLHI+LVTVLPDLL+E +  
 Sbjct 297 RAQLMTAGAGLLGAMTAIGGSRATSAMEARTCWIMPFTAGGFLHISLVTVLPDLLQERDP 356  
  
 Query 330 KESIKQLLALVFGIALMAVMTMLFE 354  
 KESIKQ AL+ GI LMA +T L E  
 Sbjct 357 KESIKQFGALIGGIVLMAASLTTLLE 381

### 3. Sequence used for synthesis and expression.

ATGAATTCCTCAATTTGGGAGTCAGACTCAGCCTTCAGATTTATTTACACTGATTTAGTTATGGAATA  
 CATAACCAGAATATTTCAAAGACTGGCAATATCATCCATGGATTTTTTCGGTCTTAGGTTCTATTTTAA  
 TTGGATTAAGTGGTGTGTTGCCTTTACTTATAATTCCATTGGAAGGAGGAGAACATTTTAAAAGTGGA  
 GGAGGGGGCAAACTTTTGCGCGTATTGCTCAGTTTTGCAGTAGGAGGTCTGCTCGGAGATGTGTTTTT  
 GCATTTGTTGCCAGAAGCATGGGAGAACTACAGTAACAAAGGAGAGCGACTCGTAGTCATGTACGAAT  
 TCGTAGATTCAGGAGGAGGTAGTCCATCAATGACATGCGGGTGCTGGGTATTAGCTGGCCTCTTGTTA  
 TTCACGATGGTCGAGAAGTTATTTGCTGGTTACATGGAAGATGATGACGTTTTCCGAGGAAAAGACCGA  
 ACGAAAATGGACGATTCTCGACCAGCAAATGCTCAGGCGGACAAAATGGAAAATGTGTGACATTGAA  
 GTTATAAATGGAGCTATCAAAAACGGCTGTTGTATGGTCGAGGAGCTAGAGAAAAGAGGCTGTGAGCAA  
 CAAGTCTAAGCATGTTTCTGGATACTTAAATCTCATGGCAAACCAATTGATAATTTACACACCGGTC  
 TTGCTGTTGGTGGTTCTTTTCATTGTTTCATTCAAAC TAGGAATTTTAAACAACATTGCAATTCTAGTG  
 CATGAGATTCCACACGAAGTGGGCGATTTTGAATTTTGTGCGGTGAGGTTTCTCGCGGTGGGACGC  
 GGCTCGAGCGCAACTCATGACCGCTGGCGCCGGCCTGCTTGGAGCTATGACCGCAATCGGCGGAAGTC  
 GGGCTACGAGTGCAATGGAAGCTAGAACATGCTGGATAATGCCCTTCACAGCCGGCGGATTTCTCCAC  
 ATAAGTTTTAGTTACAGTGCTACCTGACTTGCTGCAAGAAAGGGATCCAAAAGAGTCGATTAACAATT  
 TGGAGCATTGATTGGTGGTATAGTTCTAATGGCATCATTGACCACATTATTGGAGTGA
